# Supplementary material for: Metal-free visible-light-initiated direct C3 alkylation of quinoxalin-2(1H)-ones and coumarins with unactivated alkyl iodides
Source: Royal Society of Chemistry journal article supplement (doi:10.1039/d1gc03992j), 2021-12-13

## *Supporting information*

### **Metal-Free Visible-Light-Initiated Direct C3 Alkylation of Quinoxalin-2(1*H*)-ones and Coumarins with Unactivated Alkyl Iodides**

Jun Sun, Hua Yang,\* and Bo Zhang\*

*State Key Laboratory of Natural Medicines, China Pharmaceutical University,  
Nanjing 210009, China*

*E-mail: zb3981444@cpu.edu.cn; yanghuacpu@126.com*

#### **Table of contents**

|                                                                                                       |     |
|-------------------------------------------------------------------------------------------------------|-----|
| General                                                                                               | S2  |
| Optimization of reaction conditions                                                                   | S3  |
| General procedure for direct C3 alkylation of quinoxalin-2(1 <i>H</i> )-ones with alkyl iodides (GP1) | S7  |
| General procedure for direct C3 alkylation of coumarins with alkyl iodides (GP2)                      | S7  |
| Physical data of the compounds                                                                        | S8  |
| Evaluation of other substrates                                                                        | S33 |
| Larger scale experiments                                                                              | S35 |
| Mechanistic studies                                                                                   | S36 |
| References                                                                                            | S49 |
| NMR spectra                                                                                           | S50 |

## General

All manipulations were conducted with a standard *Schlenk* tube under a nitrogen atmosphere. Unless otherwise noted, materials obtained from commercial suppliers were used without further purification. Anhydrous cyclohexane, dimethyl sulfoxide and  $\text{CH}_2\text{Cl}_2$  were purchased from J&K Chemical or Energy Chemical and used as received. These solvents were dried and degassed by commercial suppliers. Alkyl halides were purchased from commercial sources or prepared according to the reported method.<sup>[1]</sup> Quinoxalinone substrates were prepared according to the reported method.<sup>[2]</sup> Coumarin substrates were prepared according to the reported method.<sup>[3]</sup>

Flash column chromatography was carried out on silica gel (200-300 mesh). Thin layer chromatography (TLC) was performed using silica gel 60 F<sub>254</sub> plates.

<sup>1</sup>H NMR spectra were recorded on a *Bruker AV-300, AV-400 or AV-500* spectrometer at room temperature. Chemical shifts (in ppm) were referenced to tetramethylsilane ( $\delta = 0$  ppm) in  $\text{CDCl}_3$  as an internal standard. <sup>13</sup>C NMR spectra were obtained by the same NMR spectrometer and were calibrated with  $\text{CDCl}_3$  ( $\delta = 77.00$  ppm). <sup>19</sup>F NMR spectra were obtained by the same NMR spectrometer and using  $\text{CFCl}_3$  as external standard. Data for <sup>1</sup>H NMR are reported as follows: chemical shifts ( $\delta$  ppm), multiplicity (s = singlet, d = doublet, t = triplet, q = quartet, m = multiplet or unresolved, br s = broad singlet), coupling constant (Hz) and integration. Data for <sup>13</sup>C NMR are reported in terms of chemical shift and multiplicity where appropriate. High-Resolution Mass Spectrometry (HRMS) were performed on an *Agilent 6545 Q-TOF* for HRMS. The yields were determined on a *METTLER TOLEDO ME 104* balance (accuracy: 0.1 mg). Melting points (Mp) were determined on an RY-1G and are uncorrected.

## Optimization of reaction conditions

Table S1. Alkylation of **1**: evaluation of bases<sup>a</sup>

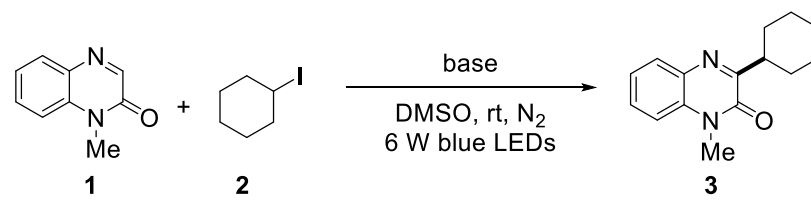  
**1** + **2**  $\xrightarrow[\text{DMSO, rt, N}_2, \text{6 W blue LEDs}]{\text{base}}$  **3**

  
DABCO      DBU      TBD      MTBD      TMEDA

| entry | base                            | yield <sup>b</sup> (%) |
|-------|---------------------------------|------------------------|
| 1     | DABCO                           | 0                      |
| 2     | DBU                             | 22                     |
| 3     | TBD                             | 25                     |
| 4     | MTBD                            | 55                     |
| 5     | Et <sub>3</sub> N               | 0                      |
| 6     | TMEDA                           | trace                  |
| 7     | K <sub>2</sub> CO <sub>3</sub>  | 0                      |
| 8     | Na <sub>2</sub> CO <sub>3</sub> | 0                      |

<sup>a</sup>Reaction conditions: **1** (0.2 mmol), **2** (0.6 mmol), and base (0.4 mmol) in DMSO (2.0 mL) were irradiated with 6 W blue LEDs at room temperature under N<sub>2</sub>. <sup>b</sup>Isolated yields.

**Table S2. Alkylation of 1: evaluation of solvents<sup>a</sup>**

Reaction scheme showing the alkylation of compound **1** (1-methyl-2-oxo-1H-benzimidazole) with compound **2** (iodocyclohexane) to form compound **3** (1-methyl-2-(cyclohexyl)-2-oxo-1H-benzimidazole). The reaction conditions are MTBD, solvent, rt, N<sub>2</sub>, and 6 W blue LEDs.

| entry | solvent                         | yield <sup>b</sup> (%) |
|-------|---------------------------------|------------------------|
| 1     | CH <sub>3</sub> CN              | 14                     |
| 2     | EtOAc                           | 13                     |
| 3     | DMF                             | 15                     |
| 4     | CH <sub>2</sub> Cl <sub>2</sub> | 22                     |
| 5     | THF                             | 11                     |
| 6     | MeOH                            | 0                      |

<sup>a</sup>Reaction conditions: **1** (0.2 mmol), **2** (0.6 mmol), and MTBD (0.4 mmol) in solvent (2.0 mL) were irradiated with 6 W blue LEDs at room temperature under N<sub>2</sub>. <sup>b</sup>Isolated yields.



**Table S4. Alkylation of 58: evaluation of bases<sup>a</sup>**

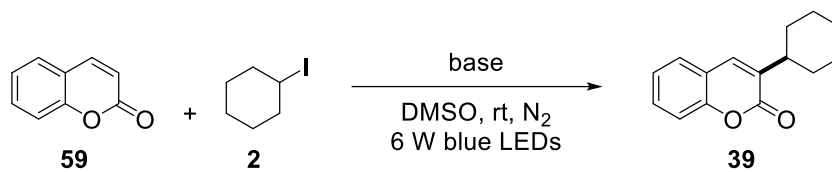

| entry | base  | yield <sup>b</sup> (%) |
|-------|-------|------------------------|
| 1     | DABCO | 0                      |
| 2     | DBU   | trace                  |
| 3     | TBD   | 45                     |
| 4     | MTBD  | 80                     |

<sup>a</sup>Reaction conditions: **59** (0.2 mmol), **2** (0.6 mmol), and base (0.4 mmol) in DMSO (2.0 mL) were irradiated with 6 W blue LEDs at room temperature under N<sub>2</sub>. <sup>b</sup>Isolated yields.

***General procedure for direct C3 alkylation of quinoxalin-2(1H)-ones with alkyl iodides (GP1):***

Quinoxalin-2(1H)-one (0.2 mmol, 1.0 equiv), alkyl iodide (1.0 mmol, 5.0 equiv), and MTBD (1.0 mmol, 5.0 equiv) were placed in a dry 10 mL Schlenk tube under a nitrogen atmosphere. Then anhydrous DMSO (2.0 mL) was added with a syringe, and the reaction mixture was irradiated with 6 W blue LEDs at room temperature under N<sub>2</sub> for 12 h. After completion of the reaction, the solvent was removed under reduced pressure and the residue was purified by flash column chromatography on silica gel to afford the product.

***General procedure for direct C3 alkylation of coumarins with alkyl iodides (GP2):***

Coumarin (0.2 mmol, 1.0 equiv), alkyl halide (0.6 mmol, 3.0 equiv), and MTBD (0.4 mmol, 2.0 equiv) were placed in a dry 10 mL Schlenk tube under a nitrogen atmosphere. Then anhydrous DMSO (2.0 mL) was added with a syringe, and the reaction mixture was irradiated with 6 W blue LEDs at room temperature under N<sub>2</sub> for 12 h. After completion of the reaction, the solvent was removed under reduced pressure and the residue was purified by flash column chromatography on silica gel to afford the product.

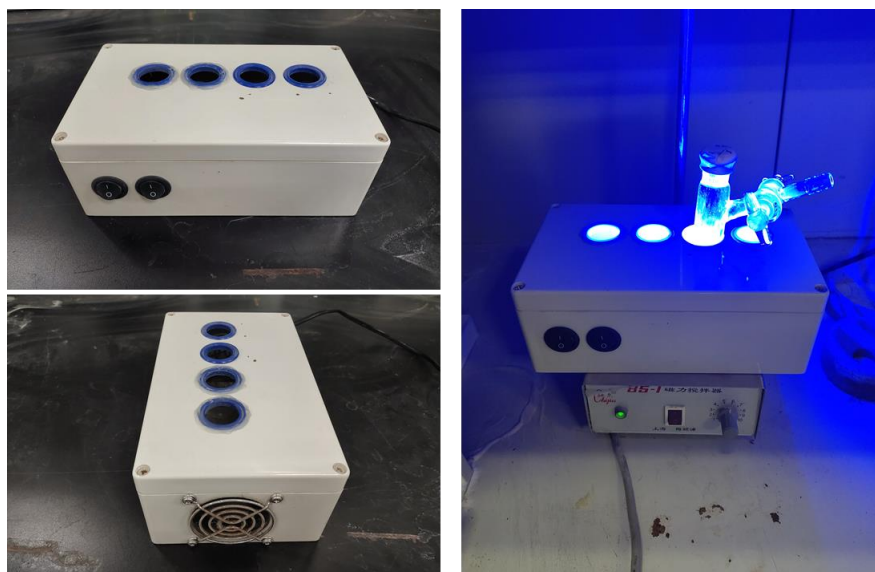

Reaction setup (4x6 W blue LEDs)

## Physical data of the compounds

### 3-Cyclohexyl-1-methylquinoxalin-2(1H)-one (**3**)<sup>[4]</sup>

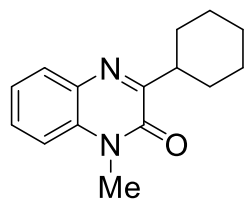

According to **GP1** with 1-methylquinoxalin-2(1H)-one (32.0 mg, 0.2 mmol, 1.0 equiv), iodocyclohexane (130  $\mu$ L, 1.0 mmol, 5.0 equiv), and MTBD (144  $\mu$ L, 1.0 mmol, 5.0 equiv). The crude reaction mixture was purified by flash silica gel column chromatography (petroleum ether/EtOAc = 10:1) to afford the desired product **3** as white solid (42.4 mg, 88%). Mp: 98-100  $^{\circ}$ C; **<sup>1</sup>H NMR** (400 MHz, CDCl<sub>3</sub>)  $\delta$  7.83 (d,  $J$  = 7.9 Hz, 1H), 7.51 (t,  $J$  = 7.7 Hz, 1H), 7.36-7.26 (m, 2H), 3.70 (s, 3H), 3.38-3.31 (m, 1H), 1.95 (d,  $J$  = 12.0 Hz, 2H), 1.87 (d,  $J$  = 12.6 Hz, 2H), 1.77 (d,  $J$  = 12.6 Hz, 1H), 1.63-1.42 (m, 4H), 1.37-1.23 (m, 1H); **<sup>13</sup>C NMR** (101 MHz, CDCl<sub>3</sub>)  $\delta$  164.2, 154.5, 132.9, 132.8, 129.7, 129.3, 123.4, 113.4, 40.7, 30.5, 29.0, 26.3, 26.1; **HRMS** (ESI) calculated for C<sub>15</sub>H<sub>18</sub>N<sub>2</sub>O [M+Na]<sup>+</sup>  $m/z$  265.1311, found 265.1314.

### 3-Cyclopentyl-1-methylquinoxalin-2(1H)-one (**4**)<sup>[5]</sup>

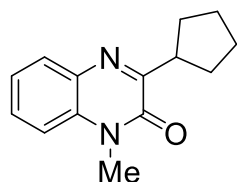

According to **GP1** with 1-methylquinoxalin-2(1H)-one (32.4 mg, 0.2 mmol, 1.0 equiv), iodocyclopentane (196.0 mg, 1.0 mmol, 5.0 equiv), and MTBD (144  $\mu$ L, 1.0 mmol, 5.0 equiv). The crude reaction mixture was purified by flash silica gel column chromatography (petroleum ether/EtOAc = 10:1) to afford the desired product **4** as white solid (35.8 mg, 79%). Mp: 89-91  $^{\circ}$ C; **<sup>1</sup>H NMR** (400 MHz, CDCl<sub>3</sub>)  $\delta$  7.82 (dd,  $J$  = 7.9, 1.2 Hz, 1H), 7.54-7.46 (m, 1H), 7.36-7.27 (m, 2H), 3.77-3.63 (m, 4H), 2.13-2.00 (m, 2H), 1.98-1.87 (m, 2H), 1.86-1.77 (m, 2H), 1.75-1.65 (m, 2H); **<sup>13</sup>C NMR** (75 MHz, CDCl<sub>3</sub>)  $\delta$  163.7, 155.0, 132.9, 132.7, 129.7, 129.3, 123.3, 113.4, 42.7, 30.8, 29.0, 25.9; **HRMS** (ESI) calculated for C<sub>14</sub>H<sub>16</sub>N<sub>2</sub>O [M+H]<sup>+</sup>  $m/z$  229.1335, found 229.1340.



### 3-Cycloheptyl-1-methylquinoxalin-2(1H)-one (5)

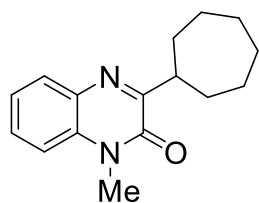

According to **GPI** with 1-methylquinoxalin-2(1H)-one (32.1 mg, 0.2 mmol, 1.0 equiv), iodocycloheptane (224.1 mg, 1.0 mmol, 5.0 equiv), and MTBD (144  $\mu$ L, 1.0 mmol, 5.0 equiv). The crude reaction mixture was purified by flash silica gel column chromatography (petroleum ether/EtOAc = 10:1) to afford the desired product **5** as white solid (48.2 mg, 94%). Mp: 81-83  $^{\circ}$ C;  $^1\text{H NMR}$  (400 MHz,  $\text{CDCl}_3$ )  $\delta$  7.83 (dd,  $J$  = 8.0, 1.2 Hz, 1H), 7.54-7.46 (m, 1H), 7.35-7.27 (m, 2H), 3.70 (s, 3H), 3.53-3.43 (m, 1H), 2.02-1.92 (m, 2H), 1.89-1.76 (m, 4H), 1.75-1.67 (m, 2H) 1.66-1.55 (m, 4H);  $^{13}\text{C NMR}$  (75 MHz,  $\text{CDCl}_3$ )  $\delta$  165.3, 154.4, 132.8, 132.7, 129.7, 129.3, 123.4, 113.4, 42.4, 32.2, 29.0, 28.1, 27.1; **HRMS** (ESI) calculated for  $\text{C}_{16}\text{H}_{20}\text{N}_2\text{O}$   $[\text{M}+\text{H}]^+$   $m/z$  257.1648, found 257.1644.

### 3-Cyclooctyl-1-methylquinoxalin-2(1H)-one (6)

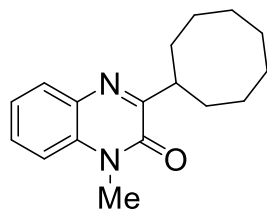

According to **GPI** with 1-methylquinoxalin-2(1H)-one (32.2 mg, 0.2 mmol, 1.0 equiv), iodocyclooctane (238.1 mg, 1.0 mmol, 5.0 equiv), and MTBD (144  $\mu$ L, 1.0 mmol, 5.0 equiv). The crude reaction mixture was purified by flash silica gel column chromatography (petroleum ether/EtOAc = 10:1) to afford the desired product **6** as white solid (49.2 mg, 91%). Mp: 56-58  $^{\circ}$ C;  $^1\text{H NMR}$  (400 MHz,  $\text{CDCl}_3$ )  $\delta$  7.83 (dd,  $J$  = 8.0, 1.2 Hz, 1H), 7.54-7.46 (m, 1H), 7.35-7.27 (m, 2H), 3.70 (s, 3H), 3.50-3.51 (m, 1H), 1.91-1.84 (m, 4H), 1.83-1.76 (m, 2H), 1.74-1.57 (m, 8H);  $^{13}\text{C NMR}$  (101 MHz,  $\text{CDCl}_3$ )  $\delta$  165.7, 154.4, 132.8, 132.7, 129.7, 129.2, 123.4, 113.4, 40.4, 30.5, 29.0, 26.6, 26.5, 25.9; **HRMS** (ESI) calculated for  $\text{C}_{17}\text{H}_{22}\text{N}_2\text{O}$   $[\text{M}+\text{H}]^+$   $m/z$  271.1805, found 271.1803.

### 1-Methyl-3-(oxetan-3-yl)quinoxalin-2(1H)-one (7)

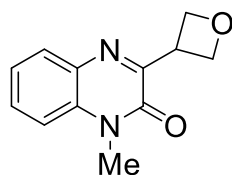

According to **GP1** with 1-methylquinoxalin-2(1H)-one (32.1 mg, 0.2 mmol, 1.0 equiv), 3-iodooxetane (184.0 mg, 1.0 mmol, 5.0 equiv), and MTBD (144  $\mu$ L, 1.0 mmol, 5.0 equiv). The crude reaction mixture was purified by flash silica gel column chromatography (petroleum ether/EtOAc = 3:1) to afford the desired product **7** as yellow solid (31.1 mg, 72%). Mp: 105-107  $^{\circ}$ C;  **$^1$ H NMR** (400 MHz,  $\text{CDCl}_3$ )  $\delta$  7.92-7.86 (m, 1H), 7.60-7.53 (m, 1H), 7.41-7.30 (m, 2H), 5.11-5.00 (m, 4H), 4.72-4.61 (m, 1H), 3.68 (s, 3H);  **$^{13}$ C NMR** (75 MHz,  $\text{CDCl}_3$ )  $\delta$  158.0, 154.1, 132.8, 132.4, 130.1, 129.9, 123.7, 113.5, 74.3, 38.1, 28.8; **HRMS** (ESI) calculated for  $\text{C}_{12}\text{H}_{12}\text{N}_2\text{O}_2$   $[\text{M}+\text{Na}]^+$  m/z 239.0791, found 239.0788.

### 1-Methyl-3-(tetrahydrofuran-3-yl)quinoxalin-2(1H)-one (8)

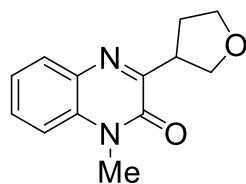

According to **GP1** with 1-methylquinoxalin-2(1H)-one (32.3 mg, 0.2 mmol, 1.0 equiv), 3-iodotetrahydrofuran (198.0 mg, 1.0 mmol, 5.0 equiv), and MTBD (144  $\mu$ L, 1.0 mmol, 5.0 equiv). The crude reaction mixture was purified by flash silica gel column chromatography (petroleum ether/EtOAc = 3:1) to afford the desired product **8** as white solid (39.0 mg, 85%). Mp: 110-112  $^{\circ}$ C;  **$^1$ H NMR** (400 MHz,  $\text{CDCl}_3$ )  $\delta$  7.85 (dd,  $J = 8.0, 1.3$  Hz, 1H), 7.58-7.50 (m, 1H), 7.38-7.28 (m, 2H), 4.29-4.18 (m, 1H), 4.10-3.89 (m, 4H), 3.71 (s, 3H), 2.52-2.25 (m, 2H);  **$^{13}$ C NMR** (101 MHz,  $\text{CDCl}_3$ )  $\delta$  160.0, 154.9, 133.0, 132.5, 130.0, 129.9, 123.6, 113.5, 71.3, 68.6, 42.3, 30.0, 29.1; **HRMS** (ESI) calculated for  $\text{C}_{13}\text{H}_{14}\text{N}_2\text{O}_2$   $[\text{M}+\text{H}]^+$  m/z 231.1128, found 231.1124.

### 1-Methyl-3-(tetrahydro-2H-pyran-4-yl)quinoxalin-2(1H)-one (9)<sup>[6]</sup>

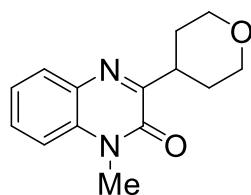

According to **GP1** with 1-methylquinoxalin-2(1*H*)-one (32.2 mg, 0.2 mmol, 1.0 equiv), 4-iodotetrahydro-2*H*-pyran (212.0 mg, 1.0 mmol, 5.0 equiv), and MTBD (144  $\mu$ L, 1.0 mmol, 5.0 equiv). The crude reaction mixture was purified by flash silica gel column chromatography (petroleum ether/EtOAc = 2:1) to afford the desired product **9** as white solid (47.6 mg, 98%). Mp: 174-176 °C; **<sup>1</sup>H NMR** (400 MHz, CDCl<sub>3</sub>)  $\delta$  7.85 (d, *J* = 7.7 Hz, 1H), 7.52 (t, *J* = 7.4 Hz, 1H), 7.39-7.28 (m, 2H), 4.09 (d, *J* = 10.9 Hz, 2H), 3.70 (s, 3H), 3.66-3.53 (m, 3H), 1.93 (dt, *J* = 24.2, 7.8 Hz, 4H); **<sup>13</sup>C NMR** (101 MHz, CDCl<sub>3</sub>)  $\delta$  161.8, 154.2, 132.7, 132.6, 129.8, 129.6, 123.4, 113.4, 67.7, 38.0, 29.9, 28.9; **HRMS** (ESI) calculated for C<sub>14</sub>H<sub>16</sub>N<sub>2</sub>O<sub>2</sub> [M+H]<sup>+</sup> *m/z* 245.1285, found 245.1280.

***tert*-Butyl 4-(4-methyl-3-oxo-3,4-dihydroquinoxalin-2-yl)piperidine-1-carboxylate (10)<sup>[7]</sup>**

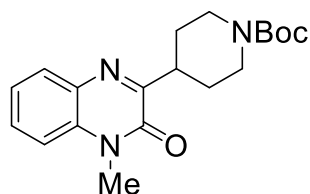

According to **GP1** with 1-methylquinoxalin-2(1*H*)-one (32.4 mg, 0.2 mmol, 1.0 equiv), *tert*-butyl 4-iodopiperidine-1-carboxylate (311.1 mg, 1.0 mmol, 5.0 equiv), and MTBD (144  $\mu$ L, 1.0 mmol, 5.0 equiv). The crude reaction mixture was purified by flash silica gel column chromatography (petroleum ether/EtOAc = 2:1) to afford the desired product **10** as white solid (65.7 mg, 96%). Mp: 180-182 °C; **<sup>1</sup>H NMR** (400 MHz, CDCl<sub>3</sub>)  $\delta$  7.83 (dd, *J* = 8.0, 1.4 Hz, 1H), 7.58-7.49 (m, 1H), 7.37-7.29 (m, 2H), 4.43-4.09 (m, 2H), 3.71 (s, 3H), 3.52-3.42 (m, 1H), 2.92 (t, *J* = 11.2 Hz, 2H), 1.94 (d, *J* = 12.0 Hz, 2H), 1.83-1.70 (m, 2H), 1.48 (s, 9H); **<sup>13</sup>C NMR** (101 MHz, CDCl<sub>3</sub>)  $\delta$  162.1, 154.7, 154.3, 132.8, 132.6, 129.8, 129.7, 123.5, 113.5, 79.2, 43.7, 38.8, 29.3, 29.0, 28.4; **HRMS** (ESI) calculated for C<sub>19</sub>H<sub>25</sub>N<sub>3</sub>O<sub>3</sub> [M+Na]<sup>+</sup> *m/z* 366.1788, found 366.1782.

**1-Methyl-3-(4-phenylbutan-2-yl)quinoxalin-2(1*H*)-one (11)**

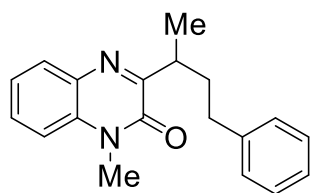

According to **GP1** with 1-methylquinoxalin-2(1*H*)-one (32.2 mg, 0.2 mmol, 1.0

equiv), (3-iodobutyl)benzene (260.1 mg, 1.0 mmol, 5.0 equiv), and MTBD (144  $\mu$ L, 1.0 mmol, 5.0 equiv). The crude reaction mixture was purified by flash silica gel column chromatography (petroleum ether/EtOAc = 10:1) to afford the desired product **11** as pale yellow oil (30.9 mg, 53%). <sup>1</sup>H NMR (400 MHz, CDCl<sub>3</sub>)  $\delta$  7.87-7.81 (m, 1H), 7.55-7.48 (m, 1H), 7.33 (t, *J* = 7.6 Hz, 1H), 7.28 (d, *J* = 8.3 Hz, 1H), 7.25-7.16 (m, 4H), 7.15-7.09 (m, 1H), 3.69 (s, 3H), 3.64-3.54 (m, 1H), 2.75-2.58 (m, 2H), 2.35-2.23 (m, 1H), 1.95-1.85 (m, 1H), 1.34 (d, *J* = 6.9 Hz, 3H); <sup>13</sup>C NMR (75 MHz, CDCl<sub>3</sub>)  $\delta$  164.1, 154.6, 142.5, 132.9, 132.7, 129.8, 129.5, 128.4, 128.1, 125.5, 123.4, 113.4, 36.2, 36.1, 33.9, 29.0, 18.5; HRMS (ESI) calculated for C<sub>19</sub>H<sub>20</sub>N<sub>2</sub>O [M+H]<sup>+</sup> *m/z* 293.1648, found 293.1643.

### 1-Methyl-3-(octan-3-yl)quinoxalin-2(1*H*)-one (**12**)

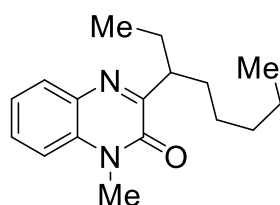

According to **GP1** with 1-methylquinoxalin-2(1*H*)-one (32.0 mg, 0.2 mmol, 1.0 equiv), 3-iodooctane (480.1 mg, 2.0 mmol, 10.0 equiv), and MTBD (144  $\mu$ L, 1.0 mmol, 5.0 equiv). The crude reaction mixture was purified by flash silica gel column chromatography (petroleum ether/EtOAc = 10:1) to afford the desired product **12** as colorless oil (29.0 mg, 53%). <sup>1</sup>H NMR (400 MHz, CDCl<sub>3</sub>)  $\delta$  7.85 (dd, *J* = 8.0, 1.3 Hz, 1H), 7.55-7.48 (m, 1H), 7.36-7.27 (m, 2H), 3.71 (s, 3H), 3.45-3.37 (m, 1H), 1.93-1.80 (m, 2H), 1.74-1.58 (m, 2H), 1.35-1.19 (m, 6H), 0.91-0.79 (m, 6H); <sup>13</sup>C NMR (101 MHz, CDCl<sub>3</sub>)  $\delta$  164.0, 155.0, 132.8, 132.7, 129.7, 129.3, 123.3, 113.4, 43.1, 32.9, 32.0, 29.1, 27.2, 26.1, 22.5, 14.0, 12.0; HRMS (ESI) calculated for C<sub>17</sub>H<sub>24</sub>N<sub>2</sub>O [M+H]<sup>+</sup> *m/z* 273.1961, found 273.1957.

### 3-((3*r*,5*r*,7*r*)-Adamantan-1-yl)-1-methylquinoxalin-2(1*H*)-one (**13**)<sup>[5]</sup>

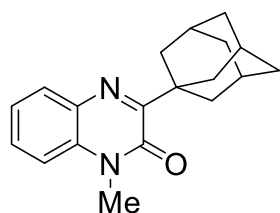

According to **GP1** with 1-methylquinoxalin-2(1*H*)-one (32.2 mg, 0.2 mmol, 1.0 equiv), (3*s*,5*s*,7*s*)-1-iodoadamantane (262.1 mg, 1.0 mmol, 5.0 equiv), and MTBD

(144  $\mu\text{L}$ , 1.0 mmol, 5.0 equiv). The crude reaction mixture was purified by flash silica gel column chromatography (petroleum ether/EtOAc = 20:1) to afford the desired product **13** as white solid (38.6 mg, 66%). Mp: 186-188  $^{\circ}\text{C}$ ;  $^1\text{H NMR}$  (400 MHz,  $\text{CDCl}_3$ )  $\delta$  7.83 (dd,  $J$  = 8.0, 1.3 Hz, 1H), 7.52-7.46 (m, 1H), 7.33-7.23 (m, 2H), 3.65 (s, 3H), 2.27-2.20 (m, 6H), 2.14-2.07 (m, 3H), 1.86-1.76 (m, 6H);  $^{13}\text{C NMR}$  (101 MHz,  $\text{CDCl}_3$ )  $\delta$  164.7, 153.5, 132.9, 132.3, 130.0, 129.4, 123.1, 113.2, 41.9, 38.7, 37.0, 28.6, 28.5; **HRMS** (ESI) calculated for  $\text{C}_{19}\text{H}_{22}\text{N}_2\text{O}$   $[\text{M}+\text{H}]^+$   $m/z$  295.1805, found 295.1800.

#### 1-Methyl-3-(2-methyl-4-phenylbutan-2-yl)quinoxalin-2(1H)-one (**14**)

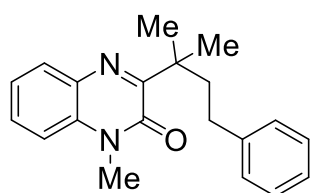

According to **GPI** with 1-methylquinoxalin-2(1H)-one (32.0 mg, 0.2 mmol, 1.0 equiv), (3-iodo-3-methylbutyl)benzene (548.1 mg, 2.0 mmol, 10.0 equiv), and MTBD (144  $\mu\text{L}$ , 1.0 mmol, 5.0 equiv). The crude reaction mixture was purified by flash silica gel column chromatography (petroleum ether/EtOAc = 8:1) to afford the desired product **14** as yellow oil (18.2 mg, 30%).  $^1\text{H NMR}$  (400 MHz,  $\text{CDCl}_3$ )  $\delta$  7.85 (dd,  $J$  = 8.0, 1.4 Hz, 1H), 7.54-7.48 (m, 1H), 7.35-7.30 (m, 1H), 7.23 (dd,  $J$  = 8.4, 0.9 Hz, 1H), 7.16-7.02 (m, 5H), 3.60 (s, 3H), 2.53-2.46 (m, 2H), 2.39-2.32 (m, 2H), 1.53 (s, 6H);  $^{13}\text{C NMR}$  (101 MHz,  $\text{CDCl}_3$ )  $\delta$  164.2, 153.6, 142.8, 133.3, 132.2, 130.1, 129.5, 128.5, 127.9, 125.3, 123.1, 113.2, 42.8, 41.7, 31.7, 28.7, 26.4;  $\text{C}_{20}\text{H}_{22}\text{N}_2\text{O}$   $[\text{M}+\text{H}]^+$   $m/z$  307.1805, found 307.1802.

#### 1-Methyl-3-pentylquinoxalin-2(1H)-one (**15**)<sup>[8]</sup>

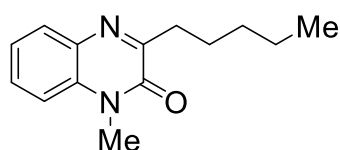

According to **GPI** with 1-methylquinoxalin-2(1H)-one (32.4 mg, 0.2 mmol, 1.0 equiv), 1-iodopentane (198.0 mg, 1.0 mmol, 5.0 equiv), and MTBD (144  $\mu\text{L}$ , 1.0 mmol, 5.0 equiv). The crude reaction mixture was purified by flash silica gel column chromatography (petroleum ether/EtOAc = 10:1) to afford the desired product **15** as yellow solid (39.9 mg, 87%). Mp: 75-77  $^{\circ}\text{C}$ ;  $^1\text{H NMR}$  (400 MHz,  $\text{CDCl}_3$ )  $\delta$  7.83 (dd,  $J$  = 8.0, 1.3 Hz, 1H), 7.55-7.48 (m, 1H), 7.37-7.27 (m, 2H), 3.70 (s, 3H), 2.94 (t,  $J$  = 7.6 Hz, 2H), 1.79 (p,  $J$  = 7.6 Hz, 2H), 1.48-1.35 (m, 4H), 0.92 (t,  $J$  = 7.0 Hz, 3H);  $^{13}\text{C}$

**NMR** (101 MHz, CDCl<sub>3</sub>)  $\delta$  161.3, 154.8, 133.0, 132.7, 129.5, 129.4, 123.4, 113.5, 34.3, 31.7, 28.9, 26.5, 22.5, 14.0; **HRMS** (ESI) calculated for C<sub>14</sub>H<sub>18</sub>N<sub>2</sub>O [M+H]<sup>+</sup> m/z 231.1492, found 231.1486.

### 3-Heptyl-1-methylquinoxalin-2(1H)-one (**16**)<sup>[6]</sup>

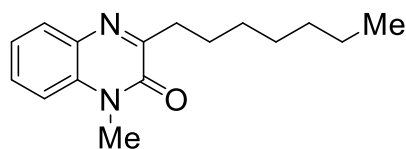

According to **GP1** with 1-methylquinoxalin-2(1H)-one (32.3 mg, 0.2 mmol, 1.0 equiv), 1-iodoheptane (226.1 mg, 1.0 mmol, 5.0 equiv), and MTBD (144  $\mu$ L, 1.0 mmol, 5.0 equiv). The crude reaction mixture was purified by flash silica gel column chromatography (petroleum ether/EtOAc = 10:1) to afford the desired product **16** as pale yellow solid (44.9 mg, 87%). Mp: 73-75 °C; **<sup>1</sup>H NMR** (400 MHz, CDCl<sub>3</sub>)  $\delta$  7.82 (dd,  $J$  = 8.0, 1.2 Hz, 1H), 7.54-7.48 (m, 1H), 7.37-7.25 (m, 2H), 3.69 (s, 3H), 2.93 (t,  $J$  = 7.6 Hz, 2H), 1.78 (p,  $J$  = 7.6 Hz, 2H), 1.49-1.26 (m, 8H), 0.88 (t,  $J$  = 6.8 Hz, 3H); **<sup>13</sup>C NMR** (101 MHz, CDCl<sub>3</sub>)  $\delta$  161.3, 154.8, 133.0, 132.6, 129.5, 129.4, 123.4, 113.4, 34.3, 31.7, 29.5, 29.1, 28.9, 26.8, 22.6, 14.0; **HRMS** (ESI) calculated for C<sub>16</sub>H<sub>22</sub>N<sub>2</sub>O [M+H]<sup>+</sup> m/z 259.1805, found 259.1799.

### 3-Isobutyl-1-methylquinoxalin-2(1H)-one (**17**)<sup>[9]</sup>

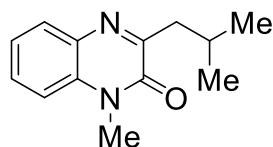

According to **GP1** with 1-methylquinoxalin-2(1H)-one (32.1 mg, 0.2 mmol, 1.0 equiv), 1-iodo-2-methylpropane (184.0 mg, 1.0 mmol, 5.0 equiv), and MTBD (144  $\mu$ L, 1.0 mmol, 5.0 equiv). The crude reaction mixture was purified by flash silica gel column chromatography (petroleum ether/EtOAc = 10:1) to afford the desired product **17** as yellow oil (27.3 mg, 63%). **<sup>1</sup>H NMR** (400 MHz, CDCl<sub>3</sub>)  $\delta$  7.84 (dd,  $J$  = 8.0, 1.4 Hz, 1H), 7.55-7.49 (m, 1H), 7.37-7.28 (m, 2H), 3.70 (s, 3H), 2.83 (d,  $J$  = 7.1 Hz, 2H), 2.40-2.27 (m, 1H), 1.01 (d,  $J$  = 6.7 Hz, 6H); **<sup>13</sup>C NMR** (101 MHz, CDCl<sub>3</sub>)  $\delta$  160.7, 155.0, 133.0, 132.6, 129.6, 129.5, 123.5, 113.5, 42.9, 29.0, 26.8, 22.7; **HRMS** (ESI) calculated for C<sub>13</sub>H<sub>16</sub>N<sub>2</sub>O [M+H]<sup>+</sup> m/z 217.1335, found 217.1331.

### 3-(6-Chlorohexyl)-1-methylquinoxalin-2(1H)-one (**18**)

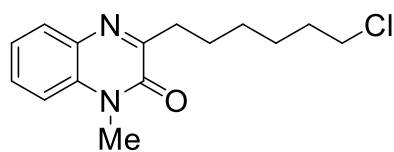

According to **GP1** with 1-methylquinoxalin-2(1H)-one (32.3 mg, 0.2 mmol, 1.0 equiv), 1-chloro-6-iodohexane (246.5 mg, 1.0 mmol, 5.0 equiv), and MTBD (144  $\mu$ L, 1.0 mmol, 5.0 equiv). The crude reaction mixture was purified by flash silica gel column chromatography (petroleum ether/EtOAc = 10:1) to afford the desired product **18** as pale yellow oil (45.1 mg, 81%). **<sup>1</sup>H NMR** (400 MHz, CDCl<sub>3</sub>)  $\delta$  7.82 (dd,  $J$  = 8.0, 1.3 Hz, 1H), 7.54-7.48 (m, 1H), 7.37-7.26 (m, 2H), 3.69 (s, 3H), 3.54 (t,  $J$  = 6.8 Hz, 2H), 2.94 (t,  $J$  = 7.6 Hz, 2H), 1.86-1.75 (m, 4H), 1.55-1.44 (m, 4H); **<sup>13</sup>C NMR** (75 MHz, CDCl<sub>3</sub>)  $\delta$  160.9, 154.8, 133.0, 132.6, 129.5, 129.5, 123.5, 113.5, 45.1, 34.1, 32.4, 29.0, 28.7, 26.6, 26.5; **HRMS** (ESI) calculated for C<sub>15</sub>H<sub>19</sub>ClN<sub>2</sub>O [M+H]<sup>+</sup>  $m/z$  279.1259, found 279.1256.

### 3-(Hex-5-yn-1-yl)-1-methylquinoxalin-2(1H)-one (**19**)<sup>[10]</sup>

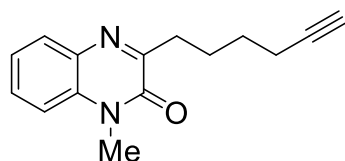

According to **GP1** with 1-methylquinoxalin-2(1H)-one (32.1 mg, 0.2 mmol, 1.0 equiv), 6-iodohex-1-yne (208.0 mg, 1.0 mmol, 5.0 equiv), and MTBD (144  $\mu$ L, 1.0 mmol, 5.0 equiv). The crude reaction mixture was purified by flash silica gel column chromatography (petroleum ether/EtOAc = 10:1) to afford the desired product **19** as white solid (38.8 mg, 81%). Mp: 82-84 °C; **<sup>1</sup>H NMR** (300 MHz, CDCl<sub>3</sub>)  $\delta$  7.82 (dd,  $J$  = 8.0, 1.2 Hz, 1H), 7.56-7.48 (m, 1H), 7.38-7.27 (m, 2H), 3.70 (s, 3H), 2.96 (t,  $J$  = 7.8 Hz, 2H), 2.27 (td,  $J$  = 7.1, 2.6 Hz, 2H), 1.99-1.86 (m, 3H), 1.69 (p,  $J$  = 7.2 Hz, 2H); **<sup>13</sup>C NMR** (75 MHz, CDCl<sub>3</sub>)  $\delta$  160.6, 154.8, 133.0, 132.6, 129.6, 129.5, 123.5, 113.5, 84.3, 68.3, 33.6, 29.0, 28.3, 25.7, 18.3; **HRMS** (ESI) calculated for C<sub>15</sub>H<sub>16</sub>N<sub>2</sub>O [M+H]<sup>+</sup>  $m/z$  241.1335, found 241.1330.

### Ethyl 4-(4-methyl-3-oxo-3,4-dihydroquinoxalin-2-yl)butanoate (**20**)<sup>[11]</sup>

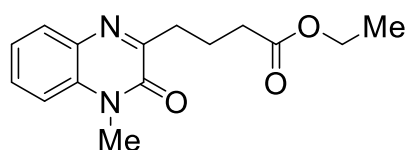

According to **GP1** with 1-methylquinoxalin-2(1*H*)-one (32.0 mg, 0.2 mmol, 1.0 equiv), ethyl 4-iodobutanoate (242.0 mg, 1.0 mmol, 5.0 equiv), and MTBD (144  $\mu$ L, 1.0 mmol, 5.0 equiv). The crude reaction mixture was purified by flash silica gel column chromatography (petroleum ether/EtOAc = 10:1) to afford the desired product **20** as yellow solid (30.2 mg, 55%). Mp: 101-103  $^{\circ}$ C;  $^1\text{H NMR}$  (400 MHz,  $\text{CDCl}_3$ )  $\delta$  7.83 (dd,  $J$  = 8.0, 1.1 Hz, 1H), 7.56-7.49 (m, 1H), 7.37-7.28 (m, 2H), 4.11 (q,  $J$  = 7.1 Hz, 2H), 3.70 (s, 3H), 2.99 (t,  $J$  = 7.4 Hz, 2H), 2.47 (t,  $J$  = 7.6 Hz, 2H), 2.17 (p,  $J$  = 7.5 Hz, 2H), 1.25 (t,  $J$  = 7.1 Hz, 3H);  $^{13}\text{C NMR}$  (101 MHz,  $\text{CDCl}_3$ )  $\delta$  173.4, 160.0, 154.8, 133.0, 132.6, 129.7, 129.7, 123.5, 113.5, 60.3, 33.8, 33.2, 29.0, 21.6, 14.2; **HRMS** (ESI) calculated for  $\text{C}_{15}\text{H}_{18}\text{N}_2\text{O}_3$   $[\text{M}+\text{H}]^+$   $m/z$  275.1390, found 275.1393.

### 1-Methyl-3-(pent-4-en-1-yl)quinoxalin-2(1*H*)-one (**21**)

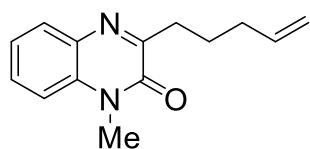

According to **GP1** with 1-methylquinoxalin-2(1*H*)-one (32.2 mg, 0.2 mmol, 1.0 equiv), 5-iodopent-1-ene (196.0 mg, 1.0 mmol, 5.0 equiv), and MTBD (144  $\mu$ L, 1.0 mmol, 5.0 equiv). The crude reaction mixture was purified by flash silica gel column chromatography (petroleum ether/EtOAc = 10:1) to afford the desired product **21** as white solid (31.5 mg, 69%). Mp: 57-59  $^{\circ}$ C;  $^1\text{H NMR}$  (500 MHz,  $\text{CDCl}_3$ )  $\delta$  7.83 (dd,  $J$  = 7.9, 1.0 Hz, 1H), 7.53-7.47 (m, 1H), 7.34-7.25 (m, 2H), 5.92-5.82 (m, 1H), 5.10-5.02 (m, 1H), 5.00-4.95 (m, 1H), 3.68 (s, 3H), 2.95 (t,  $J$  = 7.5 Hz, 2H), 2.21 (q,  $J$  = 7.2 Hz, 2H), 1.91 (p,  $J$  = 7.6 Hz, 2H);  $^{13}\text{C NMR}$  (101 MHz,  $\text{CDCl}_3$ )  $\delta$  160.8, 154.7, 138.2, 132.9, 132.6, 129.5, 129.4, 123.4, 114.8, 113.4, 33.6, 33.5, 28.9, 25.8; **HRMS** (ESI) calculated for  $\text{C}_{14}\text{H}_{16}\text{N}_2\text{O}$   $[\text{M}+\text{H}]^+$   $m/z$  229.1335, found 229.1334.

### 1-Methyl-3-(4,4,4-trifluorobutyl)quinoxalin-2(1*H*)-one (**22**)

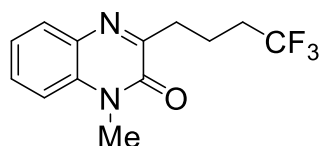

According to **GP1** with 1-methylquinoxalin-2(1*H*)-one (32.0 mg, 0.2 mmol, 1.0 equiv), 1,1,1-trifluoro-4-iodobutane (238.0 mg, 1.0 mmol, 5.0 equiv), and MTBD (144  $\mu$ L, 1.0 mmol, 5.0 equiv). The crude reaction mixture was purified by flash silica gel column chromatography (petroleum ether/EtOAc = 10:1) to afford the desired product **22** as white solid (42.6 mg, 79%). Mp: 79-81  $^{\circ}$ C;  $^1\text{H NMR}$  (400 MHz,  $\text{CDCl}_3$ )



$\delta$  7.82 (dd,  $J = 8.0, 1.2$  Hz, 1H), 7.57-7.50 (m, 1H), 7.38-7.28 (m, 2H), 3.69 (s, 3H), 3.01 (t,  $J = 7.4$  Hz, 2H), 2.33-2.20 (m, 2H), 2.15-2.05 (m, 2H);  $^{13}\text{C}$  NMR (75 MHz,  $\text{CDCl}_3$ )  $\delta$  159.1, 154.7, 133.0, 132.6, 129.8, 129.7, 127.1 (q,  $J = 275.0$  Hz), 123.6, 113.6, 33.3 (q,  $J = 28.4$  Hz), 32.5, 29.0, 18.6 (q,  $J = 3.1$  Hz);  $^{19}\text{F}$  NMR (282 MHz,  $\text{CDCl}_3$ )  $\delta$  -66.31; HRMS (ESI) calculated for  $\text{C}_{13}\text{H}_{13}\text{F}_3\text{N}_2\text{O}$   $[\text{M}+\text{H}]^+$   $m/z$  271.1053, found 271.1048.

### 1-Methyl-3-(4-(trimethylsilyl)butyl)quinoxalin-2(1H)-one (23)

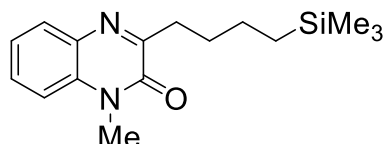

According to **GP1** with 1-methylquinoxalin-2(1H)-one (32.1 mg, 0.2 mmol, 1.0 equiv), (4-iodobutyl)trimethylsilane (256.2 mg, 1.0 mmol, 5.0 equiv), and MTBD (144  $\mu\text{L}$ , 1.0 mmol, 5.0 equiv). The crude reaction mixture was purified by flash silica gel column chromatography (petroleum ether/EtOAc = 10:1) to afford the desired product **23** as white solid (54.6 mg, 95%). Mp: 102-104  $^\circ\text{C}$ ;  $^1\text{H}$  NMR (300 MHz,  $\text{CDCl}_3$ )  $\delta$  7.85 (dd,  $J = 7.9, 1.3$  Hz, 1H), 7.57-7.50 (m, 1H), 7.39-7.28 (m, 2H), 3.72 (s, 3H), 2.97 (t,  $J = 7.8$  Hz, 2H), 1.83 (p,  $J = 7.5$  Hz, 2H), 1.56-1.44 (m, 2H), 0.65-0.57 (m, 2H), 0.01 (s, 9H);  $^{13}\text{C}$  NMR (101 MHz,  $\text{CDCl}_3$ )  $\delta$  161.4, 154.9, 133.1, 132.7, 129.6, 129.4, 123.5, 113.5, 34.2, 30.7, 29.0, 24.0, 16.5, -1.7; HRMS (ESI) calculated for  $\text{C}_{16}\text{H}_{24}\text{N}_2\text{OSi}$   $[\text{M}+\text{H}]^+$   $m/z$  289.1731, found 289.1725.

### 3-(3,7-Dimethyloct-6-en-1-yl)-1-methylquinoxalin-2(1H)-one (24)

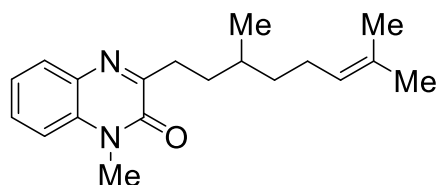

According to **GP1** with 1-methylquinoxalin-2(1H)-one (32.1 mg, 0.2 mmol, 1.0 equiv), 8-iodo-2,6-dimethyloct-2-ene (266.2 mg, 1.0 mmol, 5.0 equiv), and MTBD (144  $\mu\text{L}$ , 1.0 mmol, 5.0 equiv). The crude reaction mixture was purified by flash silica gel column chromatography (petroleum ether/EtOAc = 10:1) to afford the desired product **24** as pale yellow oil (37.0 mg, 62%).  $^1\text{H}$  NMR (300 MHz,  $\text{CDCl}_3$ )  $\delta$  7.82 (dd,  $J = 8.0, 1.4$  Hz, 1H), 7.54-7.46 (m, 1H), 7.36-7.24 (m, 2H), 5.16-5.06 (m, 1H), 3.69 (s, 3H), 3.04-2.85 (m, 2H), 2.10-1.92 (m, 2H), 1.87-1.76 (m, 1H), 1.67 (s, 3H), 1.63-1.54 (m, 5H), 1.49-1.38 (m, 1H), 1.28-1.21 (m, 1H), 0.99 (d,  $J = 6.2$  Hz, 3H);  $^{13}\text{C}$  NMR

(101 MHz, CDCl<sub>3</sub>)  $\delta$  161.6, 154.8, 133.0, 132.7, 131.0, 129.5, 129.4, 124.9, 123.5, 113.5, 36.9, 33.7, 32.5, 32.0, 29.0, 25.7, 25.5, 19.4, 17.6; **HRMS** (ESI) calculated for C<sub>19</sub>H<sub>26</sub>N<sub>2</sub>O [M+H]<sup>+</sup> m/z 299.2118, found 299.2112.

**3-(4-(4-(Bis(2-chloroethyl)amino)phenyl)butyl)-1-methylquinoxalin-2(1H)-one (25)**

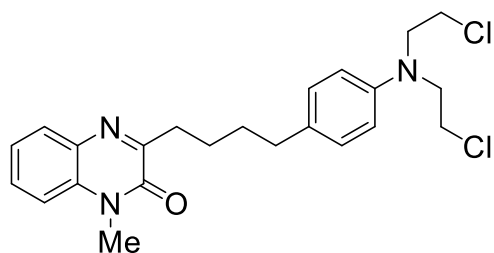

According to **GP1** with 1-methylquinoxalin-2(1H)-one (32.2 mg, 0.2 mmol, 1.0 equiv), *N,N*-bis(2-chloroethyl)-4-(4-iodobutyl)aniline (400.1 mg, 1.0 mmol, 5.0 equiv), and MTBD (144  $\mu$ L, 1.0 mmol, 5.0 equiv). The crude reaction mixture was purified by flash silica gel column chromatography (petroleum ether/EtOAc = 10:1) to afford the desired product **25** as white solid (34.5 mg, 40%). Mp: 142-144 °C; **<sup>1</sup>H NMR** (400 MHz, CDCl<sub>3</sub>)  $\delta$  7.82 (dd, *J* = 8.0, 1.2 Hz, 1H), 7.55-7.48 (m, 1H), 7.36-7.27 (m, 2H), 7.09 (d, *J* = 8.6 Hz, 2H), 6.61 (d, *J* = 8.6 Hz, 2H), 3.74-3.65 (m, 7H), 3.64-3.56 (m, 4H), 2.98 (t, *J* = 8.0 Hz, 2H), 2.60 (t, *J* = 8.0 Hz, 2H), 1.89-1.79 (m, 2H), 1.78-1.68 (m, 2H); **<sup>13</sup>C NMR** (101 MHz, CDCl<sub>3</sub>)  $\delta$  161.0, 154.8, 144.0, 133.0, 132.7, 131.8, 129.6, 129.5, 123.5, 113.5, 112.0, 53.6, 40.5, 34.6, 34.1, 31.6, 29.0, 26.5; **HRMS** (ESI) calculated for C<sub>23</sub>H<sub>27</sub>Cl<sub>2</sub>N<sub>3</sub>O [M+H]<sup>+</sup> m/z 432.1604, found 432.1595.

**3-Cyclohexyl-6-methoxy-1-methylquinoxalin-2(1H)-one (26)<sup>[8]</sup>**

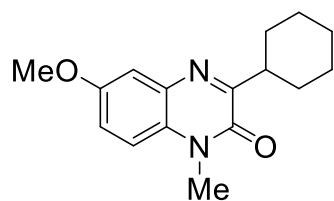

According to **GP1** with 6-methoxy-1-methylquinoxalin-2(1H)-one (38.2 mg, 0.2 mmol, 1.0 equiv), iodocyclohexane (129.3  $\mu$ L, 1.0 mmol, 5.0 equiv), and MTBD (144  $\mu$ L, 1.0 mmol, 5.0 equiv). The crude reaction mixture was purified by flash silica gel column chromatography (petroleum ether/EtOAc = 10:1) to afford the desired product **26** as white solid (39.1 mg, 72%). Mp: 104-106 °C; **<sup>1</sup>H NMR** (400 MHz, CDCl<sub>3</sub>)  $\delta$  7.30 (d, *J* = 2.7 Hz, 1H), 7.19 (d, *J* = 9.1 Hz, 1H), 7.11(dd, *J* = 9.1, 2.7 Hz, 1H), 3.88

(s, 3H), 3.67 (s, 3H), 3.38-3.31 (m, 1H), 1.96 (d,  $J = 12.0$  Hz, 2H), 1.87 (d,  $J = 12.6$  Hz, 2H), 1.77 (d,  $J = 12.6$  Hz, 1H), 1.62-1.41 (m, 4H), 1.37-1.23 (m, 1H);  $^{13}\text{C}$  NMR (75 MHz,  $\text{CDCl}_3$ )  $\delta$  164.8, 155.7, 154.1, 133.5, 127.0, 118.4, 114.3, 111.1, 55.7, 40.7, 30.5, 29.1, 26.2, 26.1; HRMS (ESI) calculated for  $\text{C}_{16}\text{H}_{20}\text{N}_2\text{O}_2$   $[\text{M}+\text{H}]^+$   $m/z$  273.1598, found 273.1597.

### 3-Cyclohexyl-6-fluoro-1-methylquinoxalin-2(1H)-one (27)<sup>[8]</sup>

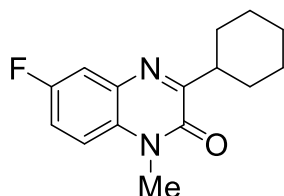

According to **GP1** with 6-fluoro-1-methylquinoxalin-2(1H)-one (35.6 mg, 0.2 mmol, 1.0 equiv), iodocyclohexane (130  $\mu\text{L}$ , 1.0 mmol, 5.0 equiv), and MTBD (144  $\mu\text{L}$ , 1.0 mmol, 5.0 equiv). The crude reaction mixture was purified by flash silica gel column chromatography (petroleum ether/EtOAc = 10:1) to afford the desired product **27** as pale yellow solid (37.0 mg, 71%). Mp: 110-112  $^\circ\text{C}$ ;  $^1\text{H}$  NMR (300 MHz,  $\text{CDCl}_3$ )  $\delta$  7.56-7.49 (m, 1H), 7.28-7.22 (m, 2H), 3.69 (s, 3H), 3.38-3.32 (m, 1H), 1.94 (d,  $J = 11.4$  Hz, 2H), 1.86 (d,  $J = 12.3$  Hz, 2H), 1.77 (d,  $J = 12.3$  Hz, 1H), 1.63-1.41 (m, 4H), 1.37-1.23 (m, 1H);  $^{13}\text{C}$  NMR (75 MHz,  $\text{CDCl}_3$ )  $\delta$  165.8, 160.2, 156.9, 154.1, 133.5 (d,  $J = 11.3\text{Hz}$ ), 129.5 (d,  $J = 2.2\text{Hz}$ ), 117.0 (d,  $J = 24.0\text{Hz}$ ), 115.2 (d,  $J = 21.7\text{Hz}$ ), 114.5 (d,  $J = 8.2\text{Hz}$ ), 40.8, 30.4, 29.2, 26.2, 26.1;  $^{19}\text{F}$  NMR (282 MHz,  $\text{CDCl}_3$ )  $\delta$  -119.51; HRMS (ESI) calculated for  $\text{C}_{15}\text{H}_{17}\text{FN}_2\text{O}$   $[\text{M}+\text{H}]^+$   $m/z$  261.1398, found 261.1407.

### 6-Chloro-3-cyclohexyl-1-methylquinoxalin-2(1H)-one (28)<sup>[8]</sup>

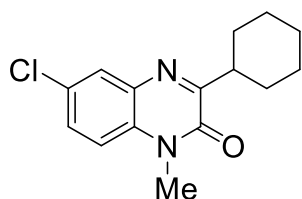

According to **GP1** with 6-chloro-1-methylquinoxalin-2(1H)-one (38.9 mg, 0.2 mmol, 1.0 equiv), iodocyclohexane (130  $\mu\text{L}$ , 1.0 mmol, 5.0 equiv), and MTBD (144  $\mu\text{L}$ , 1.0 mmol, 5.0 equiv). The crude reaction mixture was purified by flash silica gel column chromatography (petroleum ether/EtOAc = 10:1) to afford the desired product **28** as white solid (35.4 mg, 64%). Mp: 124-126  $^\circ\text{C}$ ;  $^1\text{H}$  NMR (300 MHz,  $\text{CDCl}_3$ )  $\delta$  7.83 (d,  $J = 2.4$  Hz, 1H), 7.45 (dd,  $J = 8.9, 2.4$  Hz, 1H), 7.20 (d,  $J = 8.9$  Hz, 1H), 3.68 (s, 3H), 3.37-3.28 (m, 1H), 1.94 (d,  $J = 10.7$  Hz, 2H), 1.86 (d,  $J = 12.1$  Hz, 2H), 1.77 (d,  $J =$

12.1 Hz, 1H), 1.62-1.41 (m, 4H), 1.37-1.23 (m, 1H);  $^{13}\text{C}$  NMR (101 MHz,  $\text{CDCl}_3$ )  $\delta$  165.7, 154.1, 133.4, 131.5, 129.3, 129.1, 128.6, 114.5, 40.8, 30.4, 29.2, 26.2, 26.1; HRMS (ESI) calculated for  $\text{C}_{15}\text{H}_{17}\text{ClN}_2\text{O}$   $[\text{M}+\text{H}]^+$   $m/z$  277.1102, found 277.1099.

### 6-Bromo-3-cyclohexyl-1-methylquinoxalin-2(1H)-one (29)<sup>[5]</sup>

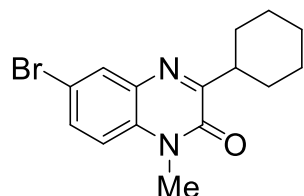

According to **GP1** with 6-bromo-1-methylquinoxalin-2(1H)-one (47.8 mg, 0.2 mmol, 1.0 equiv), iodocyclohexane (130  $\mu\text{L}$ , 1.0 mmol, 5.0 equiv), and MTBD (144  $\mu\text{L}$ , 1.0 mmol, 5.0 equiv). The crude reaction mixture was purified by flash silica gel column chromatography (petroleum ether/EtOAc = 10:1) to afford the desired product **29** as white solid (30.1 mg, 47%). Mp: 118-120  $^\circ\text{C}$ ;  $^1\text{H}$  NMR (400 MHz,  $\text{CDCl}_3$ )  $\delta$  7.73-7.65 (m, 1H), 7.49-7.38 (m, 2H), 3.65 (s, 3H), 3.34-3.27 (m, 1H), 1.94 (d,  $J$  = 12.3 Hz, 2H), 1.86 (d,  $J$  = 12.6 Hz, 2H), 1.76 (d,  $J$  = 12.6 Hz, 1H), 1.60-1.42 (m, 4H), 1.35-1.23 (m, 1H);  $^{13}\text{C}$  NMR (75 MHz,  $\text{CDCl}_3$ )  $\delta$  164.6, 154.1, 133.9, 131.7, 131.0, 126.6, 123.2, 116.5, 40.8, 30.4, 29.2, 26.2, 26.1; HRMS (ESI) calculated for  $\text{C}_{15}\text{H}_{17}\text{BrN}_2\text{O}$   $[\text{M}+\text{H}]^+$   $m/z$  321.0597, found 321.0599.

### 3-Cyclohexyl-7-fluoro-1-methylquinoxalin-2(1H)-one (30)<sup>[5]</sup>

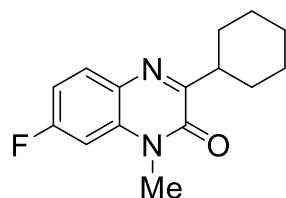

According to **GP1** with 7-fluoro-1-methylquinoxalin-2(1H)-one (35.6 mg, 0.2 mmol, 1.0 equiv), iodocyclohexane (130  $\mu\text{L}$ , 1.0 mmol, 5.0 equiv), and MTBD (144  $\mu\text{L}$ , 1.0 mmol, 5.0 equiv). The crude reaction mixture was purified by flash silica gel column chromatography (petroleum ether/EtOAc = 10:1) to afford the desired product **30** as white solid (26.5 mg, 51%). Mp: 113-115  $^\circ\text{C}$ ;  $^1\text{H}$  NMR (400 MHz,  $\text{CDCl}_3$ )  $\delta$  7.79 (dd,  $J$  = 8.8, 6.0 Hz, 1H), 7.02 (td,  $J$  = 8.8, 2.6 Hz, 1H), 6.96 (dd,  $J$  = 10.1, 2.6 Hz, 1H), 3.65 (s, 3H), 3.33-3.26 (m, 1H), 1.94 (d,  $J$  = 12.5 Hz, 2H), 1.86 (d,  $J$  = 12.6 Hz, 2H), 1.76 (d,  $J$  = 12.6 Hz, 1H), 1.61-1.41 (m, 4H), 1.37-1.23 (m, 1H);  $^{13}\text{C}$  NMR (101 MHz,  $\text{CDCl}_3$ )  $\delta$  164.0, 163.1 (d,  $J$  = 4.0 Hz), 161.5, 154.3, 134.2 (d,  $J$  = 12.1 Hz), 131.5 (d,  $J$  = 2.2 Hz), 129.6 (d,  $J$  = 2.0 Hz), 111.1 (d,  $J$  = 23.2 Hz), 100.4 (d,  $J$  = 27.2 Hz), 40.6,

30.4, 29.2, 26.2, 26.1;  $^{19}\text{F}$  NMR (376 MHz,  $\text{CDCl}_3$ )  $\delta$  -108.73; HRMS (ESI) calculated for  $\text{C}_{15}\text{H}_{17}\text{FN}_2\text{O}$   $[\text{M}+\text{H}]^+$   $m/z$  261.1398, found 261.1399.

### 7-Bromo-3-cyclohexyl-1-methylquinoxalin-2(1H)-one (31)<sup>[5]</sup>

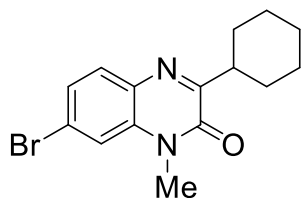

According to **GP1** with 7-bromo-1-methylquinoxalin-2(1H)-one (47.8 mg, 0.2 mmol, 1.0 equiv), iodocyclohexane (130  $\mu\text{L}$ , 1.0 mmol, 5.0 equiv), and MTBD (144  $\mu\text{L}$ , 1.0 mmol, 5.0 equiv). The crude reaction mixture was purified by flash silica gel column chromatography (petroleum ether/EtOAc = 10:1) to afford the desired product **31** as white solid (57.7 mg, 90%). Mp: 120-122  $^{\circ}\text{C}$ ;  $^1\text{H}$  NMR (400 MHz,  $\text{CDCl}_3$ )  $\delta$  7.98 (d,  $J$  = 2.0 Hz, 1H), 7.57 (dd,  $J$  = 8.8, 2.0 Hz, 1H), 7.14 (d,  $J$  = 8.8 Hz, 1H), 3.66 (s, 3H), 3.35-3.29 (m, 1H), 1.93 (d,  $J$  = 11.5 Hz, 2H), 1.85 (d,  $J$  = 12.6 Hz, 2H), 1.76 (d,  $J$  = 12.6 Hz, 1H), 1.61-1.41 (m, 4H), 1.37-1.23 (m, 1H);  $^{13}\text{C}$  NMR (75 MHz,  $\text{CDCl}_3$ )  $\delta$  165.6, 154.1, 133.6, 132.1, 132.0, 131.9, 115.9, 114.8, 40.7, 30.4, 29.1, 26.2, 26.0; HRMS (ESI) calculated for  $\text{C}_{15}\text{H}_{17}\text{BrN}_2\text{O}$   $[\text{M}+\text{H}]^+$   $m/z$  321.0597, found 321.0589.

### 5-Chloro-3-cyclohexyl-1-methylquinoxalin-2(1H)-one (32)

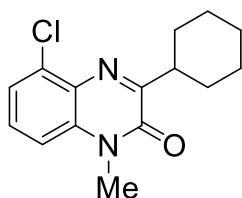

According to **GP1** with 5-chloro-1-methylquinoxalin-2(1H)-one (38.9 mg, 0.2 mmol, 1.0 equiv), iodocyclohexane (130  $\mu\text{L}$ , 1.0 mmol, 5.0 equiv), and MTBD (144  $\mu\text{L}$ , 1.0 mmol, 5.0 equiv). The crude reaction mixture was purified by flash silica gel column chromatography (petroleum ether/EtOAc = 10:1) to afford the desired product **32** as white solid (45.9 mg, 83%). Mp: 126-128  $^{\circ}\text{C}$ ;  $^1\text{H}$  NMR (400 MHz,  $\text{CDCl}_3$ )  $\delta$  7.43-7.35 (m, 2H), 7.21-7.15 (m, 1H), 3.69 (s, 3H), 3.36-3.30 (m, 1H), 1.98 (d,  $J$  = 12.9 Hz, 2H), 1.88 (d,  $J$  = 12.9 Hz, 2H), 1.76 (d,  $J$  = 12.5 Hz, 1H), 1.67-1.58 (m, 2H), 1.54-1.42 (m, 2H), 1.38-1.23 (m, 1H);  $^{13}\text{C}$  NMR (101 MHz,  $\text{CDCl}_3$ )  $\delta$  164.6, 154.1, 134.7, 134.3, 129.4, 129.2, 124.3, 112.3, 41.2, 30.4, 29.4, 26.2, 26.1; HRMS (ESI) calculated for  $\text{C}_{15}\text{H}_{17}\text{ClN}_2\text{O}$   $[\text{M}+\text{H}]^+$   $m/z$  277.1102, found 277.1093.

### 6,7-Dichloro-3-cyclohexyl-1-methylquinoxalin-2(1*H*)-one (33)<sup>[8]</sup>

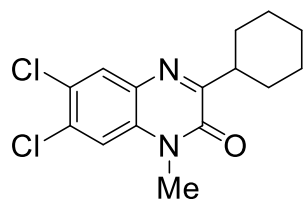

According to **GP1** with 6,7-dichloro-1-methylquinoxalin-2(1*H*)-one (45.8 mg, 0.2 mmol, 1.0 equiv), iodocyclohexane (130  $\mu$ L, 1.0 mmol, 5.0 equiv), and MTBD (144  $\mu$ L, 1.0 mmol, 5.0 equiv). The crude reaction mixture was purified by flash silica gel column chromatography (petroleum ether/EtOAc = 10:1) to afford the desired product **33** as white solid (31.7 mg, 51%). Mp: 127-129  $^{\circ}$ C;  $^1\text{H NMR}$  (400 MHz,  $\text{CDCl}_3$ )  $\delta$  7.92 (s, 1H), 7.36 (s, 1H), 3.65 (s, 3H), 3.34-3.27 (m, 1H), 1.93 (d,  $J = 11.1$  Hz, 2H), 1.86 (d,  $J = 12.6$  Hz, 2H), 1.77 (d,  $J = 12.6$  Hz, 1H), 1.57-1.40 (m, 4H), 1.35-1.23 (m, 1H);  $^{13}\text{C NMR}$  (101 MHz,  $\text{CDCl}_3$ )  $\delta$  165.8, 153.9, 133.3, 132.3, 131.9, 130.6, 127.1, 114.9, 40.8, 30.4, 29.3, 26.2, 26.1; **HRMS** (ESI) calculated for  $\text{C}_{15}\text{H}_{16}\text{Cl}_2\text{N}_2\text{O}$   $[\text{M}+\text{H}]^+$   $m/z$  311.0712, found 311.0718.

### 3-Cyclohexyl-1-propylquinoxalin-2(1*H*)-one (34)<sup>[5]</sup>

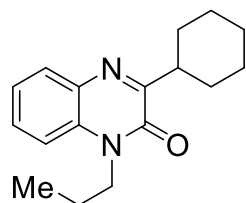

According to **GP1** with 1-propylquinoxalin-2(1*H*)-one (37.8 mg, 0.2 mmol, 1.0 equiv), iodocyclohexane (130  $\mu$ L, 1.0 mmol, 5.0 equiv), and MTBD (144  $\mu$ L, 1.0 mmol, 5.0 equiv). The crude reaction mixture was purified by flash silica gel column chromatography (petroleum ether/EtOAc = 10:1) to afford the desired product **34** as pale yellow oil (41.1 mg, 76%).  $^1\text{H NMR}$  (400 MHz,  $\text{CDCl}_3$ )  $\delta$  7.84 (d,  $J = 7.9$  Hz, 1H), 7.49 (t,  $J = 7.9$  Hz, 1H), 7.35-7.27 (m, 2H), 4.25-4.17 (m, 2H), 3.37-3.30 (m, 1H), 1.96 (d,  $J = 11.7$  Hz, 2H), 1.87 (d,  $J = 12.6$  Hz, 2H), 1.83-1.73 (m, 3H), 1.62-1.43 (m, 4H), 1.35-1.25 (m, 1H), 1.05 (t,  $J = 7.4$  Hz, 3H);  $^{13}\text{C NMR}$  (101 MHz,  $\text{CDCl}_3$ )  $\delta$  164.2, 154.2, 133.1, 132.0, 129.9, 129.2, 123.1, 113.4, 43.7, 40.7, 30.5, 26.3, 26.1, 20.6, 11.4; **HRMS** (ESI) calculated for  $\text{C}_{17}\text{H}_{22}\text{N}_2\text{O}$   $[\text{M}+\text{Na}]^+$   $m/z$  271.1805, found 271.1802.

### 1-Benzyl-3-cyclohexylquinoxalin-2(1H)-one (35)<sup>[12]</sup>

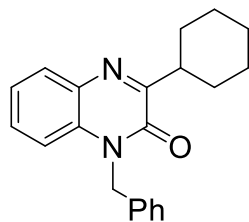

According to **GP1** with 1-benzylquinoxalin-2(1H)-one (47.5 mg, 0.2 mmol, 1.0 equiv), iodocyclohexane (130  $\mu$ L, 1.0 mmol, 5.0 equiv), and MTBD (144  $\mu$ L, 1.0 mmol, 5.0 equiv). The crude reaction mixture was purified by flash silica gel column chromatography (petroleum ether/EtOAc = 10:1) to afford the desired product **35** as whitw solid (61.1 mg, 96%). Mp: 134-136  $^{\circ}$ C; **<sup>1</sup>H NMR** (300 MHz, CDCl<sub>3</sub>)  $\delta$  7.84 (dd,  $J$  = 7.9, 1.5 Hz, 1H), 7.41-7.20 (m, 8H), 5.48 (s, 2H), 3.46-3.34 (m, 1H), 2.01 (d,  $J$  = 12.0 Hz, 2H), 1.88 (d,  $J$  = 12.4 Hz, 2H), 1.82-1.73 (m, 1H), 1.68-1.43 (m, 4H), 1.40-1.28 (m, 1H); **<sup>13</sup>C NMR** (75 MHz, CDCl<sub>3</sub>)  $\delta$  164.3, 154.5, 135.4, 133.1, 132.1, 129.8, 129.3, 128.8, 127.6, 126.9, 123.4, 114.2, 45.9, 40.8, 30.5, 26.3, 26.1; **HRMS** (ESI) calculated for C<sub>21</sub>H<sub>22</sub>N<sub>2</sub>O [M+H]<sup>+</sup>  $m/z$  319.1805, found 319.1803.

### 3-Cyclohexylquinoxalin-2(1H)-one (36)<sup>[12]</sup>

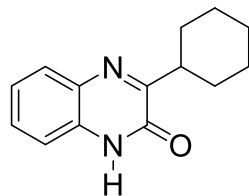

According to **GP1** with quinoxalin-2(1H)-one (29.2 mg, 0.2 mmol, 1.0 equiv), iodocyclohexane (130  $\mu$ L, 1.0 mmol, 5.0 equiv), and MTBD (144  $\mu$ L, 1.0 mmol, 5.0 equiv). The crude reaction mixture was purified by flash silica gel column chromatography (petroleum ether/EtOAc = 3:1) to afford the desired product **36** as white solid (21.1 mg, 46%). Mp: 175-177  $^{\circ}$ C; **<sup>1</sup>H NMR** (400 MHz, *d*<sub>6</sub>-DMSO)  $\delta$  12.32 (s, 1H), 7.70 (d,  $J$  = 9.3 Hz, 1H), 7.46 (t,  $J$  = 8.2 Hz, 1H), 7.30-7.22 (m, 2H), 3.21-3.11 (m, 1H), 1.91-1.75 (m, 4H), 1.71 (d,  $J$  = 12.5 Hz, 1H), 1.50-1.29 (m, 4H), 1.29-1.20 (m, 1H); **<sup>13</sup>C NMR** (75 MHz, *d*<sub>6</sub>-DMSO)  $\delta$  165.3, 154.6, 132.1, 132.0, 129.8, 128.6, 123.5, 115.6, 39.9, 30.5, 26.3, 26.2; **HRMS** (ESI) calculated for C<sub>14</sub>H<sub>16</sub>N<sub>2</sub>O [M+H]<sup>+</sup>  $m/z$  229.1335, found 229.1334.

### 1-Methyl-3-pentyl-5,6-diphenylpyrazin-2(1H)-one (37)

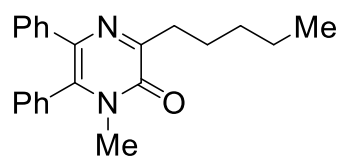

According to **GP1** with 1-methyl-5,6-diphenylpyrazin-2(1H)-one (52.4 mg, 0.2 mmol, 1.0 equiv), 1-iodopentane (132  $\mu$ L, 1.0 mmol, 5.0 equiv), and MTBD (144  $\mu$ L, 1.0 mmol, 5.0 equiv). The crude reaction mixture was purified by flash silica gel column chromatography (petroleum ether/EtOAc = 10:1) to afford the desired product **37** as white solid (13.9 mg, 21%). Mp: 55-57  $^{\circ}$ C;  $^1\text{H NMR}$  (400 MHz,  $\text{CDCl}_3$ )  $\delta$  7.43-7.33 (m, 3H), 7.23-7.17 (m, 2H), 7.17-7.03 (m, 5H), 3.31 (s, 3H), 2.94 (t,  $J$  = 8 Hz, 2H), 1.88-1.76 (m, 2H), 1.50-1.36 (m, 4H), 0.93 (t,  $J$  = 6.9 Hz, 3H);  $^{13}\text{C NMR}$  (101 MHz,  $\text{CDCl}_3$ )  $\delta$  158.1, 155.6, 137.9, 136.1, 132.6, 132.1, 130.0, 129.2, 128.9, 127.6, 126.7, 33.8, 33.7, 31.7, 26.4, 22.5, 14.0; **HRMS** (ESI) calculated for  $\text{C}_{22}\text{H}_{24}\text{N}_2\text{O}$   $[\text{M}+\text{H}]^+$   $m/z$  333.1961, found 333.1960.

### 3-Cyclopentyl-2H-chromen-2-one (38)<sup>[13]</sup>

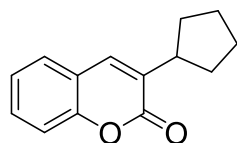

According to **GP2** with 2H-chromen-2-one (29.1 mg, 0.2 mmol, 1.0 equiv), iodocyclopentane (117.7 mg, 0.6 mmol, 3.0 equiv), and MTBD (58  $\mu$ L, 0.4 mmol, 2.0 equiv). The crude reaction mixture was purified by flash silica gel column chromatography (petroleum ether/EtOAc = 30:1) to afford the desired product **38** as white solid (29.8 mg, 70%). Mp: 68-70  $^{\circ}$ C;  $^1\text{H NMR}$  (400 MHz,  $\text{CDCl}_3$ )  $\delta$  7.51-7.40 (m, 3H), 7.30 (d,  $J$  = 8.1 Hz, 1H), 7.24 (t,  $J$  = 7.6 Hz, 1H), 3.20-3.09 (m, 1H), 2.15-2.03 (m, 2H), 1.85-1.68 (m, 4H), 1.64-1.52 (m, 2H);  $^{13}\text{C NMR}$  (101 MHz,  $\text{CDCl}_3$ )  $\delta$  161.7, 152.8, 136.0, 133.4, 130.4, 127.2, 124.1, 119.5, 116.3, 40.7, 31.7, 25.0; **HRMS** (ESI) calculated for  $\text{C}_{14}\text{H}_{14}\text{O}_2$   $[\text{M}+\text{H}]^+$   $m/z$  215.1067, found 215.1065.

### 3-Cyclohexyl-2H-chromen-2-one (39)<sup>[5]</sup>

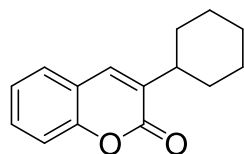

According to **GP2** with 2H-chromen-2-one (29.2 mg, 0.2 mmol, 1.0 equiv),



iodocyclohexane (78  $\mu$ L, 0.6 mmol, 3.0 equiv), and MTBD (58  $\mu$ L, 0.4 mmol, 2.0 equiv). The crude reaction mixture was purified by flash silica gel column chromatography (petroleum ether/EtOAc = 30:1) to afford the desired product **39** as white solid (36.5 mg, 80%). Mp: 93-95  $^{\circ}$ C;  $^1\text{H NMR}$  (400 MHz,  $\text{CDCl}_3$ )  $\delta$  7.48-7.40 (m, 3H), 7.29 (d,  $J$  = 9.6 Hz, 1H), 7.27-7.20 (m, 1H), 2.82-2.70 (m, 1H), 1.98 (d,  $J$  = 11.5 Hz, 2H), 1.90-1.81 (m, 2H), 1.81-1.72 (m, 1H), 1.51-1.37 (m, 2H), 1.36-1.18 (m, 3H);  $^{13}\text{C NMR}$  (75 MHz,  $\text{CDCl}_3$ )  $\delta$  161.5, 152.6, 136.3, 134.7, 130.3, 127.2, 124.1, 119.6, 116.2, 38.1, 32.0, 26.4, 26.1; **HRMS** (ESI) calculated for  $\text{C}_{15}\text{H}_{16}\text{O}_2$   $[\text{M}+\text{H}]^+$   $m/z$  229.1223, found 229.1217.

### 3-Cycloheptyl-2H-chromen-2-one (**40**)<sup>[13]</sup>

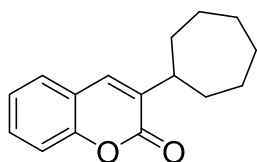

According to **GP2** with 2H-chromen-2-one (29.4 mg, 0.2 mmol, 1.0 equiv), iodocycloheptane (134.5 mg, 0.6 mmol, 3.0 equiv), and MTBD (58  $\mu$ L, 0.4 mmol, 2.0 equiv). The crude reaction mixture was purified by flash silica gel column chromatography (petroleum ether/EtOAc = 30:1) to afford the desired product **40** as white solid (25.7 mg, 53%). Mp: 82-84  $^{\circ}$ C;  $^1\text{H NMR}$  (400 MHz,  $\text{CDCl}_3$ )  $\delta$  7.49-7.39 (m, 3H), 7.28 (d,  $J$  = 8.7 Hz, 1H), 7.26-7.20 (m, 1H), 2.99-2.87 (m, 1H), 2.00-1.89 (m, 2H), 1.85-1.75 (m, 2H), 1.74-1.65 (m, 2H), 1.64-1.51 (m, 6H);  $^{13}\text{C NMR}$  (101 MHz,  $\text{CDCl}_3$ )  $\delta$  161.3, 152.5, 136.2, 136.1, 130.2, 127.1, 124.0, 119.5, 116.1, 40.0, 34.1, 27.6, 26.8; **HRMS** (ESI) calculated for  $\text{C}_{16}\text{H}_{18}\text{O}_2$   $[\text{M}+\text{H}]^+$   $m/z$  243.1380, found 243.1373.

### 3-(Oxetan-3-yl)-2H-chromen-2-one (**41**)

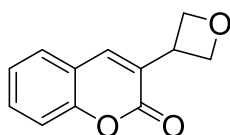

According to **GP2** with 2H-chromen-2-one (29.6 mg, 0.2 mmol, 1.0 equiv), 3-iodooxetane (110.4 mg, 0.6 mmol, 3.0 equiv), and MTBD (58  $\mu$ L, 0.4 mmol, 2.0 equiv). The crude reaction mixture was purified by flash silica gel column chromatography (petroleum ether/EtOAc = 8:1) to afford the desired product **41** as white solid (22.1 mg, 55%). Mp: 98-100  $^{\circ}$ C;  $^1\text{H NMR}$  (400 MHz,  $\text{CDCl}_3$ )  $\delta$  7.69 (s, 1H), 7.52 (t,  $J$  = 7.0 Hz, 2H), 7.32 (dd,  $J$  = 13.9, 7.6 Hz, 2H), 5.12-5.01 (m, 2H), 4.79

(t,  $J = 6.5$  Hz, 2H), 4.37 (p,  $J = 7.5$  Hz, 1H);  $^{13}\text{C}$  NMR (101 MHz,  $\text{CDCl}_3$ )  $\delta$  160.7, 152.9, 137.4, 131.1, 128.5, 127.5, 124.5, 118.8, 116.4, 75.6, 35.3; HRMS (ESI) calculated for  $\text{C}_{12}\text{H}_{10}\text{O}_3$   $[\text{M}+\text{H}]^+$   $m/z$  203.0703, found 203.0697.

### 3-(Tetrahydrofuran-3-yl)-2H-chromen-2-one (**42**)<sup>[13]</sup>

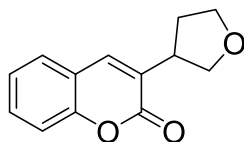

According to **GP2** with 2H-chromen-2-one (29.3 mg, 0.2 mmol, 1.0 equiv), 3-iodotetrahydrofuran (118.8 mg, 0.6 mmol, 3.0 equiv), and MTBD (58  $\mu\text{L}$ , 0.4 mmol, 2.0 equiv). The crude reaction mixture was purified by flash silica gel column chromatography (petroleum ether/EtOAc = 8:1) to afford the desired product **42** as white solid (25.8 mg, 60%). Mp: 106-108  $^{\circ}\text{C}$ ;  $^1\text{H}$  NMR (400 MHz,  $\text{CDCl}_3$ )  $\delta$  7.60 (s, 1H), 7.52-7.45 (m, 2H), 7.34-7.30 (m, 1H), 7.29-7.25 (m, 1H), 4.14-4.07 (m, 1H), 4.06-3.99 (m, 1H), 3.97-3.90 (m, 1H), 3.88-3.82 (m, 1H), 3.64-3.56 (m, 1H), 2.42-2.31 (m, 1H), 2.09-1.99 (m, 1H);  $^{13}\text{C}$  NMR (101 MHz,  $\text{CDCl}_3$ )  $\delta$  161.3, 152.8, 137.2, 130.9, 130.2, 127.4, 124.3, 119.1, 116.2, 72.0, 67.6, 39.3, 31.4; HRMS (ESI) calculated for  $\text{C}_{13}\text{H}_{12}\text{O}_3$   $[\text{M}+\text{Na}]^+$   $m/z$  239.0679, found 239.0674.

### 3-(Tetrahydro-2H-pyran-4-yl)-2H-chromen-2-one (**43**)<sup>[13]</sup>

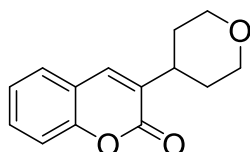

According to **GP2** with 2H-chromen-2-one (29.3 mg, 0.2 mmol, 1.0 equiv), 4-iodotetrahydro-2H-pyran (127.2 mg, 0.6 mmol, 3.0 equiv), and MTBD (58  $\mu\text{L}$ , 0.4 mmol, 2.0 equiv). The crude reaction mixture was purified by flash silica gel column chromatography (petroleum ether/EtOAc = 8:1) to afford the desired product **43** as white solid (27.5 mg, 60%). Mp: 114-116  $^{\circ}\text{C}$ ;  $^1\text{H}$  NMR (400 MHz,  $\text{CDCl}_3$ )  $\delta$  7.52-7.45 (m, 3H), 7.32 (d,  $J = 8.3$  Hz, 1H), 7.30-7.26 (m, 1H), 4.09 (dd,  $J = 11.4, 4.2$  Hz, 2H), 3.58 (td,  $J = 11.9, 1.7$  Hz, 2H), 3.04 (tt,  $J = 12.0, 3.2$  Hz, 1H), 1.94-1.87 (m, 2H), 1.74-1.66 (m, 2H);  $^{13}\text{C}$  NMR (101 MHz,  $\text{CDCl}_3$ )  $\delta$  161.3, 152.8, 136.8, 132.8, 130.8, 127.5, 124.3, 119.4, 116.4, 68.0, 35.5, 31.6; HRMS (ESI) calculated for  $\text{C}_{14}\text{H}_{14}\text{O}_3$   $[\text{M}+\text{Na}]^+$   $m/z$  253.0835, found 253.0826.

***tert*-Butyl 4-(2-oxo-2*H*-chromen-3-yl)piperidine-1-carboxylate (**44**)<sup>[13]</sup>**

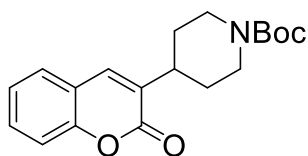

According to **GP2** with 2*H*-chromen-2-one (29.6 mg, 0.2 mmol, 1.0 equiv), *tert*-butyl 4-iodopiperidine-1-carboxylate (186.7 mg, 0.6 mmol, 3.0 equiv), and MTBD (58  $\mu$ L, 0.4 mmol, 2.0 equiv). The crude reaction mixture was purified by flash silica gel column chromatography (petroleum ether/EtOAc = 8:1) to afford the desired product **44** as white solid (30.3 mg, 46%). Mp: 142-144  $^{\circ}$ C; **<sup>1</sup>H NMR** (300 MHz, CDCl<sub>3</sub>)  $\delta$  7.53-7.43 (m, 3H), 7.35-7.30 (m, 1H), 7.28-7.23 (m, 1H), 4.27 (s, 2H), 3.01-2.75 (m, 3H), 2.00-1.91 (m, 2H), 1.61-1.51 (m, 2H), 1.48 (s, 9H); **<sup>13</sup>C NMR** (101 MHz, CDCl<sub>3</sub>)  $\delta$  161.3, 154.7, 152.7, 136.9, 132.8, 130.8, 127.4, 124.3, 119.3, 116.3, 79.5, 44.2, 36.5, 30.7, 28.4; **HRMS** (ESI) calculated for C<sub>19</sub>H<sub>23</sub>NO<sub>4</sub> [M+Na]<sup>+</sup> *m/z* 352.1519, found 352.1520.

**3-(Octan-3-yl)-2*H*-chromen-2-one (**45**)**

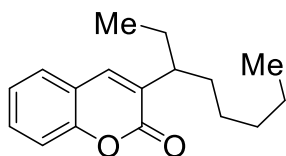

According to **GP2** with 2*H*-chromen-2-one (29.5 mg, 0.2 mmol, 1.0 equiv), 3-iodooctane (115.9 mg, 0.6 mmol, 3.0 equiv), and MTBD (58  $\mu$ L, 0.4 mmol, 2.0 equiv). The crude reaction mixture was purified by flash silica gel column chromatography (petroleum ether/EtOAc = 30:1) to afford the desired product **45** as colorless oil (32.6 mg, 63%). **<sup>1</sup>H NMR** (400 MHz, CDCl<sub>3</sub>)  $\delta$  7.50-7.41 (m, 3H), 7.31 (d, *J* = 8.9 Hz, 1H), 7.28-7.23 (m, 1H), 2.81 (p, *J* = 7.0 Hz, 1H), 1.74-1.59 (m, 4H), 1.33-1.19 (m, 6H), 0.91-0.82 (m, 6H); **<sup>13</sup>C NMR** (101 MHz, CDCl<sub>3</sub>)  $\delta$  161.6, 152.8, 137.9, 132.9, 130.4, 127.2, 124.1, 119.5, 116.3, 41.6, 33.4, 31.9, 26.9, 26.6, 22.5, 14.0, 11.6; **HRMS** (ESI) calculated for C<sub>17</sub>H<sub>22</sub>O<sub>2</sub> [M+H]<sup>+</sup> *m/z* 259.1693, found 259.1686.

**3-((3*r*,5*r*,7*r*)-Adamantan-1-yl)-2*H*-chromen-2-one (**46**)**

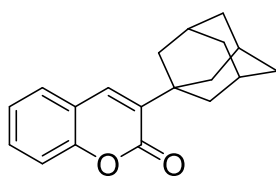

According to **GP2** with *2H*-chromen-2-one (29.3 mg, 0.2 mmol, 1.0 equiv), (3*s*,5*s*,7*s*)-1-iodoadamantane (157.3 mg, 0.6 mmol, 3.0 equiv), and MTBD (58  $\mu$ L, 0.4 mmol, 2.0 equiv). The crude reaction mixture was purified by flash silica gel column chromatography (petroleum ether/EtOAc = 30:1) to afford the desired product **46** as white solid (26.1 mg, 47%). Mp: 184-186  $^{\circ}$ C;  $^1\text{H NMR}$  (400 MHz,  $\text{CDCl}_3$ )  $\delta$  7.52-7.41 (m, 3H), 7.30-7.20 (m, 2H), 2.17-2.04 (m, 9H), 1.82-1.76 (m, 5H), 1.70-1.59 (m, 1H);  $^{13}\text{C NMR}$  (101 MHz,  $\text{CDCl}_3$ )  $\delta$  159.5, 152.9, 137.1, 136.9, 130.4, 127.6, 123.9, 119.5, 115.9, 39.8, 37.1, 36.7, 28.5; **HRMS** (ESI) calculated for  $\text{C}_{19}\text{H}_{20}\text{O}_2$   $[\text{M}+\text{Na}]^+$   $m/z$  303.1356, found 303.1339.

### 3-Pentyl-2*H*-chromen-2-one (**47**)<sup>[14]</sup>

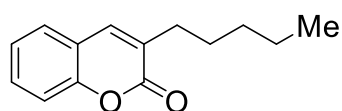

According to **GP2** with *2H*-chromen-2-one (29.3 mg, 0.2 mmol, 1.0 equiv), 1-iodopentane (118.8 mg, 0.6 mmol, 3.0 equiv), and MTBD (58  $\mu$ L, 0.4 mmol, 2.0 equiv). The crude reaction mixture was purified by flash silica gel column chromatography (petroleum ether/EtOAc = 30:1) to afford the desired product **47** as colorless oil (25.8 mg, 60%).  $^1\text{H NMR}$  (400 MHz,  $\text{CDCl}_3$ )  $\delta$  7.52-7.42 (m, 3H), 7.31 (d,  $J = 8.1$  Hz, 1H), 7.27-7.22 (m, 1H), 2.56 (t,  $J = 7.6$  Hz, 2H), 1.65 (p,  $J = 7.4$  Hz, 2H), 1.41-1.32 (m, 4H), 0.96-0.88 (m, 3H);  $^{13}\text{C NMR}$  (101 MHz,  $\text{CDCl}_3$ )  $\delta$  161.8, 153.0, 138.3, 130.4, 130.0, 127.0, 124.2, 119.5, 116.3, 31.4, 30.8, 27.6, 22.4, 14.0; **HRMS** (ESI) calculated for  $\text{C}_{14}\text{H}_{16}\text{O}_2$   $[\text{M}+\text{Na}]^+$   $m/z$  239.1043, found 239.1038.

### 3-(6-Chlorohexyl)-2*H*-chromen-2-one (**48**)

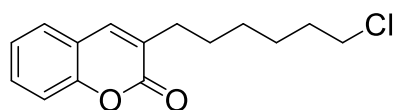

According to **GP2** with *2H*-chromen-2-one (29.2 mg, 0.2 mmol, 1.0 equiv), 1-chloro-6-iodohexane (147.9 mg, 0.6 mmol, 3.0 equiv), and MTBD (58  $\mu$ L, 0.4 mmol, 2.0 equiv). The crude reaction mixture was purified by flash silica gel column chromatography (petroleum ether/EtOAc = 30:1) to afford the desired product **48** as pale yellow solid (27.6 mg, 52%). Mp: 49-51  $^{\circ}$ C;  $^1\text{H NMR}$  (400 MHz,  $\text{CDCl}_3$ )  $\delta$  7.51-7.42 (m, 3H), 7.31 (d,  $J = 8.1$  Hz, 1H), 7.29-7.23 (m, 1H), 3.54 (t,  $J = 6.7$  Hz, 2H), 2.58 (t,  $J = 7.6$  Hz, 2H), 1.79 (p,  $J = 6.7$  Hz, 2H), 1.67 (p,  $J = 7.6$  Hz, 2H), 1.55-1.38 (m, 4H);  $^{13}\text{C NMR}$  (101 MHz,  $\text{CDCl}_3$ )  $\delta$  161.7, 153.0, 138.5, 130.5, 129.7,

127.1, 124.2, 119.5, 116.3, 45.0, 32.4, 30.7, 28.4, 27.8, 26.5; **HRMS** (ESI) calculated for C<sub>15</sub>H<sub>17</sub>ClO<sub>2</sub> [M+H]<sup>+</sup> m/z 265.0990, found 265.0990.

### 3-(Hex-5-yn-1-yl)-2H-chromen-2-one (49)

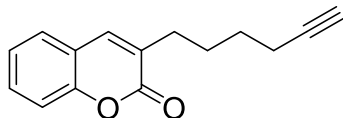

According to **GP2** with 2H-chromen-2-one (29.6 mg, 0.2 mmol, 1.0 equiv), 6-iodohex-1-yne (124.8 mg, 0.6 mmol, 3.0 equiv), and MTBD (58  $\mu$ L, 0.4 mmol, 2.0 equiv). The crude reaction mixture was purified by flash silica gel column chromatography (petroleum ether/EtOAc = 30:1) to afford the desired product **49** as white solid (20.4 mg, 45%). Mp: 70-72 °C; **<sup>1</sup>H NMR** (400 MHz, CDCl<sub>3</sub>)  $\delta$  7.51 (s, 1H), 7.49-7.42 (m, 2H), 7.31 (d, *J* = 8.2 Hz, 1H), 7.26 (t, *J* = 7.3 Hz, 1H), 2.60 (t, *J* = 7.6 Hz, 2H), 2.26 (td, *J* = 6.9, 2.5 Hz, 2H), 1.97 (t, *J* = 2.4 Hz, 1H), 1.79 (p, *J* = 7.5 Hz, 2H), 1.64 (q, *J* = 7.2 Hz, 2H); **<sup>13</sup>C NMR** (101 MHz, CDCl<sub>3</sub>)  $\delta$  161.7, 153.1, 138.5, 130.5, 129.4, 127.1, 124.2, 119.4, 116.4, 84.1, 68.5, 30.3, 27.9, 27.0, 18.2; **HRMS** (ESI) calculated for C<sub>15</sub>H<sub>14</sub>O<sub>2</sub> [M+Na]<sup>+</sup> m/z 249.0886, found 249.0870.

### 3-(Pent-4-en-1-yl)-2H-chromen-2-one (50)<sup>[15]</sup>

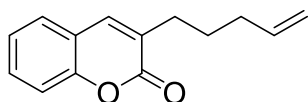

According to **GP2** with 2H-chromen-2-one (29.1 mg, 0.2 mmol, 1.0 equiv), 5-iodopent-1-ene (117.6 mg, 0.6 mmol, 3.0 equiv), and MTBD (58  $\mu$ L, 0.4 mmol, 2.0 equiv). The crude reaction mixture was purified by flash silica gel column chromatography (petroleum ether/EtOAc = 30:1) to afford the desired product **50** as white solid (17.1 mg, 40%). Mp: 46-48 °C; **<sup>1</sup>H NMR** (400 MHz, CDCl<sub>3</sub>)  $\delta$  7.50-7.41 (m, 3H), 7.31 (d, *J* = 8.3 Hz, 1H), 7.28-7.22 (m, 1H), 5.90-5.78 (m, 1H), 5.09-5.03 (m, 1H), 5.02-4.98 (m, 1H), 2.62-2.55 (m, 2H), 2.16 (q, *J* = 7.3 Hz, 2H), 1.76 (p, *J* = 7.5 Hz, 2H); **<sup>13</sup>C NMR** (101 MHz, CDCl<sub>3</sub>)  $\delta$  161.7, 153.1, 138.6, 138.0, 130.5, 129.6, 127.1, 124.2, 119.5, 116.4, 115.1, 33.2, 30.3, 27.1; **HRMS** (ESI) calculated for C<sub>14</sub>H<sub>14</sub>O<sub>2</sub> [M+H]<sup>+</sup> m/z 215.1067, found 215.1066.

### 3-(4,4,4-Trifluorobutyl)-2H-chromen-2-one (51)

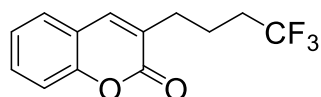

According to **GP2** with 2H-chromen-2-one (29.4 mg, 0.2 mmol, 1.0 equiv), 1,1,1-trifluoro-4-iodobutane (142.8 mg, 0.6 mmol, 3.0 equiv), and MTBD (58  $\mu$ L, 0.4 mmol, 2.0 equiv). The crude reaction mixture was purified by flash silica gel column chromatography (petroleum ether/EtOAc = 30:1) to afford the desired product **51** as white solid (27.2 mg, 53%). Mp: 64-66  $^{\circ}$ C;  $^1\text{H NMR}$  (400 MHz,  $\text{CDCl}_3$ )  $\delta$  7.53 (s, 1H), 7.52-7.43 (m, 2H), 7.32 (d,  $J = 8.3$  Hz, 1H), 7.27 (t,  $J = 7.5$  Hz, 1H), 2.65 (t,  $J = 7.6$  Hz, 2H), 2.19 (dt,  $J = 16.3, 9.0$  Hz, 2H), 1.95 (p,  $J = 7.8$  Hz, 2H);  $^{13}\text{C NMR}$  (101 MHz,  $\text{CDCl}_3$ )  $\delta$  161.5, 153.2, 139.3, 130.9, 128.1, 127.3, 127.0 (q,  $J = 275.0$  Hz), 124.4, 119.2, 116.4, 33.2 (q,  $J = 28.6$  Hz), 29.8, 20.5 (q,  $J = 2.9$  Hz);  $^{19}\text{F NMR}$  (376 MHz,  $\text{CDCl}_3$ )  $\delta$  -66.07; **HRMS** (ESI) calculated for  $\text{C}_{13}\text{H}_{11}\text{F}_3\text{O}_2$   $[\text{M}+\text{Na}]^+$   $m/z$  279.0603, found 279.0612.

### 3-(4-(Trimethylsilyl)butyl)-2H-chromen-2-one (52)

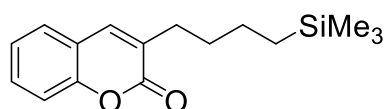

According to **GP2** with 2H-chromen-2-one (29.4 mg, 0.2 mmol, 1.0 equiv), (4-iodobutyl)trimethylsilane (153.7 mg, 0.6 mmol, 3.0 equiv), and MTBD (58  $\mu$ L, 0.4 mmol, 2.0 equiv). The crude reaction mixture was purified by flash silica gel column chromatography (petroleum ether/EtOAc = 30:1) to afford the desired product **52** as white solid (36.8 mg, 67%). Mp: 88-90  $^{\circ}$ C;  $^1\text{H NMR}$  (400 MHz,  $\text{CDCl}_3$ )  $\delta$  7.52-7.40 (m, 3H), 7.30 (d,  $J = 8.3$  Hz, 1H), 7.25 (t,  $J = 7.4$  Hz, 1H), 2.62-2.52 (m, 2H), 1.67 (p,  $J = 7.5$  Hz, 2H), 1.41 (dt,  $J = 15.7, 7.6$  Hz, 2H), 0.60-0.51 (m, 2H), -0.01 (s, 9H);  $^{13}\text{C NMR}$  (101 MHz,  $\text{CDCl}_3$ )  $\delta$  161.8, 153.0, 138.2, 130.3, 130.0, 127.0, 124.1, 119.5, 116.3, 31.8, 30.5, 23.6, 16.4, -1.7; **HRMS** (ESI) calculated for  $\text{C}_{16}\text{H}_{22}\text{O}_2\text{Si}$   $[\text{M}+\text{Na}]^+$   $m/z$  297.1281, found 229.1265.

### 3-Cyclohexyl-7-methyl-2H-chromen-2-one (53)<sup>[16]</sup>

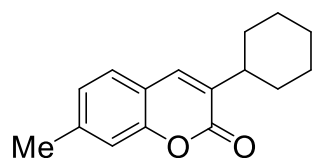

According to **GP2** with 7-methyl-2*H*-chromen-2-one (32.0 mg, 0.2 mmol, 1.0 equiv), iodocyclohexane (78  $\mu$ L, 0.6 mmol, 3.0 equiv), and MTBD (58  $\mu$ L, 0.4 mmol, 2.0 equiv). The crude reaction mixture was purified by flash silica gel column chromatography (petroleum ether/EtOAc = 30:1) to afford the desired product **53** as pale yellow solid (21.3 mg, 44%). Mp: 78-80  $^{\circ}$ C;  $^1\text{H NMR}$  (400 MHz,  $\text{CDCl}_3$ )  $\delta$  7.41 (s, 1H), 7.32 (d,  $J = 7.8$  Hz, 1H), 7.13-7.01 (m, 2H), 2.80-2.70 (m, 1H), 2.43 (s, 3H), 1.97 (d,  $J = 11.8$  Hz, 2H), 1.89-1.73 (m, 3H), 1.51-1.38 (m, 2H), 1.36-1.18 (m, 3H);  $^{13}\text{C NMR}$  (101 MHz,  $\text{CDCl}_3$ )  $\delta$  161.8, 152.8, 141.4, 136.3, 133.6, 126.9, 125.3, 117.2, 116.4, 38.1, 32.1, 26.5, 26.2, 21.6; **HRMS** (ESI) calculated for  $\text{C}_{16}\text{H}_{18}\text{O}_2$   $[\text{M}+\text{H}]^+$   $m/z$  243.1380, found 243.1379.

### 3-Cyclohexyl-7-methoxy-2*H*-chromen-2-one (**54**)<sup>[13]</sup>

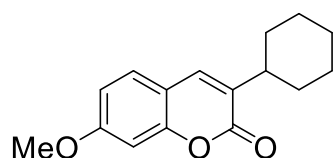

According to **GP2** with 7-methoxy-2*H*-chromen-2-one (35.2 mg, 0.2 mmol, 1.0 equiv), iodocyclohexane (78  $\mu$ L, 0.6 mmol, 3.0 equiv), and MTBD (58  $\mu$ L, 0.4 mmol, 2.0 equiv). The crude reaction mixture was purified by flash silica gel column chromatography (petroleum ether/EtOAc = 30:1) to afford the desired product **54** as white solid (33.5 mg, 65%). Mp: 103-105  $^{\circ}$ C;  $^1\text{H NMR}$  (400 MHz,  $\text{CDCl}_3$ )  $\delta$  7.39 (s, 1H), 7.33 (d,  $J = 8.5$  Hz, 1H), 6.84-6.77 (m, 2H), 3.85 (s, 3H), 2.78-2.68 (m, 1H), 1.96 (d,  $J = 11.5$  Hz, 2H), 1.88-1.72 (m, 3H), 1.50-1.37 (m, 2H), 1.34-1.20 (m, 3H);  $^{13}\text{C NMR}$  (101 MHz,  $\text{CDCl}_3$ )  $\delta$  161.8, 161.7, 154.3, 136.4, 131.3, 128.1, 113.3, 112.2, 100.3, 55.6, 38.0, 32.1, 26.5, 26.1; **HRMS** (ESI) calculated for  $\text{C}_{16}\text{H}_{18}\text{O}_3$   $[\text{M}+\text{H}]^+$   $m/z$  259.1329, found 259.1321.

### 3-Cyclohexyl-7-fluoro-2*H*-chromen-2-one (**55**)

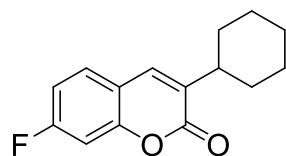

According to **GP2** with 7-fluoro-2*H*-chromen-2-one (32.9 mg, 0.2 mmol, 1.0 equiv), iodocyclohexane (78  $\mu$ L, 0.6 mmol, 3.0 equiv), and MTBD (58  $\mu$ L, 0.4 mmol, 2.0 equiv). The crude reaction mixture was purified by flash silica gel column chromatography (petroleum ether/EtOAc = 30:1) to afford the desired product **55** as white solid (36.8 mg, 75%). Mp: 132-134  $^{\circ}$ C;  $^1\text{H NMR}$  (400 MHz,  $\text{CDCl}_3$ )  $\delta$

7.46-7.38 (m, 2H), 7.05-6.95 (m, 2H), 2.80-2.70 (m, 1H), 1.97 (d,  $J = 12.8$  Hz, 2H), 1.90-1.73 (m, 3H), 1.51-1.38 (m, 2H), 1.36-1.18 (m, 3H);  $^{13}\text{C}$  NMR (101 MHz,  $\text{CDCl}_3$ )  $\delta$  164.8, 162.3, 161.1, 153.7 (d,  $J = 12.9$  Hz), 135.79 (d,  $J = 1.1$  Hz), 133.6 (d,  $J = 3.1$  Hz), 128.7 (d,  $J = 10.2$  Hz), 116.3 (d,  $J = 2.8$  Hz), 112.2 (d,  $J = 22.9$  Hz), 103.9 (d,  $J = 25.6$  Hz), 38.1, 32.0, 26.5, 26.1;  $^{19}\text{F}$  NMR (282 MHz,  $\text{CDCl}_3$ )  $\delta$  -107.34; HRMS (ESI) calculated for  $\text{C}_{15}\text{H}_{15}\text{FO}_2$   $[\text{M}+\text{H}]^+$   $m/z$  247.1129, found 247.1128.

### 7-Chloro-3-cyclohexyl-2H-chromen-2-one (56)<sup>[13]</sup>

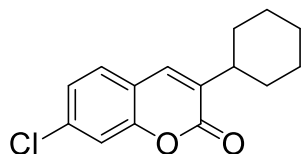

According to **GP2** with 7-chloro-2H-chromen-2-one (36.3 mg, 0.2 mmol, 1.0 equiv), iodocyclohexane (78  $\mu\text{L}$ , 0.6 mmol, 3.0 equiv), and MTBD (58  $\mu\text{L}$ , 0.4 mmol, 2.0 equiv). The crude reaction mixture was purified by flash silica gel column chromatography (petroleum ether/EtOAc = 30:1) to afford the desired product **56** as white solid (28.8 mg, 55%). Mp: 142-144  $^\circ\text{C}$ ;  $^1\text{H}$  NMR (400 MHz,  $\text{CDCl}_3$ )  $\delta$  7.45-7.35 (m, 2H), 7.29 (d,  $J = 2$  Hz, 1H), 7.22 (dd,  $J = 8.3, 2.0$  Hz, 1H), 2.80-2.69 (m, 1H), 1.97 (d,  $J = 11.8$  Hz, 2H), 1.90-1.73 (m, 3H), 1.51-1.38 (m, 2H), 1.36-1.18 (m, 3H);  $^{13}\text{C}$  NMR (101 MHz,  $\text{CDCl}_3$ )  $\delta$  160.8, 152.9, 136.1, 135.5, 134.9, 128.1, 124.7, 118.2, 116.5, 38.2, 32.0, 26.4, 26.0; HRMS (ESI) calculated for  $\text{C}_{15}\text{H}_{15}\text{ClO}_2$   $[\text{M}+\text{H}]^+$   $m/z$  263.0833, found 263.0826.

### 3-Cyclohexyl-6-methoxy-2H-chromen-2-one (57)

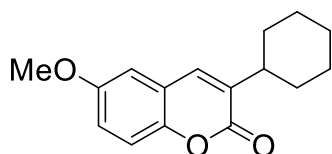

According to **GP2** with 6-methoxy-2H-chromen-2-one (35.2 mg, 0.2 mmol, 1.0 equiv), iodocyclohexane (78  $\mu\text{L}$ , 0.6 mmol, 3.0 equiv), and MTBD (58  $\mu\text{L}$ , 0.4 mmol, 2.0 equiv). The crude reaction mixture was purified by flash silica gel column chromatography (petroleum ether/EtOAc = 30:1) to afford the desired product **57** as white solid (22.5 mg, 44%). Mp: 87-89  $^\circ\text{C}$ ;  $^1\text{H}$  NMR (300 MHz,  $\text{CDCl}_3$ )  $\delta$  7.40 (s, 1H), 7.23 (d,  $J = 9.0$  Hz, 1H), 7.03 (dd,  $J = 9.0, 2.9$  Hz, 1H), 6.89 (d,  $J = 2.9$  Hz, 1H), 3.84 (s, 3H), 2.80-2.69 (m, 1H), 2.04-1.92 (m, 2H), 1.90-1.73 (m, 3H), 1.54-1.21 (m, 5H);  $^{13}\text{C}$  NMR (101 MHz,  $\text{CDCl}_3$ )  $\delta$  161.7, 155.9, 147.1, 136.1, 135.2, 120.0, 118.0, 117.3, 109.6, 55.8, 38.2, 32.1, 26.5, 26.2; HRMS (ESI) calculated for  $\text{C}_{16}\text{H}_{18}\text{O}_3$



[M+H]<sup>+</sup> m/z 259.1329, found 259.1323.

### 3-Cyclohexyl-7-(diethylamino)-4-methyl-2H-chromen-2-one (**58**)<sup>[13]</sup>

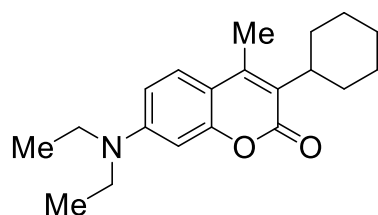

According to **GP2** with 7-(diethylamino)-4-methyl-2H-chromen-2-one (46.3 mg, 0.2 mmol, 1.0 equiv), iodocyclohexane (78  $\mu$ L, 0.6 mmol, 3.0 equiv), and MTBD (58  $\mu$ L, 0.4 mmol, 2.0 equiv). The crude reaction mixture was purified by flash silica gel column chromatography (petroleum ether/EtOAc = 30:1) to afford the desired product **58** as yellow solid (23.2 mg, 37%). Mp: 95-97  $^{\circ}$ C; <sup>1</sup>H NMR (400 MHz, CDCl<sub>3</sub>)  $\delta$  7.40 (d,  $J$  = 9.0 Hz, 1H), 6.57 (dd,  $J$  = 9.0, 2.6 Hz, 1H), 6.47 (d,  $J$  = 2.6 Hz, 1H), 3.39 (q,  $J$  = 7.1 Hz, 4H), 2.82 (s, 1H), 2.36 (s, 3H), 2.17 (q,  $J$  = 11.4, 10.6 Hz, 2H), 1.82 (d,  $J$  = 9.2 Hz, 2H), 1.77-1.61 (m, 2H), 1.54 (d,  $J$  = 12.5 Hz, 2H), 1.34 (d,  $J$  = 7.2 Hz, 2H), 1.19 (t,  $J$  = 7.1 Hz, 6H); <sup>13</sup>C NMR (101 MHz, CDCl<sub>3</sub>)  $\delta$  161.3, 154.5, 149.3, 146.1, 125.6, 124.1, 109.8, 108.2, 97.3, 44.6, 39.4, 29.4, 27.1, 25.8, 14.6, 12.4; HRMS (ESI) calculated for C<sub>20</sub>H<sub>27</sub>NO<sub>2</sub> [M+Na]<sup>+</sup> m/z 336.1934, found 336.1950.

### Evaluation of other substrates:

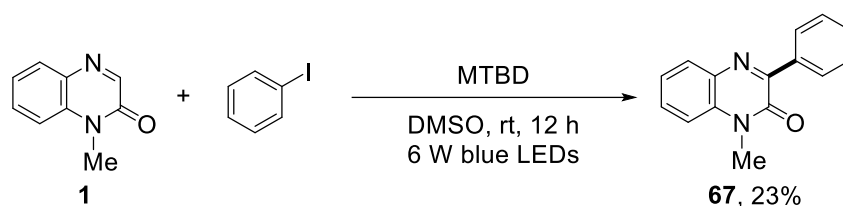

1-Methylquinoxalin-2(1H)-one (32.5 mg, 0.2 mmol, 1.0 equiv), iodobenzene (112  $\mu$ L, 1.0 mmol, 5.0 equiv), and MTBD (144  $\mu$ L, 1.0 mmol, 5.0 equiv) were placed in a dry 10 mL Schlenk tube under a nitrogen atmosphere. Then anhydrous DMSO (2.0 mL) was added with a syringe. The reaction mixture was stirred and irradiated with 6 W blue LEDs at room temperature for 12 h. The crude reaction mixture was purified by flash silica gel column chromatography (petroleum ether/EtOAc = 10:1) to afford the desired product **67** (11.0 mg, 23%).

**1-Methyl-3-phenylquinoxalin-2(1H)-one (67)** <sup>[17]</sup>: white solid; Mp: 90-92  $^{\circ}$ C; <sup>1</sup>H NMR (400 MHz, CDCl<sub>3</sub>)  $\delta$  8.31 (s, 2H), 7.94 (d,  $J$  = 7.8 Hz, 1H), 7.55 (t,  $J$  = 7.6 Hz,

1H), 7.48 (s, 3H), 7.40-7.29 (m, 2H), 3.76 (s, 3H); <sup>13</sup>C NMR (101 MHz, CDCl<sub>3</sub>) δ 154.7, 154.1, 136.0, 133.3, 133.0, 130.4, 130.3, 129.5, 128.0, 123.7, 113.5, 29.3; HRMS (ESI) calculated for C<sub>15</sub>H<sub>12</sub>N<sub>2</sub>O [M+H]<sup>+</sup> m/z 237.1022, found 237.1032.

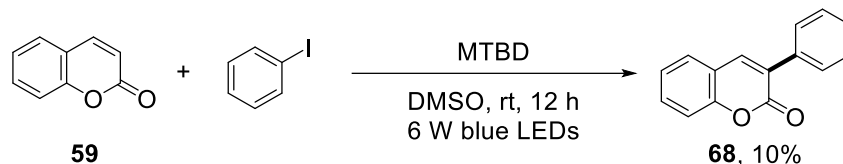

2H-Chromen-2-one (29.4 mg, 0.2 mmol, 1.0 equiv), iodobenzene (68 μL, 0.6 mmol, 3.0 equiv), and MTBD (58 μL, 0.4 mmol, 2.0 equiv) were placed in a dry 10 mL Schlenk tube under a nitrogen atmosphere. Then anhydrous DMSO (2.0 mL) was added with a syringe. The reaction mixture was stirred and irradiated with 6 W blue LEDs at room temperature for 12 h. The crude reaction mixture was purified by flash silica gel column chromatography (petroleum ether/EtOAc = 30:1) to afford the desired product **68** (4.5 mg, 10%).

**3-Phenyl-2H-chromen-2-one (68)**<sup>[18]</sup>: white solid; Mp: 134-136 °C; <sup>1</sup>H NMR (400 MHz, CDCl<sub>3</sub>) δ 7.82 (s, 1H), 7.71 (d, *J* = 6.9 Hz, 2H), 7.53 (t, *J* = 8.1 Hz, 2H), 7.49-7.40 (m, 3H), 7.37 (d, *J* = 8.2 Hz, 1H), 7.30 (t, *J* = 7.5 Hz, 1H); <sup>13</sup>C NMR (101 MHz, CDCl<sub>3</sub>) δ 160.6, 153.5, 139.8, 134.7, 131.4, 128.8, 128.5, 128.5, 128.4, 127.9, 124.5, 119.7, 116.4; HRMS (ESI) calculated for C<sub>15</sub>H<sub>10</sub>O<sub>2</sub> [M+H]<sup>+</sup> m/z 223.0754, found 223.0759.

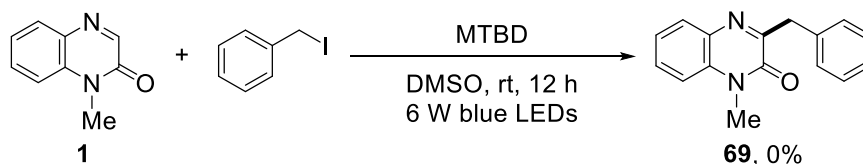

1-Methylquinoxalin-2(1H)-one (32.3 mg, 0.2 mmol, 1.0 equiv), (iodomethyl)benzene (124 μL, 1.0 mmol, 5.0 equiv), and MTBD (144 μL, 1.0 mmol, 5.0 equiv) were placed in a dry 10 mL Schlenk tube under a nitrogen atmosphere. Then anhydrous DMSO (2.0 mL) was added with a syringe. The reaction mixture was stirred and irradiated with 6 W blue LEDs at room temperature for 12 h. This reaction did not afford any targeted product, and the starting heterocycles were completely recovered.

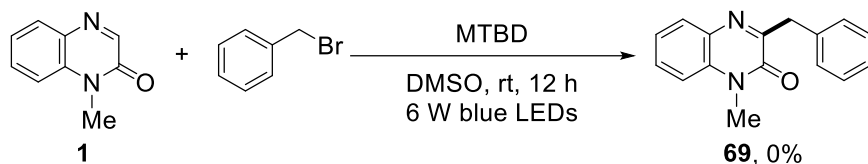

1-Methylquinoxalin-2(1H)-one (32.5 mg, 0.2 mmol, 1.0 equiv), (bromomethyl)benzene (118  $\mu$ L, 1.0 mmol, 5.0 equiv), and MTBD (144  $\mu$ L, 1.0 mmol, 5.0 equiv) were placed in a dry 10 mL Schlenk tube under a nitrogen atmosphere. Then anhydrous DMSO (2.0 mL) was added with a syringe. The reaction mixture was stirred and irradiated with 6 W blue LEDs at room temperature for 12 h. This reaction did not afford any targeted product, and the starting heterocycles were completely recovered.

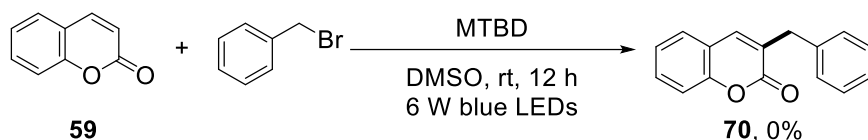

2H-Chromen-2-one (29.5 mg, 0.2 mmol, 1.0 equiv), (bromomethyl)benzene (72  $\mu$ L, 0.6 mmol, 3.0 equiv), and MTBD (58  $\mu$ L, 0.4 mmol, 2.0 equiv) were placed in a dry 10 mL Schlenk tube under a nitrogen atmosphere. Then anhydrous DMSO (2.0 mL) was added with a syringe. The reaction mixture was stirred and irradiated with 6 W blue LEDs at room temperature for 12 h. This reaction did not afford any targeted product, and the starting heterocycles were completely recovered.

### *Larger scale experiments:*

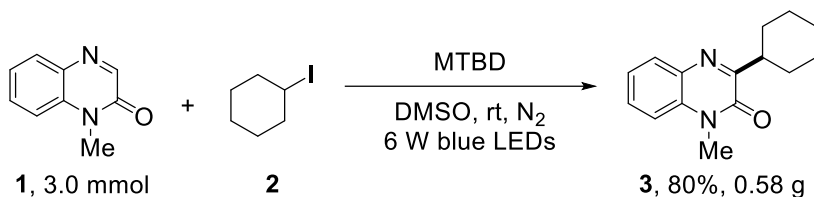

1-Methylquinoxalin-2(1H)-one (480.5 mg, 3.0 mmol, 1.0 equiv), iodocyclohexane (1940  $\mu$ L, 15.0 mmol, 5.0 equiv), and MTBD (2154  $\mu$ L, 15.0 mmol, 5.0 equiv) were placed in a dry 25 mL Schlenk tube under a nitrogen atmosphere. Then anhydrous DMSO (5.0 mL) was added with a syringe. The reaction mixture was stirred and irradiated with 6 W blue LEDs at room temperature for 12 h. The crude reaction mixture was purified by flash silica gel column chromatography (petroleum ether/EtOAc = 10:1) to afford the desired product **3** (0.58 g, 80%).

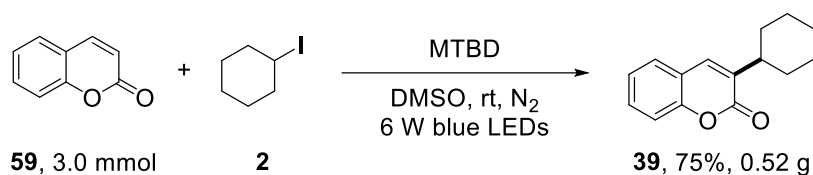

2*H*-Chromen-2-one (438.4 mg, 3.0 mmol, 1.0 equiv), iodocyclohexane (1164  $\mu$ L, 9.0 mmol, 3.0 equiv), and MTBD (862  $\mu$ L, 6.0 mmol, 2.0 equiv) were placed in a dry 25 mL Schlenk tube under a nitrogen atmosphere. Then anhydrous DMSO (5.0 mL) was added with a syringe. The reaction mixture was stirred and irradiated with 6 W blue LEDs at room temperature for 12 h. The crude reaction mixture was purified by flash silica gel column chromatography (petroleum ether/EtOAc = 30:1) to afford the desired product **39** (0.52 g, 75%).

## Mechanistic studies

### 1) Radical inhibition and trapping experiments:

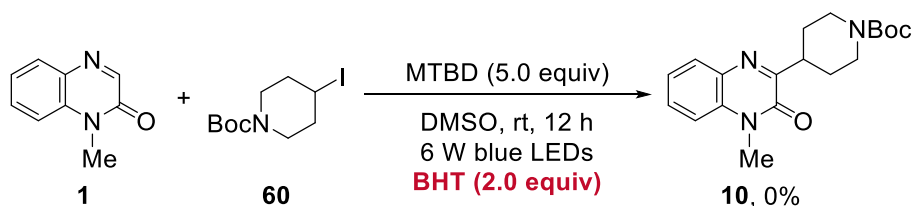

1-Methylquinoxalin-2(1*H*)-one (32.5 mg, 0.2 mmol, 1.0 equiv), *tert*-butyl 4-iodopiperidine-1-carboxylate (311.1 mg, 1.0 mmol, 5.0 equiv), MTBD (144  $\mu$ L, 1.0 mmol, 5.0 equiv), and 2,6-di-*tert*-butyl-4-methylphenol (BHT) (88.1 mg, 0.4 mmol, 2.0 equiv) were placed in a 10 mL Schlenk tube under N<sub>2</sub>. Then DMSO (2.0 mL) was added with a syringe. The reaction mixture was stirred and irradiated by using 6 W blue LEDs at room temperature for 12 h. In this reaction, the formation of **10** was completely suppressed.

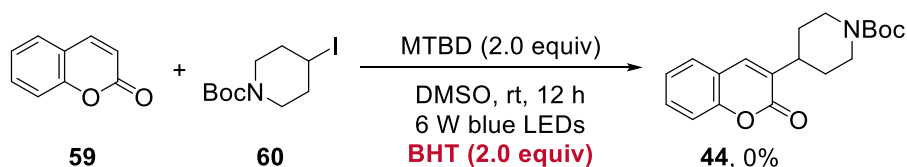

2*H*-Chromen-2-one (29.4 mg, 0.2 mmol, 1.0 equiv), *tert*-butyl 4-iodopiperidine-1-carboxylate (186.7 mg, 0.6 mmol, 3.0 equiv), MTBD (58  $\mu$ L, 0.4 mmol, 2.0 equiv), and 2,6-di-*tert*-butyl-4-methylphenol (BHT) (88.4 mg, 0.4 mmol,



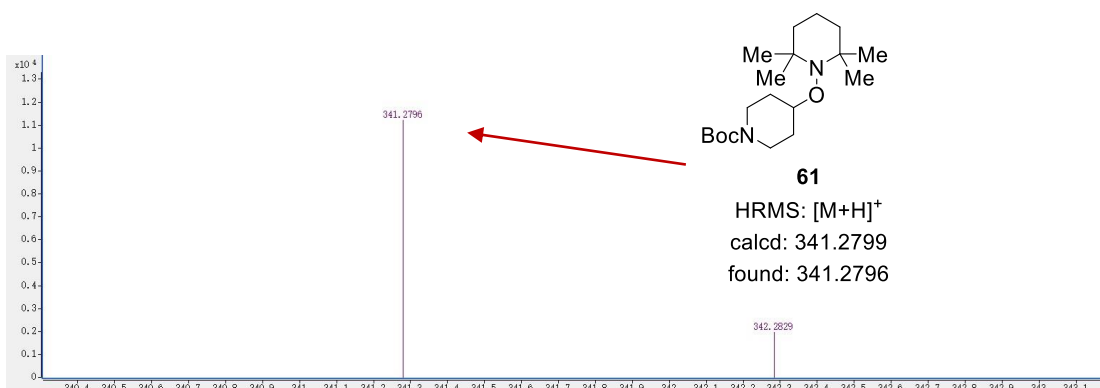

## 2) Radical clock experiments:

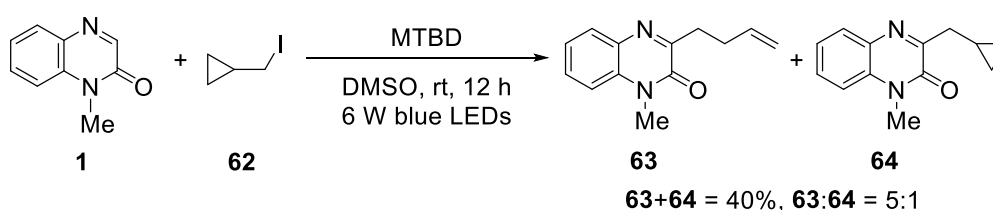

1-Methylquinoxalin-2(1*H*)-one (32.5 mg, 0.2 mmol, 1.0 equiv), (iodomethyl)cyclopropane (182.0 mg, 1.0 mmol, 5.0 equiv), and MTBD (144  $\mu$ L, 1.0 mmol, 5.0 equiv) were placed in a 10 mL Schlenk tube under N<sub>2</sub>. Then DMSO (2.0 mL) was added with a syringe. The reaction mixture was irradiated with 6 W blue LEDs at room temperature under N<sub>2</sub> for 12 h. After completion of the reaction, the solvent was removed under reduced pressure, and the residue was purified by flash silica gel column chromatography (petroleum ether/EtOAc = 10/1) to afford a mixture of **63** and **64** (17.0 mg, 40%, **63:64** = 5:1).

**3-(But-3-en-1-yl)-1-methylquinoxalin-2(1*H*)-one (63):** <sup>1</sup>H NMR (300 MHz, CDCl<sub>3</sub>)  $\delta$  7.83 (dd, *J* = 7.9, 1.2 Hz, 1H), 7.57-7.47 (m, 1H), 7.38-7.26 (m, 2H), 6.04-5.88 (m, 1H), 5.11 (dd, *J* = 17.1, 1.6 Hz, 1H), 5.00 (d, *J* = 10.2 Hz, 1H), 3.69 (s, 3H), 3.05 (dd, *J* = 8.7, 6.7 Hz, 2H), 2.64-2.52 (m, 2H); <sup>13</sup>C NMR (75 MHz, CDCl<sub>3</sub>)  $\delta$  160.2, 154.7, 137.6, 133.1, 132.7, 129.6, 129.6, 123.4, 115.1, 113.5, 33.4, 30.5, 28.9; **HRMS** (ESI) calculated for C<sub>13</sub>H<sub>14</sub>N<sub>2</sub>O [M+H]<sup>+</sup> *m/z* 215.1179, found 215.1180.

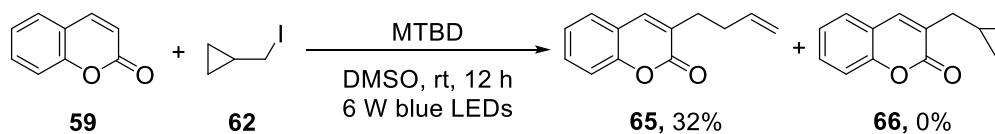

2*H*-Chromen-2-one (29.5 mg, 0.2 mmol, 1.0 equiv), (iodomethyl)cyclopropane (109.3 mg, 0.6 mmol, 3.0 equiv), and MTBD (58  $\mu$ L, 0.4 mmol, 2.0 equiv) were placed in a

10 mL Schlenk tube under N<sub>2</sub>. Then DMSO (2.0 mL) was added with a syringe. The reaction mixture was stirred and irradiated by using 6 W blue LEDs at room temperature for 12 h. After completion of the reaction, the solvent was removed under reduced pressure, and the residue was purified by flash silica gel column chromatography (petroleum ether/EtOAc = 30/1) to afford the ring-opening product **65** as white solid (12.8 mg, 32%).

**3-(But-3-en-1-yl)-2H-chromen-2-one (65)**: white solid; Mp: 52-54 °C; <sup>1</sup>H NMR (400 MHz, CDCl<sub>3</sub>) δ 7.52-7.42 (m, 3H), 7.31 (d, *J* = 8.2 Hz, 1H), 7.27-7.22 (m, 1H), 5.92-5.77 (m, 1H), 5.12-4.99 (m, 2H), 2.68 (t, *J* = 7.4 Hz, 2H), 2.47-2.39 (m, 2H); <sup>13</sup>C NMR (101 MHz, CDCl<sub>3</sub>) δ 161.7, 153.1, 138.9, 137.1, 130.6, 129.0, 127.2, 124.2, 119.4, 116.4, 115.8, 31.9, 30.2; HRMS (ESI) calculated for C<sub>13</sub>H<sub>12</sub>O<sub>2</sub> [M+H]<sup>+</sup> *m/z* 201.0910, found 201.0901.

### 3) UV-vis spectroscopic measurements:

We investigated whether the EDA complexes could be formed in the current reaction. The UV-vis experiments were performed on Agilent Cary 100 UV-visible spectrophotometer with a quartz cuvette (10 mm path length). We observed that after mixing of 1-methylquinoxalin-2(1*H*)-one **1**, 2*H*-chromen-2-one **59**, iodocyclohexane **2**, and MTBD in DMSO, the optical absorption spectrum did not show a red-shift. On the basis of these observations, we supposed that EDA complex was unlikely responsible for generating radical intermediates in the current reaction system.

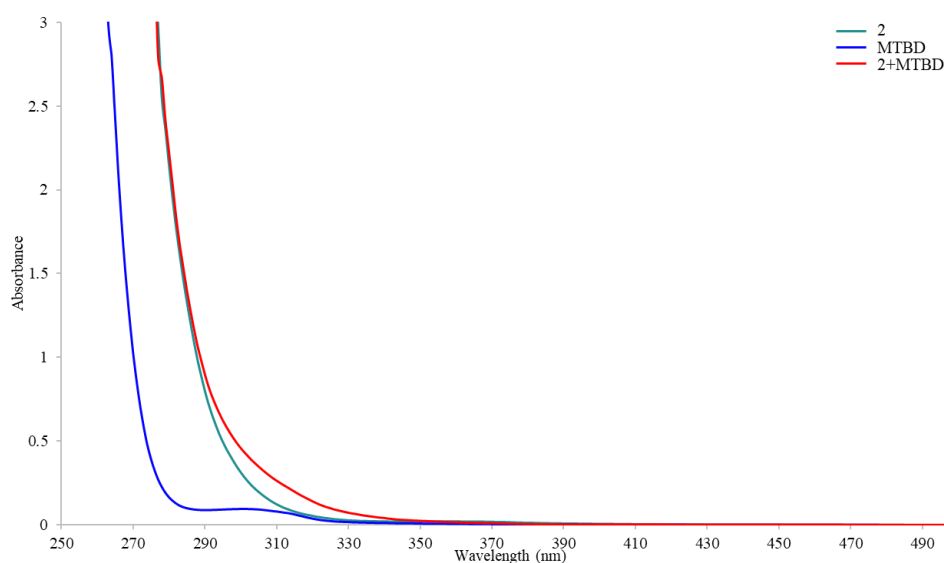

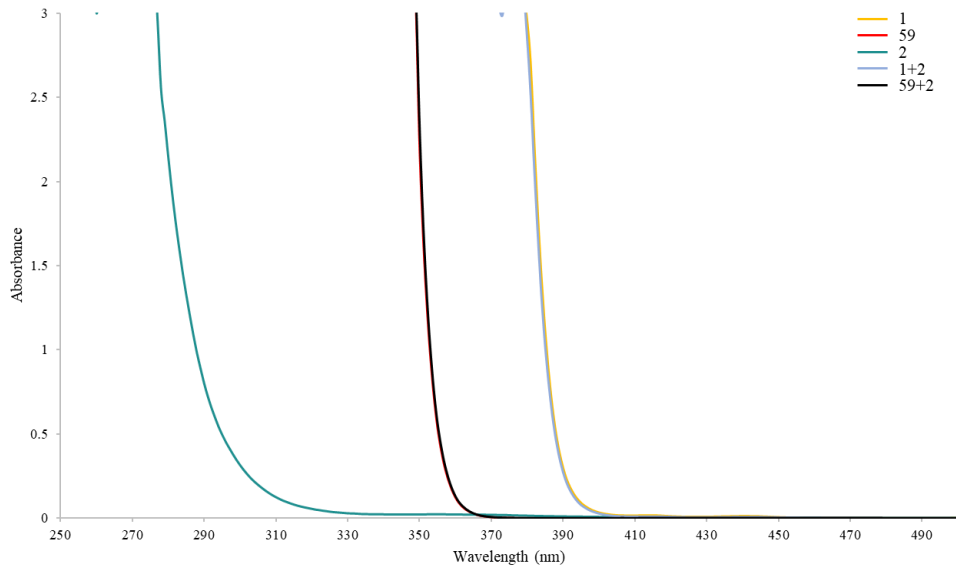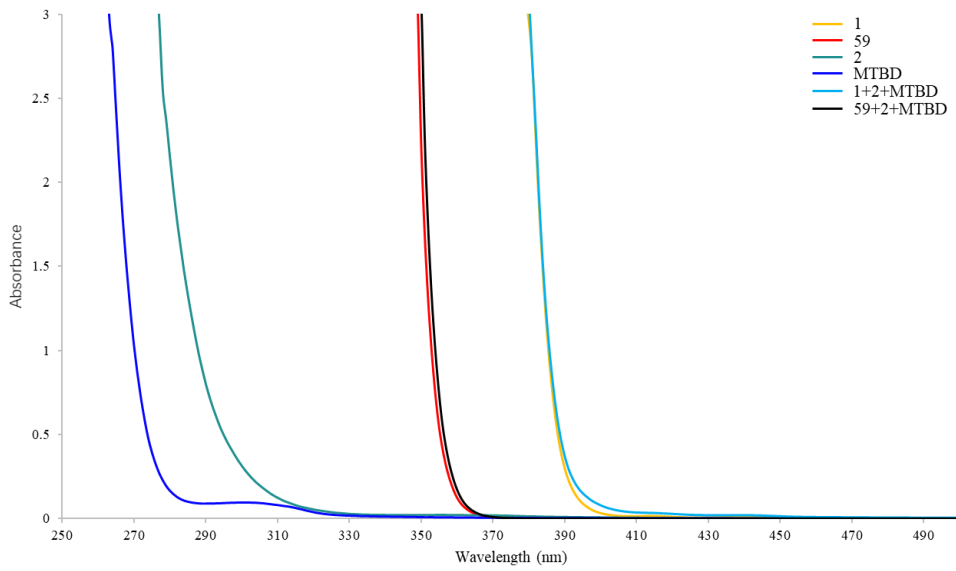



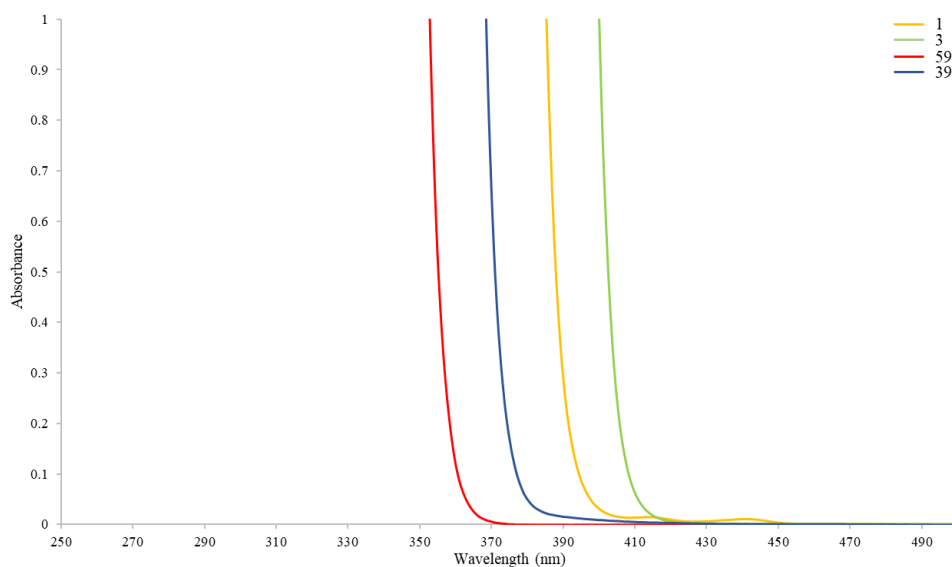

#### 4) Stern-Volmer fluorescence quenching experiments

Emission intensities were recorded using a spectrofluorimeter. All solutions were excited at 414 nm and the emission intensity at 478 nm was observed. DMSO was degassed with a stream of argon for 15 min. In a typical experiment, 2.0 mL of solution of **1** (1.0 mM) in DMSO was added to the appropriate amount of iodocyclohexane and MTBD respectively in a screw-top 1.0 cm quartz cuvette and the emission spectra of the sample was collected.

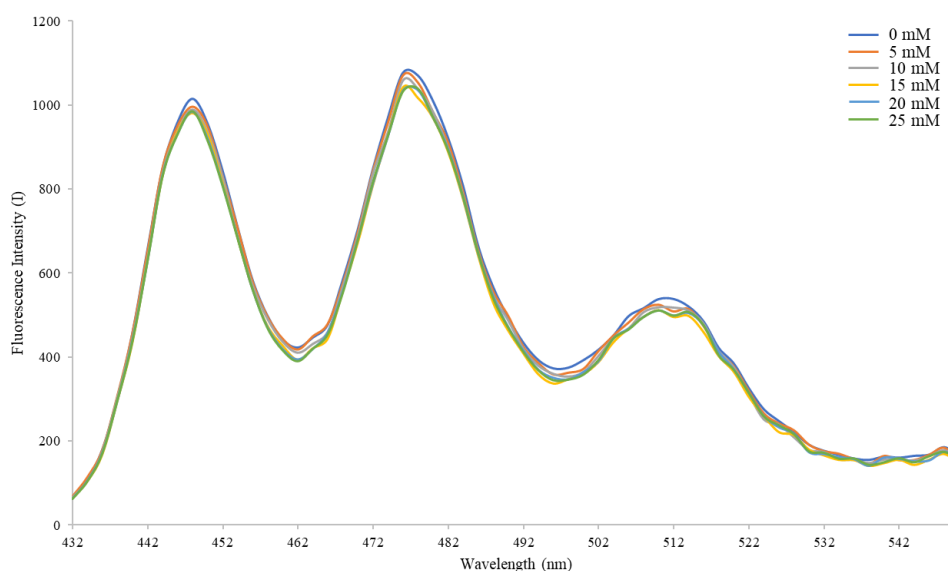

The fluorescence emission spectra of **1** with different concentration of iodocyclohexane **2** excited at 414 nm

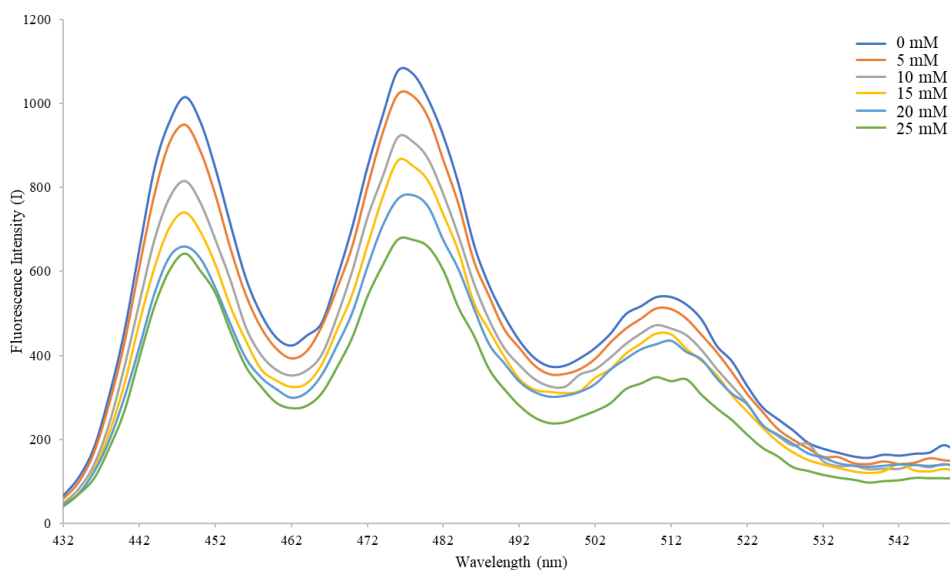

The fluorescence emission spectra of **1** with different concentration of MTBD excited at 414 nm

All solutions were excited at 360 nm and the emission intensity at 420 nm was observed. DMSO was degassed with a stream of argon for 15 min. In a typical experiment, 2.0 mL of solution of **59** (1.0 mM) in DMSO was added to the appropriate amount of iodocyclohexane and MTBD respectively in a screw-top 1.0 cm quartz cuvette and the emission spectra of the sample was collected.

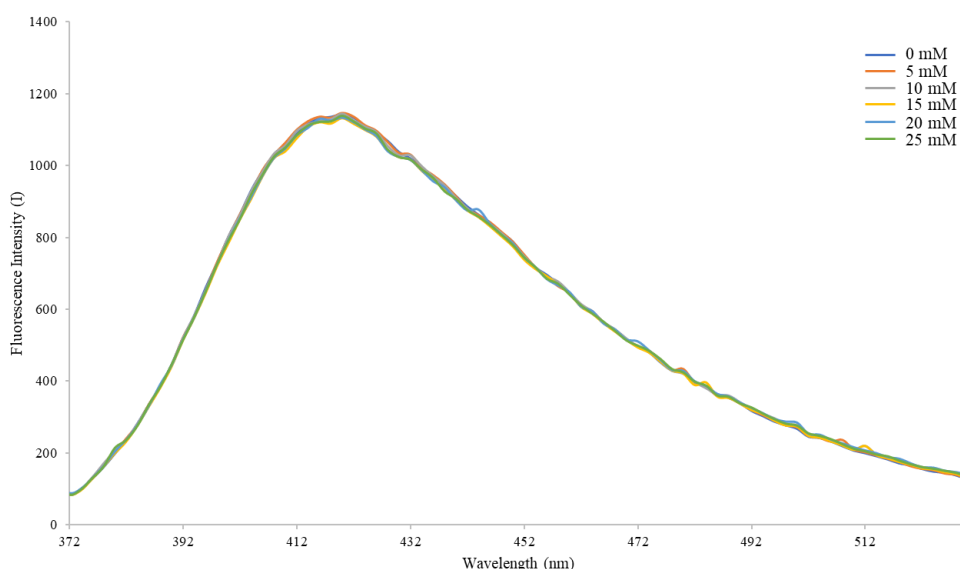

The fluorescence emission spectra of **59** with different concentration of iodocyclohexane **2** excited at 360 nm

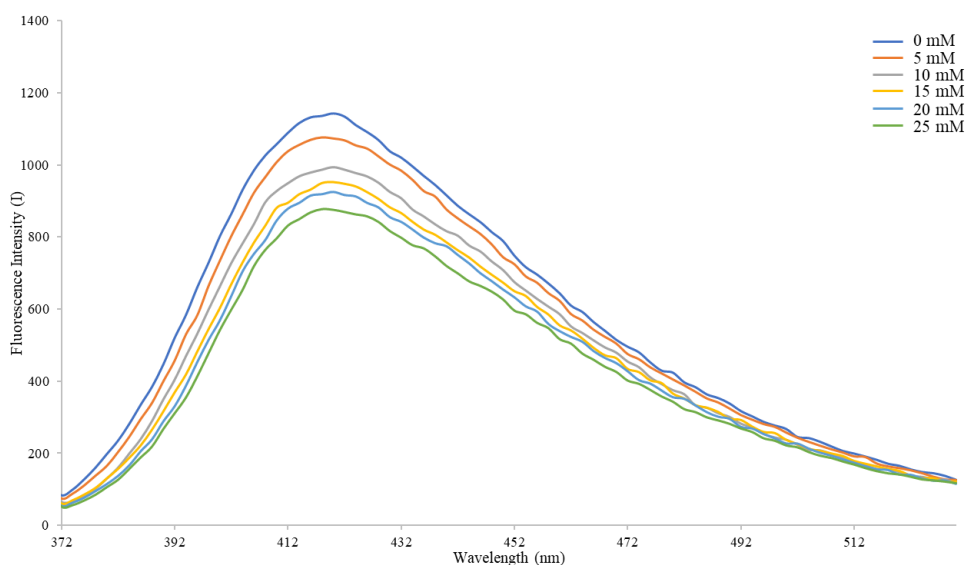

The fluorescence emission spectra of **59** with different concentration of MTBD excited at 360 nm

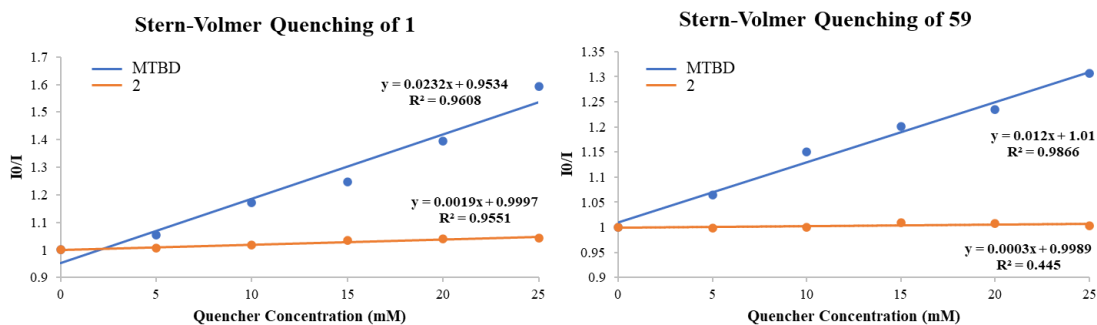

Stern-Volmer fluorescence quenching plot

All solutions were excited at 375 nm and the emission intensity at 418 nm was observed. DMSO was degassed with a stream of argon for 15 min. In a typical experiment, 2.0 mL of solution of lepidine (1.0 mM) in DMSO was added to the appropriate amount of MTBD in a screw-top 1.0 cm quartz cuvette and the emission spectra of the sample was collected. These results show that the fluorescence of lepidine could not be gradually quenched with the increase of the concentration of MTBD, which are consistent with our experimental observations that lepidine did not participate in the current alkylation reaction.

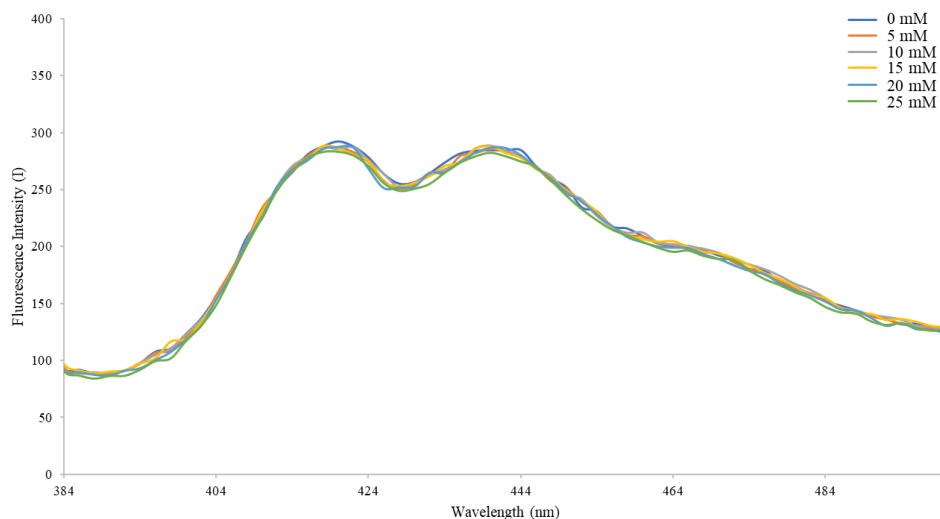

The fluorescence emission spectra of lepidine with different concentration of MTBD excited at 375 nm

All solutions were excited at 414 nm and the emission intensity at 478 nm was observed. DMSO was degassed with a stream of argon for 15 min. In a typical experiment, 2.0 mL of solution of **1** (1.0 mM) in DMSO was added to the appropriate amount of Et<sub>3</sub>N in a screw-top 1.0 cm quartz cuvette and the emission spectra of the sample was collected. These results show that the fluorescence of **1** could not be gradually quenched with the increase of the concentration of Et<sub>3</sub>N, which are consistent with our experimental observations that the alkylation reaction did not work in the presence of Et<sub>3</sub>N.

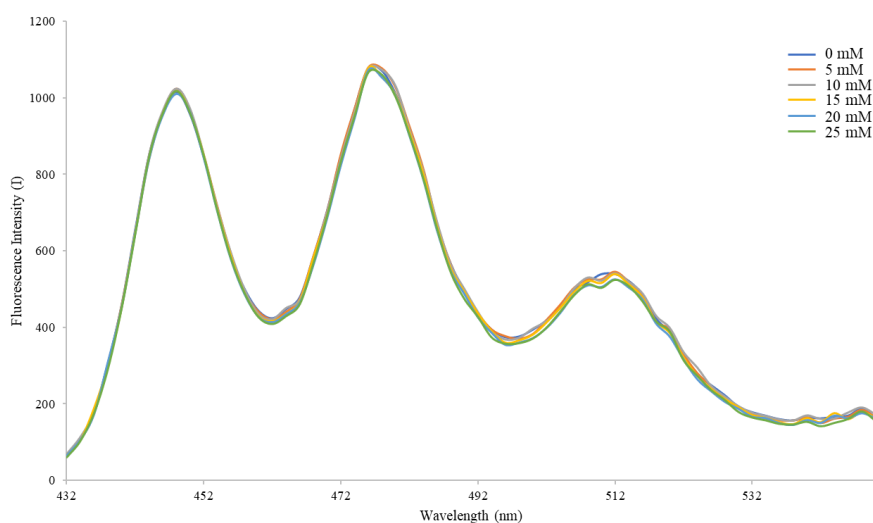

The fluorescence emission spectra of **1** with different concentration of Et<sub>3</sub>N excited at 414 nm

### 5) Conducting the reaction in the presence of $K_2S_2O_8$ in the dark:

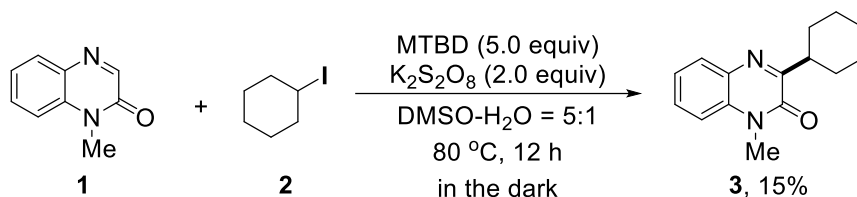

1-Methylquinoxalin-2(1*H*)-one (32.3 mg, 0.2 mmol, 1.0 equiv), iodocyclohexane (130  $\mu$ L, 1.0 mmol, 5.0 equiv), MTBD (144  $\mu$ L, 1.0 mmol, 5.0 equiv), and  $K_2S_2O_8$  (108.2 mg, 0.4 mmol, 2.0 equiv) were placed in a 10 mL Schlenk tube under  $N_2$ . Then DMSO (2.0 mL) and  $H_2O$  (0.4 mL) were added with a syringe. The reaction mixture was stirred in the dark at 80°C under  $N_2$  for 12 h. After completion of the reaction, the solvent was removed under reduced pressure, and the residue was purified by flash silica gel column chromatography (petroleum ether/EtOAc = 10/1) to afford the desired product **3** (7.3 mg, 15%).

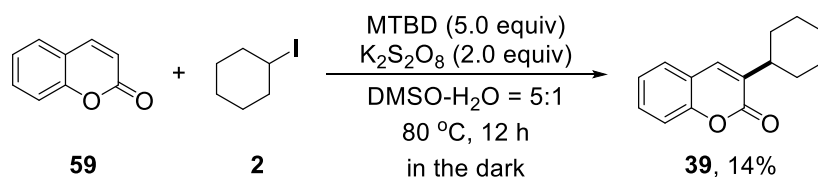

2*H*-Chromen-2-one (29.6 mg, 0.2 mmol, 1.0 equiv), iodocyclohexane (78  $\mu$ L, 0.6 mmol, 3.0 equiv), MTBD (58  $\mu$ L, 0.4 mmol, 2.0 equiv), and  $K_2S_2O_8$  (108.3 mg, 0.4 mmol, 2.0 equiv) were placed in a 10 mL Schlenk tube under  $N_2$ . Then DMSO (2.0 mL) and  $H_2O$  (0.4 mL) were added with a syringe. The reaction mixture was stirred in the dark at 80°C under  $N_2$  for 12 h. After completion of the reaction, the solvent was removed under reduced pressure, and the residue was purified by flash silica gel column chromatography (petroleum ether/EtOAc = 30/1) to afford the desired product **39** (6.4 mg, 14%).

### 6) Visible light on/off experiments:

1-Methylquinoxalin-2(1*H*)-one (32.3 mg, 0.2 mmol, 1.0 equiv), iodocyclohexane (130  $\mu$ L, 1.0 mmol, 5.0 equiv), and MTBD (144  $\mu$ L, 1.0 mmol, 5.0 equiv) were placed in a dry 10 mL Schlenk tube under a nitrogen atmosphere. Then anhydrous DMSO (2.0 mL) was added with a syringe. The reaction mixture was stirred and irradiated by using 6 W blue LEDs at room temperature. The process of photocatalytic reaction with and without light was monitored by  $^1H$  NMR using dibromomethane as internal

standard. The results suggest that the formation of **3** requires continuous visible light irradiation.

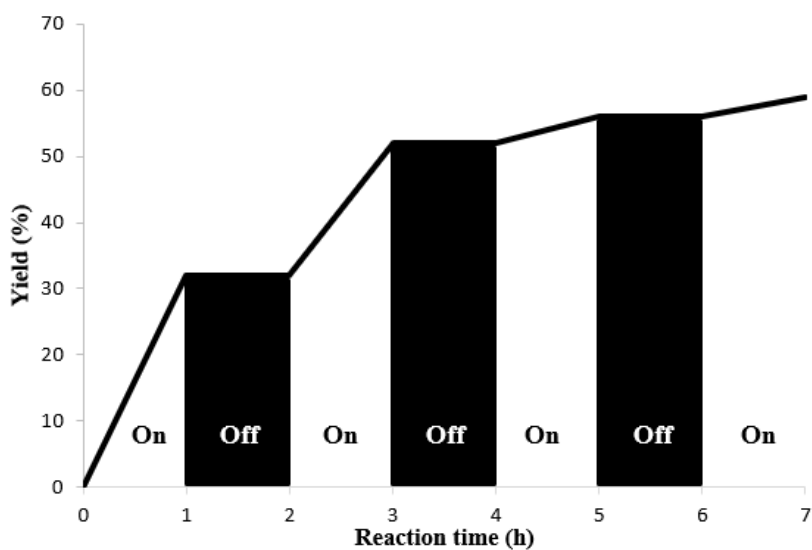

### 7) The emission spectra for the light source:

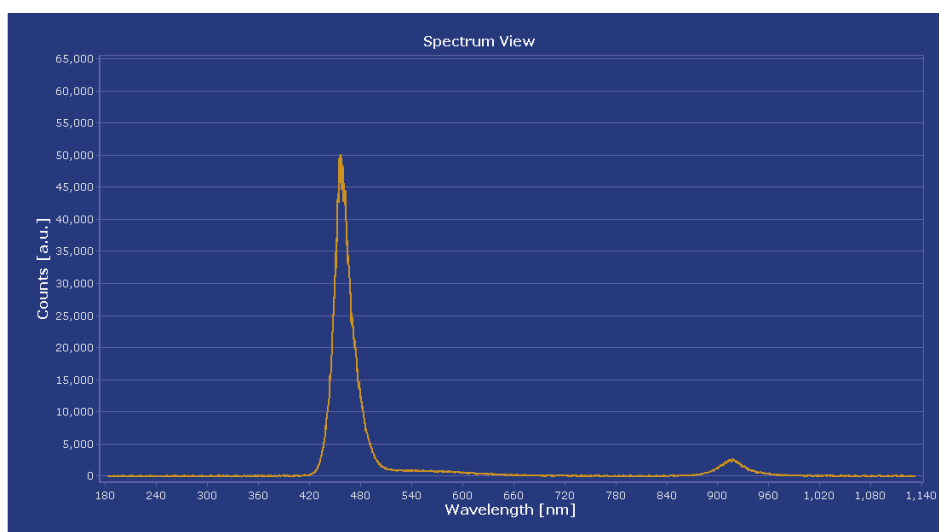

The emission spectra for 6 W blue LEDs

### 8) Determination of quantum yield:

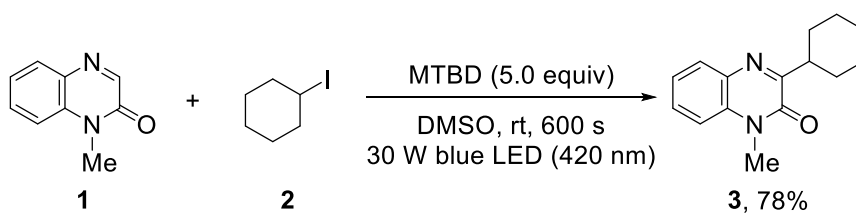

1-Methylquinoxalin-2(1*H*)-one (32.6 mg, 0.2 mmol, 1.0 equiv), iodocyclohexane (130  $\mu\text{L}$ , 1.0 mmol, 5.0 equiv), and MTBD (144  $\mu\text{L}$ , 1.0 mmol, 5.0 equiv) were placed in a quartz cuvette (10 mm path length). Anhydrous DMSO (2.0 mL) was added with a syringe. Then the solution was degassed with a stream of nitrogen for 10 min. The reaction mixture was stirred and irradiated by using a 30 W blue LED ( $\lambda = 420 \text{ nm}$ , PLS-LED100B) at room temperature for 600 s. After completion of the reaction, the solution was measured the unit area photon flux (photosynthetic active radiation meter, Apogee MQ-200). The yield of product **3** formed was determined by  $^1\text{H}$  NMR spectroscopic analysis using dibromomethane as an internal standard. The quantum yield is calculated using the following equation:

$$\Phi = \frac{\text{mol of product formed}}{\text{flux} \cdot S \cdot t}$$

Where  $\Phi$  is quantum yield,  $S$  ( $\text{m}^2$ ) is the irradiation area and  $t$  (s) is the reaction time.

Experiment: 1-methylquinoxalin-2(1*H*)-one **1** (32.6 mg), iodocyclohexane (130  $\mu\text{L}$ ), and MTBD (144  $\mu\text{L}$ ) after 600s, the unite area photon flux was  $604 \mu\text{mol} \cdot \text{s}^{-1} \cdot \text{m}^{-2}$  (average of three experiments), the irradiation area was  $3.0 \times 10^{-4} \text{m}^2$ , and the yield of product **3** was 78%.

Sample quantum yield calculation:

$$\Phi = \frac{0.156 \times 10^3}{604 \times 3.0 \times 10^{-4} \times 600} = 1.43$$

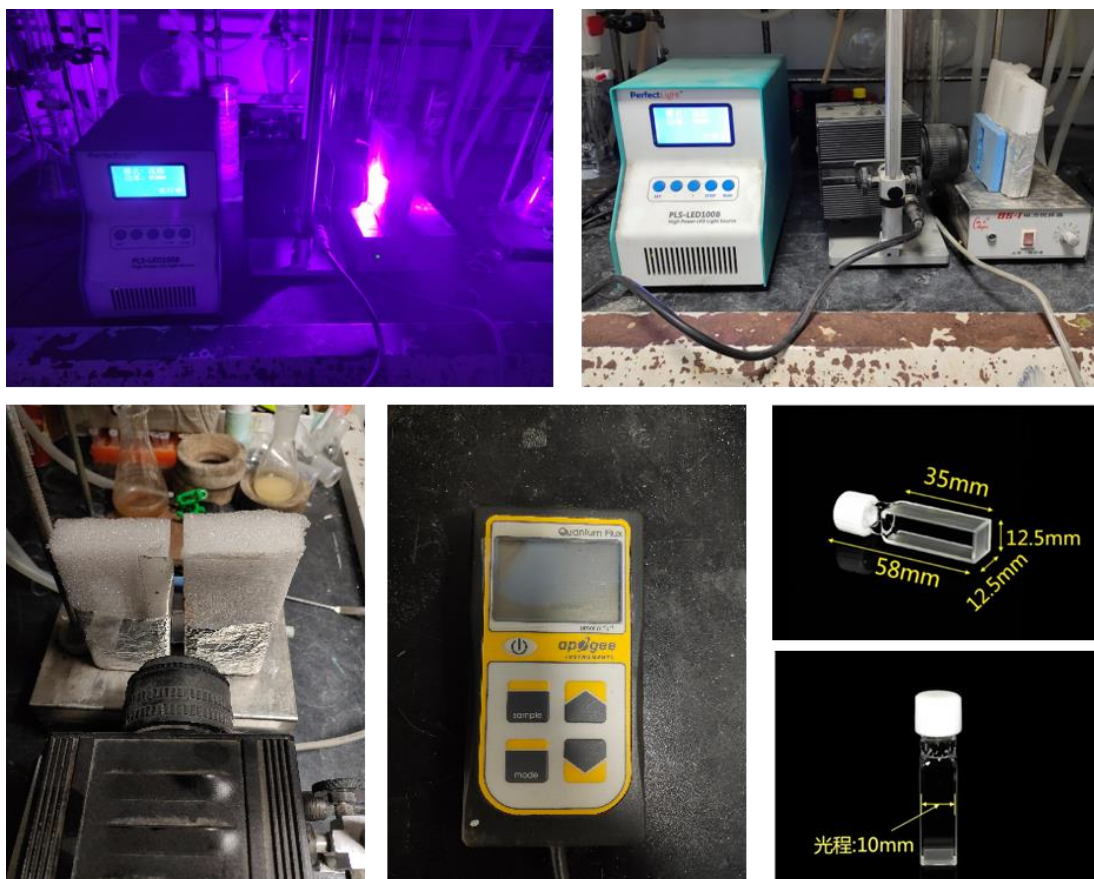

Experimental setup for determining quantum yield



## References:

- [1] a) C. W. Cheung, F. E. Zhurkin, X. Hu, *J. Am. Chem. Soc.* **2015**, *137*, 4932; b) M. Murai, C. Mizuta, R. Taniguchi, K. Takai, *Org. Lett.* **2017**, *19*, 6104.
- [2] J. Wang, B. Sun, L. Zhang, T. Xu, Y. Xie, C. Jin, *Asian Journal of Organic Chemistry* **2019**, *8*, 1942.
- [3] C. Jin, Z. Yan, B. Sun, J. Yang, *Org. Lett.* **2019**, *21*, 2064.
- [4] C. Huang, J. Li, C. Li, *Nat. Commun.* **2021**, *12*, 4010.
- [5] M. Tian, Y. Wang, X. Bu, Y. Wang, X. Yang, *Catal. Sci. Technol.* **2021**, *11*, 4272.
- [6] K. Niu, L. Song, Y. Hao, Y. Liu, Q. Wang, *Chem. Commun.* **2020**, *56*, 11673.
- [7] Z. Yan, B. Sun, X. Zhang, X. Zhuang, J. Yang, W. Su, C. Jin, *Chem. Asian J.* **2019**, *14*, 3344.
- [8] K. Niu, Y. Hao, L. Song, Y. Liu, Q. Wang, *Green Chem.* **2021**, *23*, 302.
- [9] B. Wang, H. Yao, X. Zhong, Z. Yan, S. Lin, *Tetrahedron Lett.* **2021**, *64*, 152720.
- [10] L. Xie, L. Jiang, J. Tan, Y. Wang, X. Xu, B. Zhang, Z. Cao, W. He. *ACS Sustainable Chem. Eng.* **2019**, *7*, 14153.
- [11] W. Zhang, Y. Pan, C. Yang, L. Chen, X. Li, J. Cheng, *J. Org. Chem.* **2019**, *84*, 7786.
- [12] S. Singh, N. Dagar, S. R. Roy, *Org. Biomol. Chem.* **2021**, *19*, 5383.
- [13] L. Liu, N. Pang, W. Sheng, L. Su, L. Liu, J. Dong, Y. Zhou, S. Yin, *Adv. Synth. Catal.* **2019**, *361*, 4126.
- [14] D. Villemin, D. Goussu, *Heterocycles* **1989**, *29*, 1255.
- [15] D. D. P. Kranz, A. G. Griesbeck, R. Alle, R. Perez-Ruiz, J. M. Neudörfl, K. Meerholz, H. Schmalz, *Angew. Chem. Int. Ed.* **2012**, *51*, 6000.
- [16] A. Ling, L. Zhang, R. X. Tan, Z. Liu, *J. Org. Chem.* **2018**, *83*, 14489.
- [17] Y. Wu, X. Chu, D. Yang, C. Ma, *SynOpen* **2021**, *5*, 114.
- [18] V. N. Shinde, K. Rangan, D. Kumar, A. Kumar, *J. Org. Chem.* **2021**, *86*, 9755.

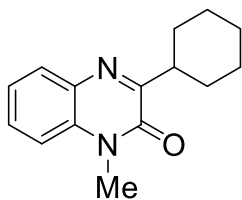

**3**

**<sup>1</sup>H NMR (400 MHz, CDCl<sub>3</sub>)**

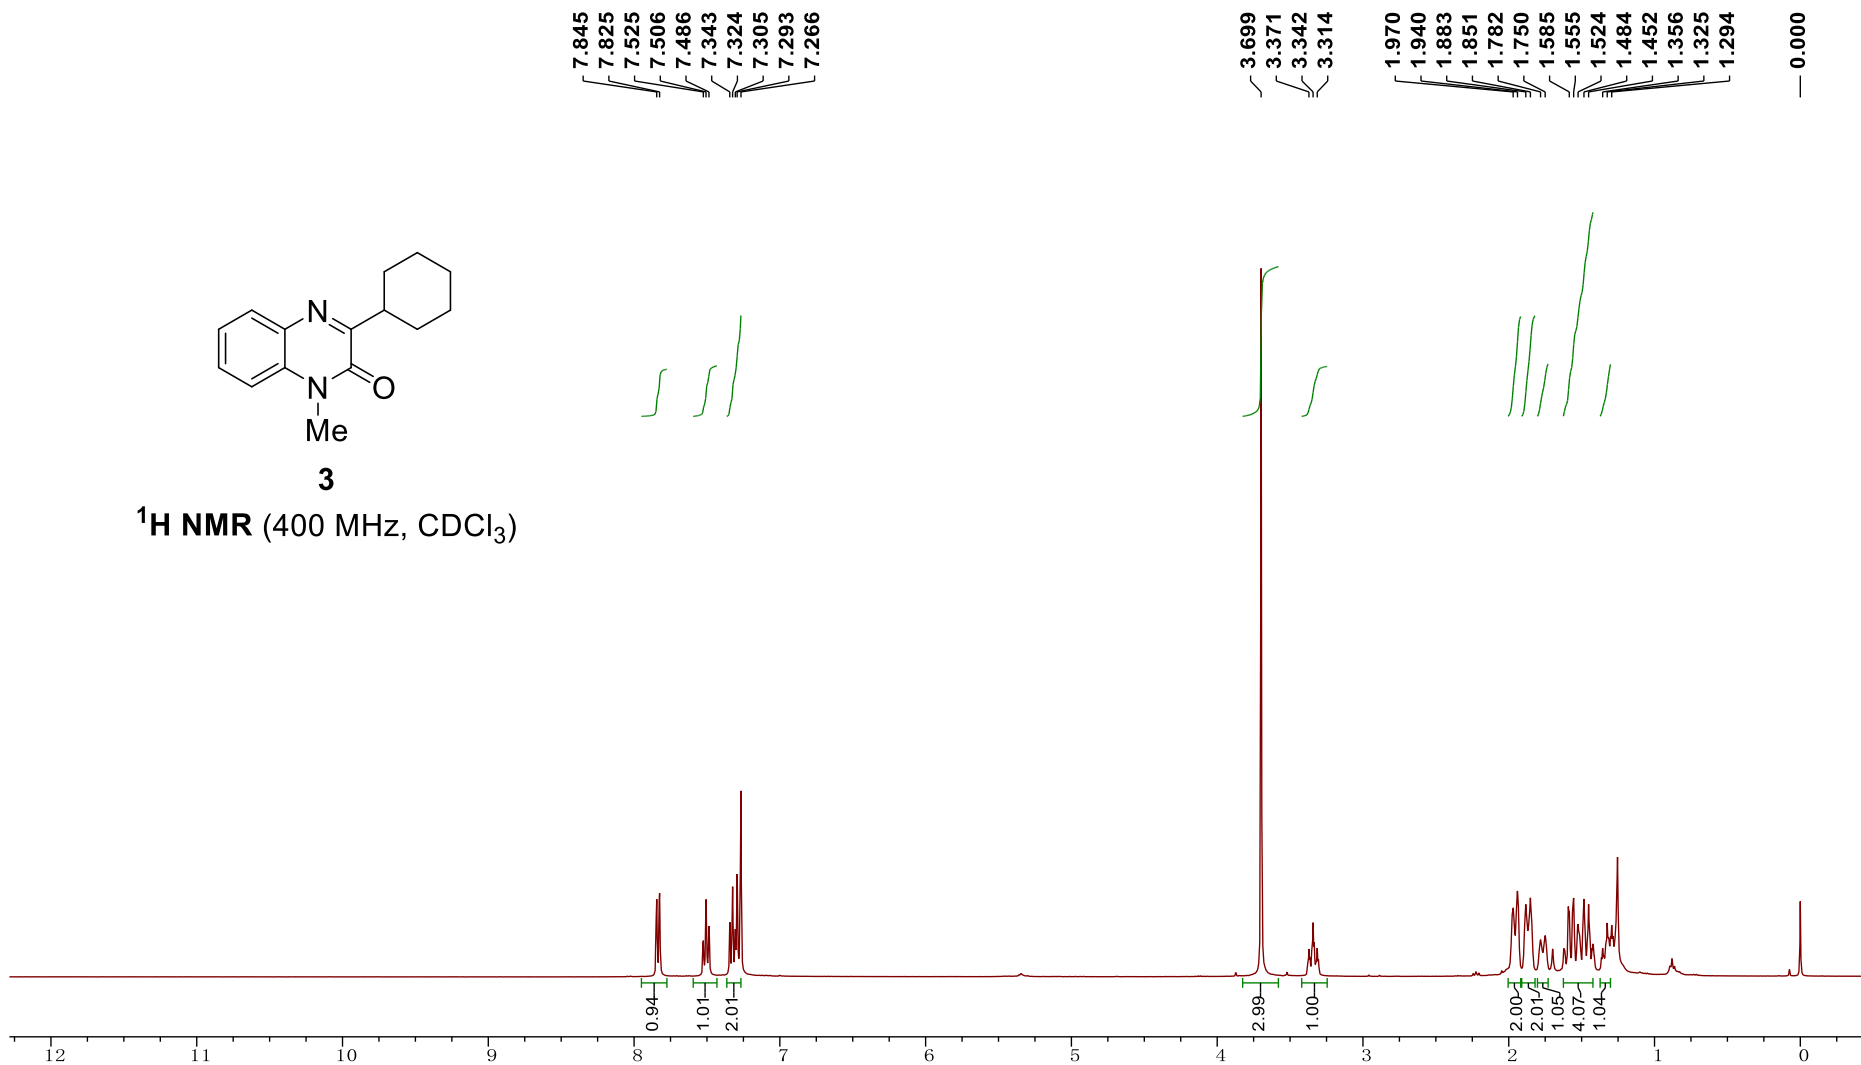

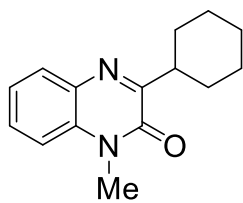

**3**

<sup>13</sup>C NMR (101 MHz, CDCl<sub>3</sub>)

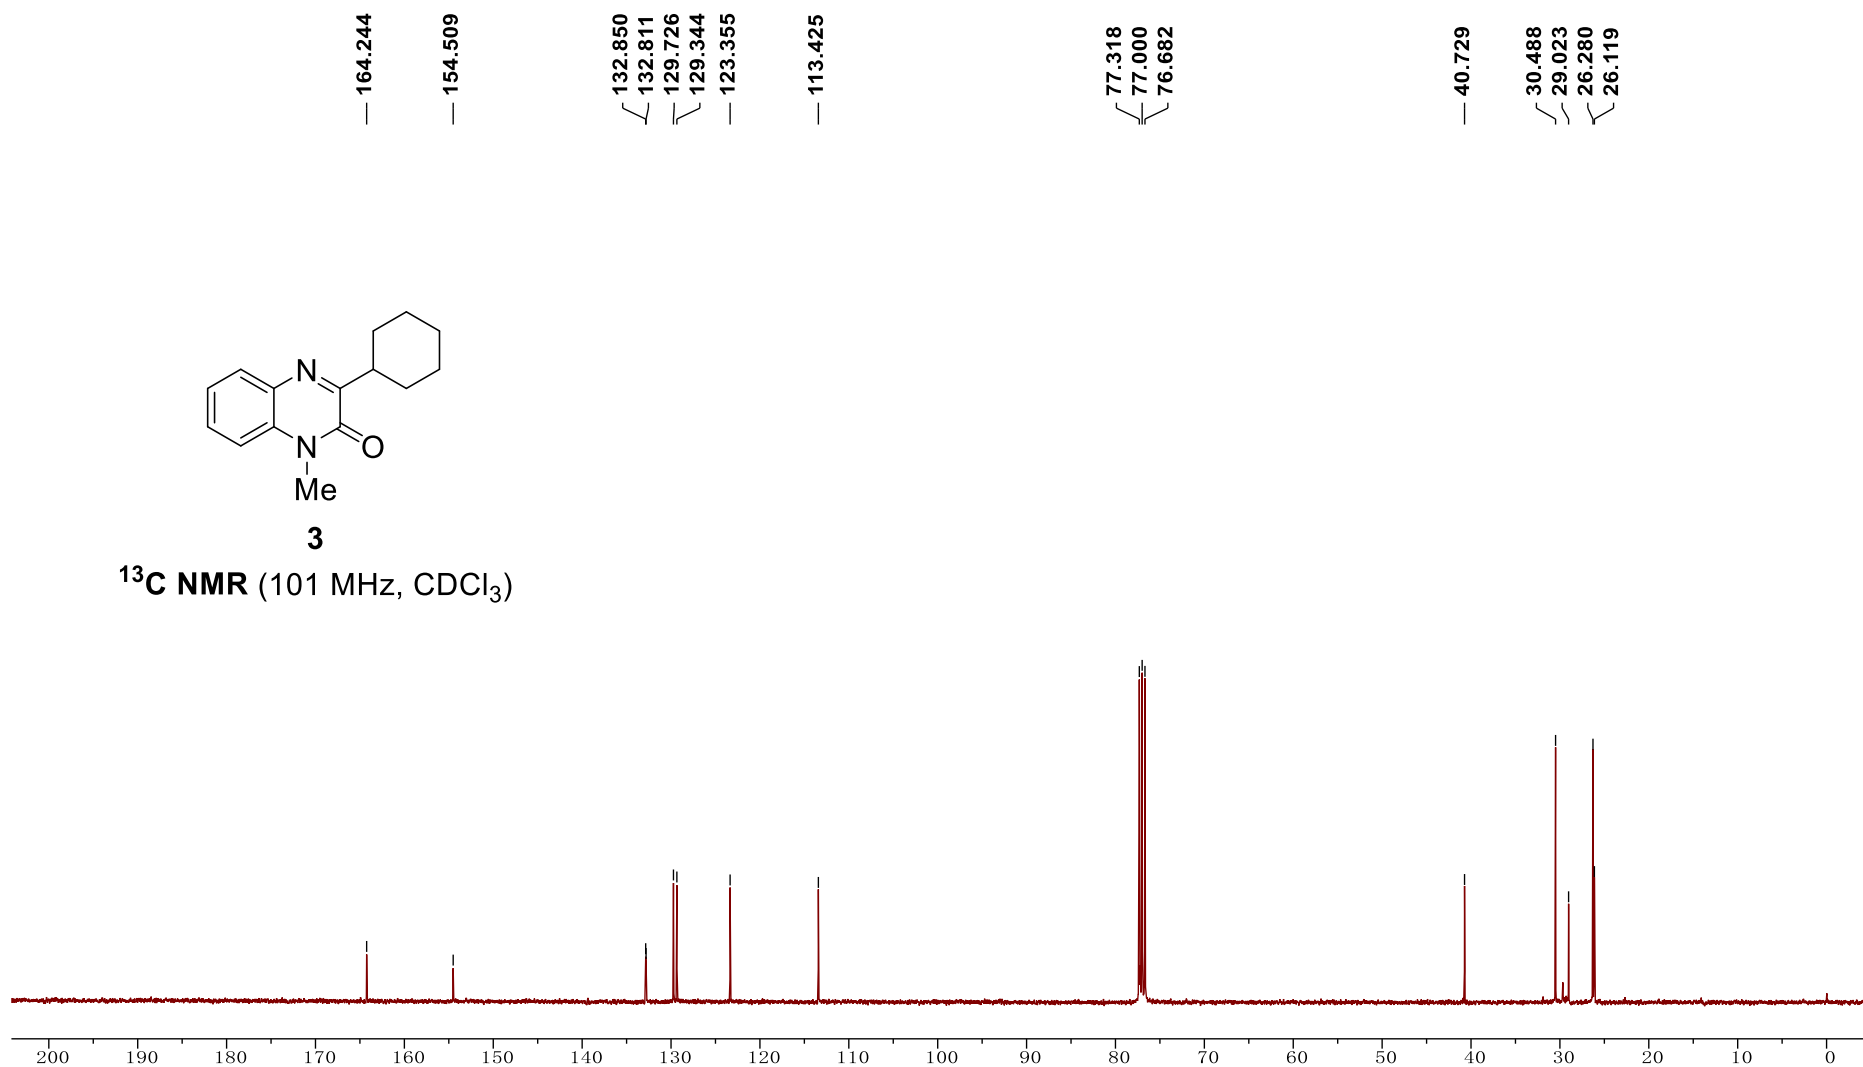

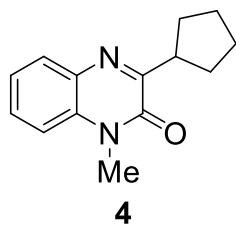

<sup>1</sup>H NMR (400 MHz, CDCl<sub>3</sub>)

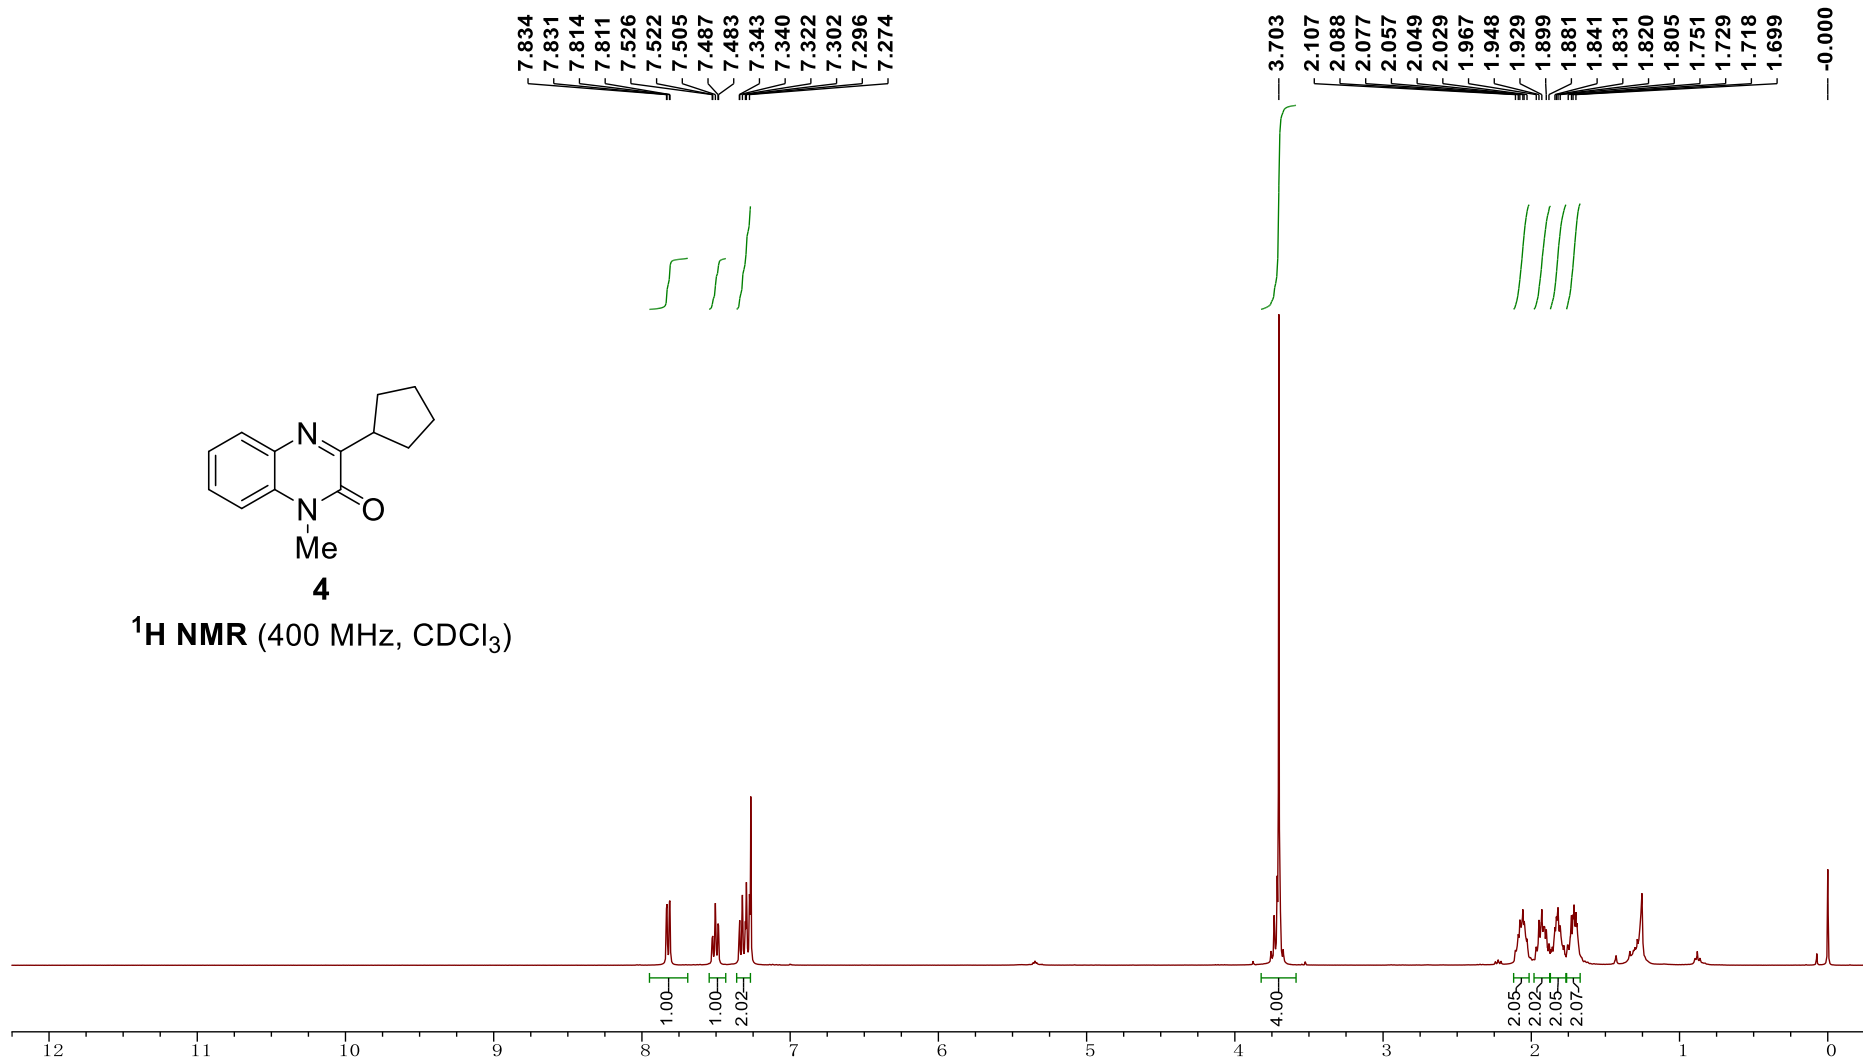

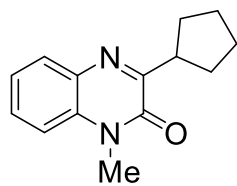

**4**

**<sup>13</sup>C NMR (75 MHz, CDCl<sub>3</sub>)**

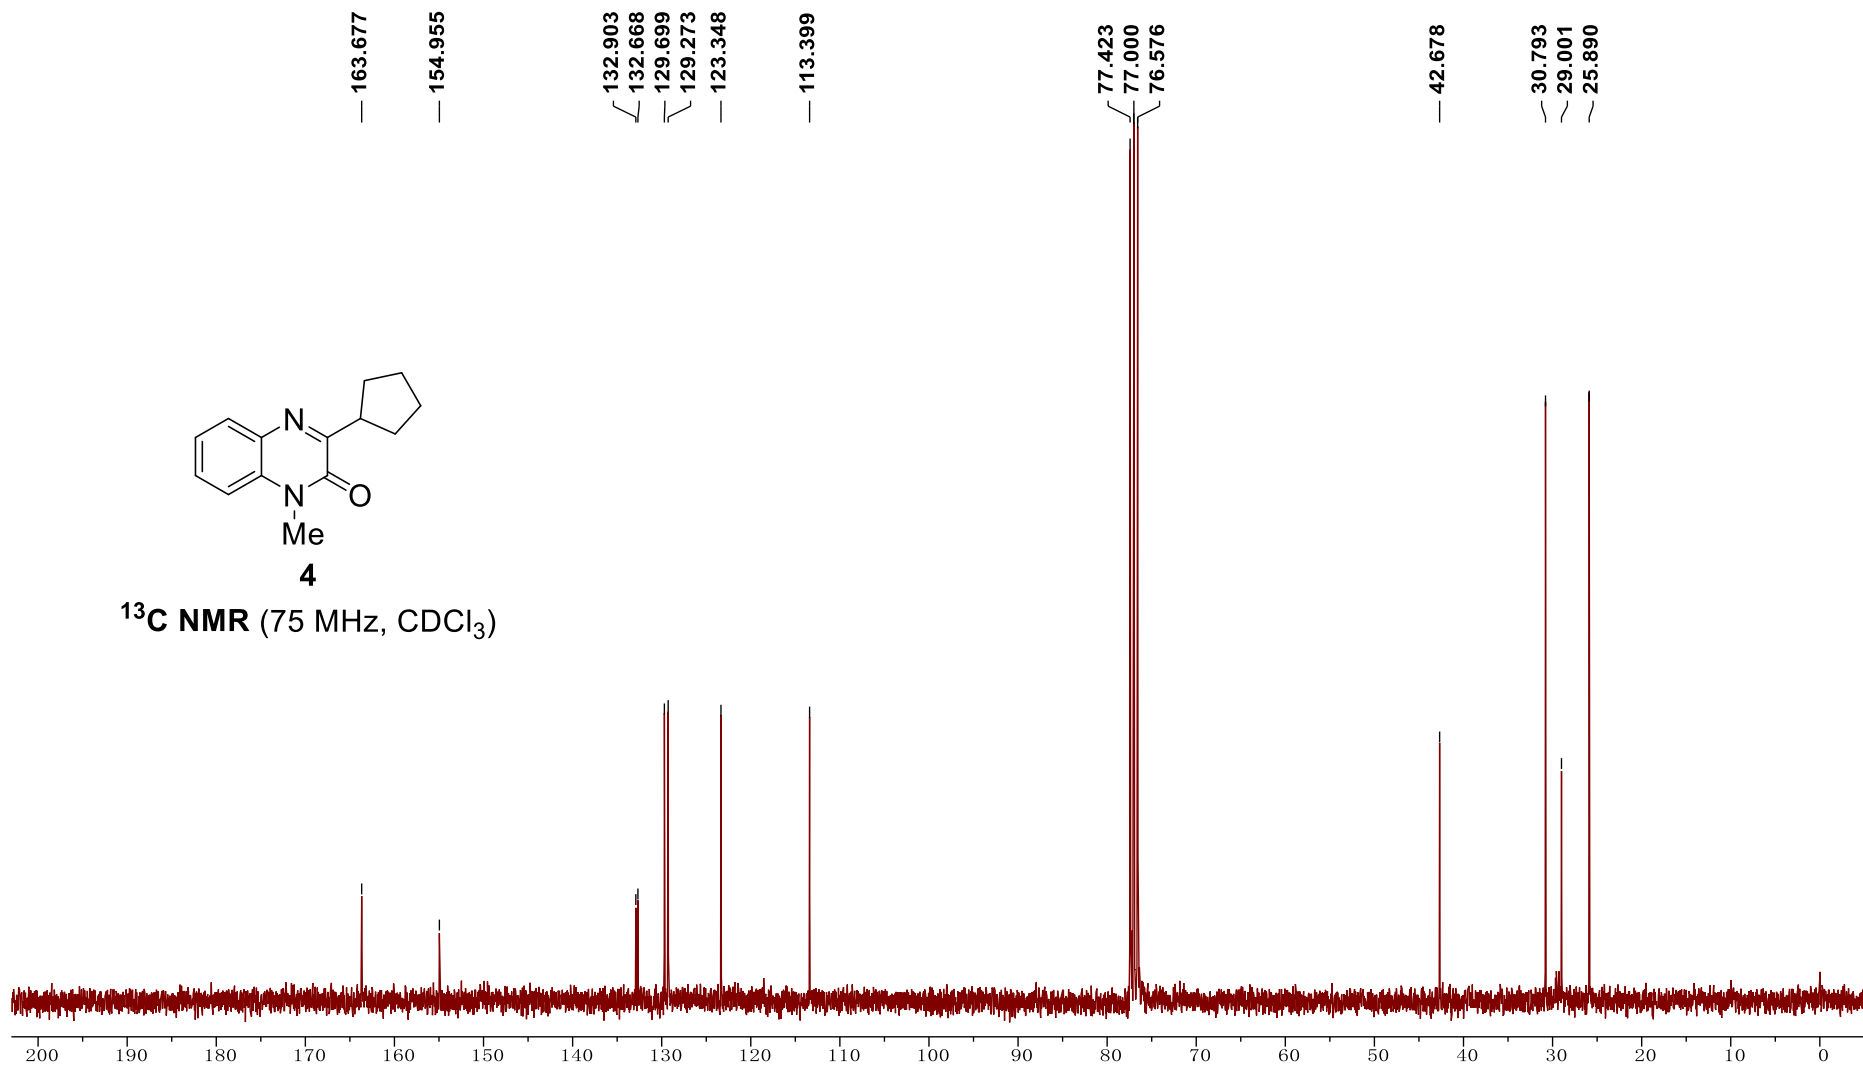

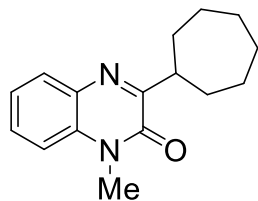

**5**

**<sup>1</sup>H NMR (400 MHz, CDCl<sub>3</sub>)**

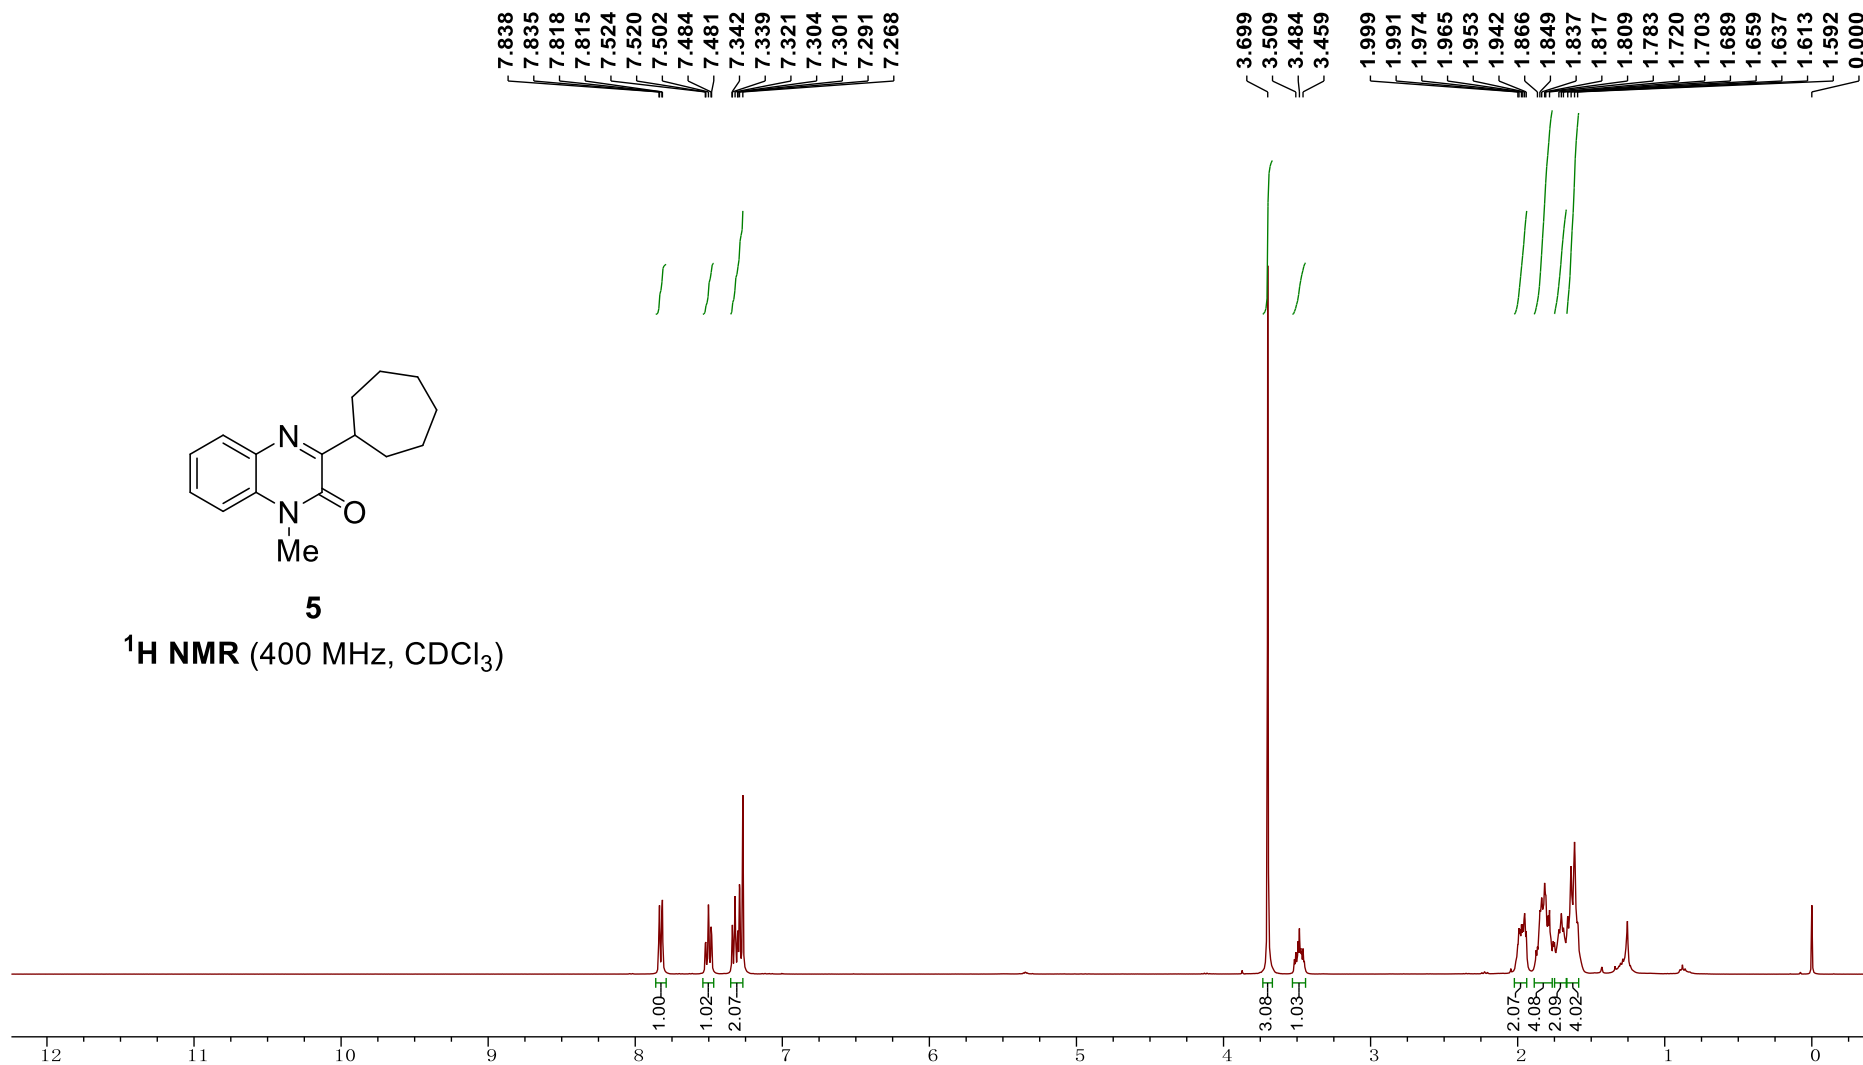

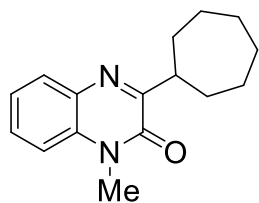

**5**

**<sup>13</sup>C NMR (75 MHz, CDCl<sub>3</sub>)**

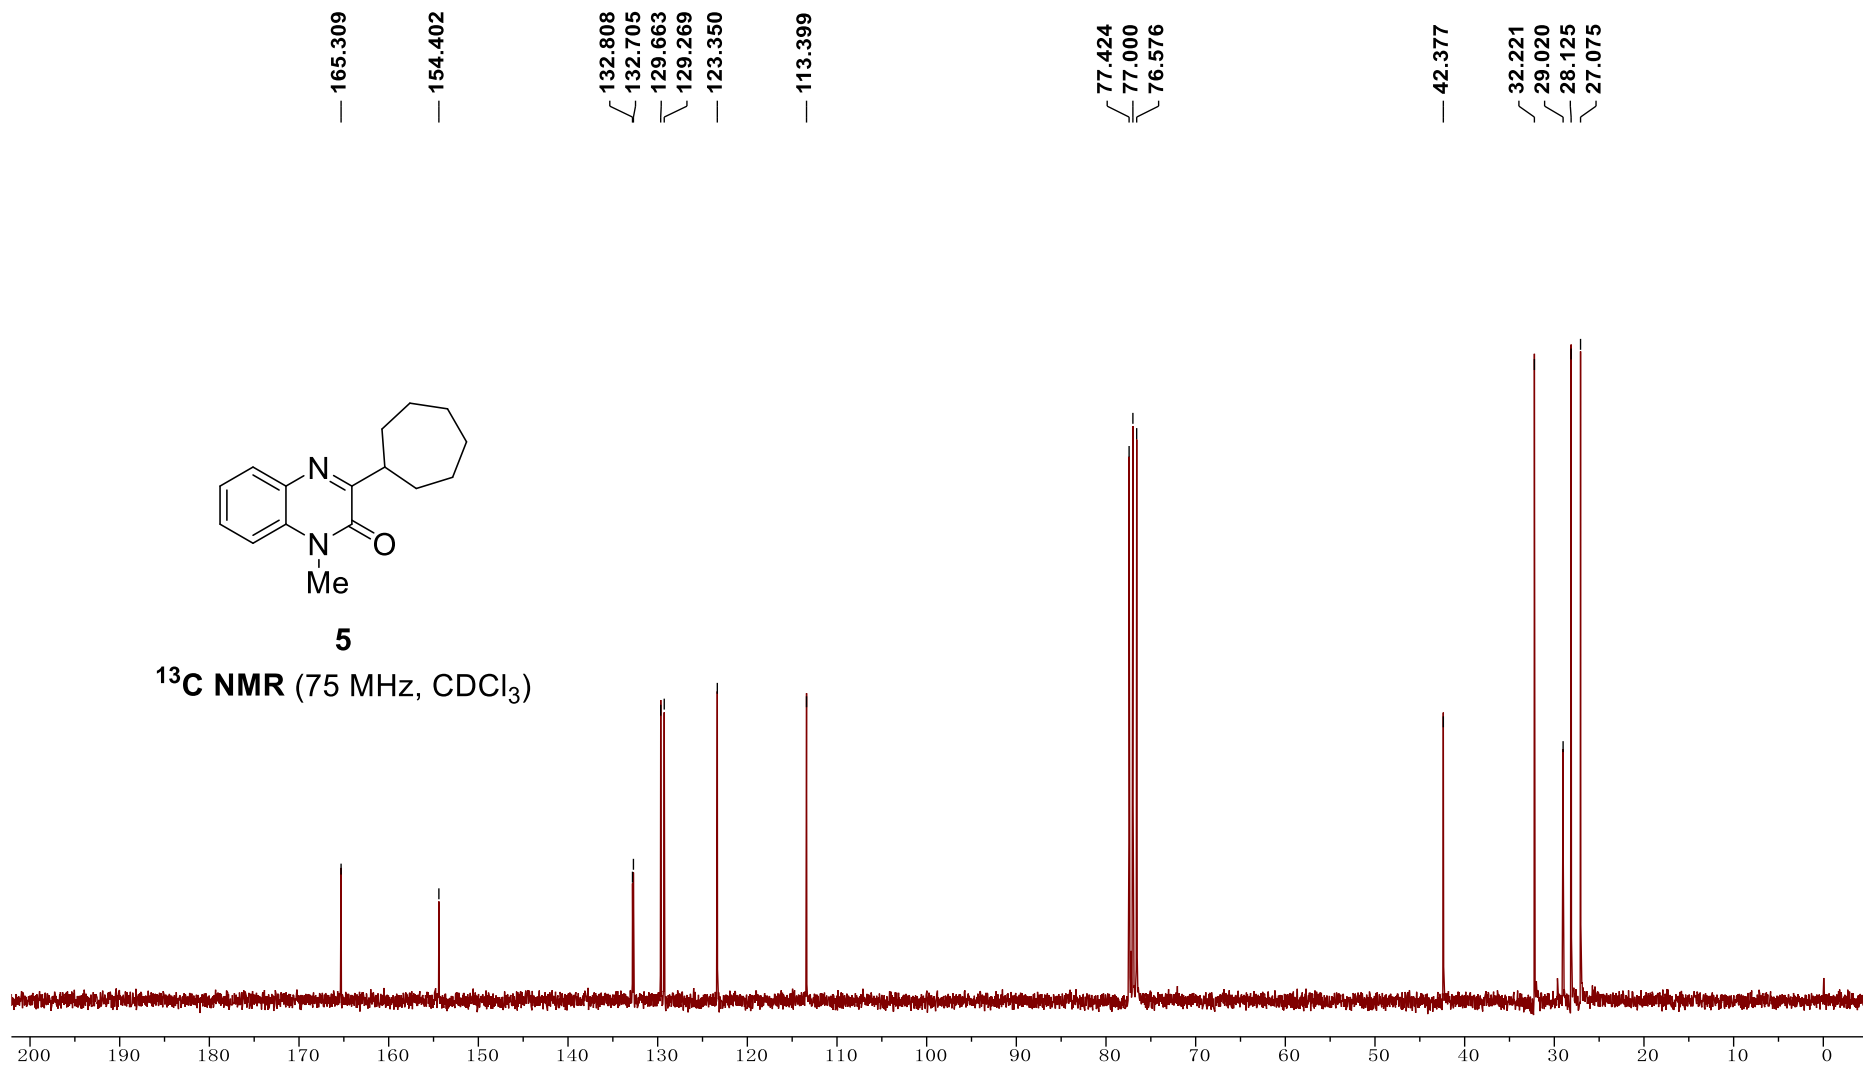

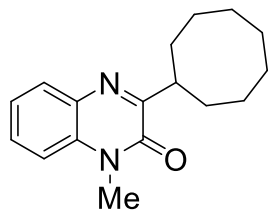

**6**

**<sup>1</sup>H NMR (400 MHz, CDCl<sub>3</sub>)**

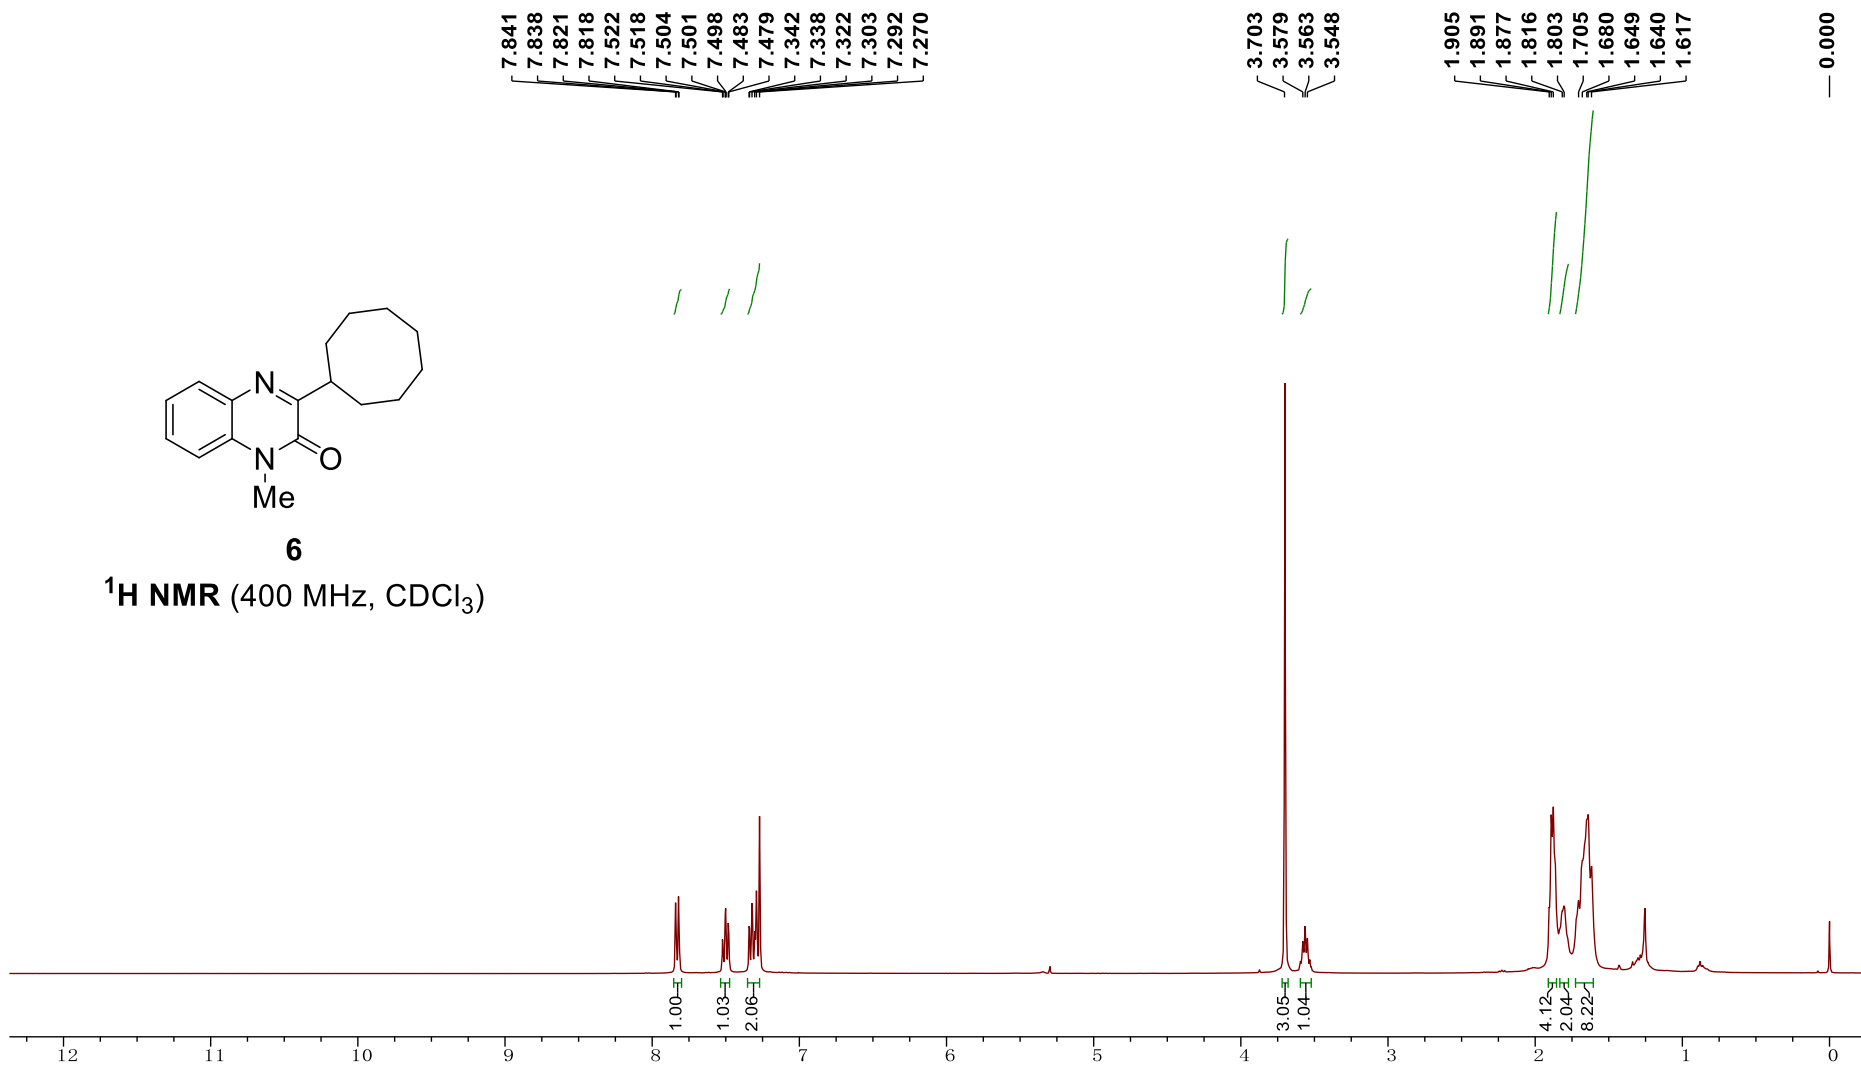



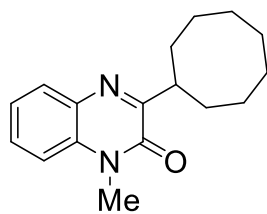

**6**

**<sup>13</sup>C NMR (101 MHz, CDCl<sub>3</sub>)**

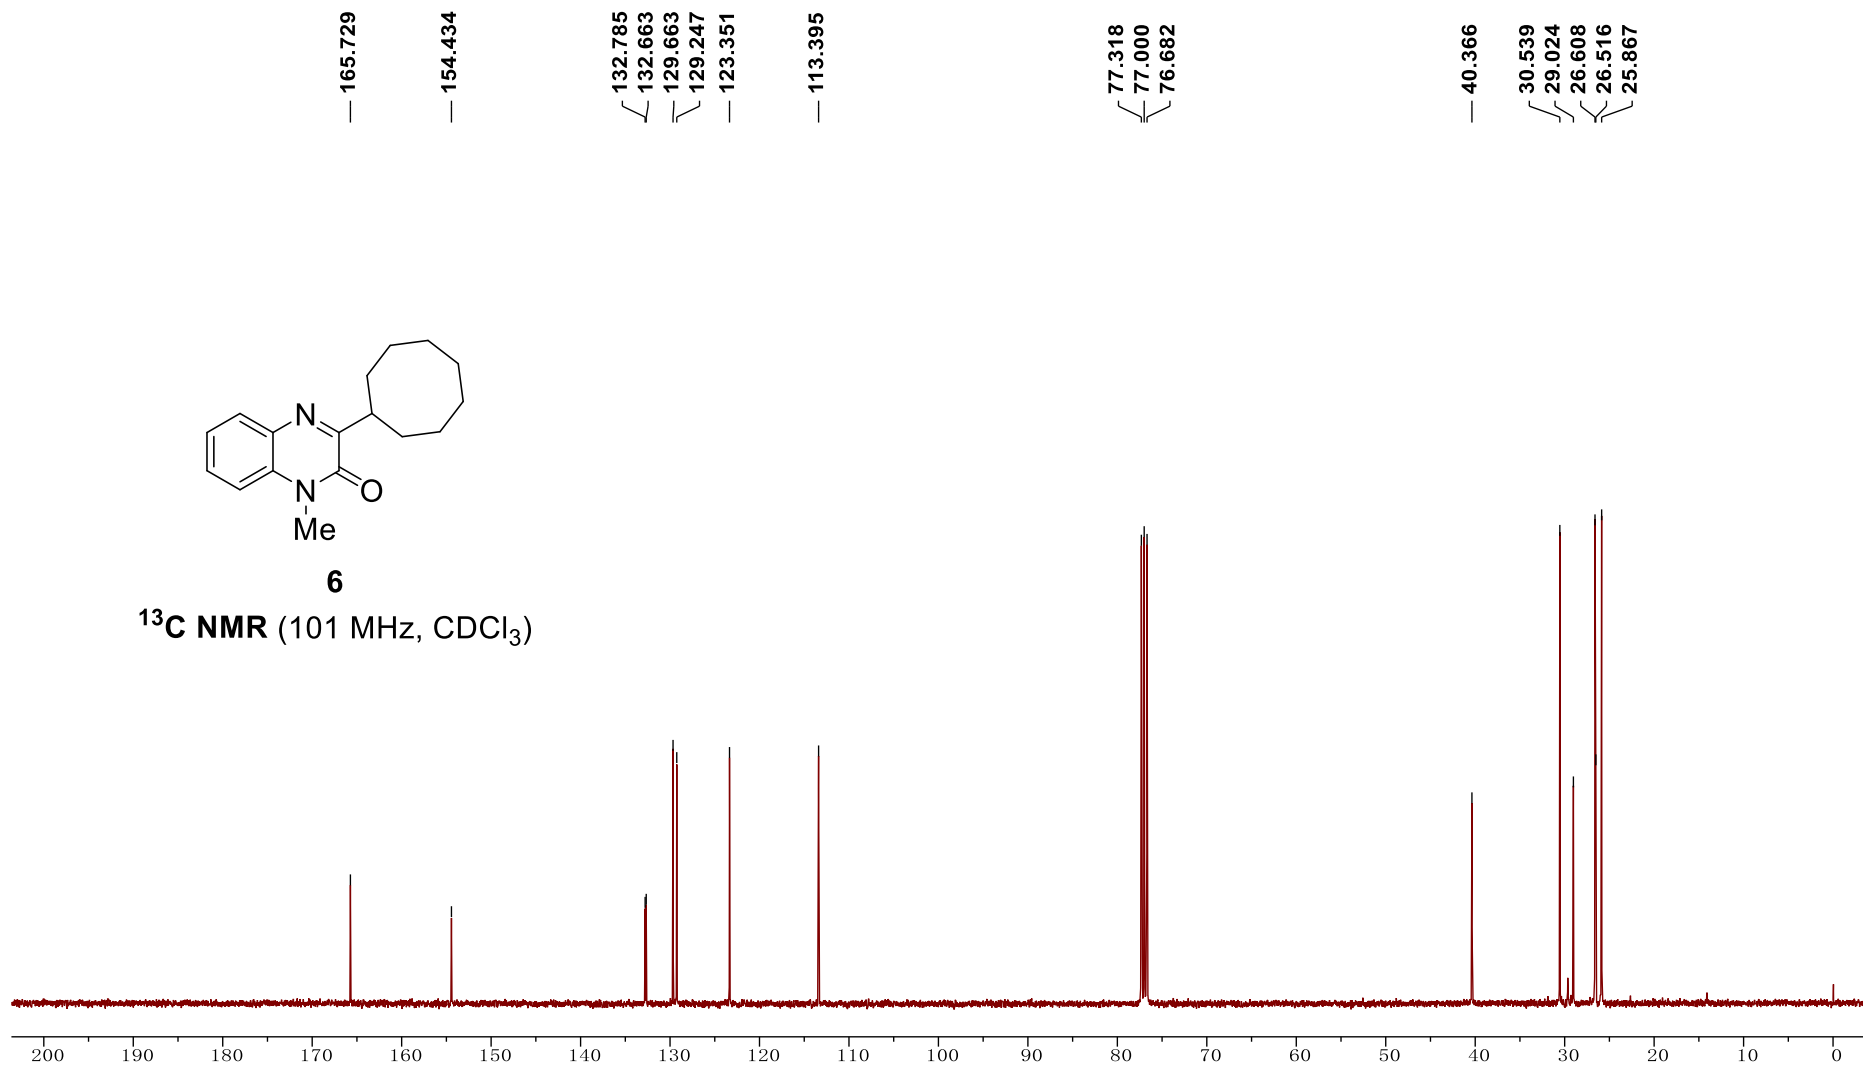

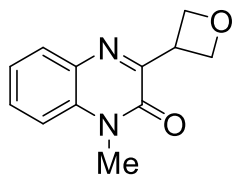

7

$^1\text{H NMR}$  (400 MHz,  $\text{CDCl}_3$ )

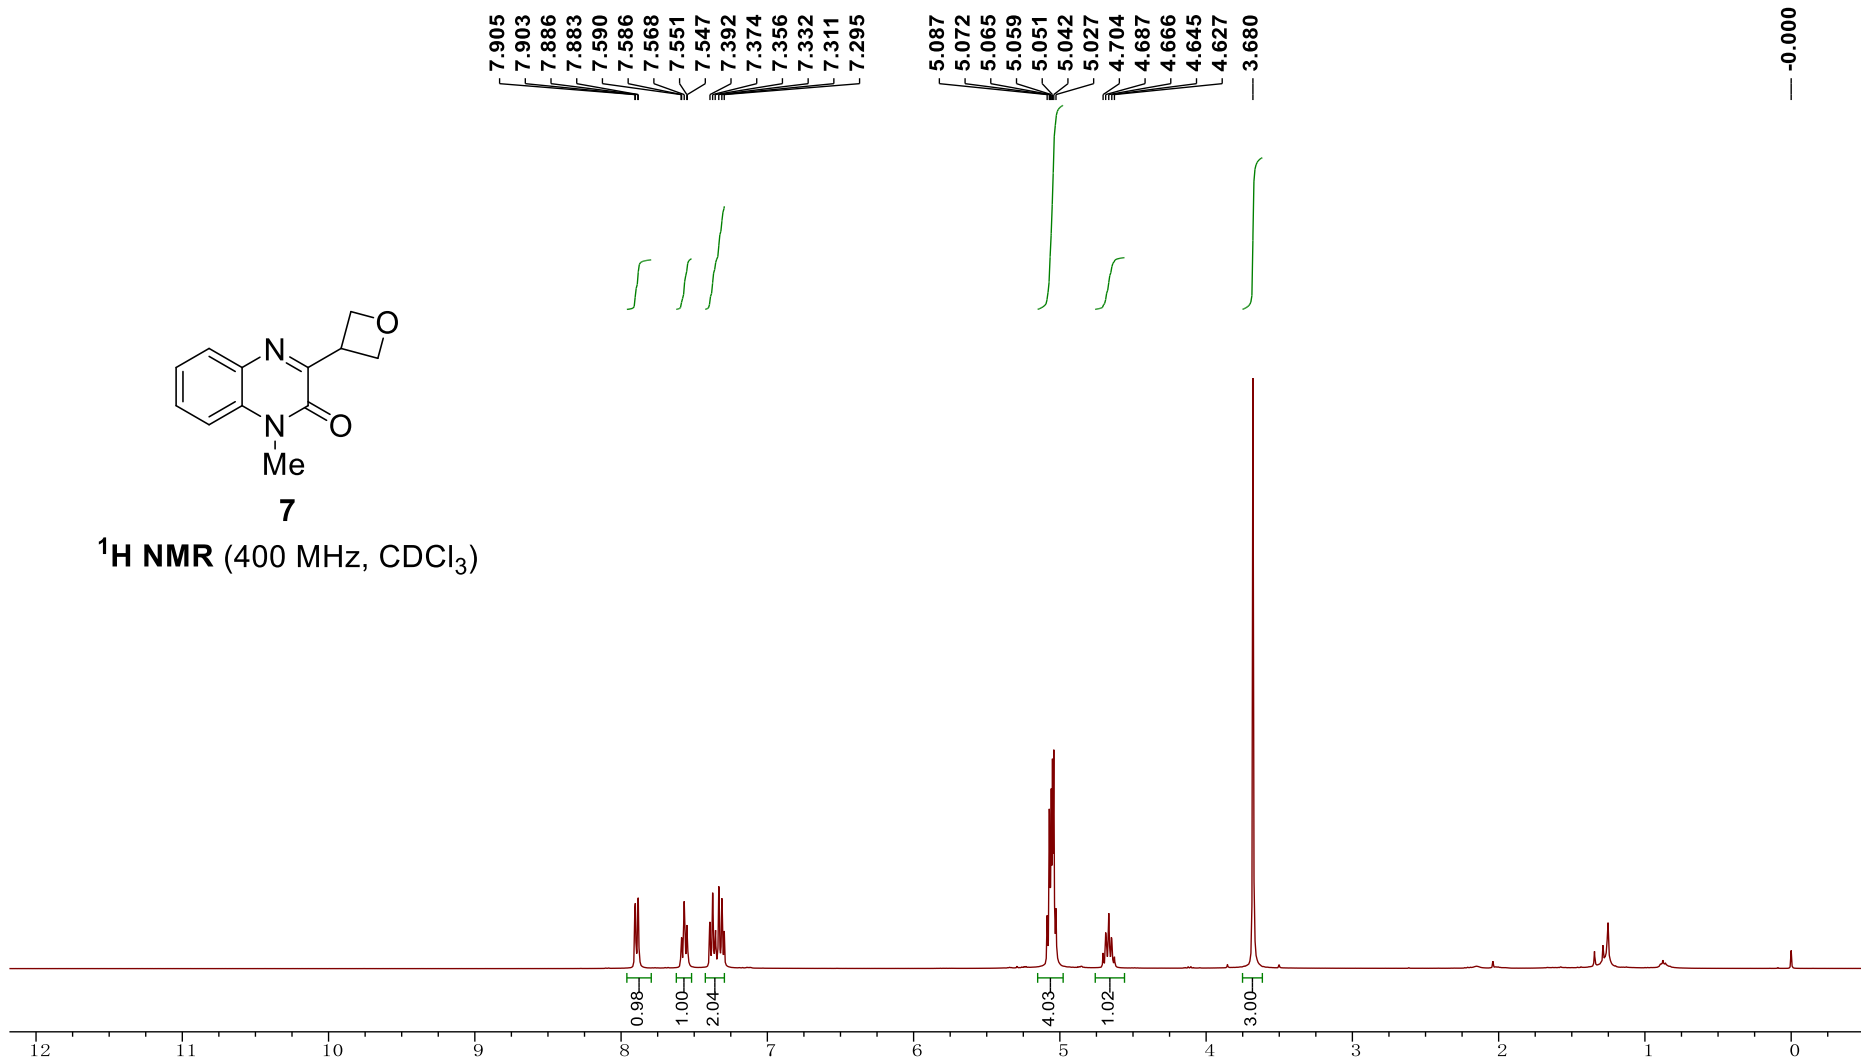

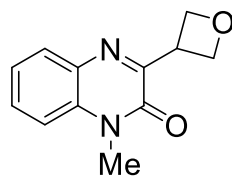

7

$^{13}\text{C}$  NMR (75 MHz,  $\text{CDCl}_3$ )

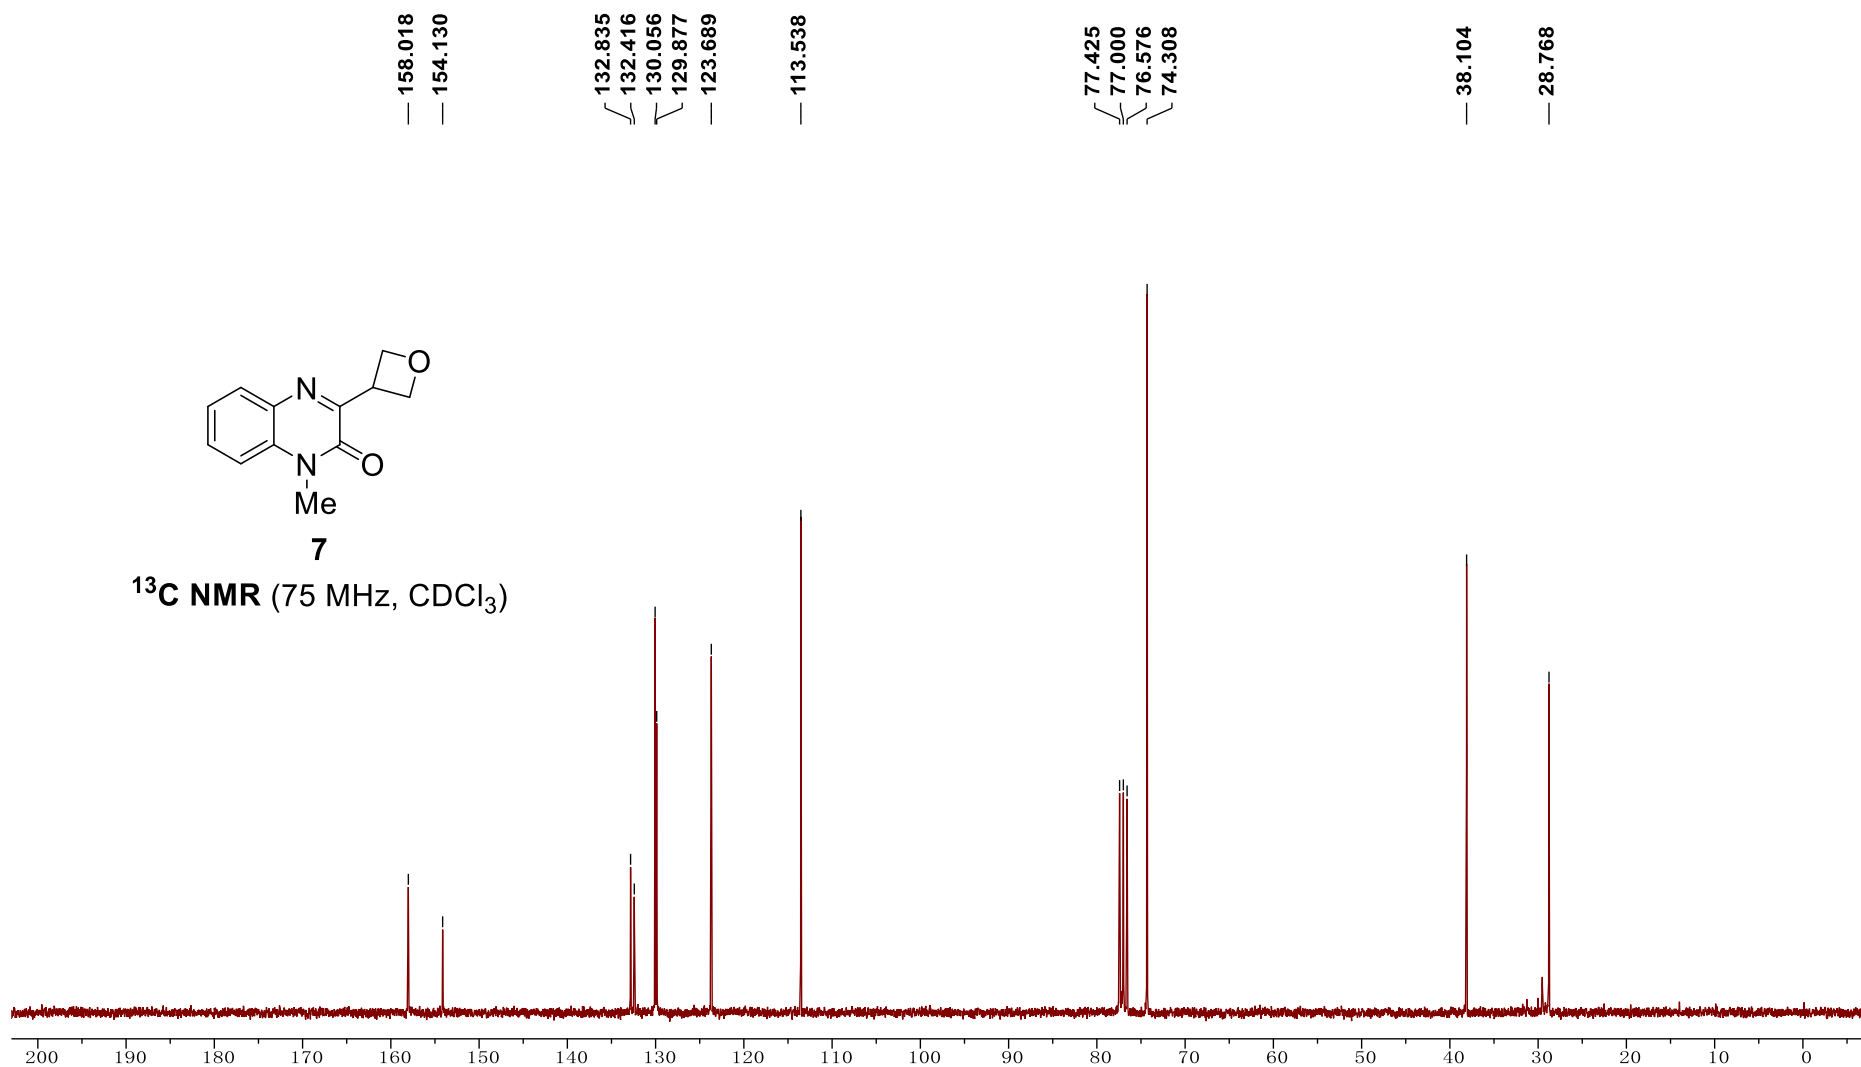

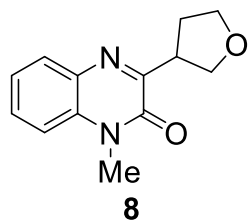

<sup>1</sup>H NMR (300 MHz, CDCl<sub>3</sub>)

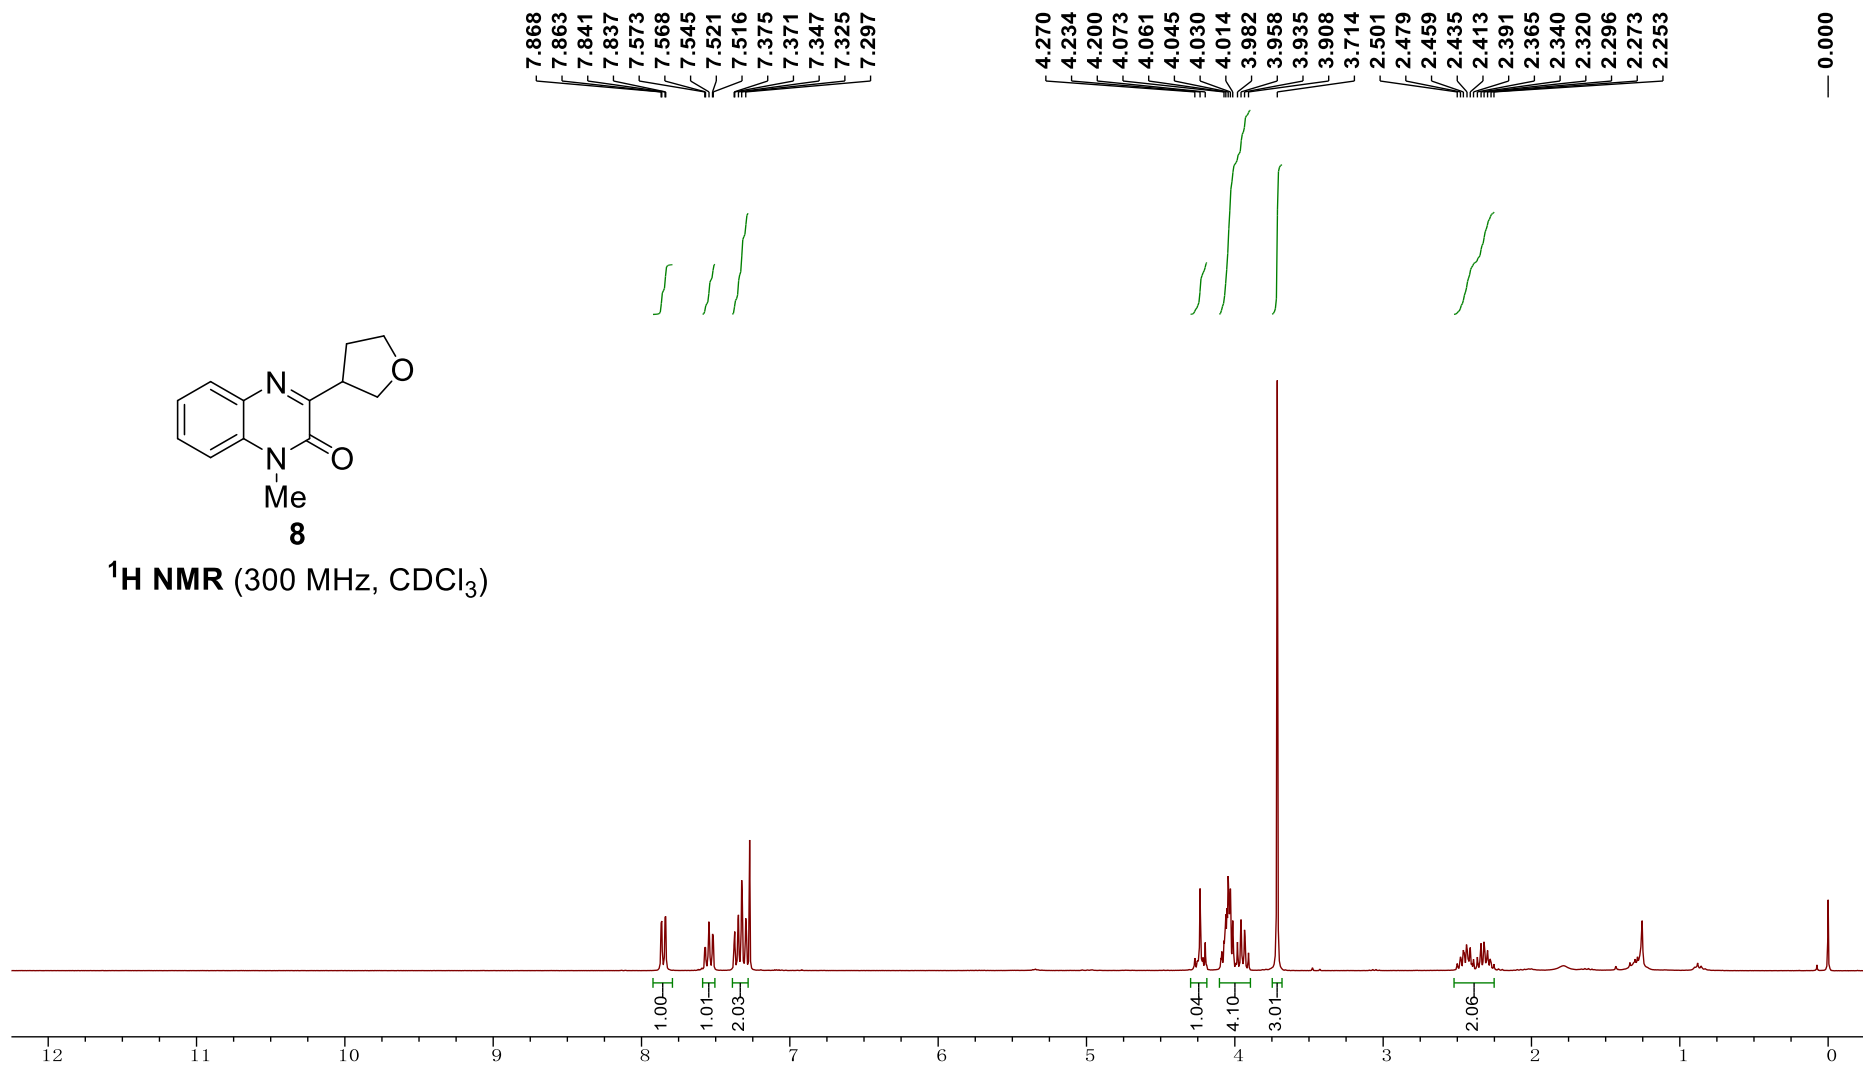

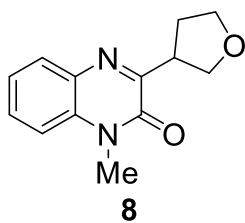

**<sup>13</sup>C NMR (101 MHz, CDCl<sub>3</sub>)**

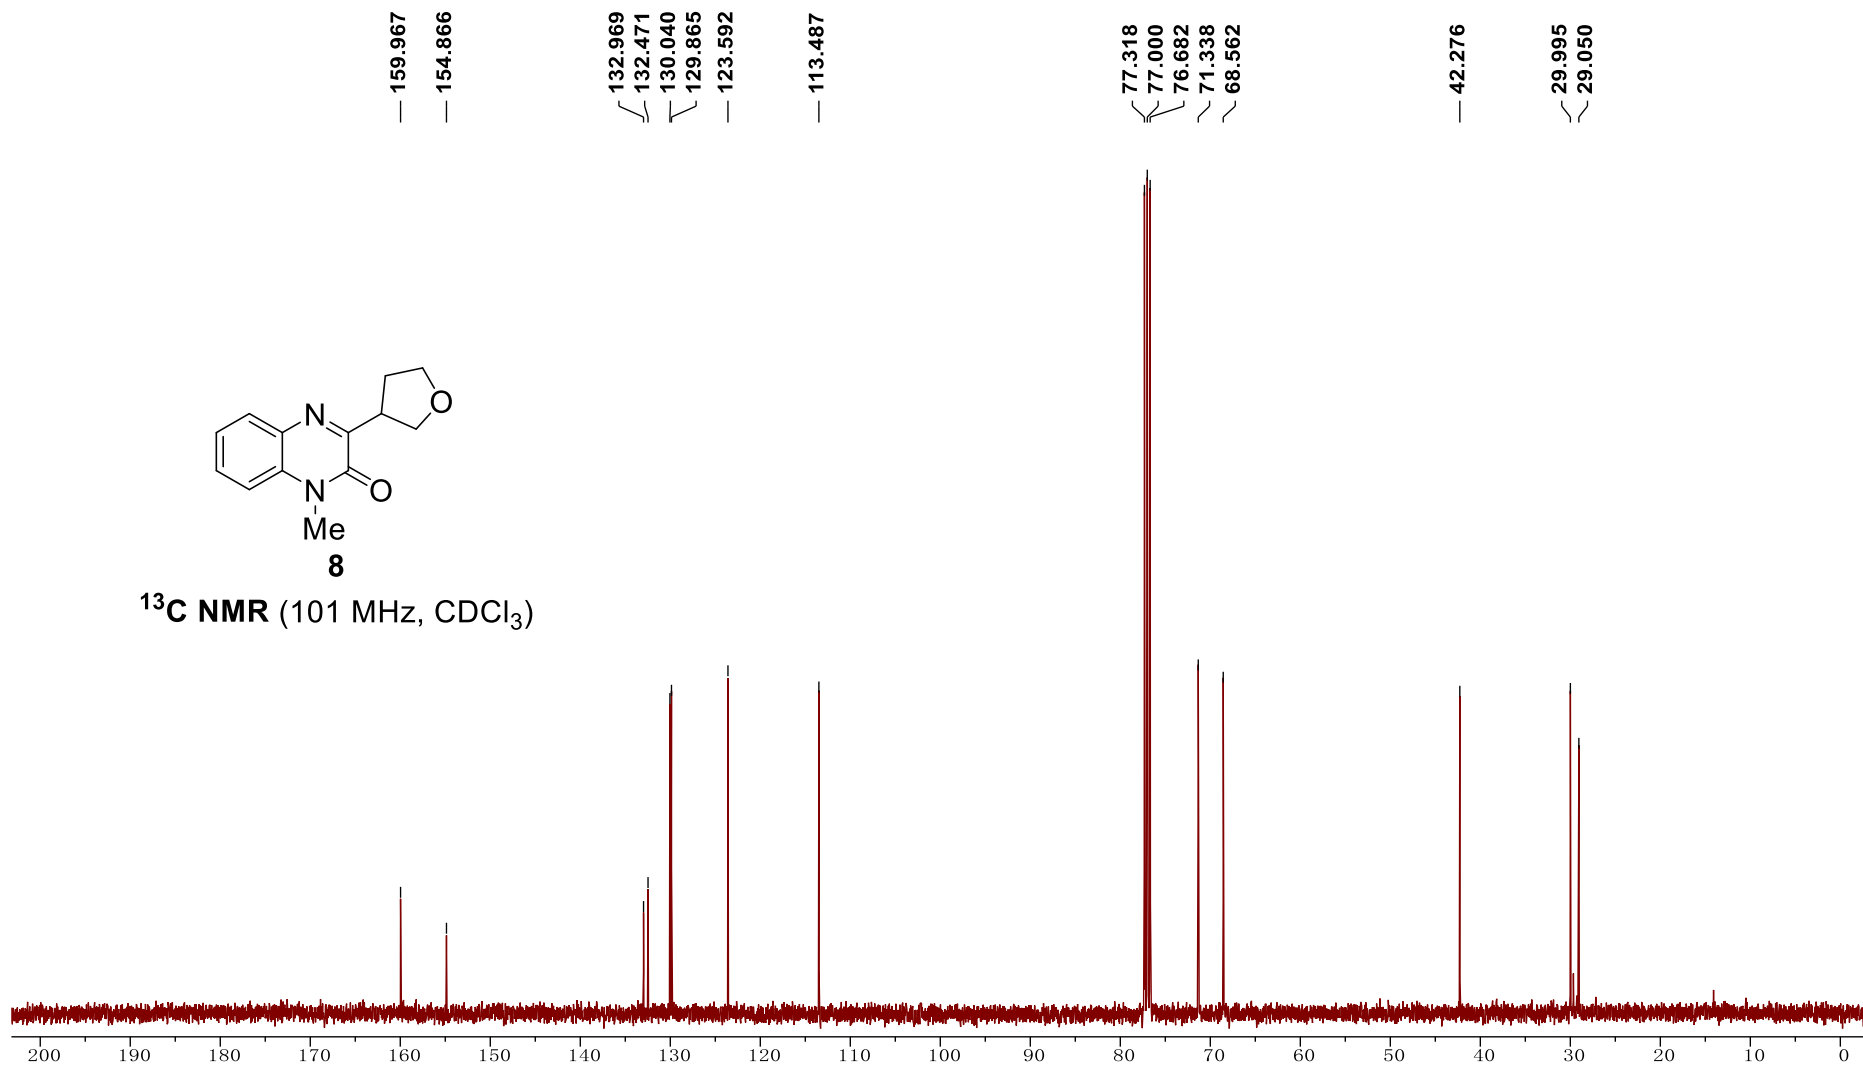

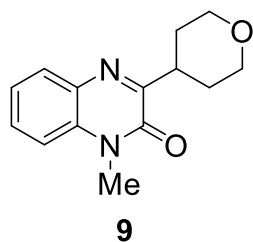

<sup>1</sup>H NMR (400 MHz, CDCl<sub>3</sub>)

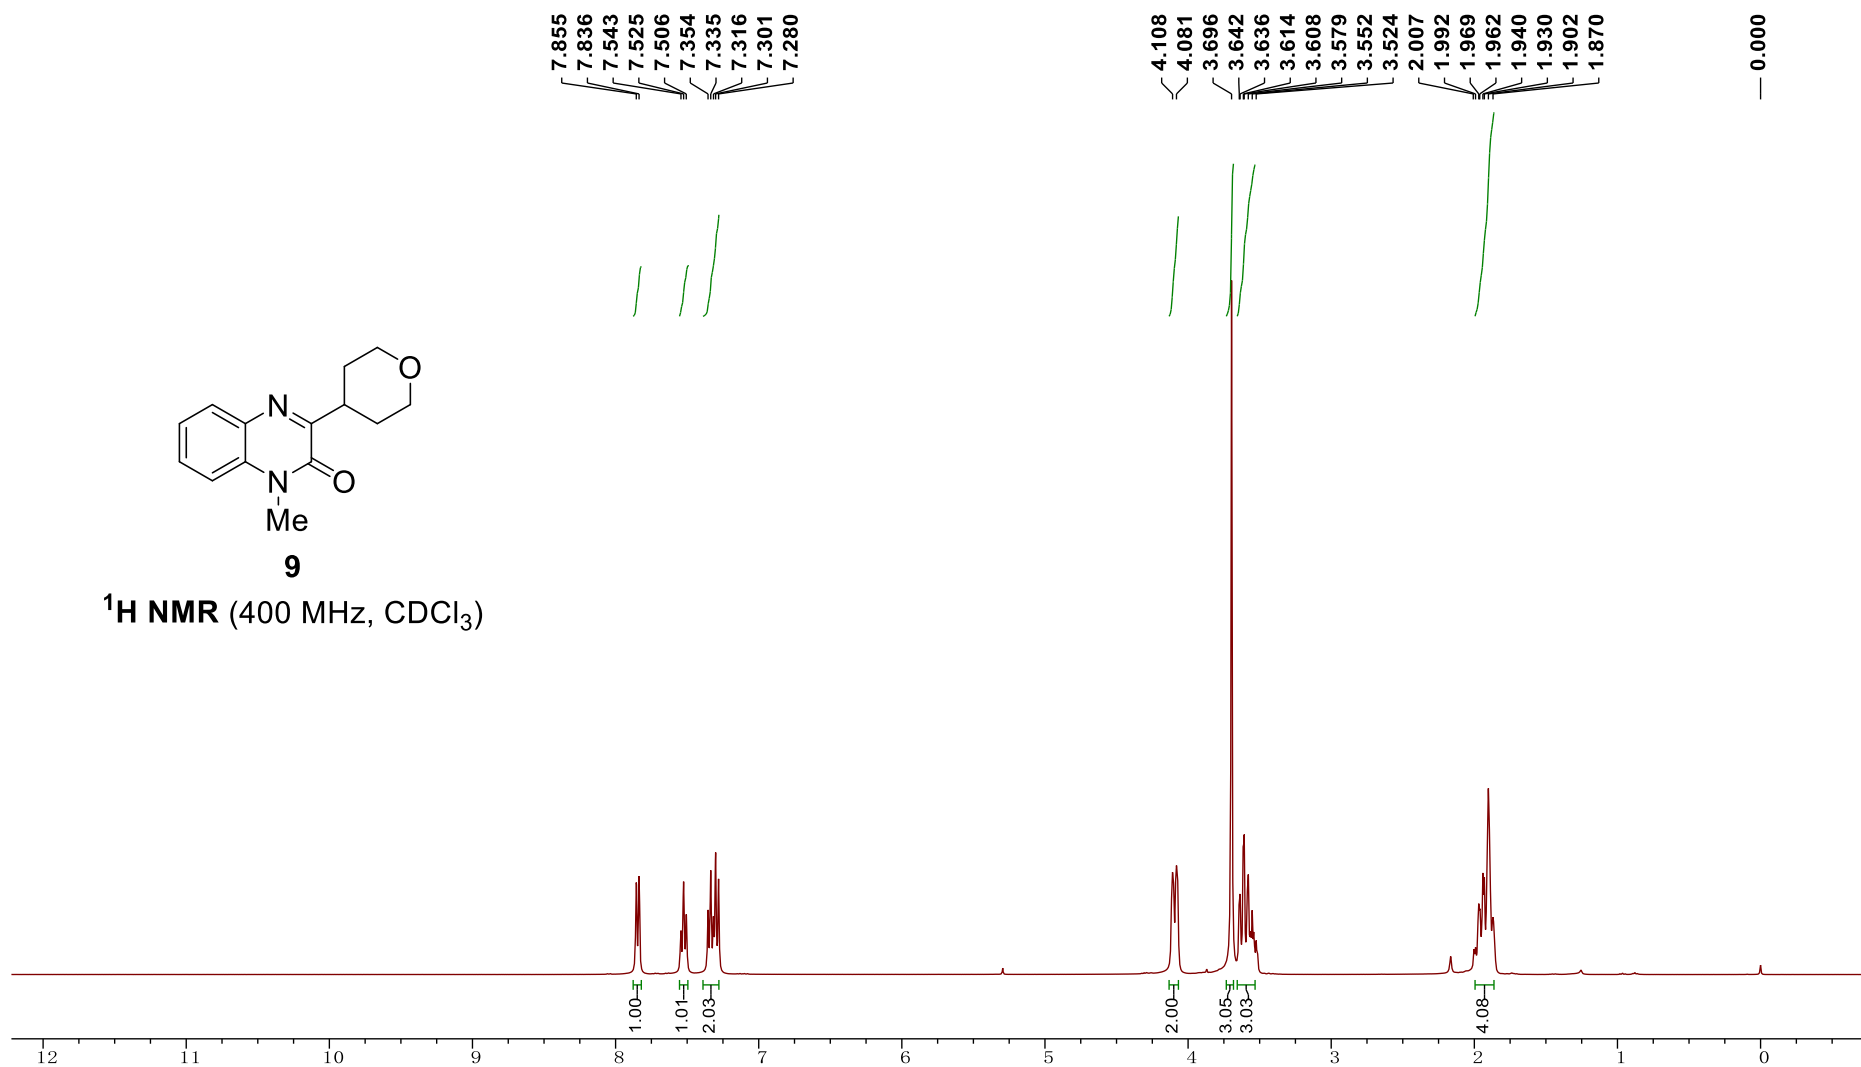

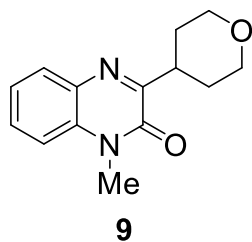

<sup>13</sup>C NMR (101 MHz, CDCl<sub>3</sub>)

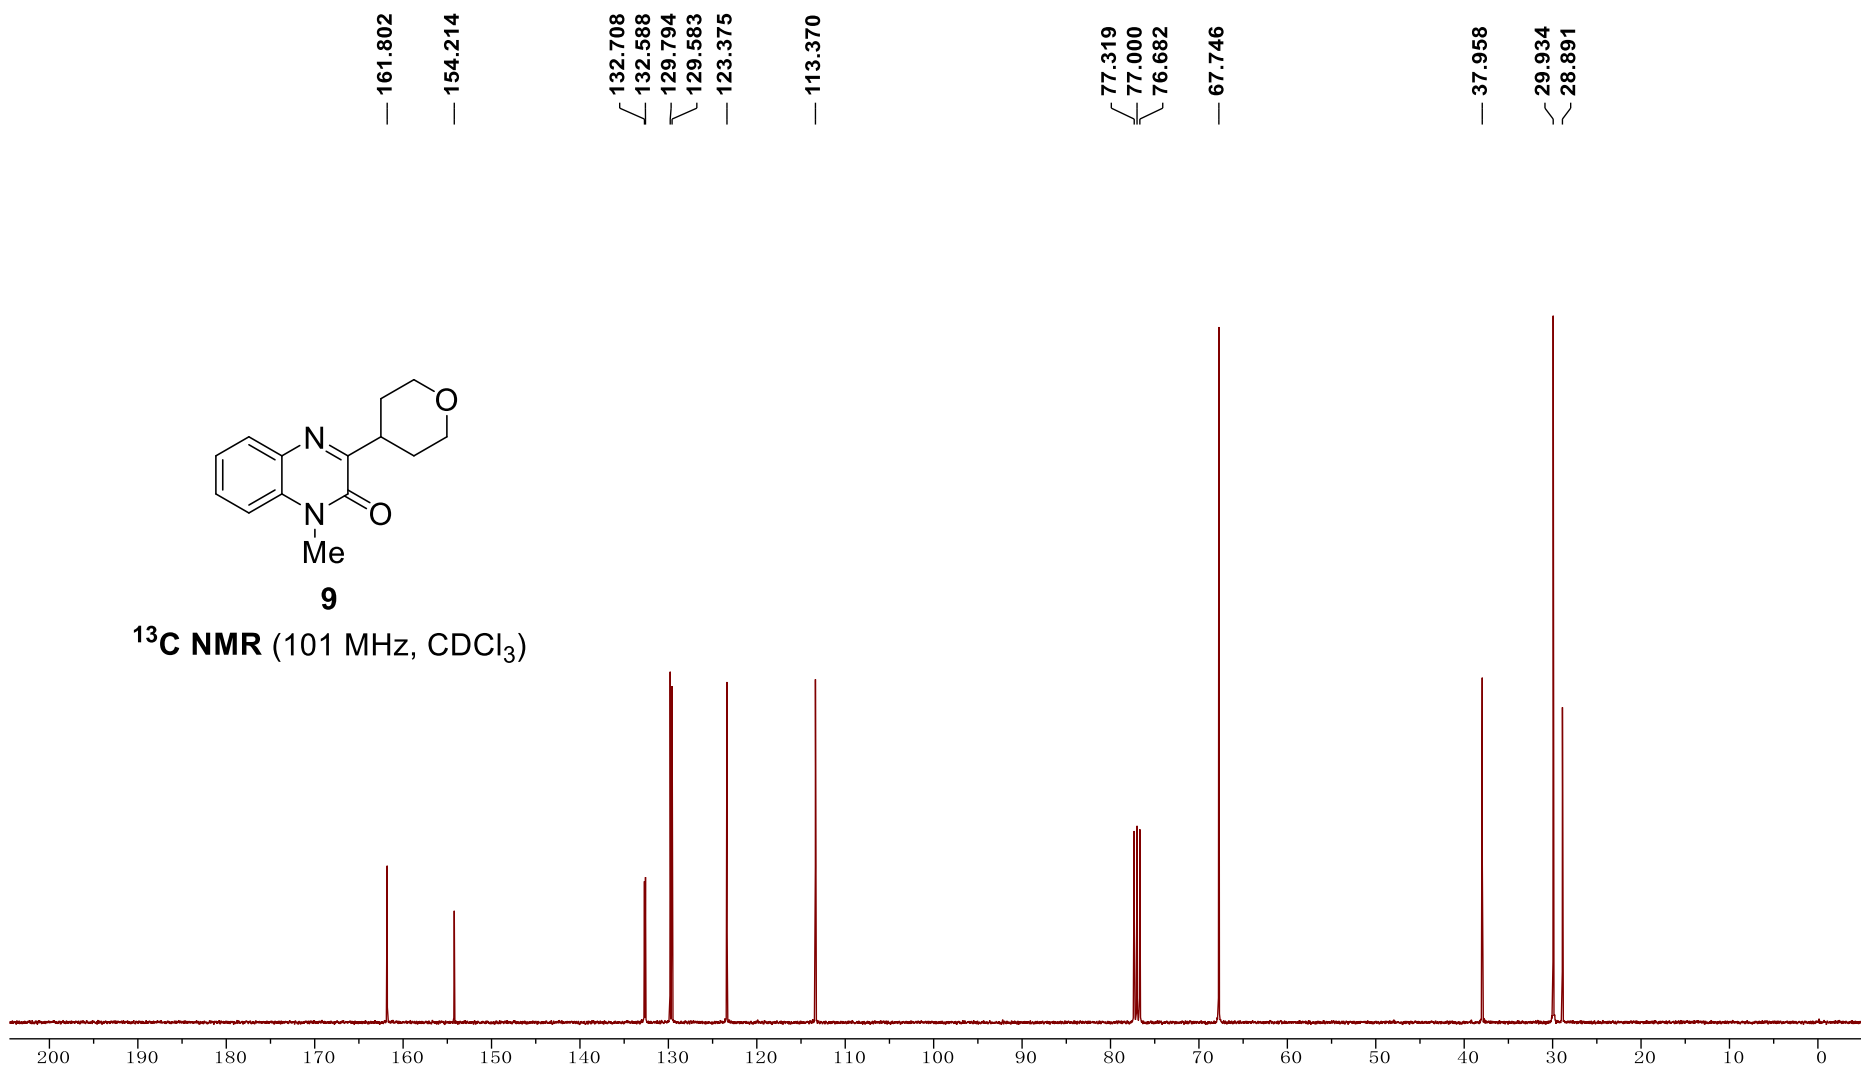

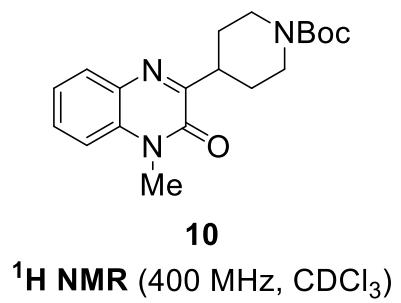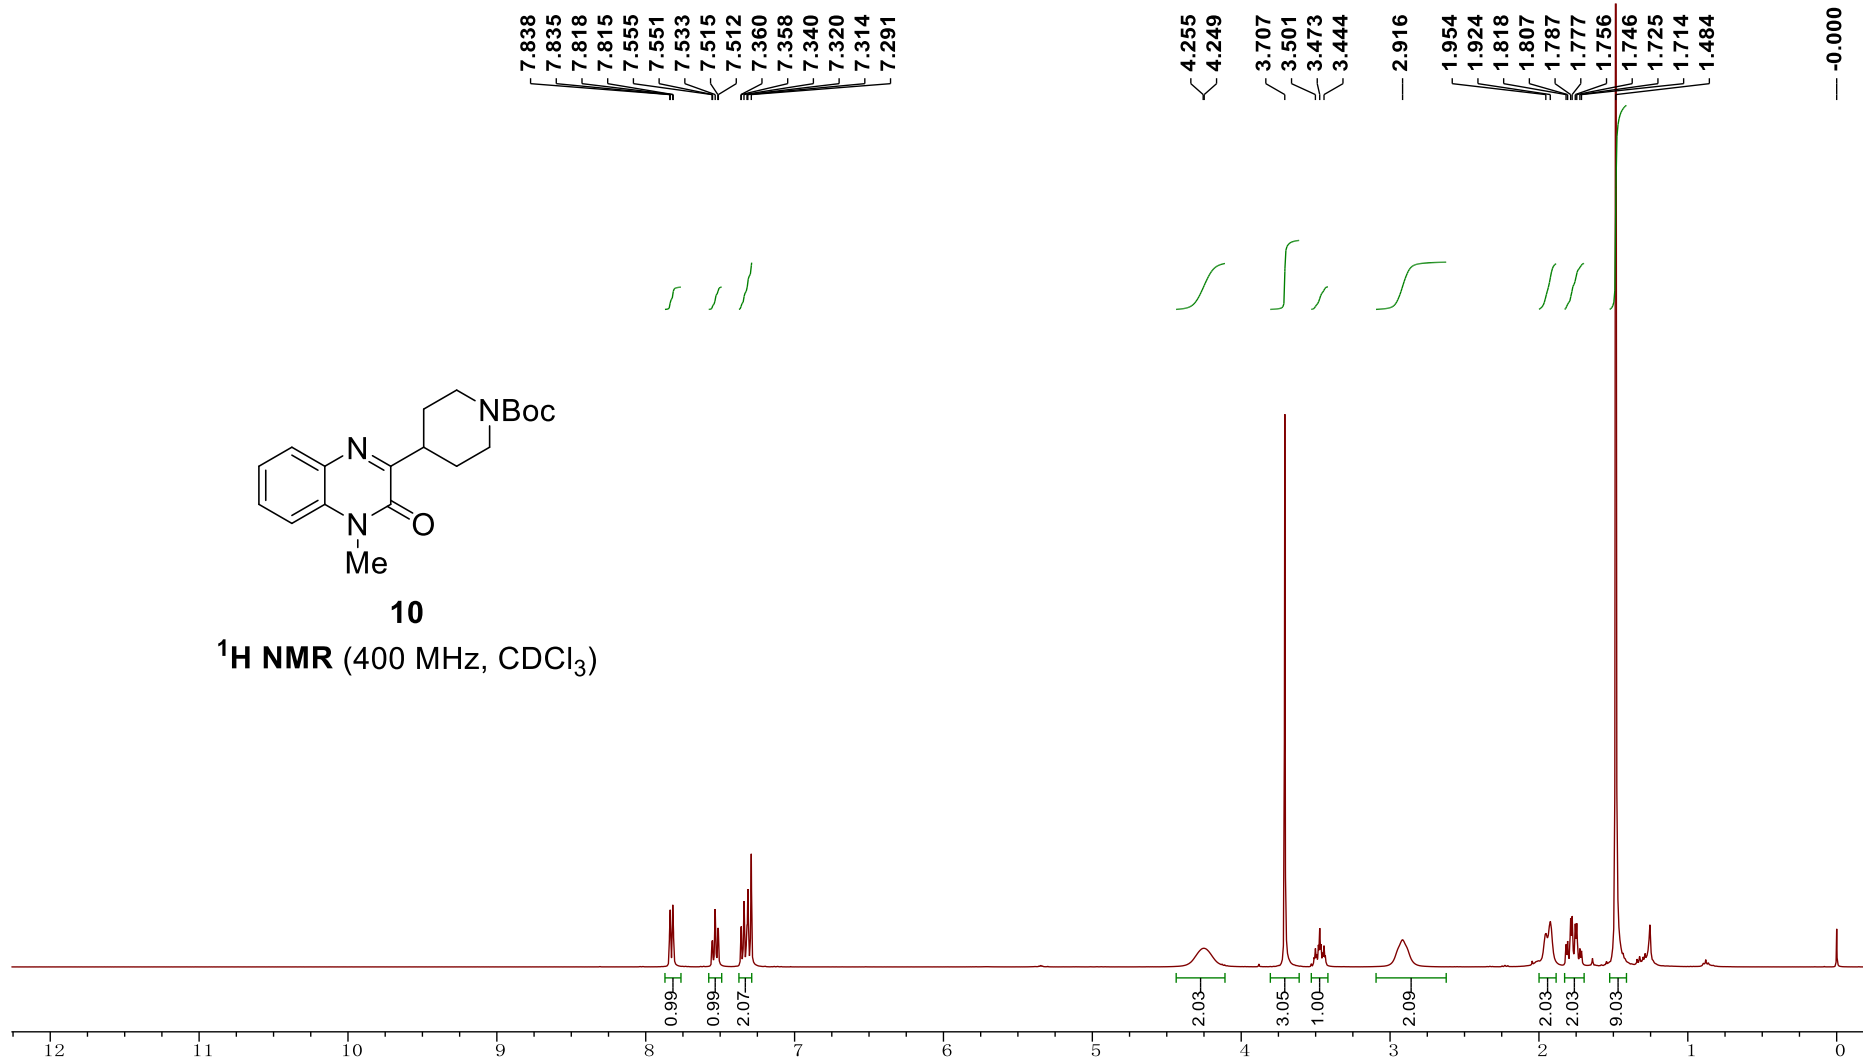



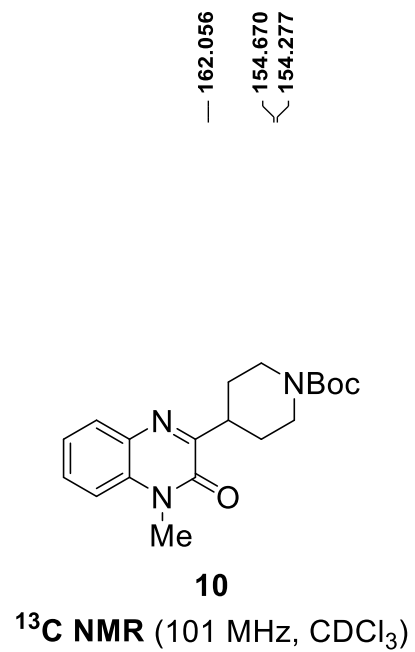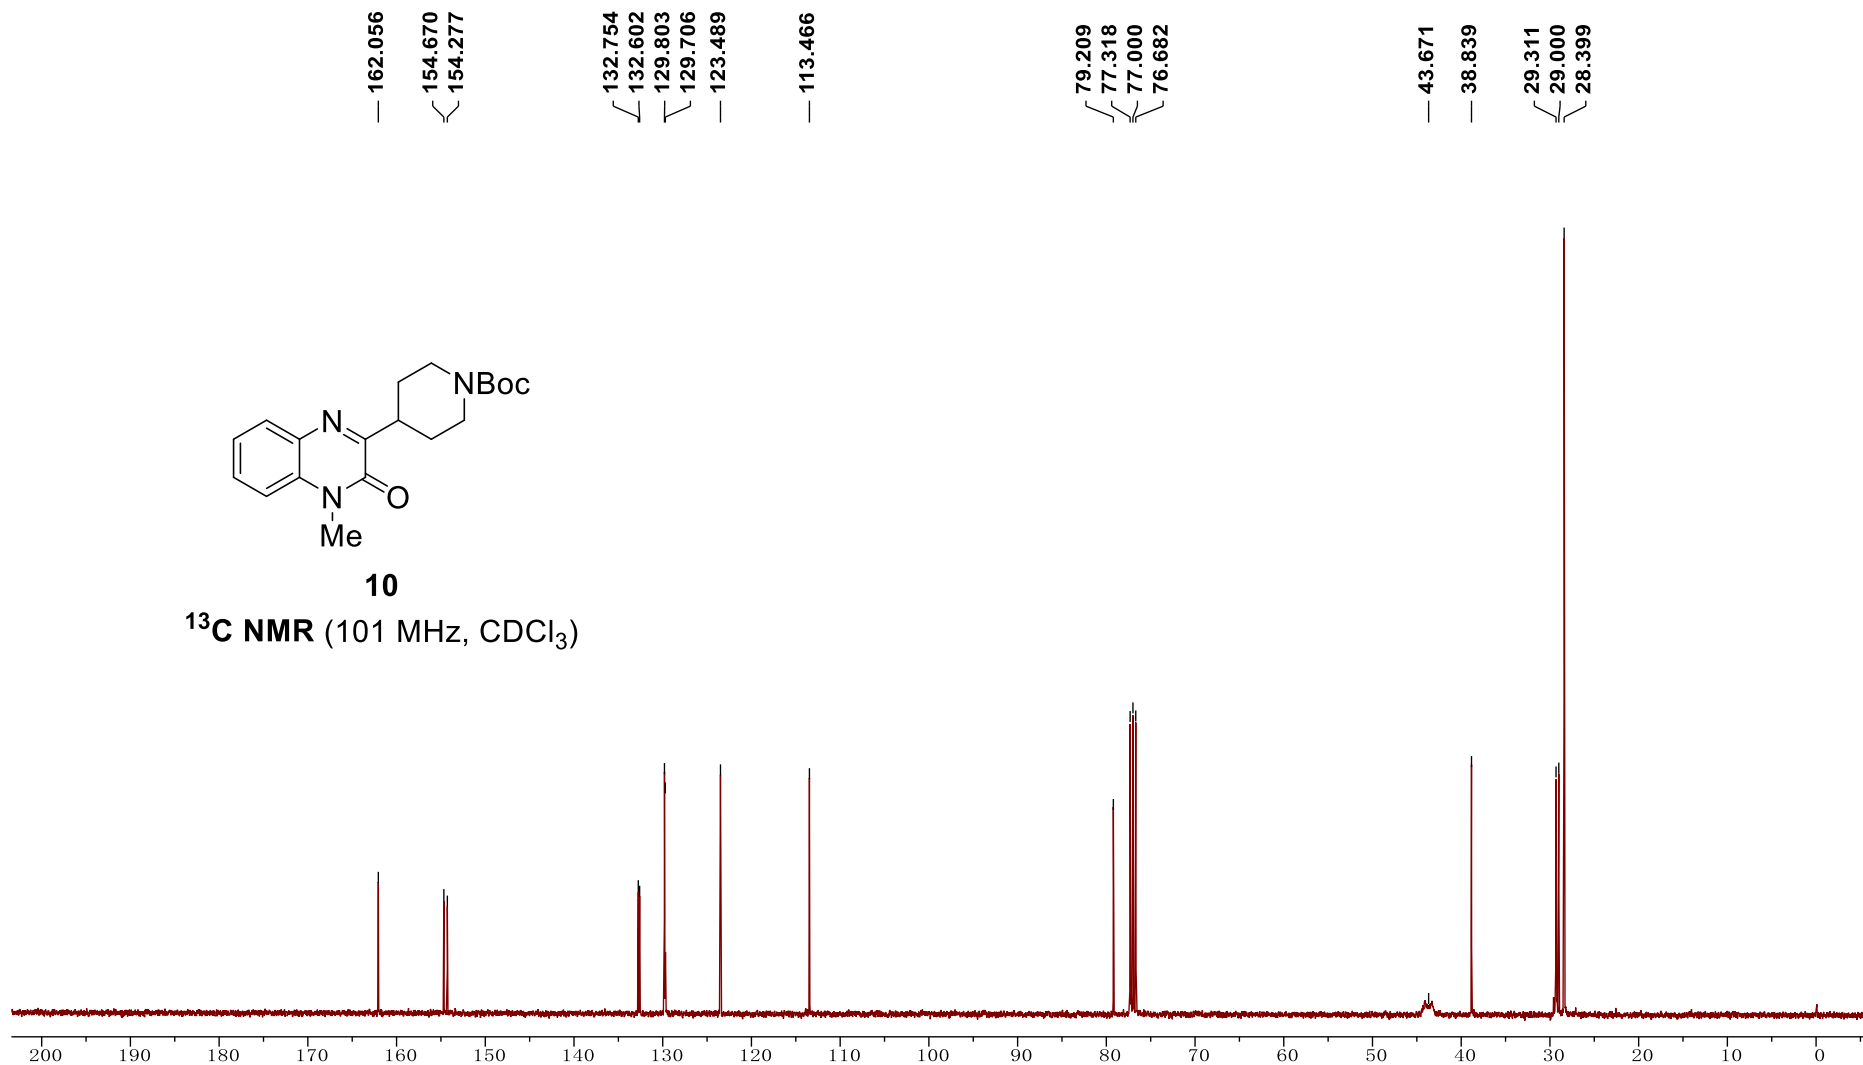

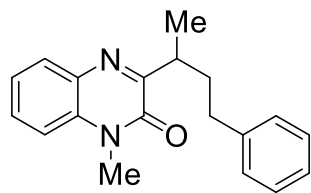

**11**

**<sup>1</sup>H NMR (400 MHz, CDCl<sub>3</sub>)**

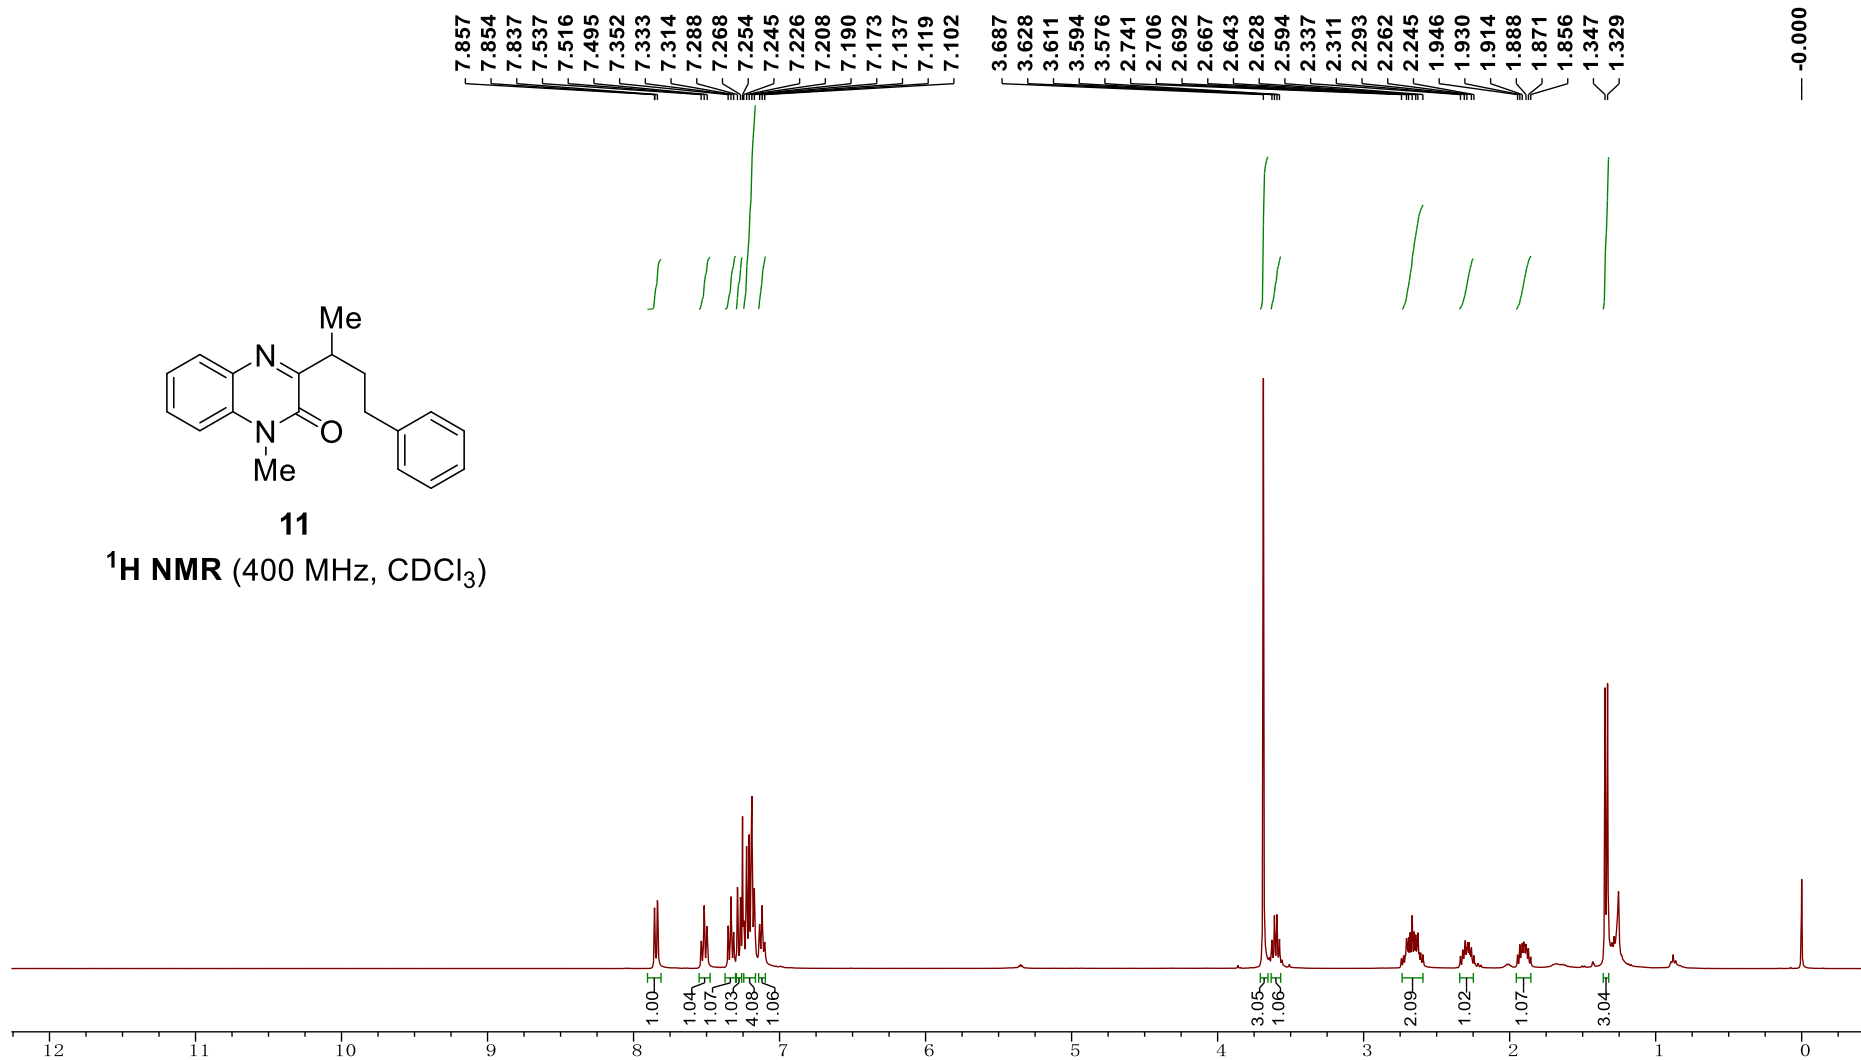

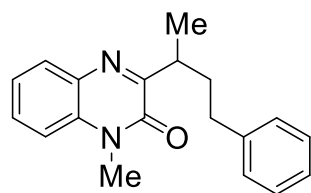

11

$^{13}\text{C}$  NMR (75 MHz,  $\text{CDCl}_3$ )

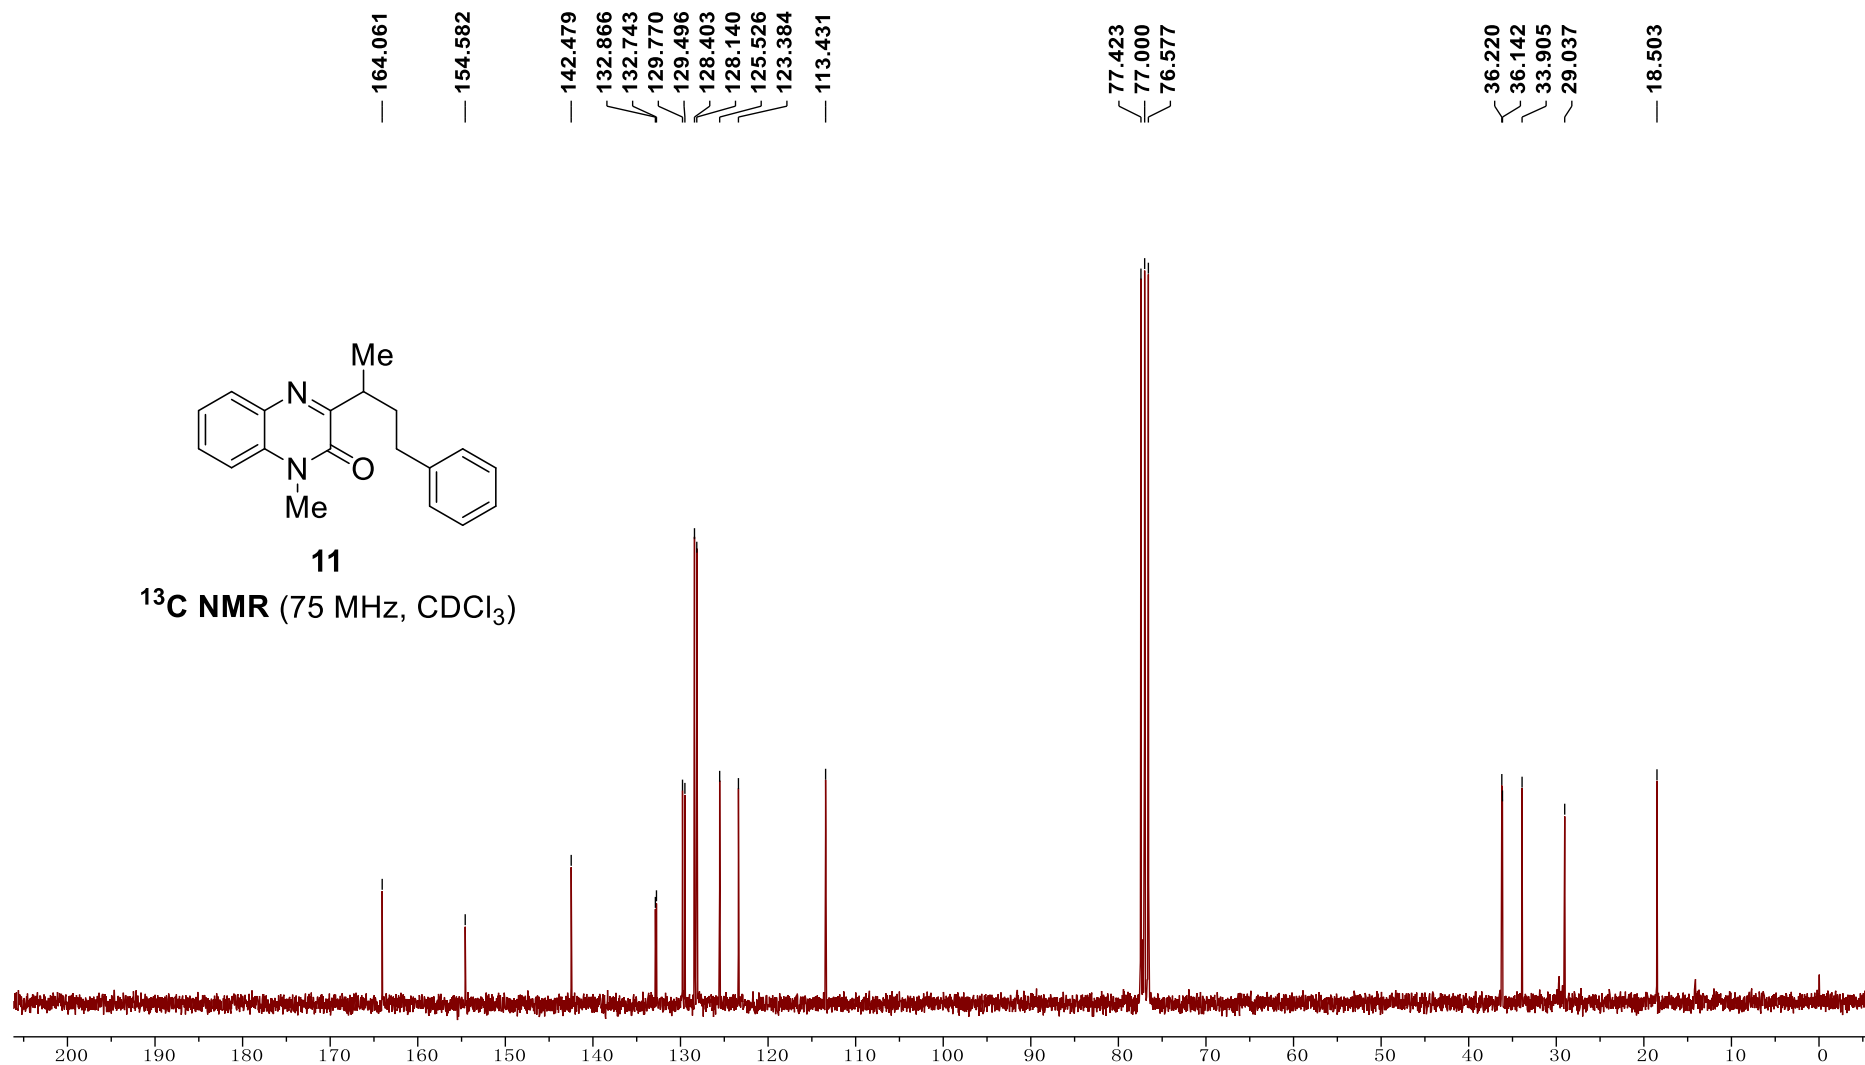

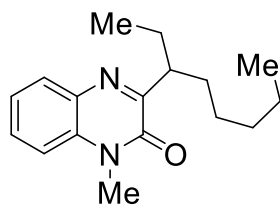

**12**

<sup>1</sup>H NMR (400 MHz, CDCl<sub>3</sub>)

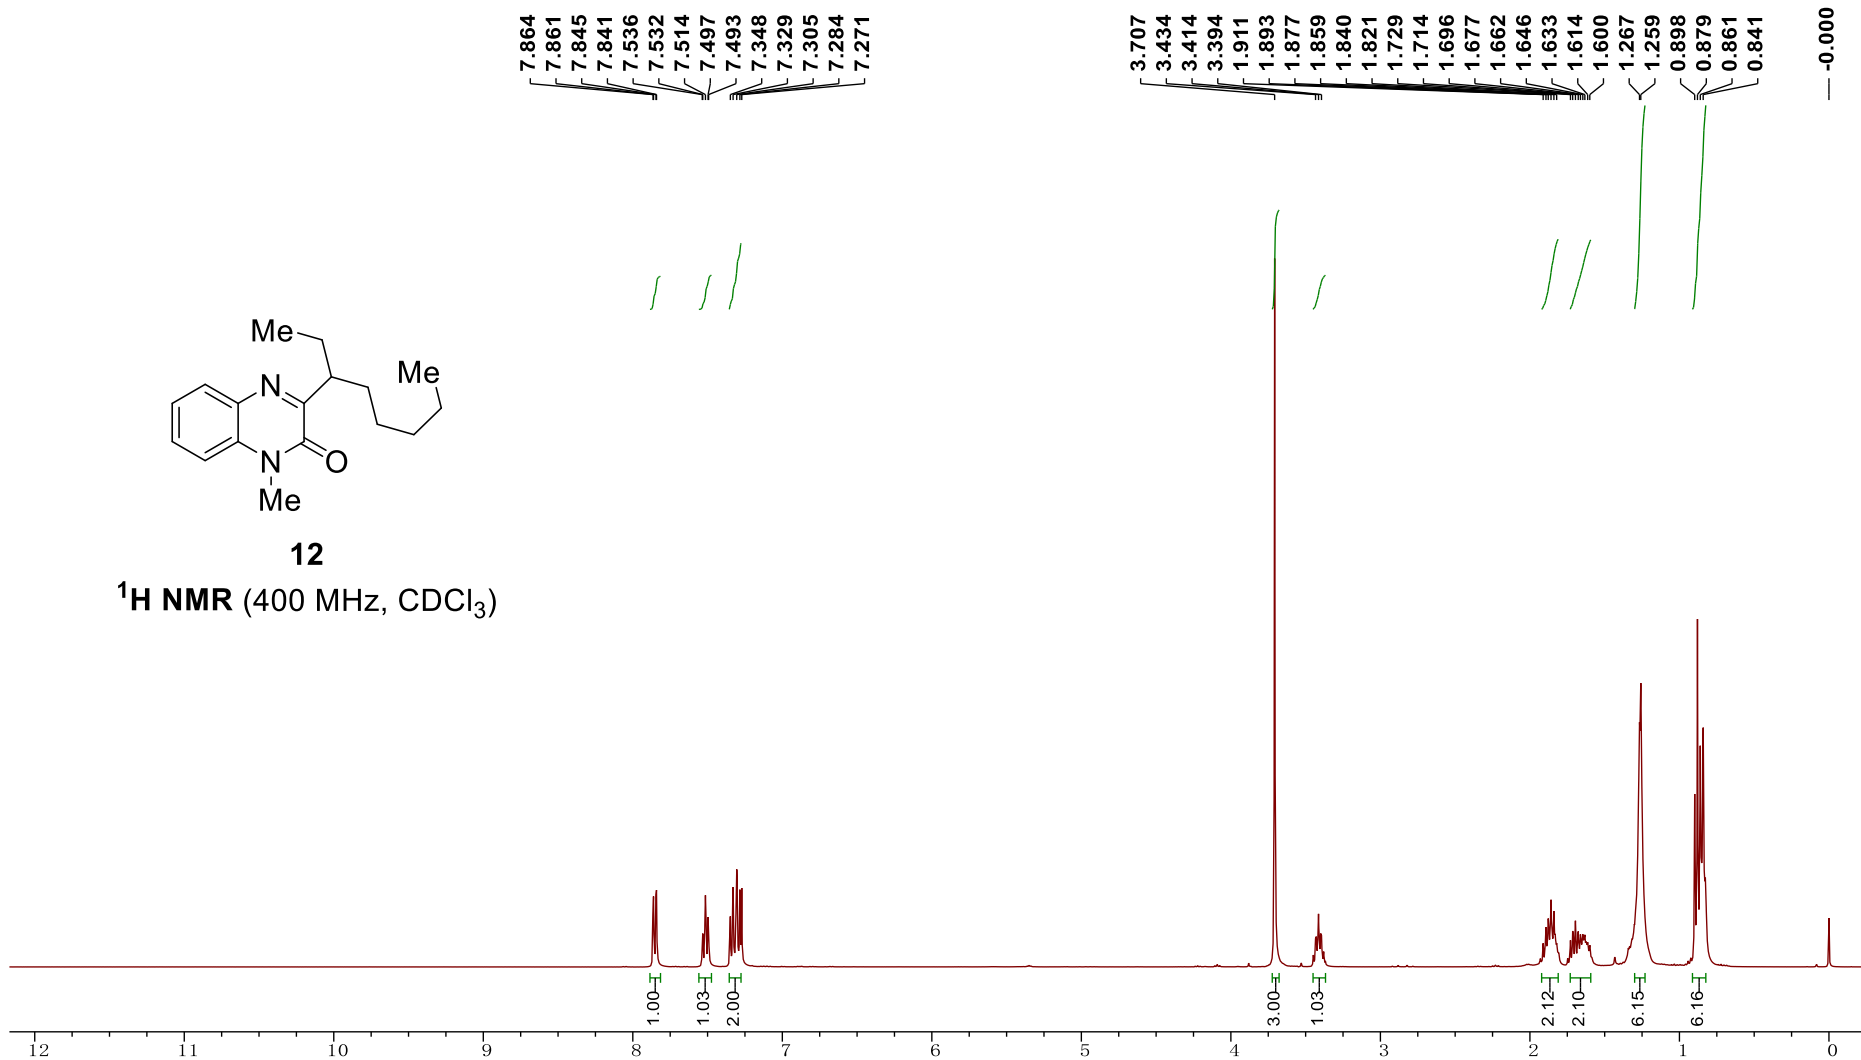

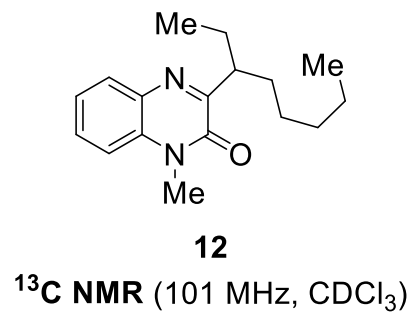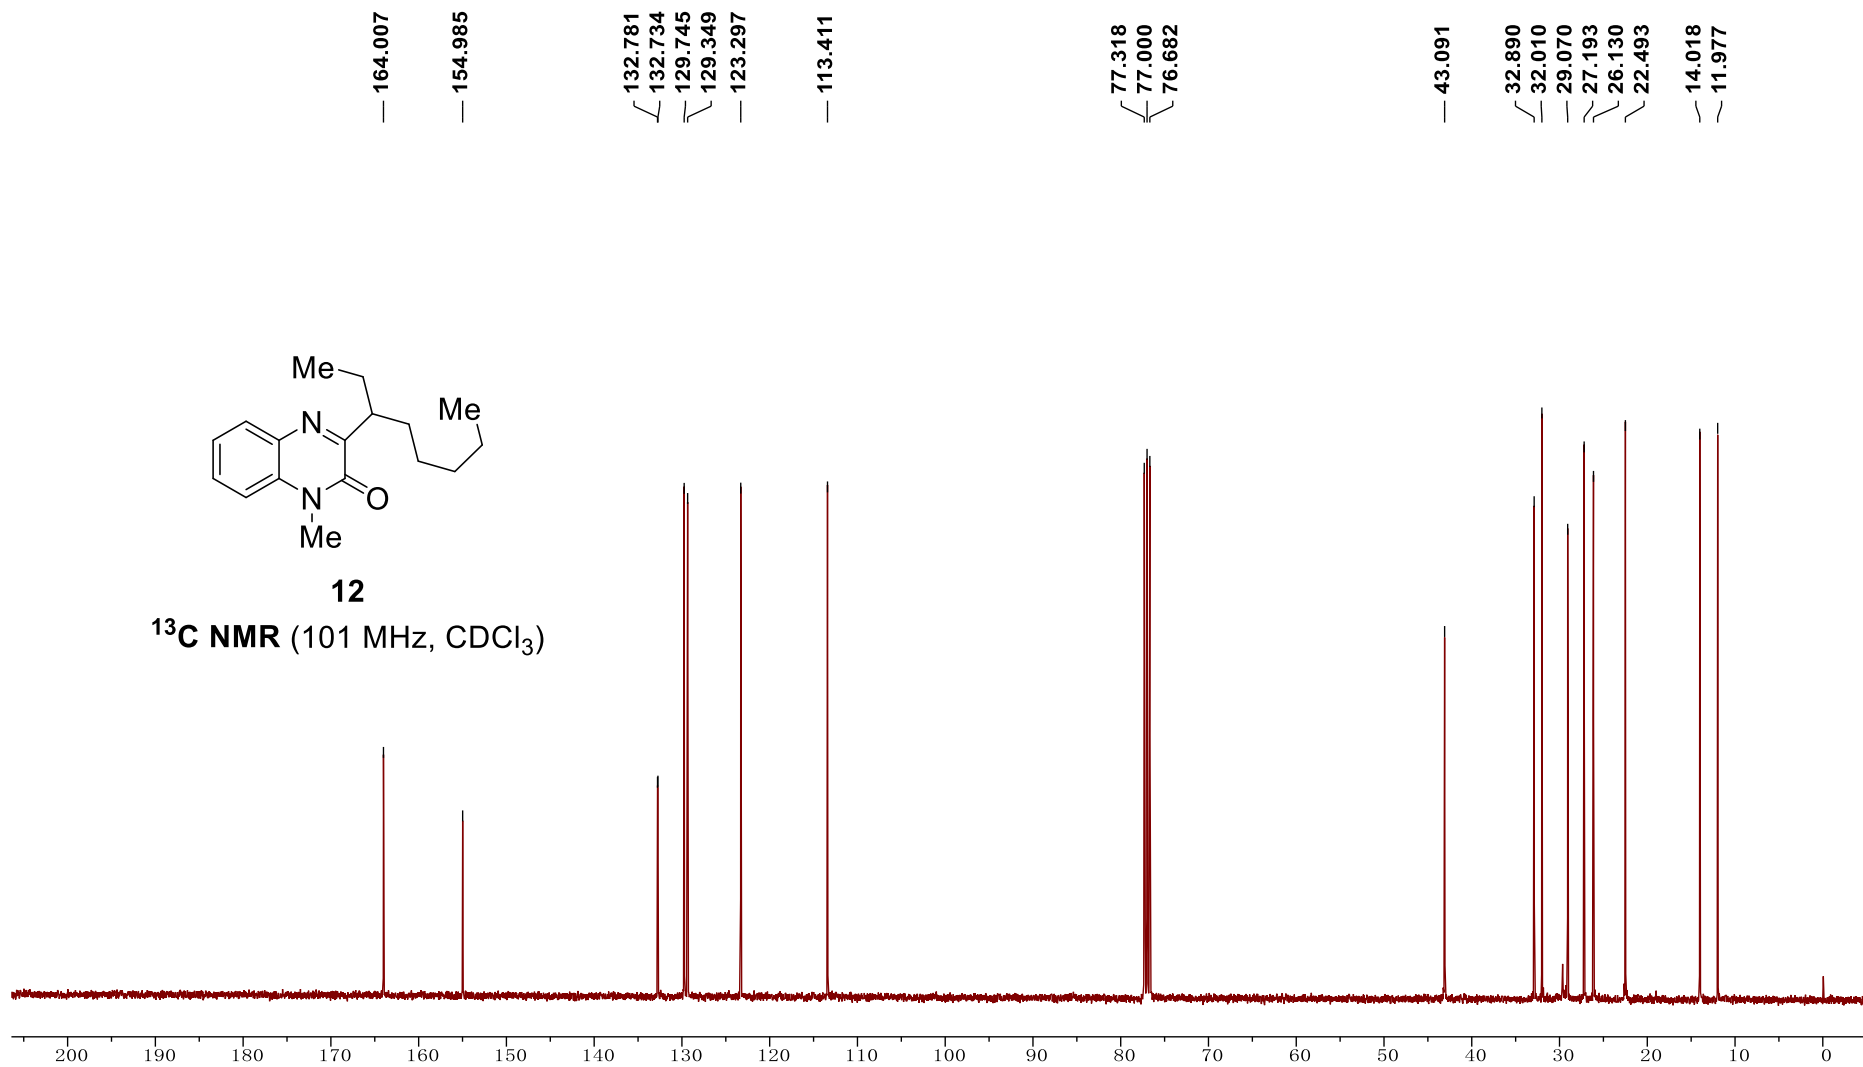

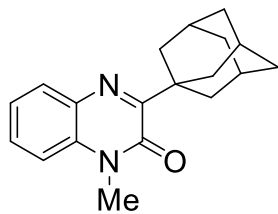

**13**

<sup>1</sup>H NMR (400 MHz, CDCl<sub>3</sub>)

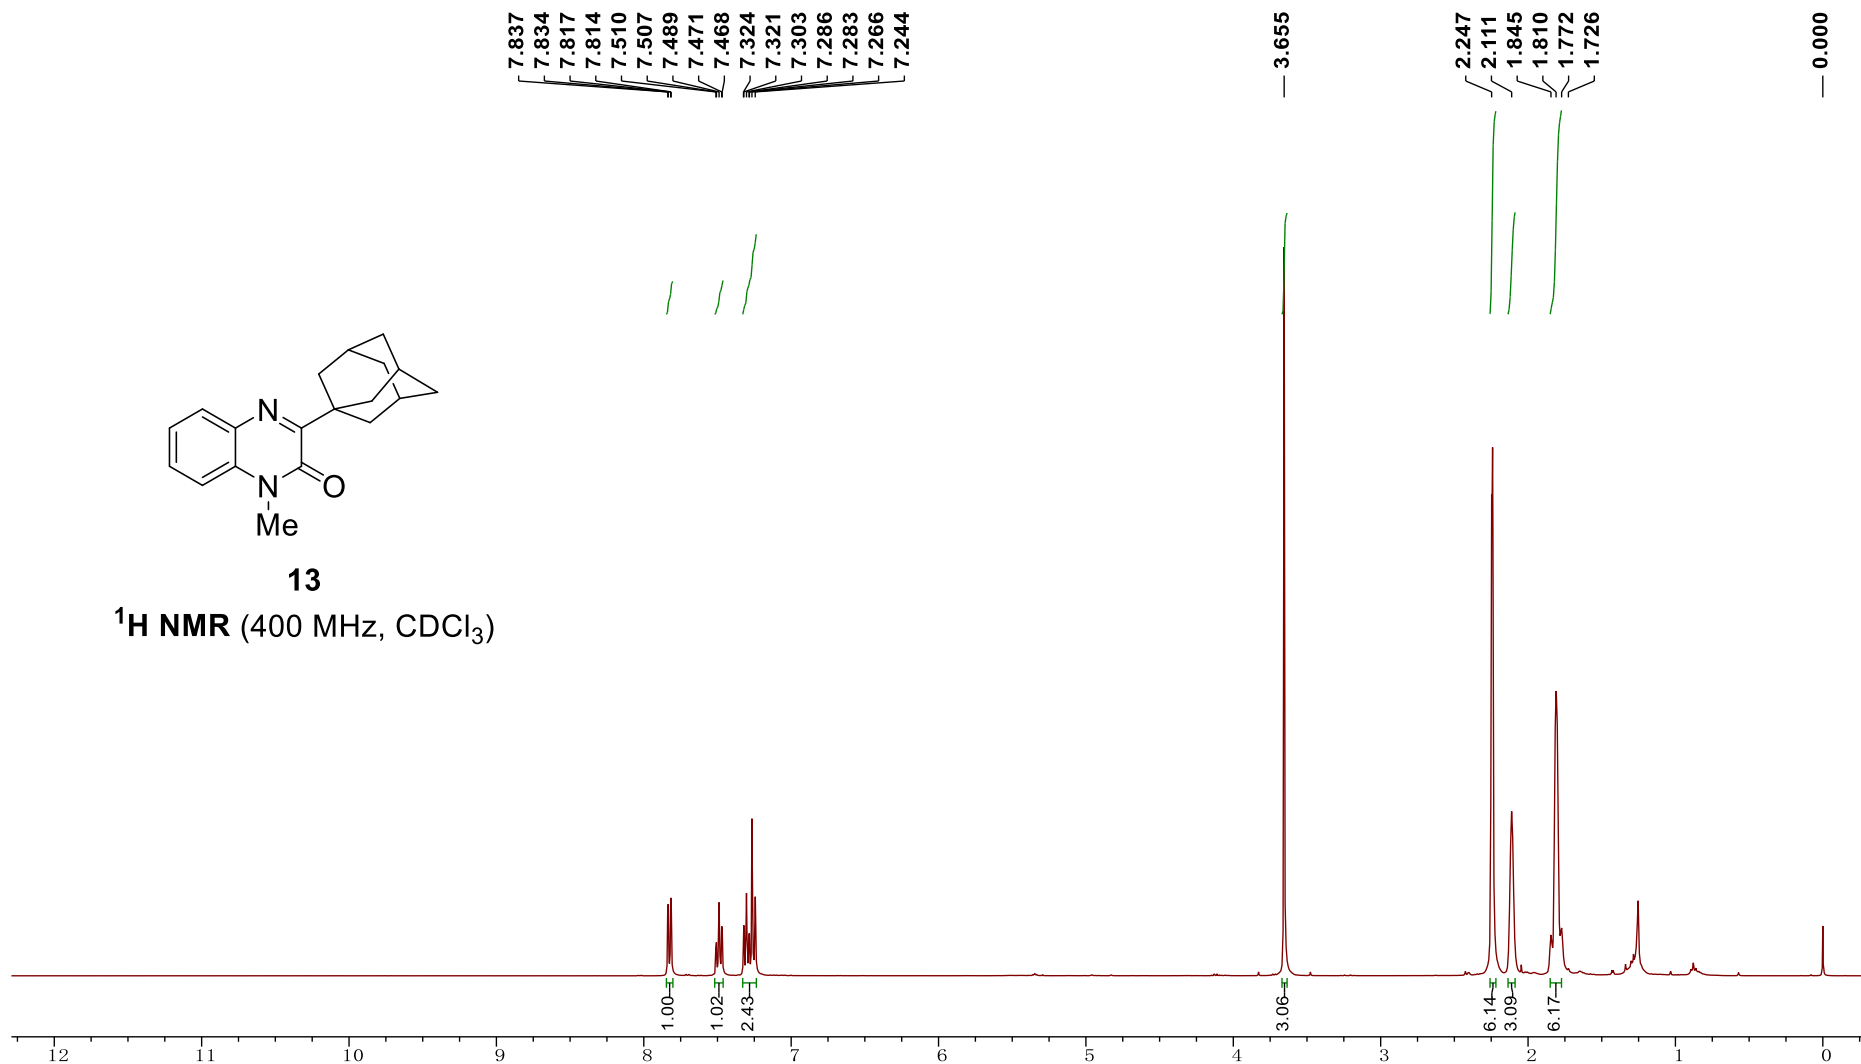

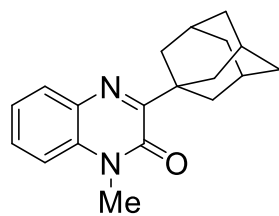

**13**

**<sup>13</sup>C NMR (101 MHz, CDCl<sub>3</sub>)**

— 164.655

— 153.541

— 132.928

— 132.316

— 129.989

— 129.389

— 123.091

— 113.157

— 77.318

— 77.000

— 76.683

— 41.869

— 38.738

— 36.923

— 28.571

— 28.472

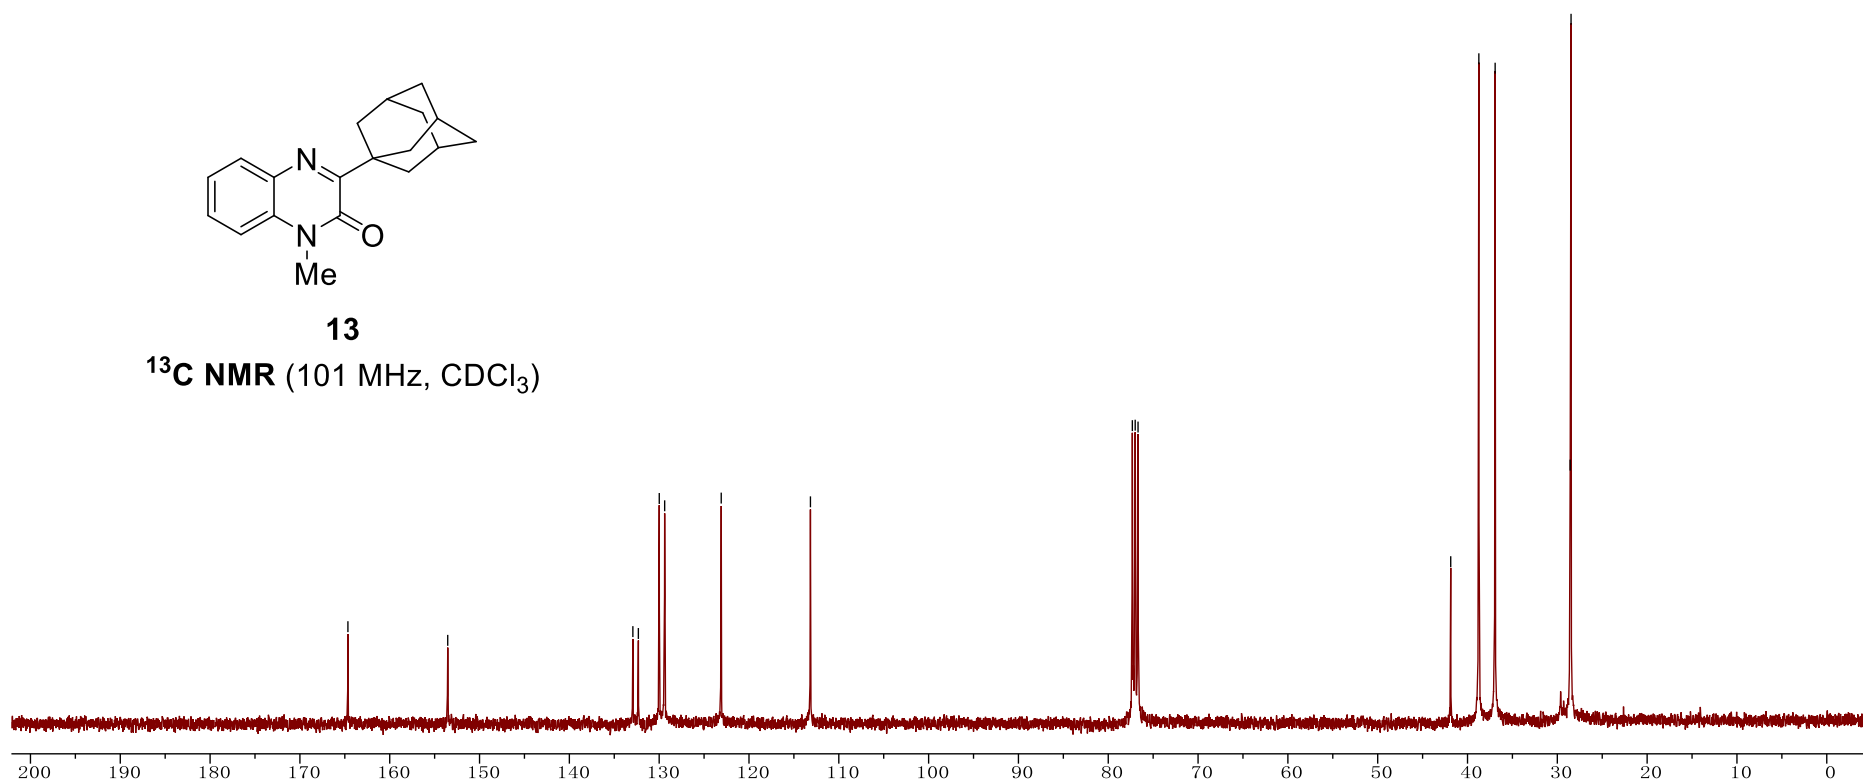

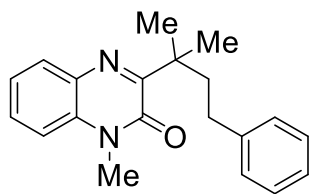

14

<sup>1</sup>H NMR (400 MHz, CDCl<sub>3</sub>)

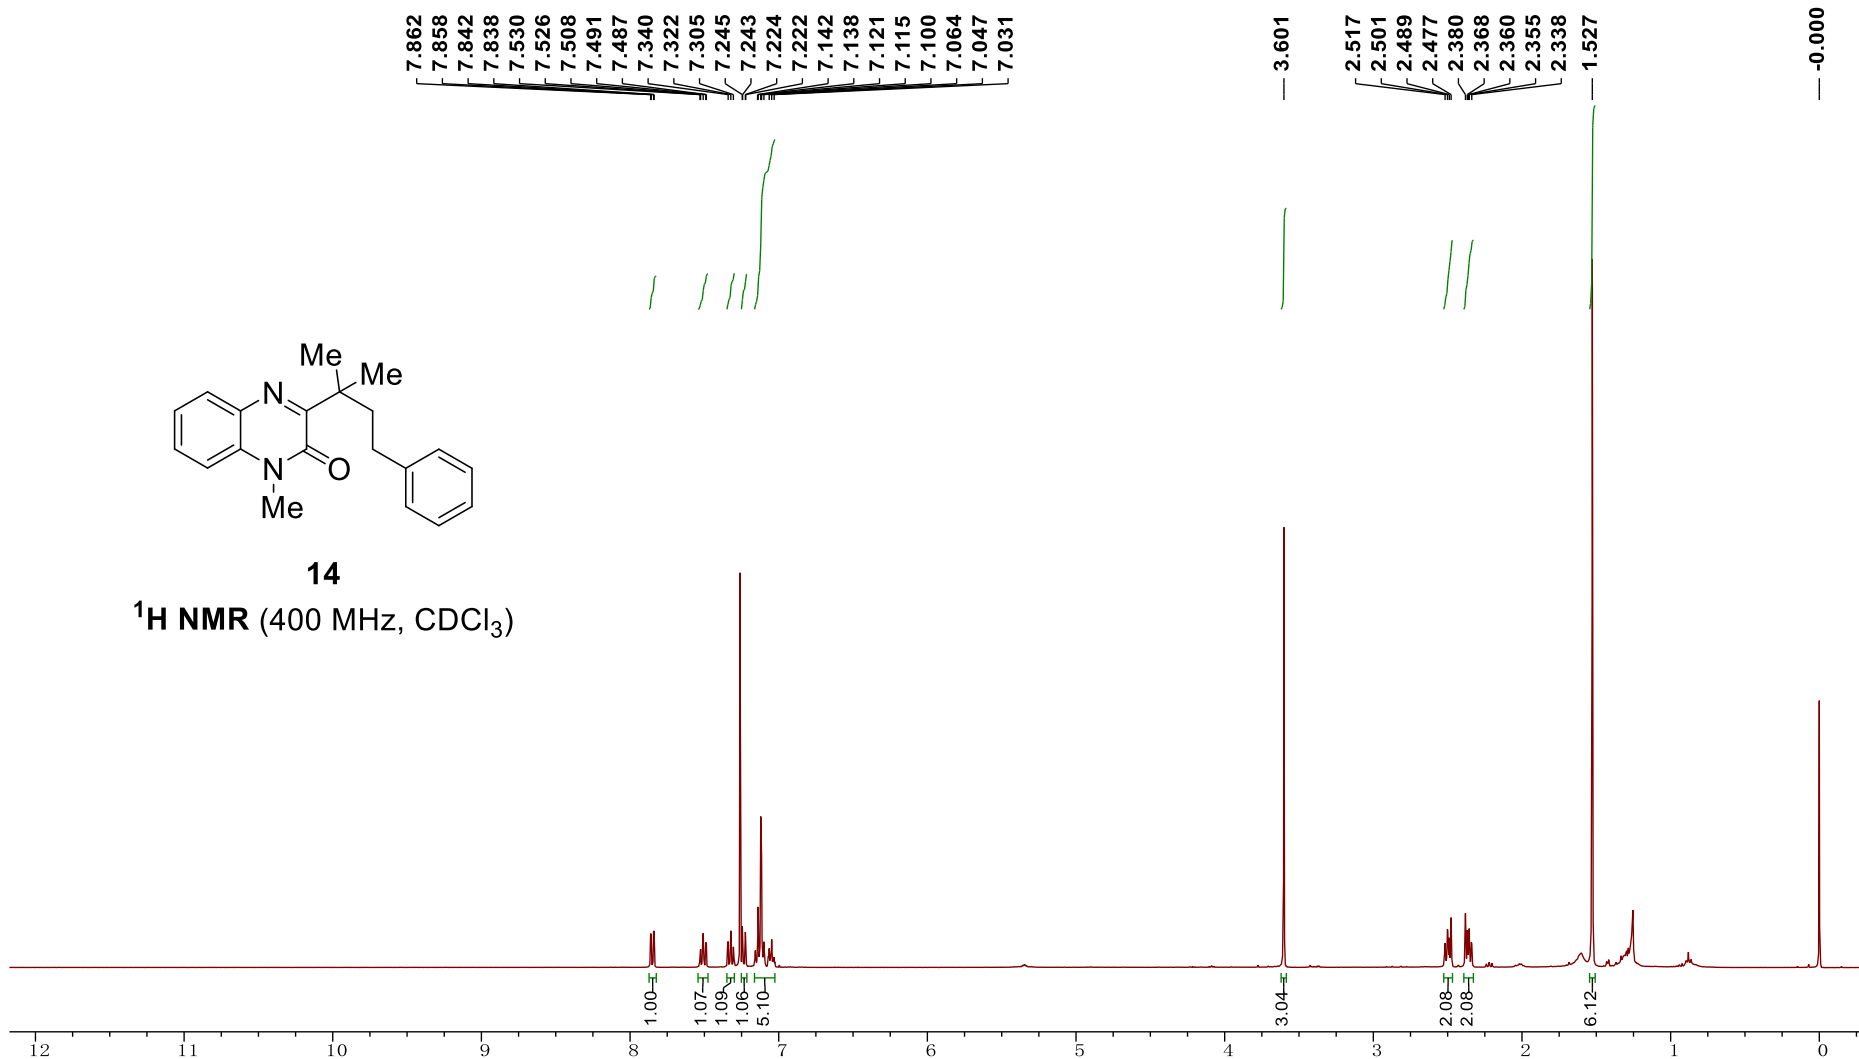



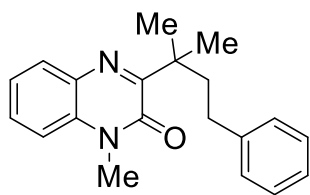

14

<sup>13</sup>C NMR (101 MHz, CDCl<sub>3</sub>)

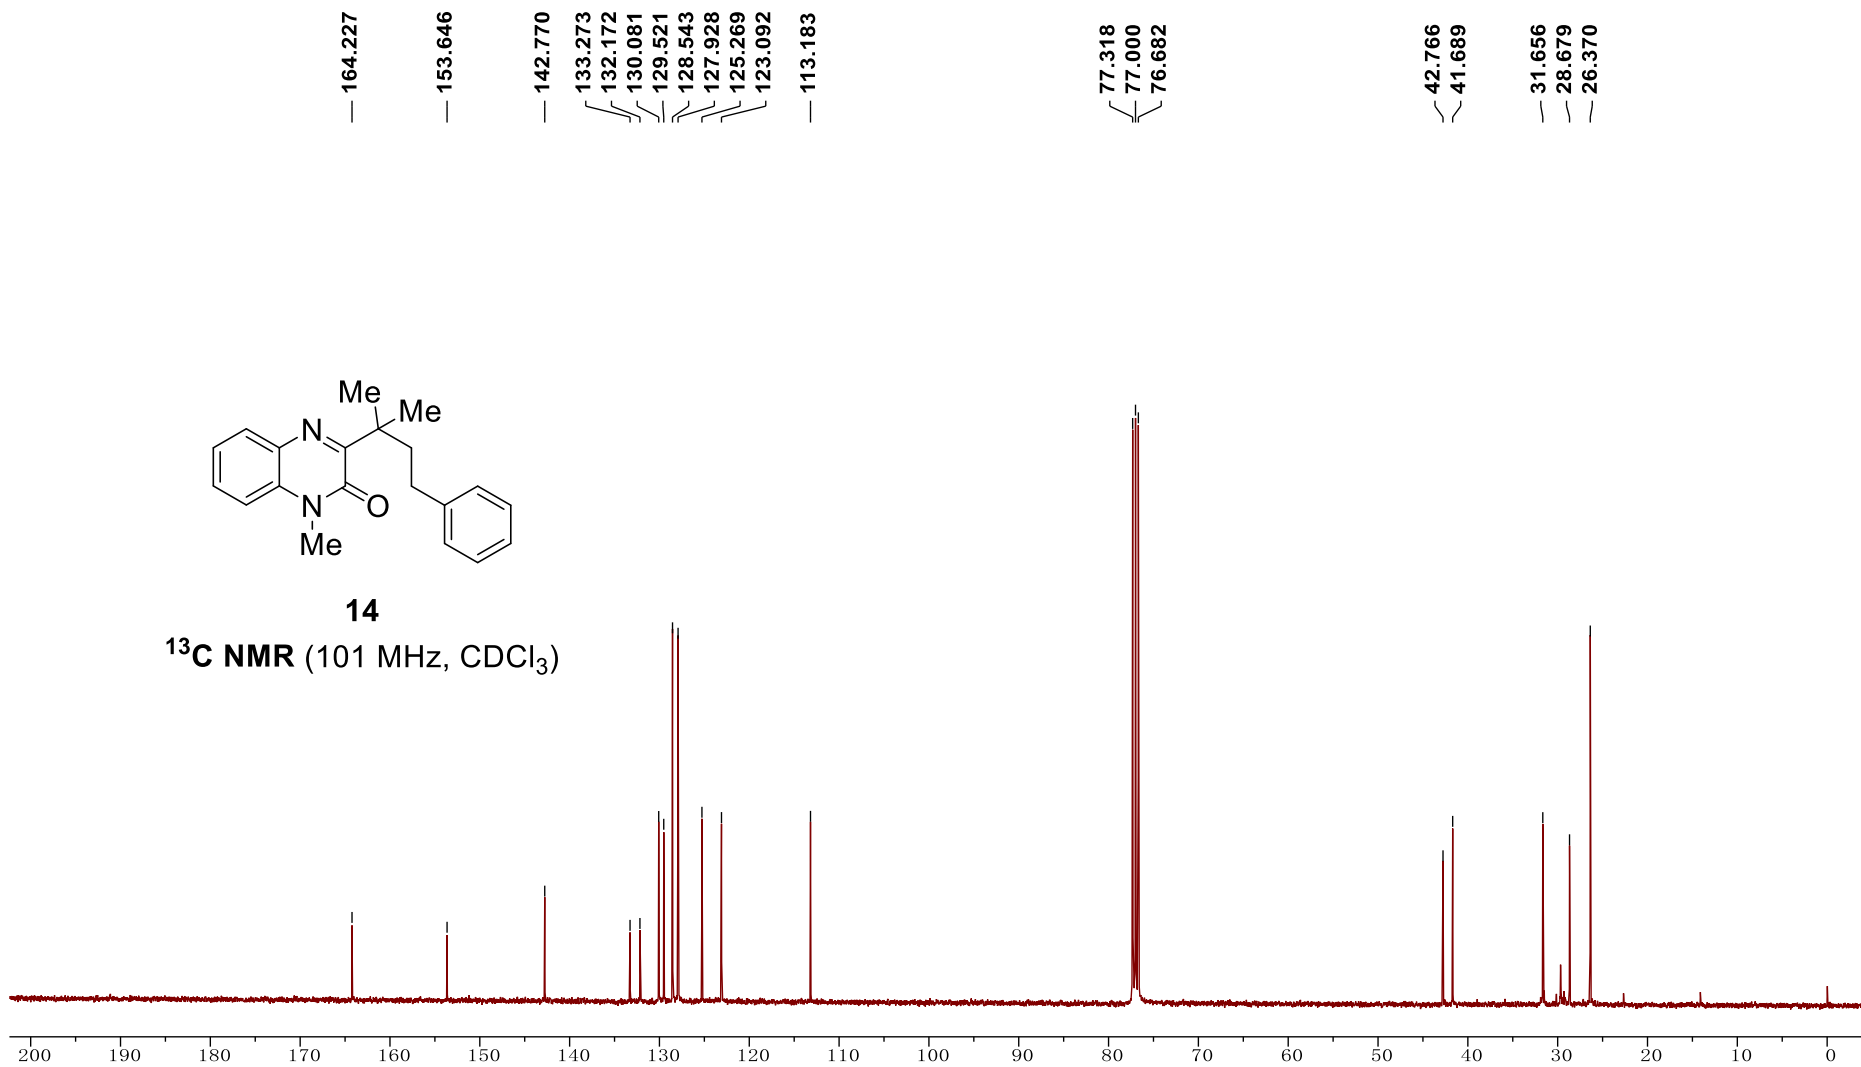

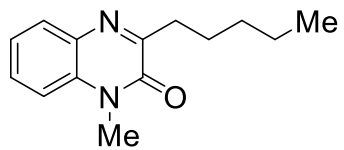

15

$^1\text{H}$  NMR (400 MHz,  $\text{CDCl}_3$ )

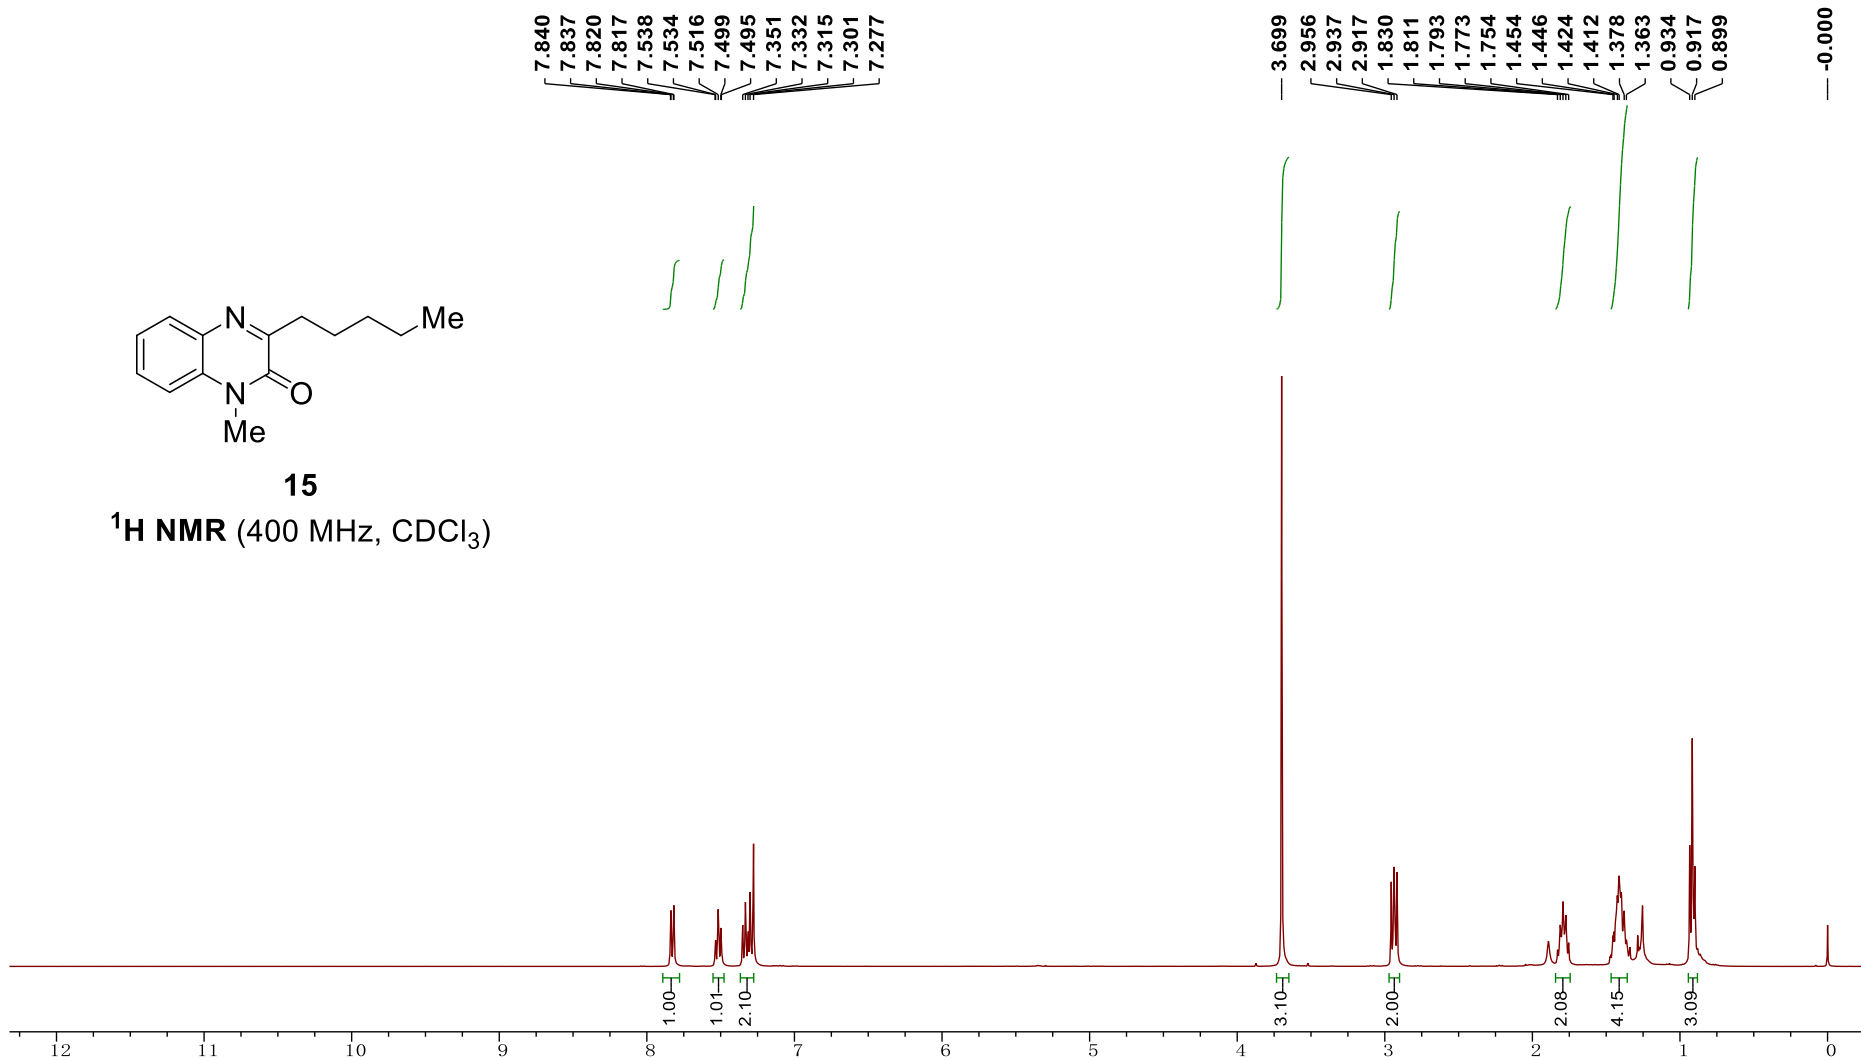

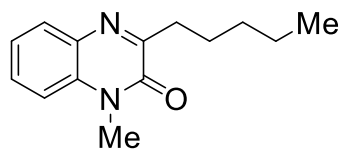

**15**

**$^{13}\text{C}$  NMR (101 MHz,  $\text{CDCl}_3$ )**

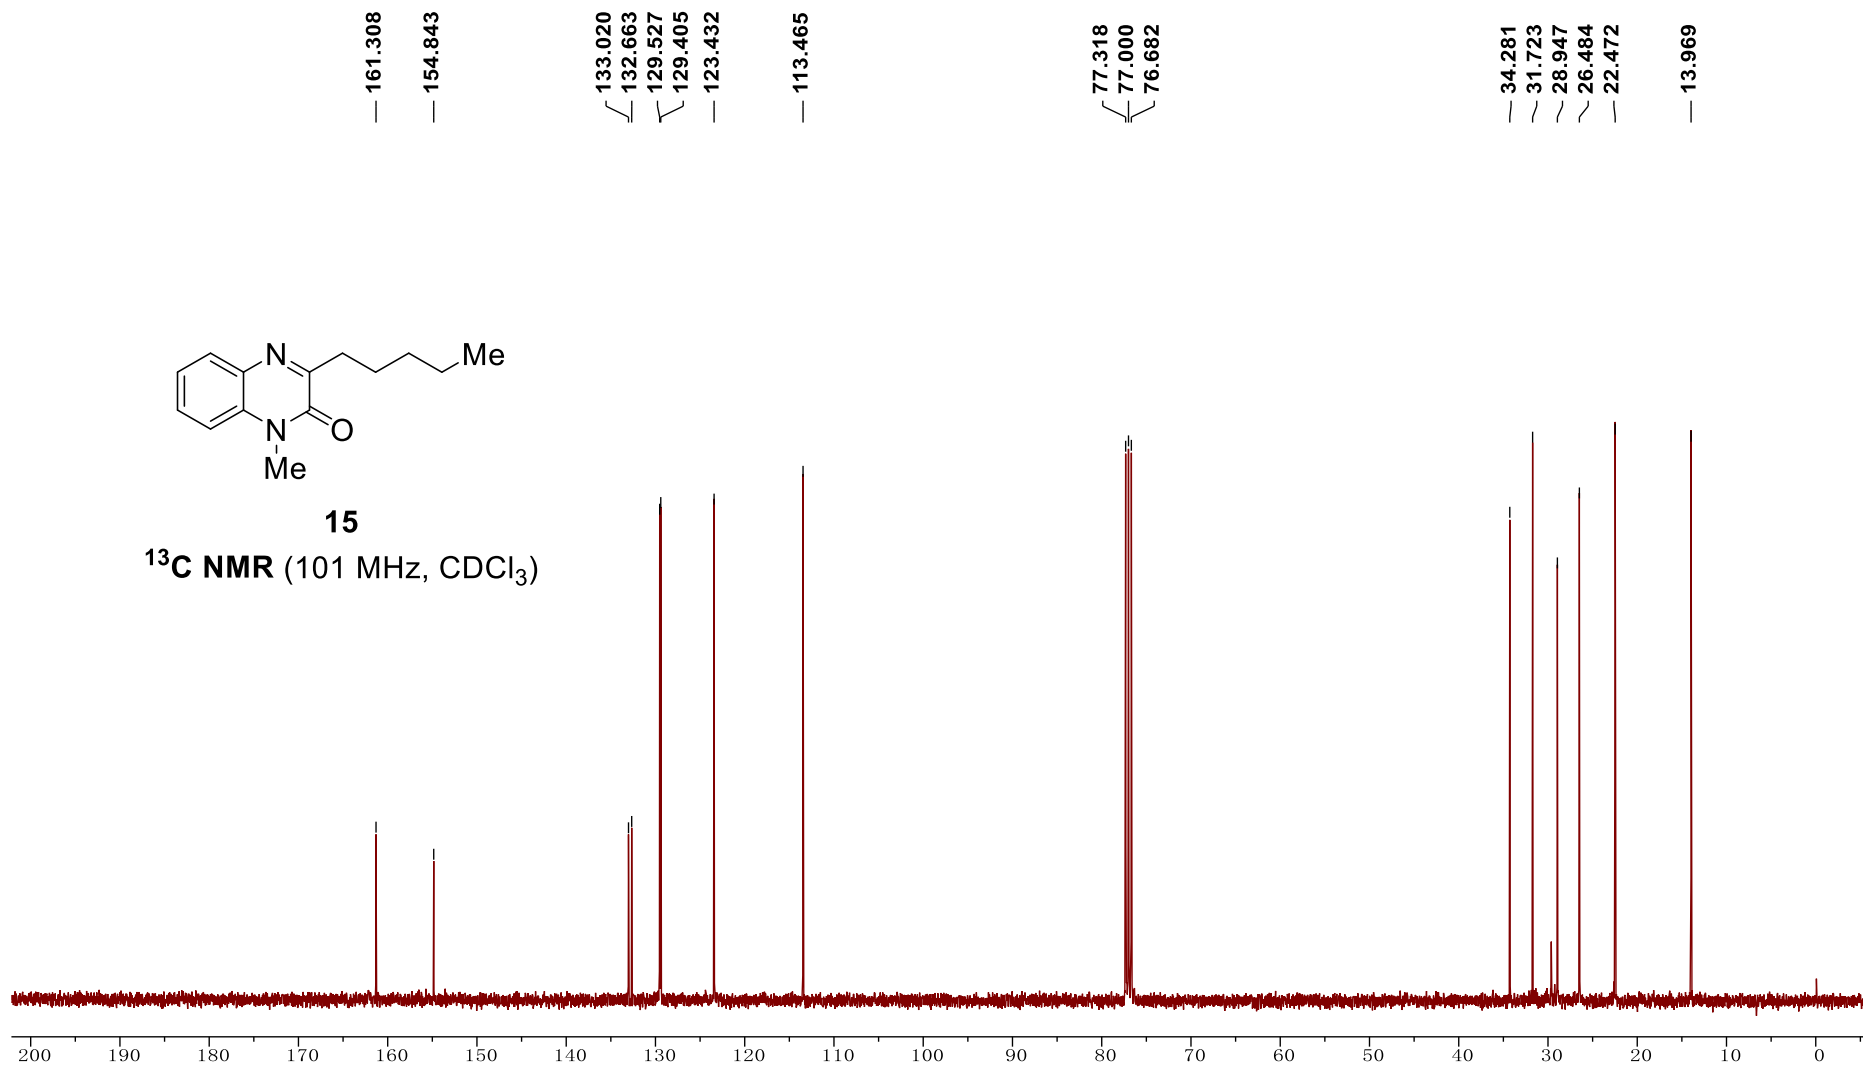

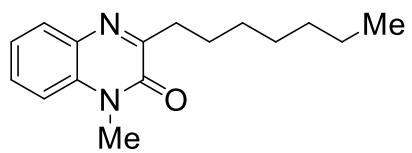

**16**

**<sup>1</sup>H NMR (400 MHz, CDCl<sub>3</sub>)**

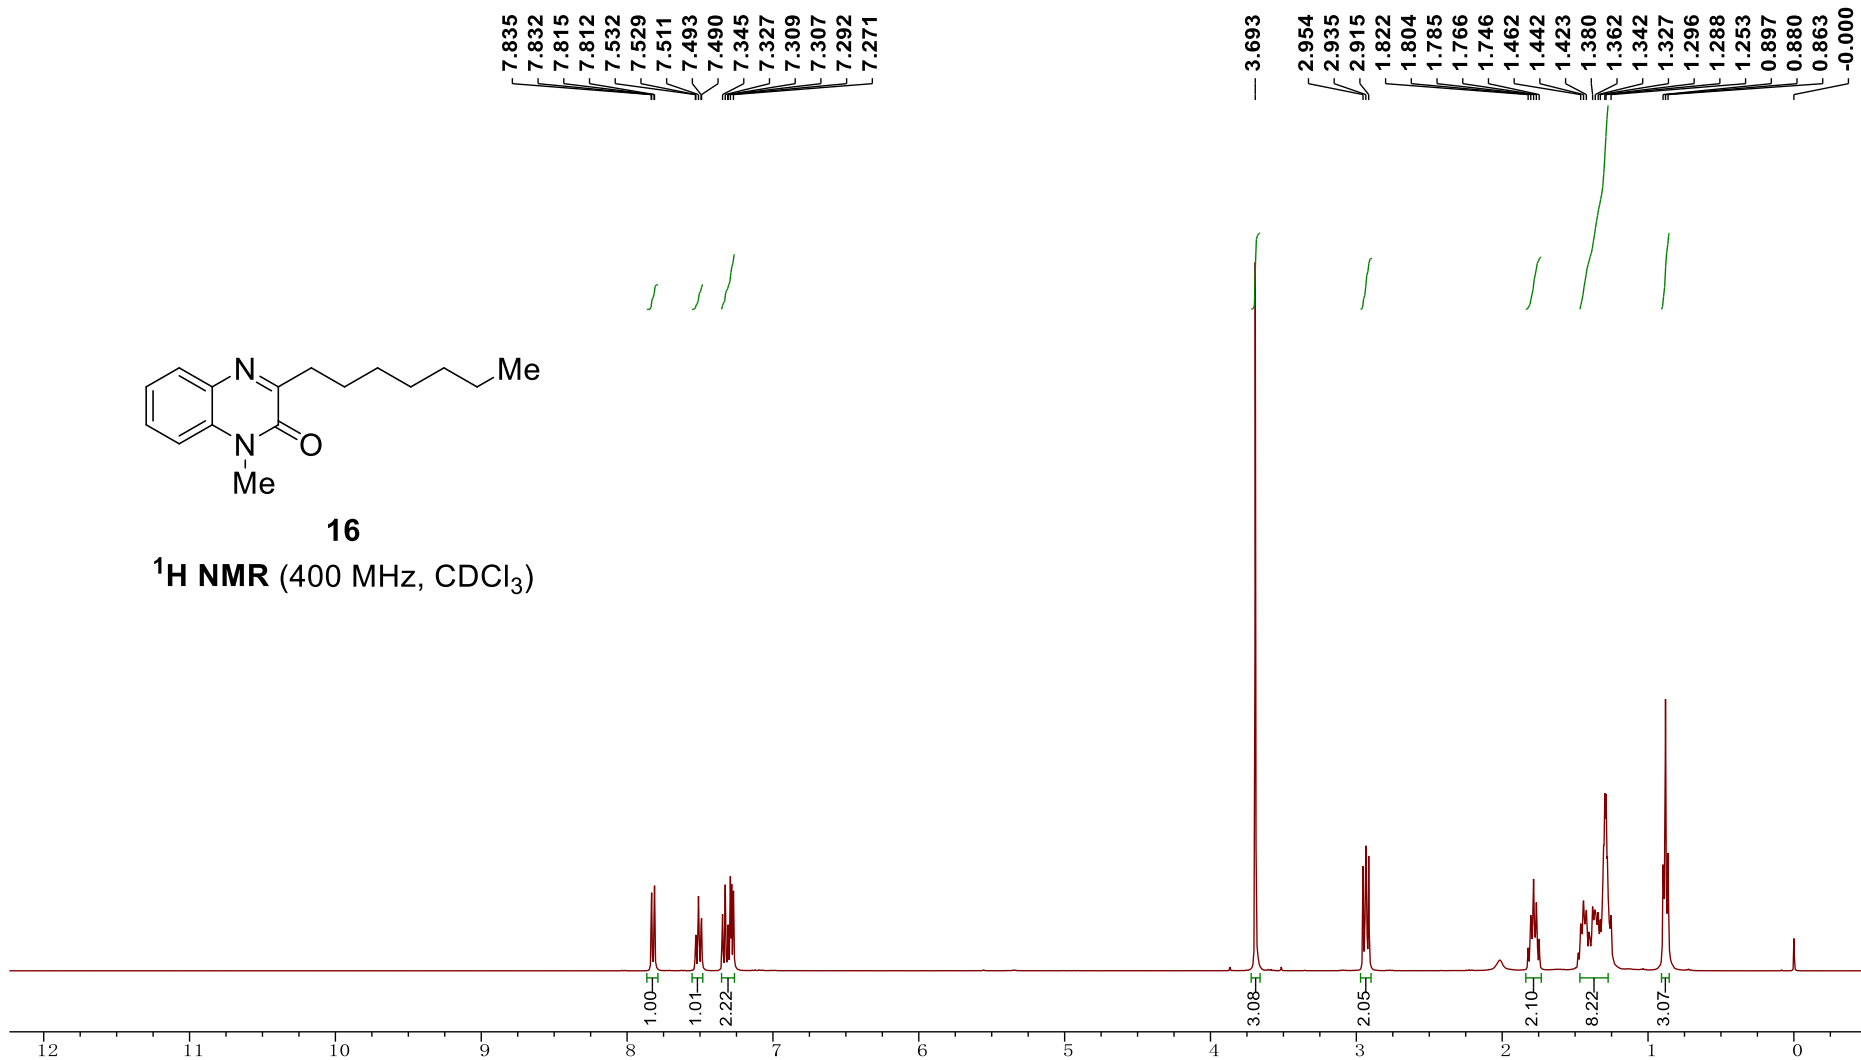

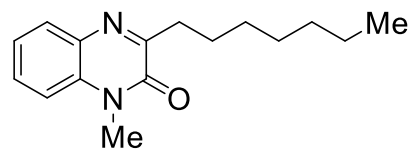

**16**

**<sup>13</sup>C NMR (101 MHz, CDCl<sub>3</sub>)**

— 161.287

— 154.816

— 133.000

— 132.647

— 129.508

— 129.378

— 123.408

— 113.441

— 77.318

— 77.000

— 76.682

— 34.315

— 31.700

— 29.497

— 29.078

— 28.924

— 26.782

— 22.571

— 14.022

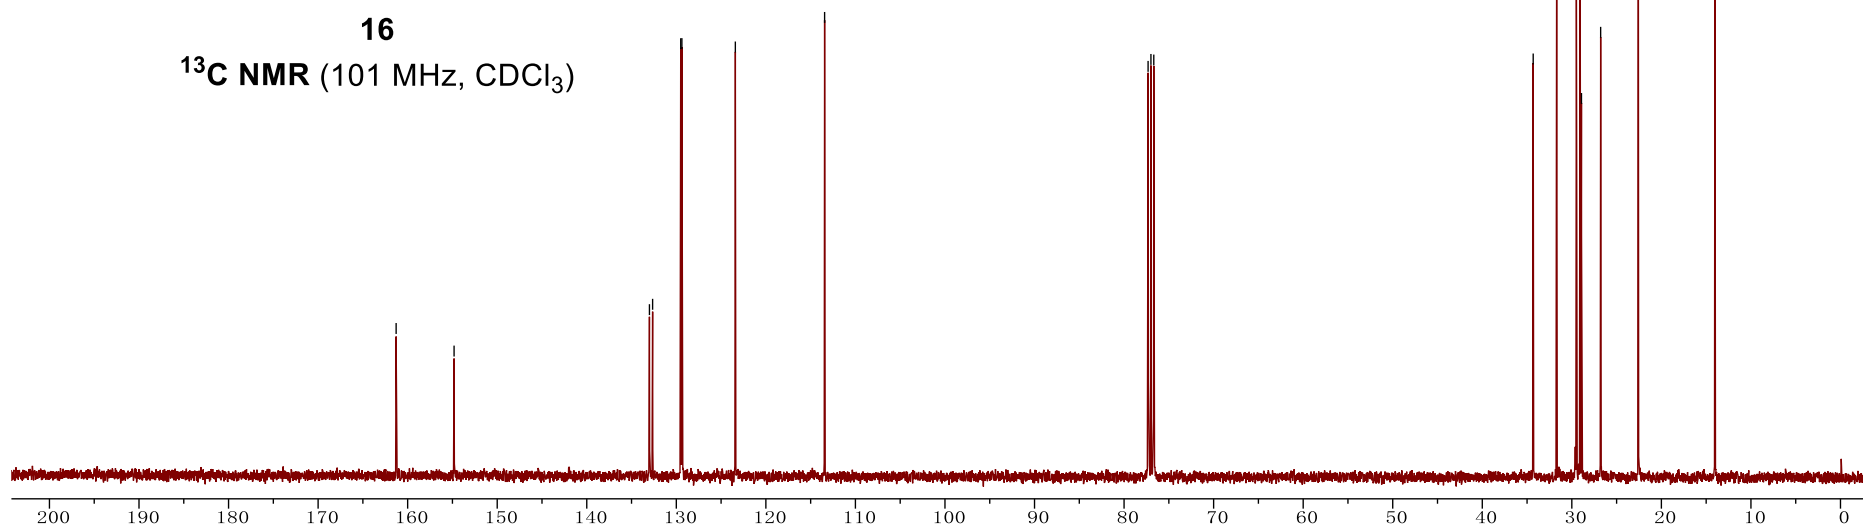

CN1C(=O)C(C)CC=N1c2ccccc2  
**17**  
 $^1\text{H NMR}$  (400 MHz,  $\text{CDCl}_3$ )

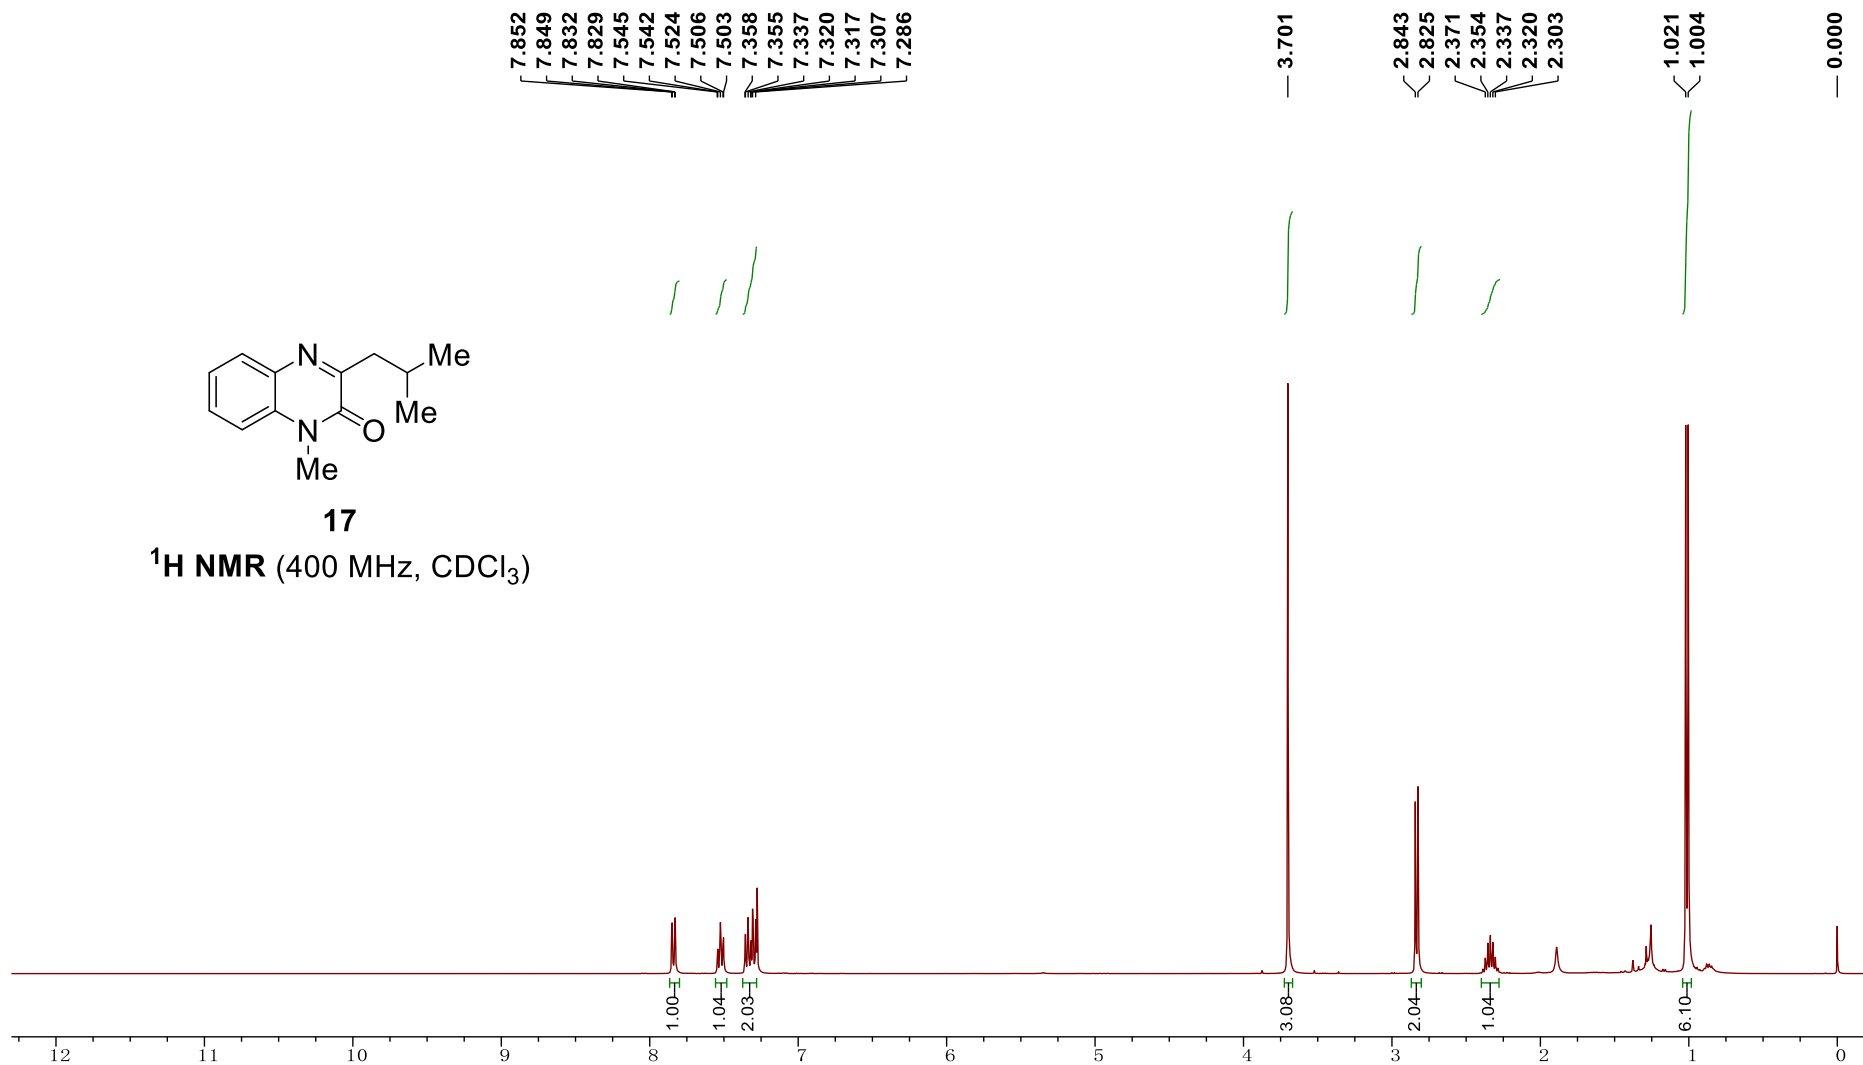

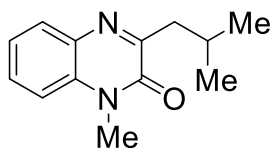

17

<sup>13</sup>C NMR (101 MHz, CDCl<sub>3</sub>)

— 160.655

— 155.032

— 133.029

— 132.644

— 129.627

— 129.484

— 123.452

— 113.491

— 77.317

— 77.000

— 76.682

— 42.892

— 29.012

— 26.813

— 22.670

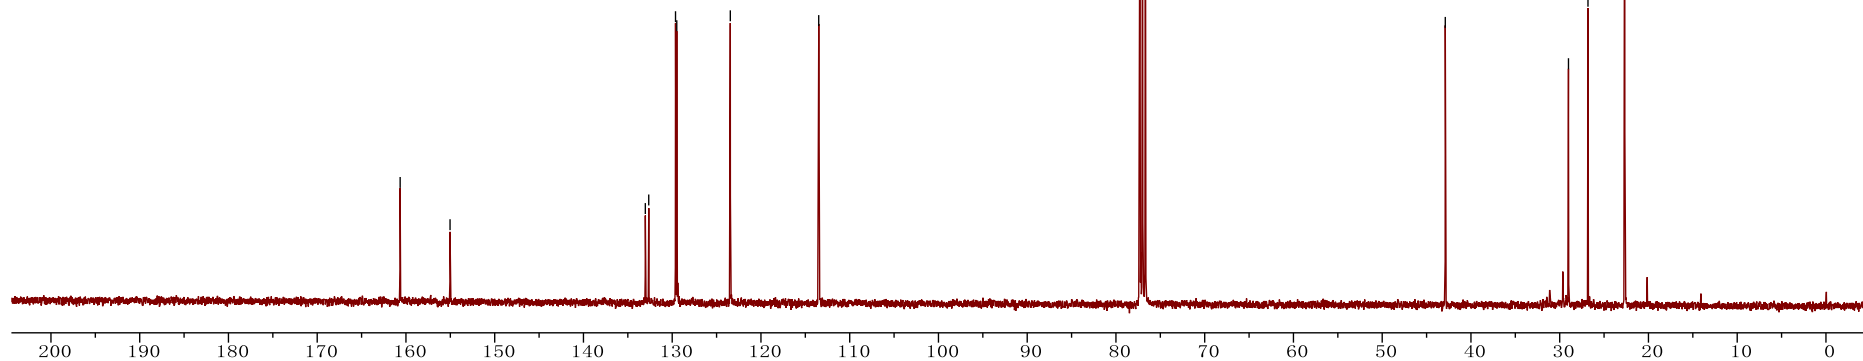

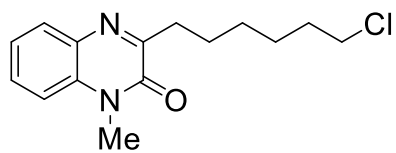

**18**

<sup>1</sup>H NMR (400 MHz, CDCl<sub>3</sub>)

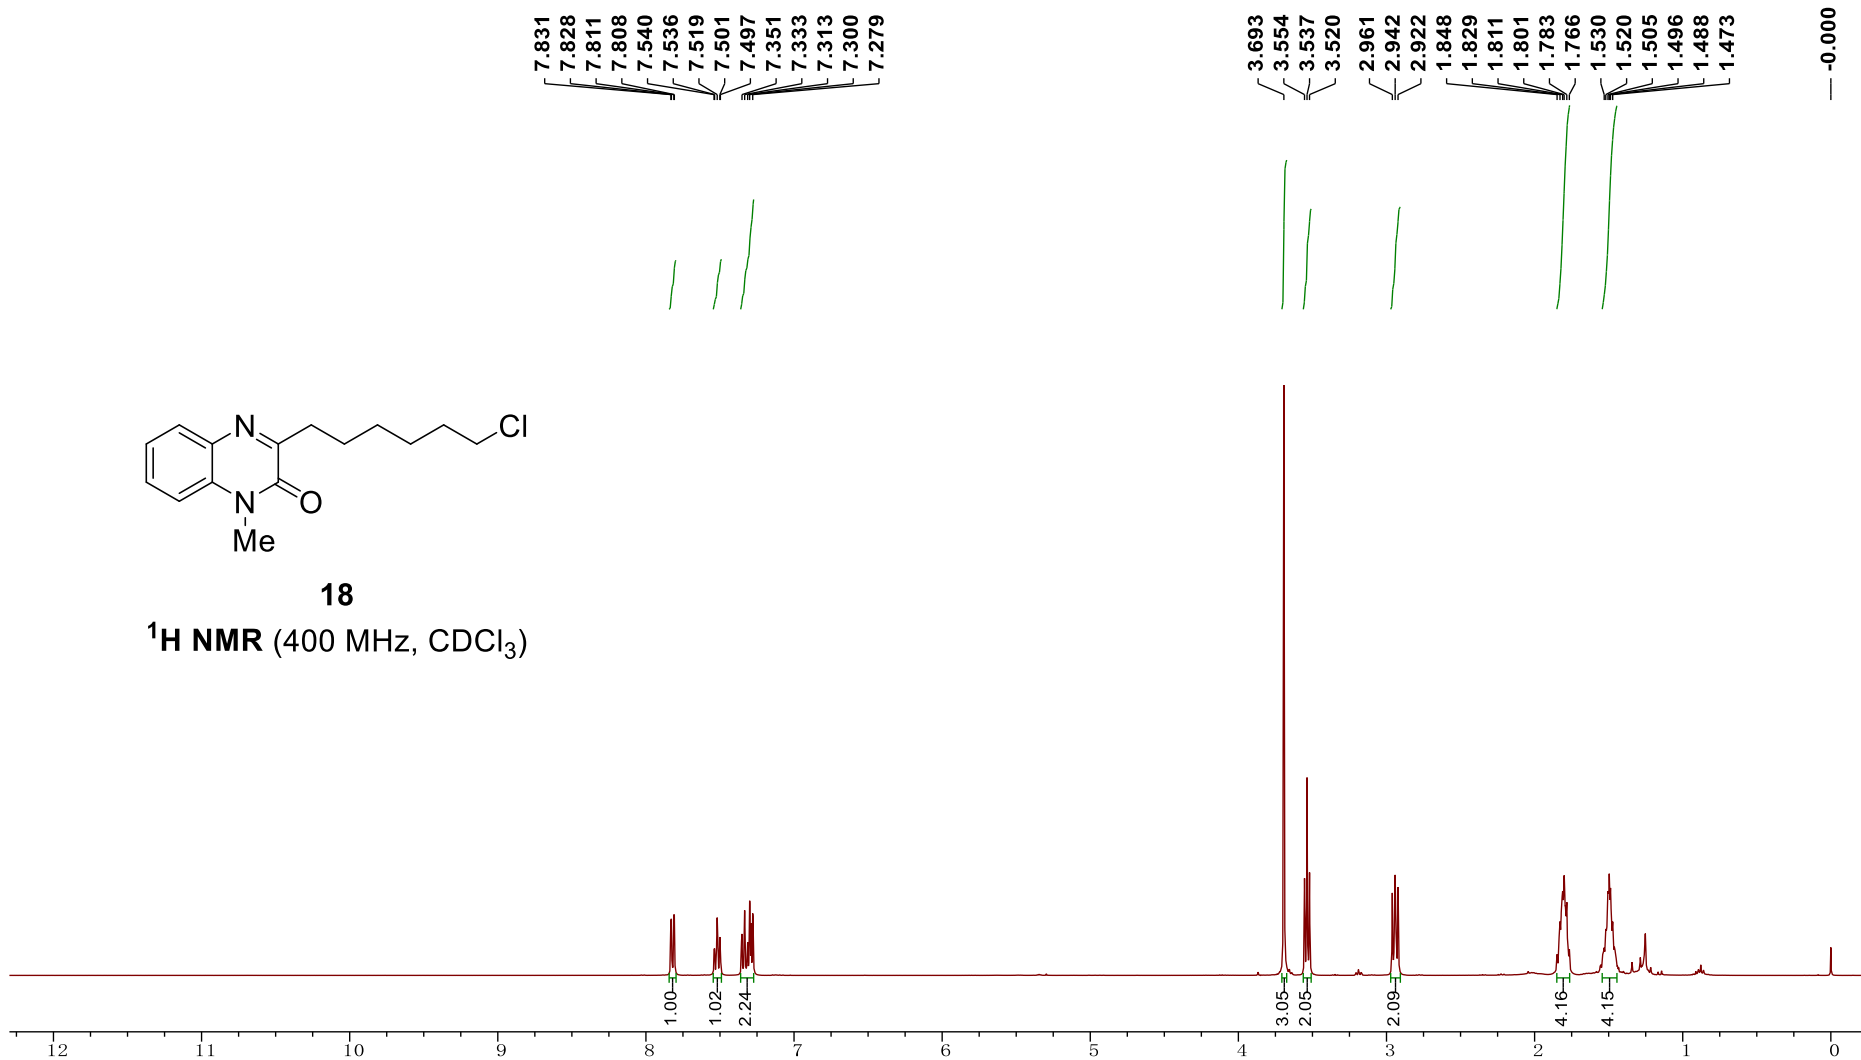



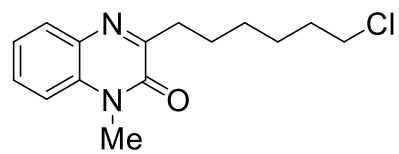

**18**

**$^{13}\text{C}$  NMR (75 MHz,  $\text{CDCl}_3$ )**

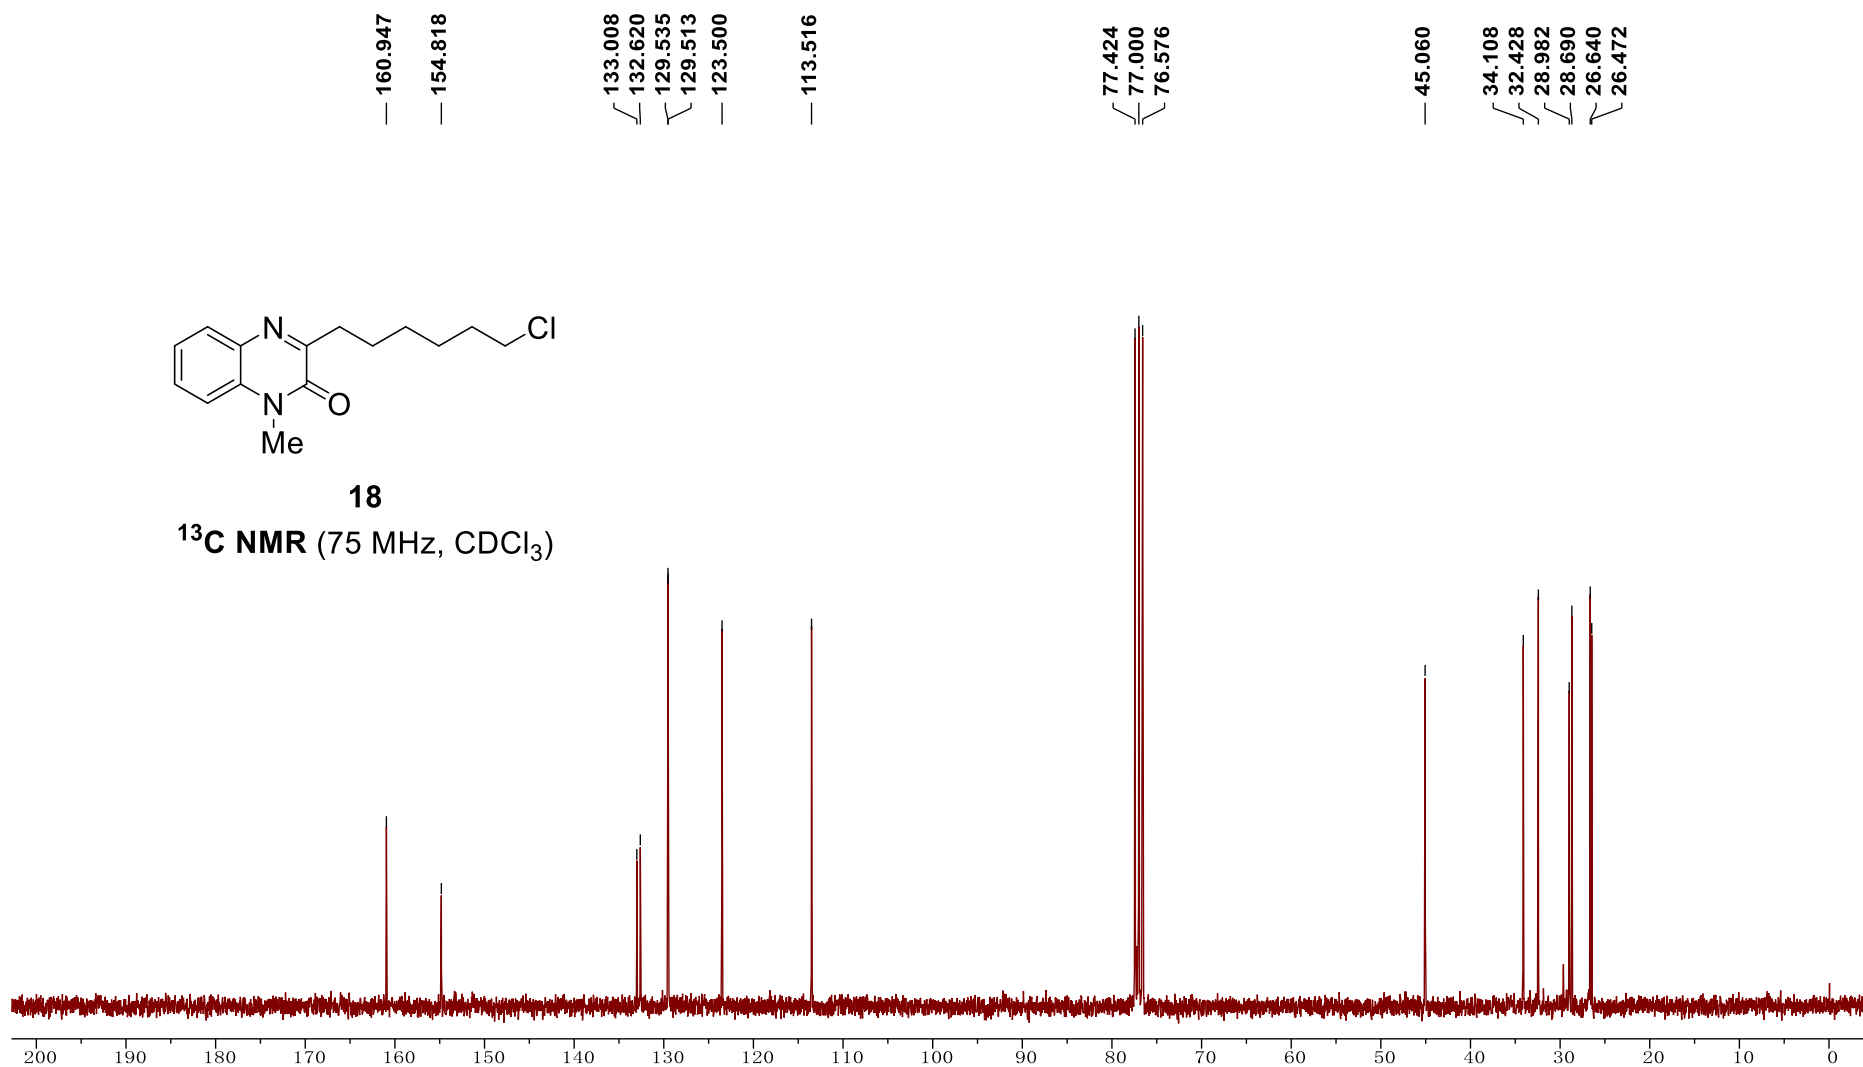

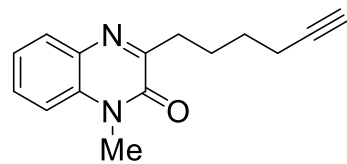

**19**

**<sup>1</sup>H NMR (300 MHz, CDCl<sub>3</sub>)**

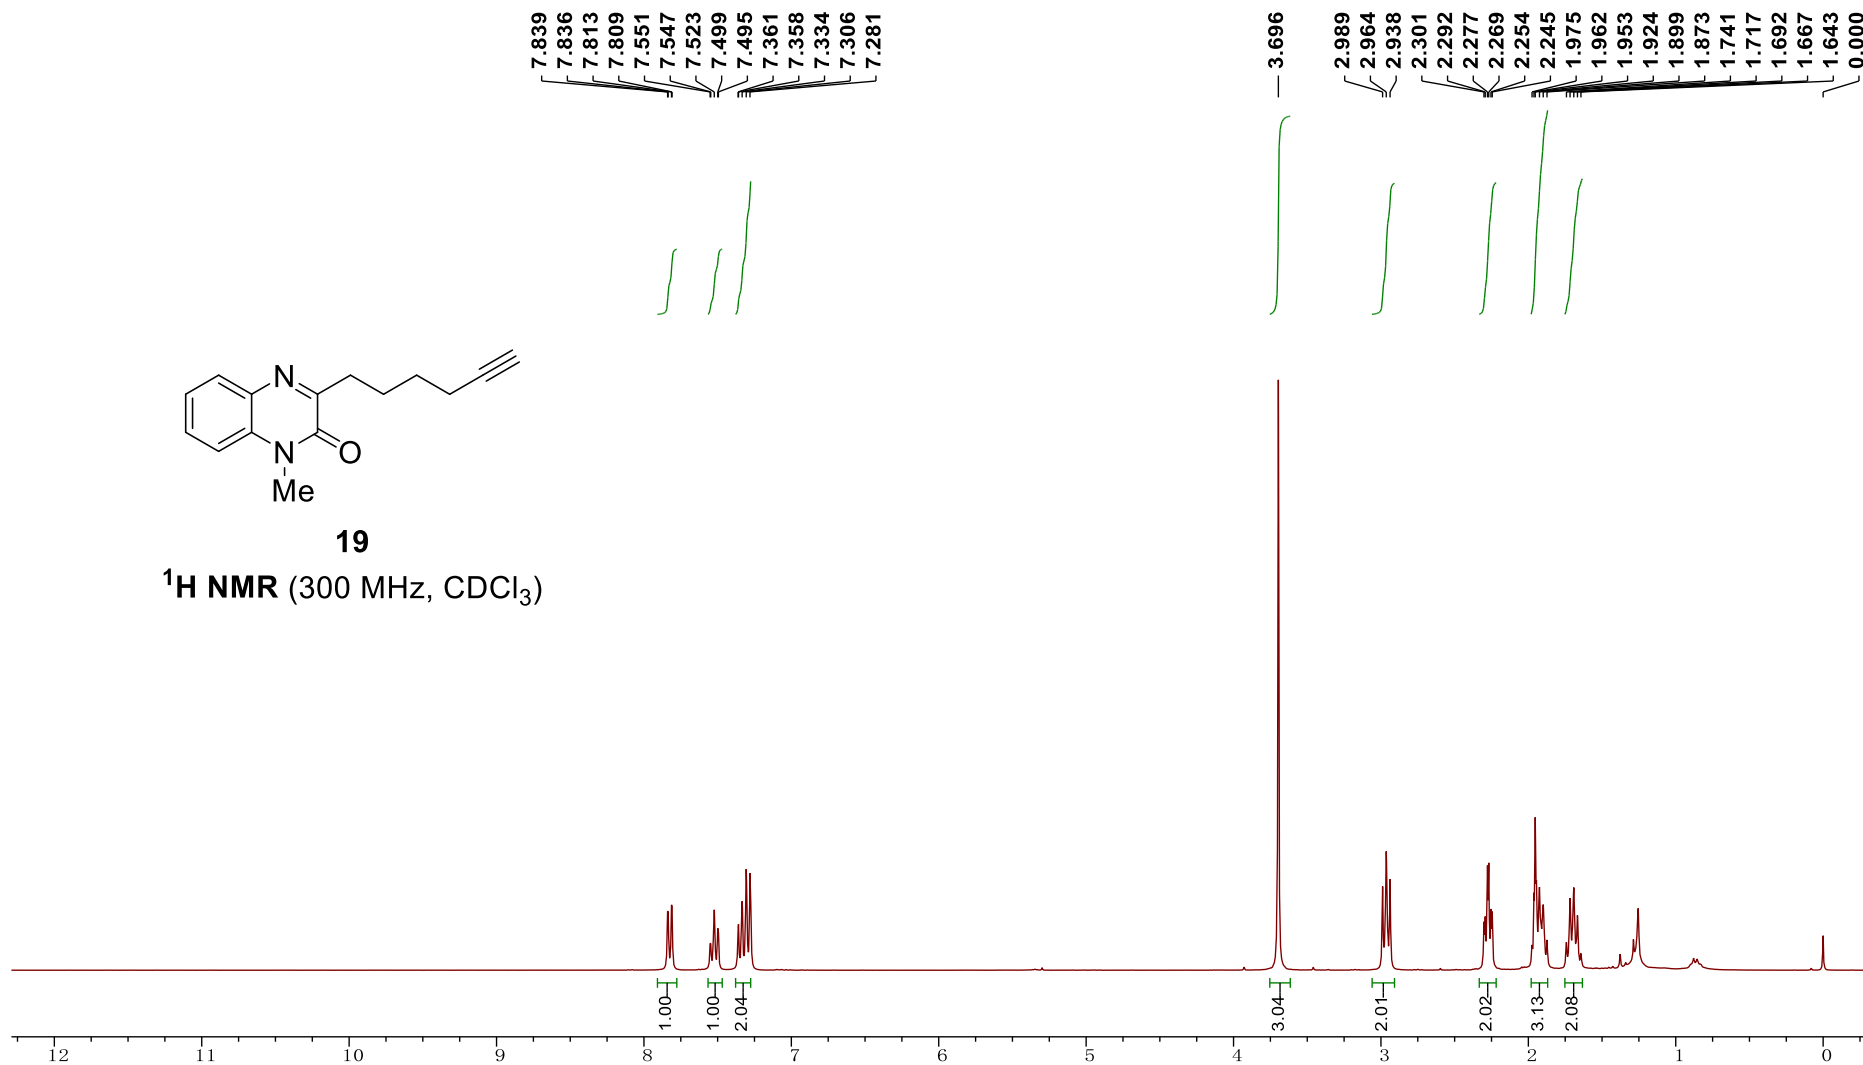

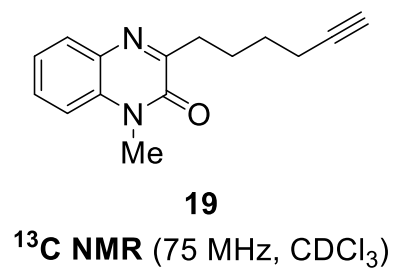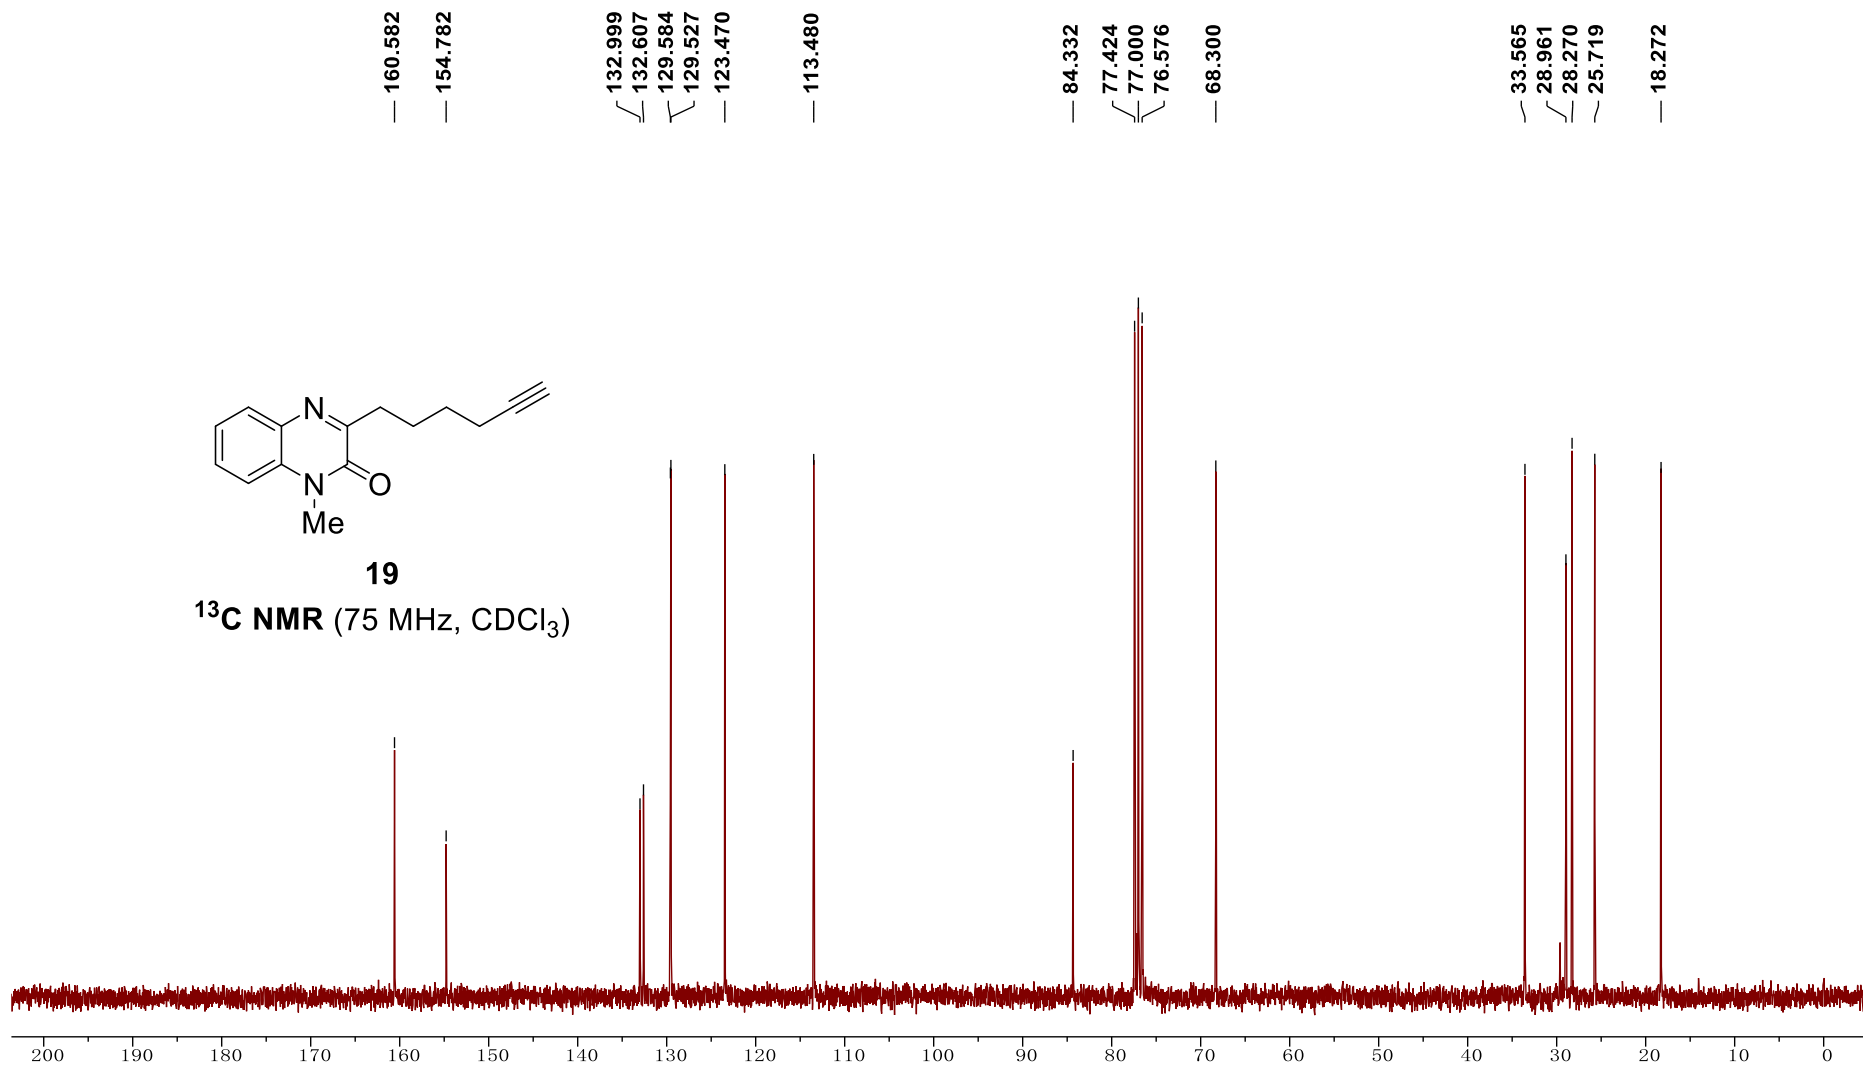

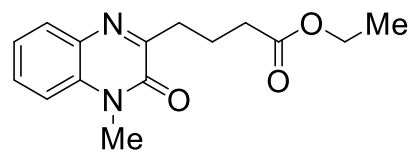

**20**

**<sup>1</sup>H NMR (400 MHz, CDCl<sub>3</sub>)**

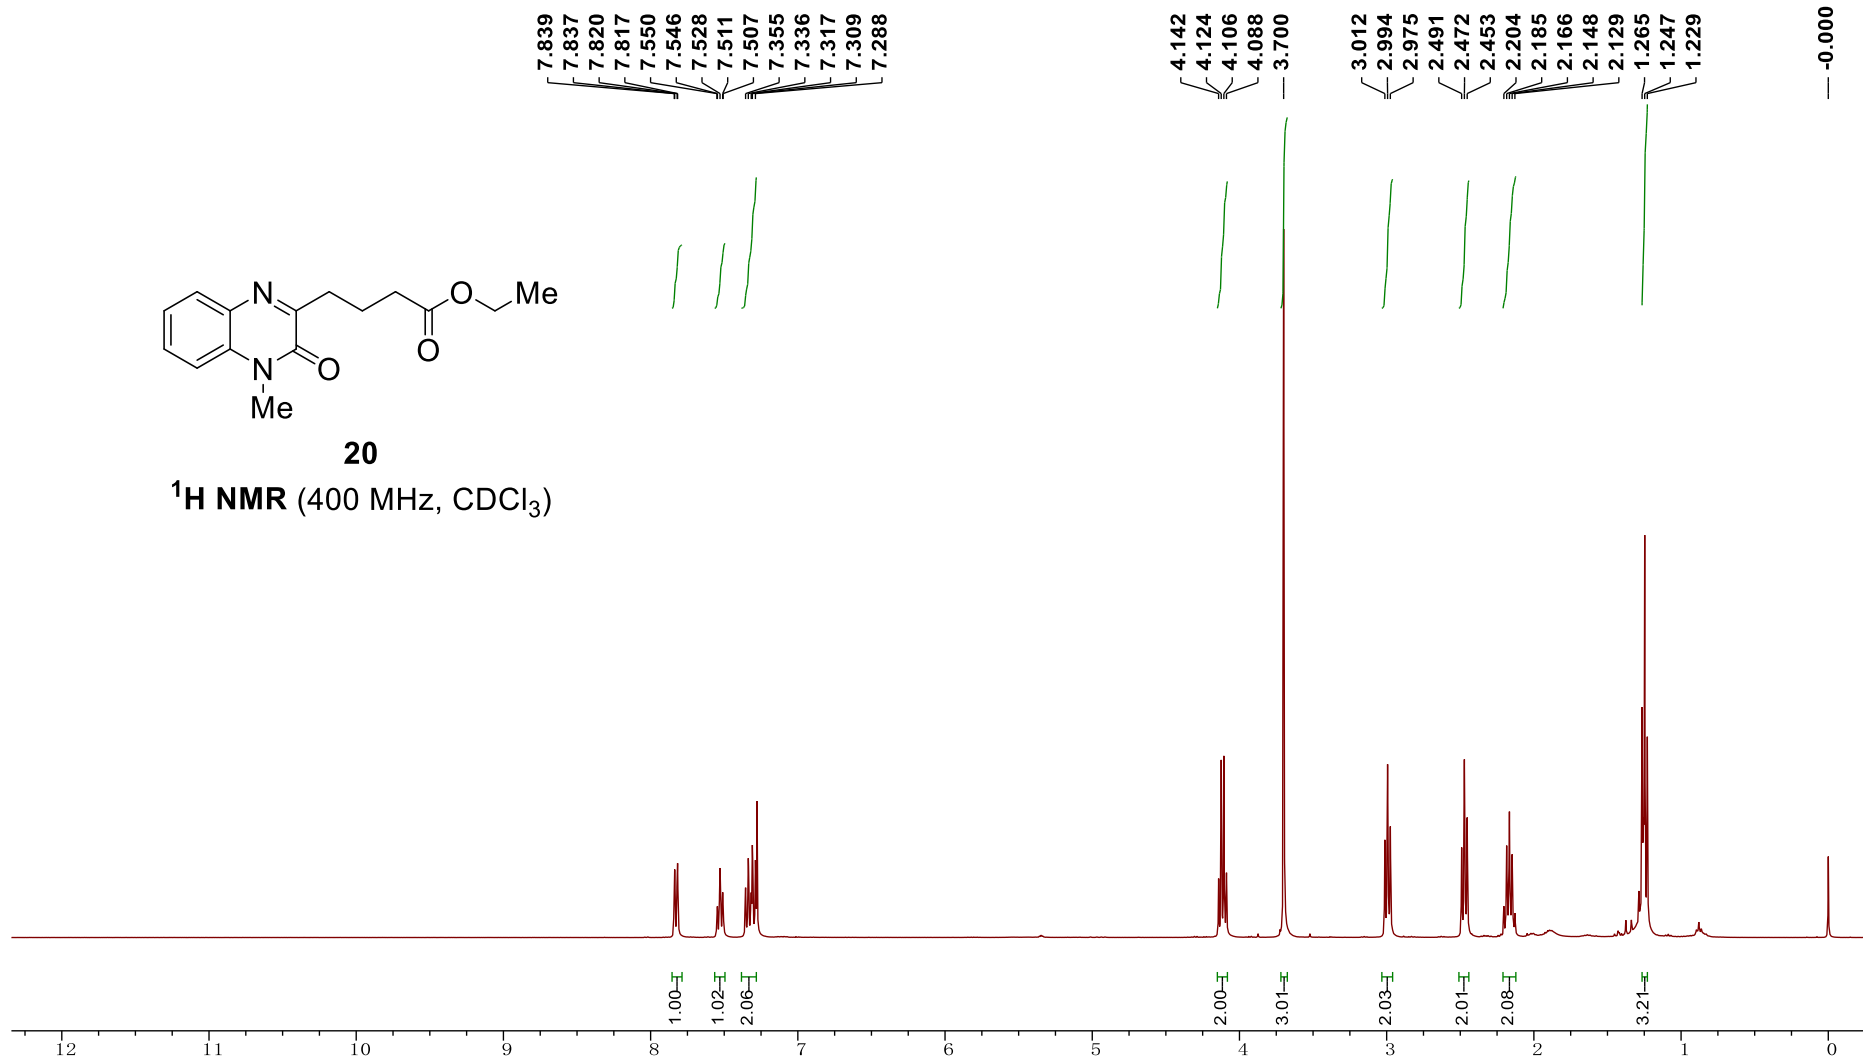

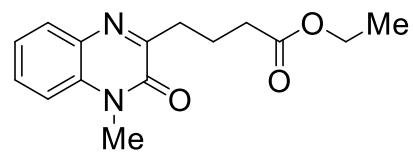

**20**

**<sup>13</sup>C NMR (101 MHz, CDCl<sub>3</sub>)**

— 173.390

— 159.959

— 154.815

— 133.042

— 132.619

— 129.717

— 129.666

— 123.541

— 113.540

— 77.318

— 77.000

— 76.682

— 60.271

— 33.834

— 33.196

— 29.018

— 21.603

— 14.211

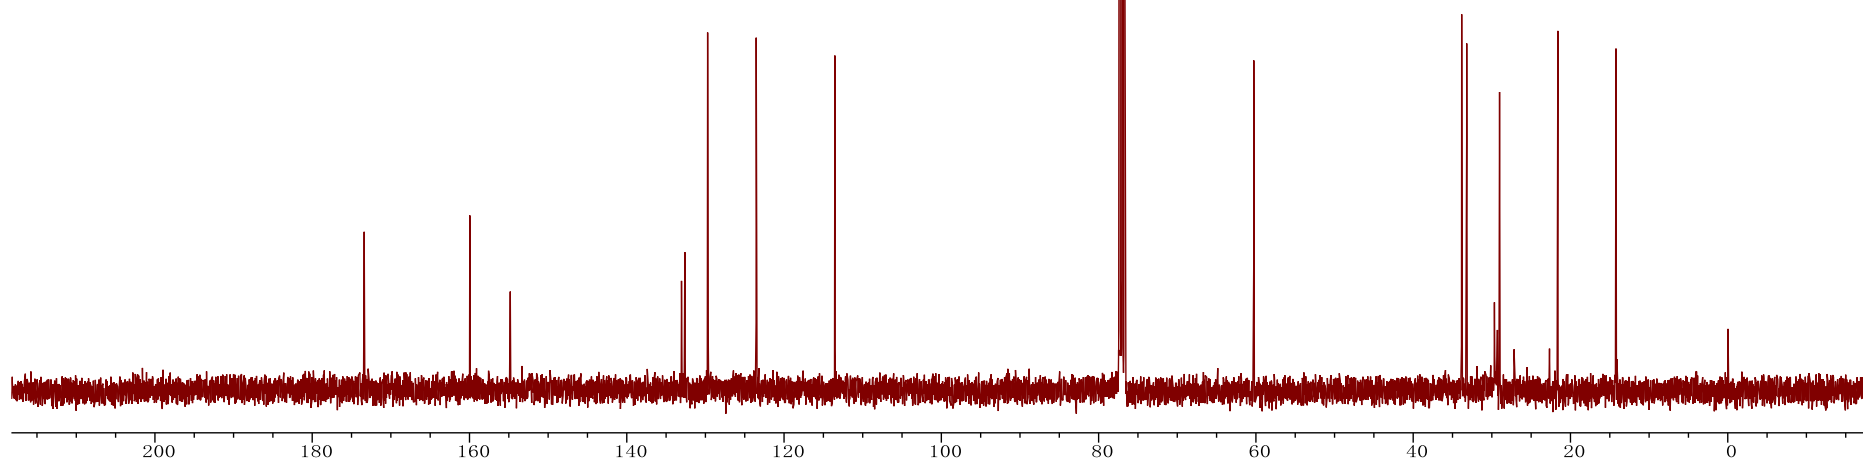

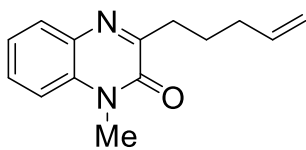

21

<sup>1</sup>H NMR (500 MHz, CDCl<sub>3</sub>)

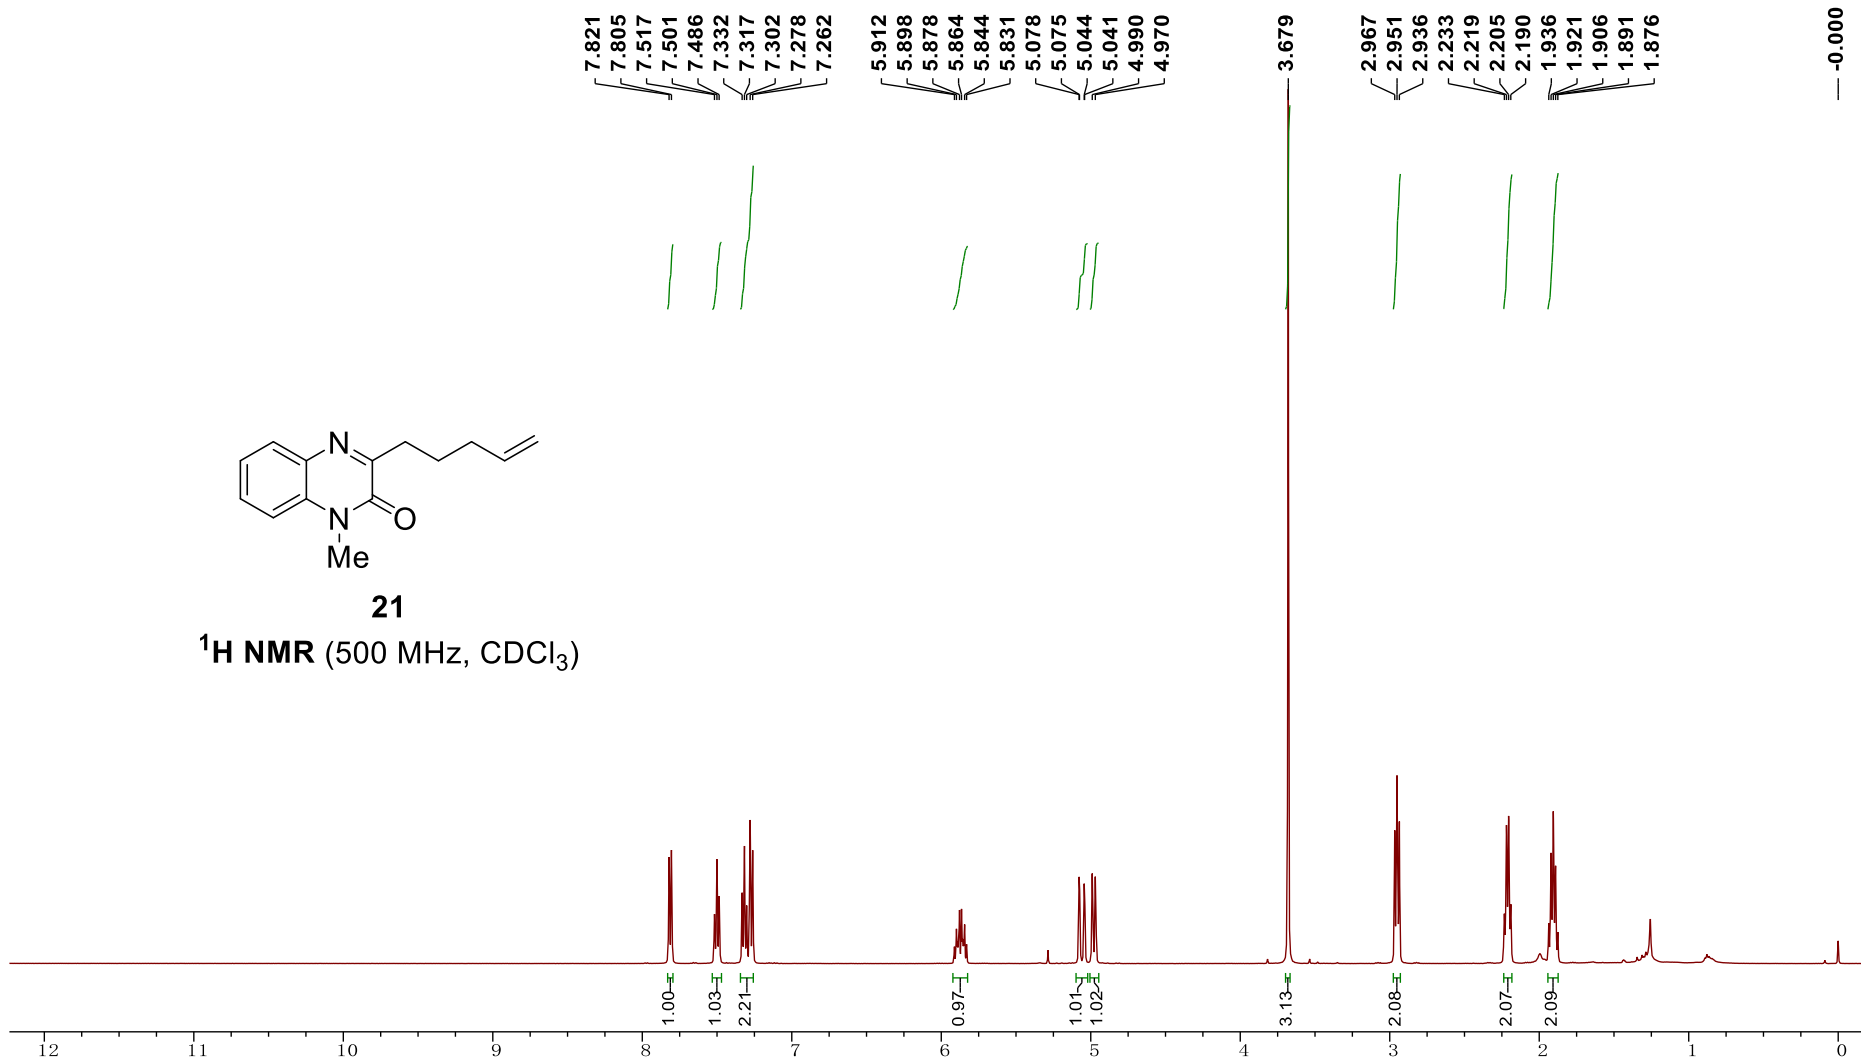

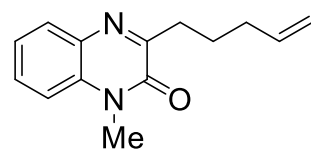

**21**

**<sup>13</sup>C NMR (101 MHz, CDCl<sub>3</sub>)**

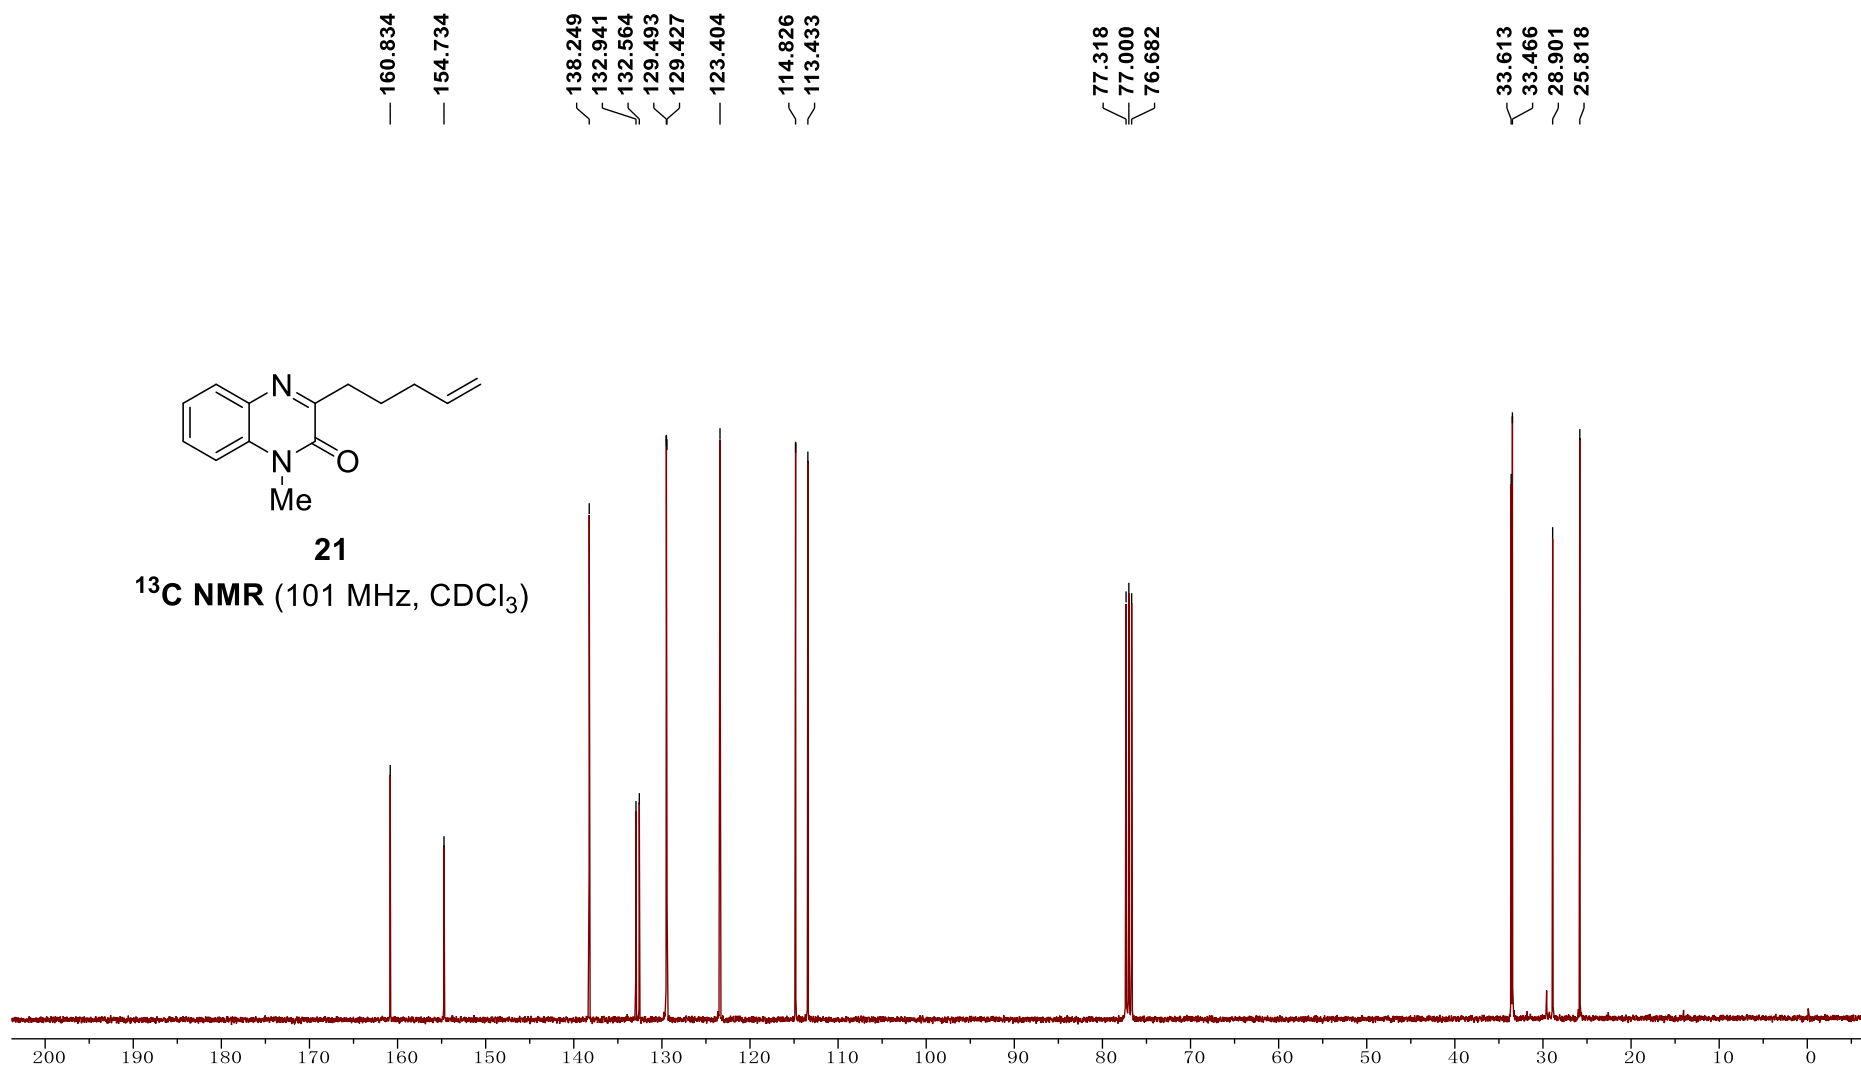

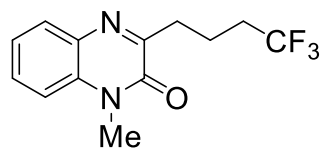

**22**

**<sup>1</sup>H NMR (400 MHz, CDCl<sub>3</sub>)**

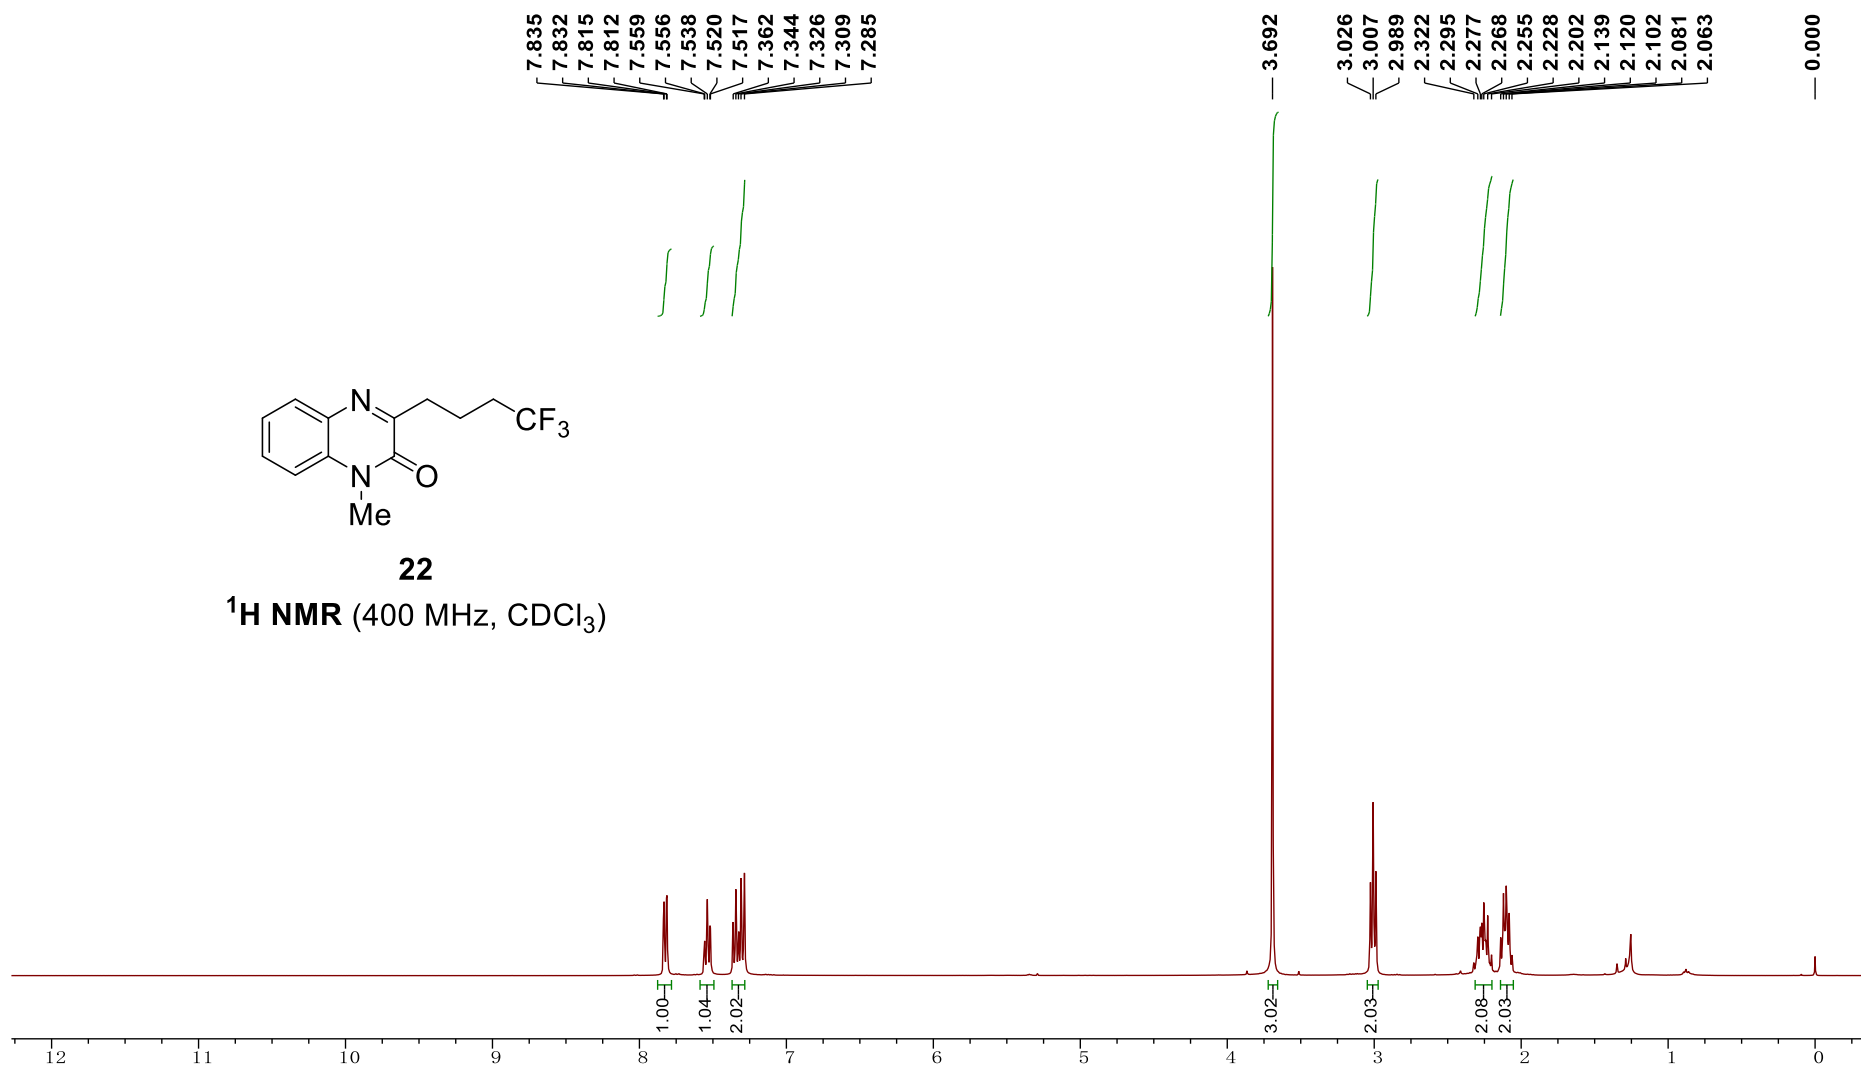



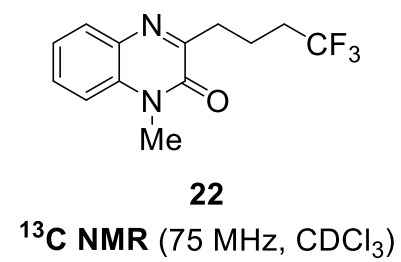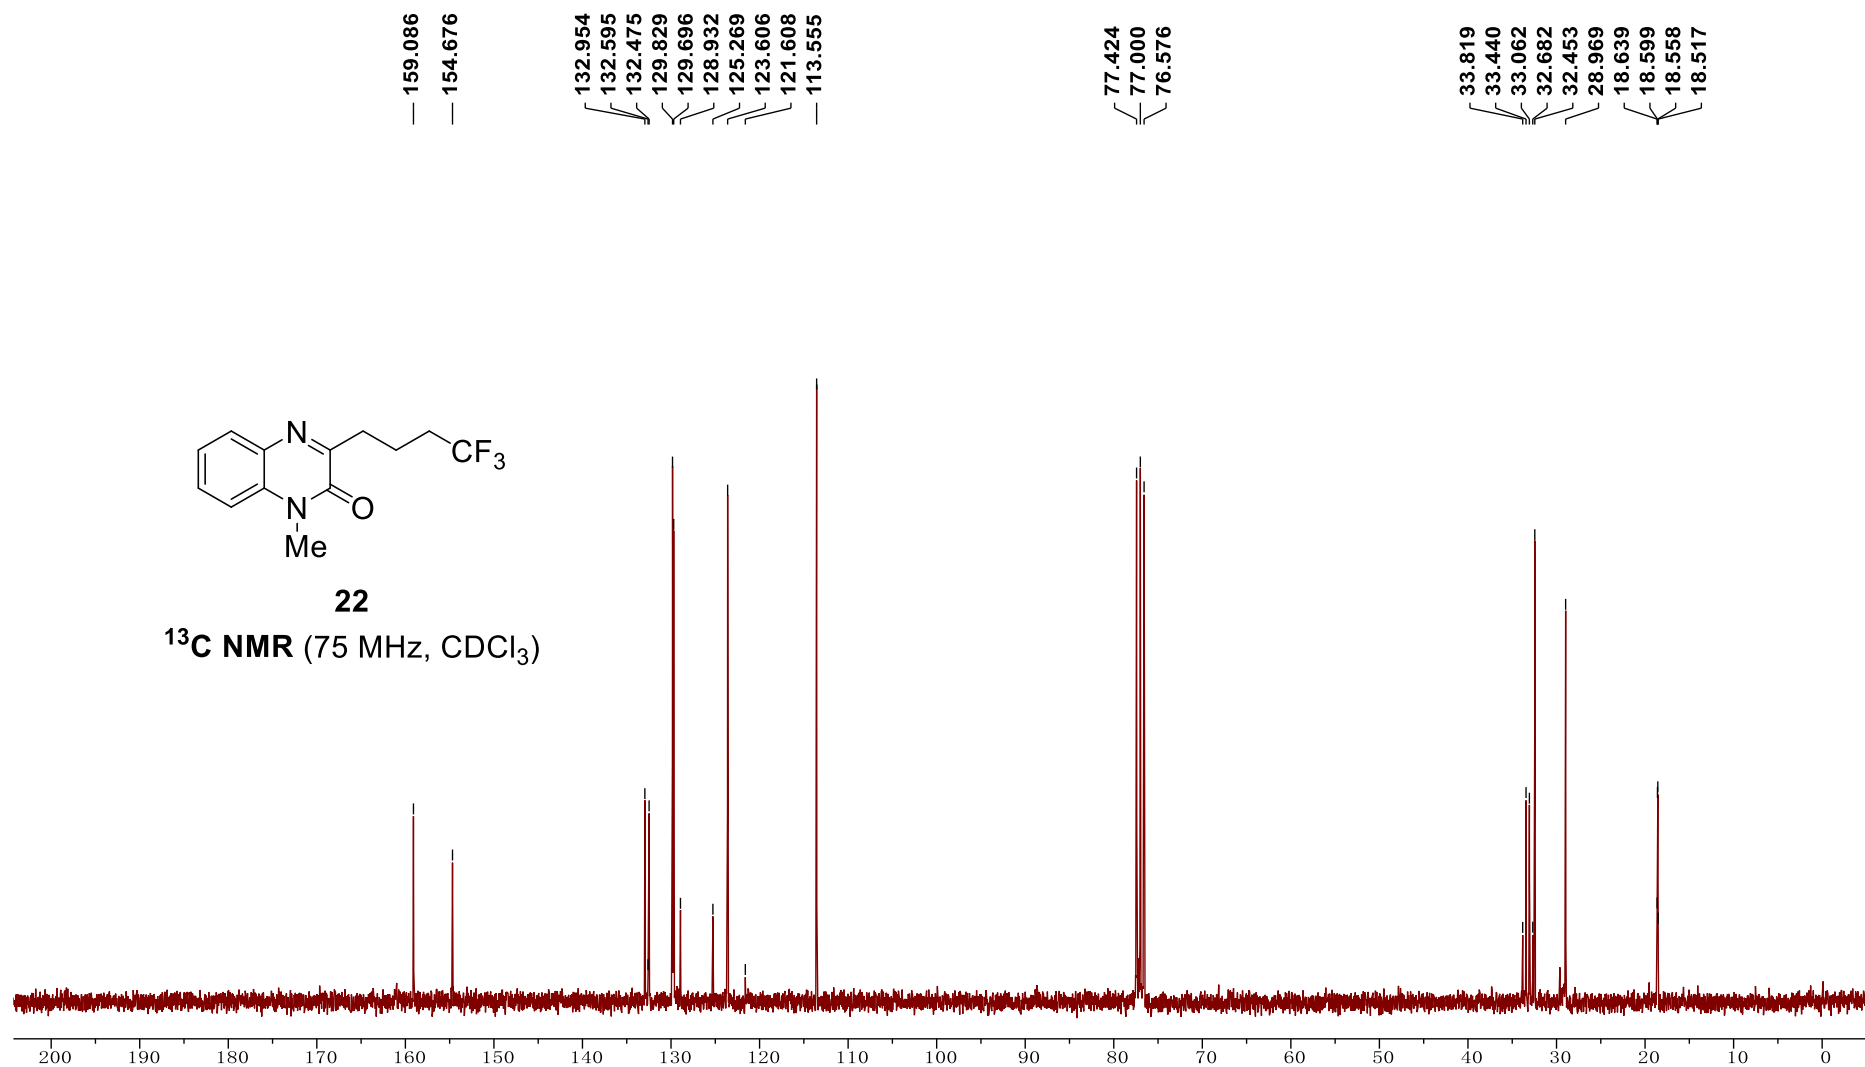

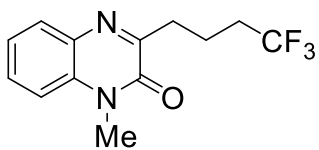

**22**

**<sup>19</sup>F NMR (282 MHz, CDCl<sub>3</sub>)**

— -66.306

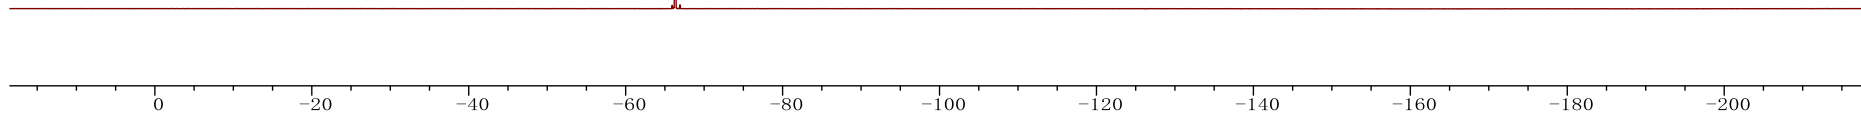

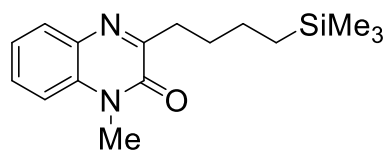

**23**

**<sup>1</sup>H NMR (300 MHz, CDCl<sub>3</sub>)**

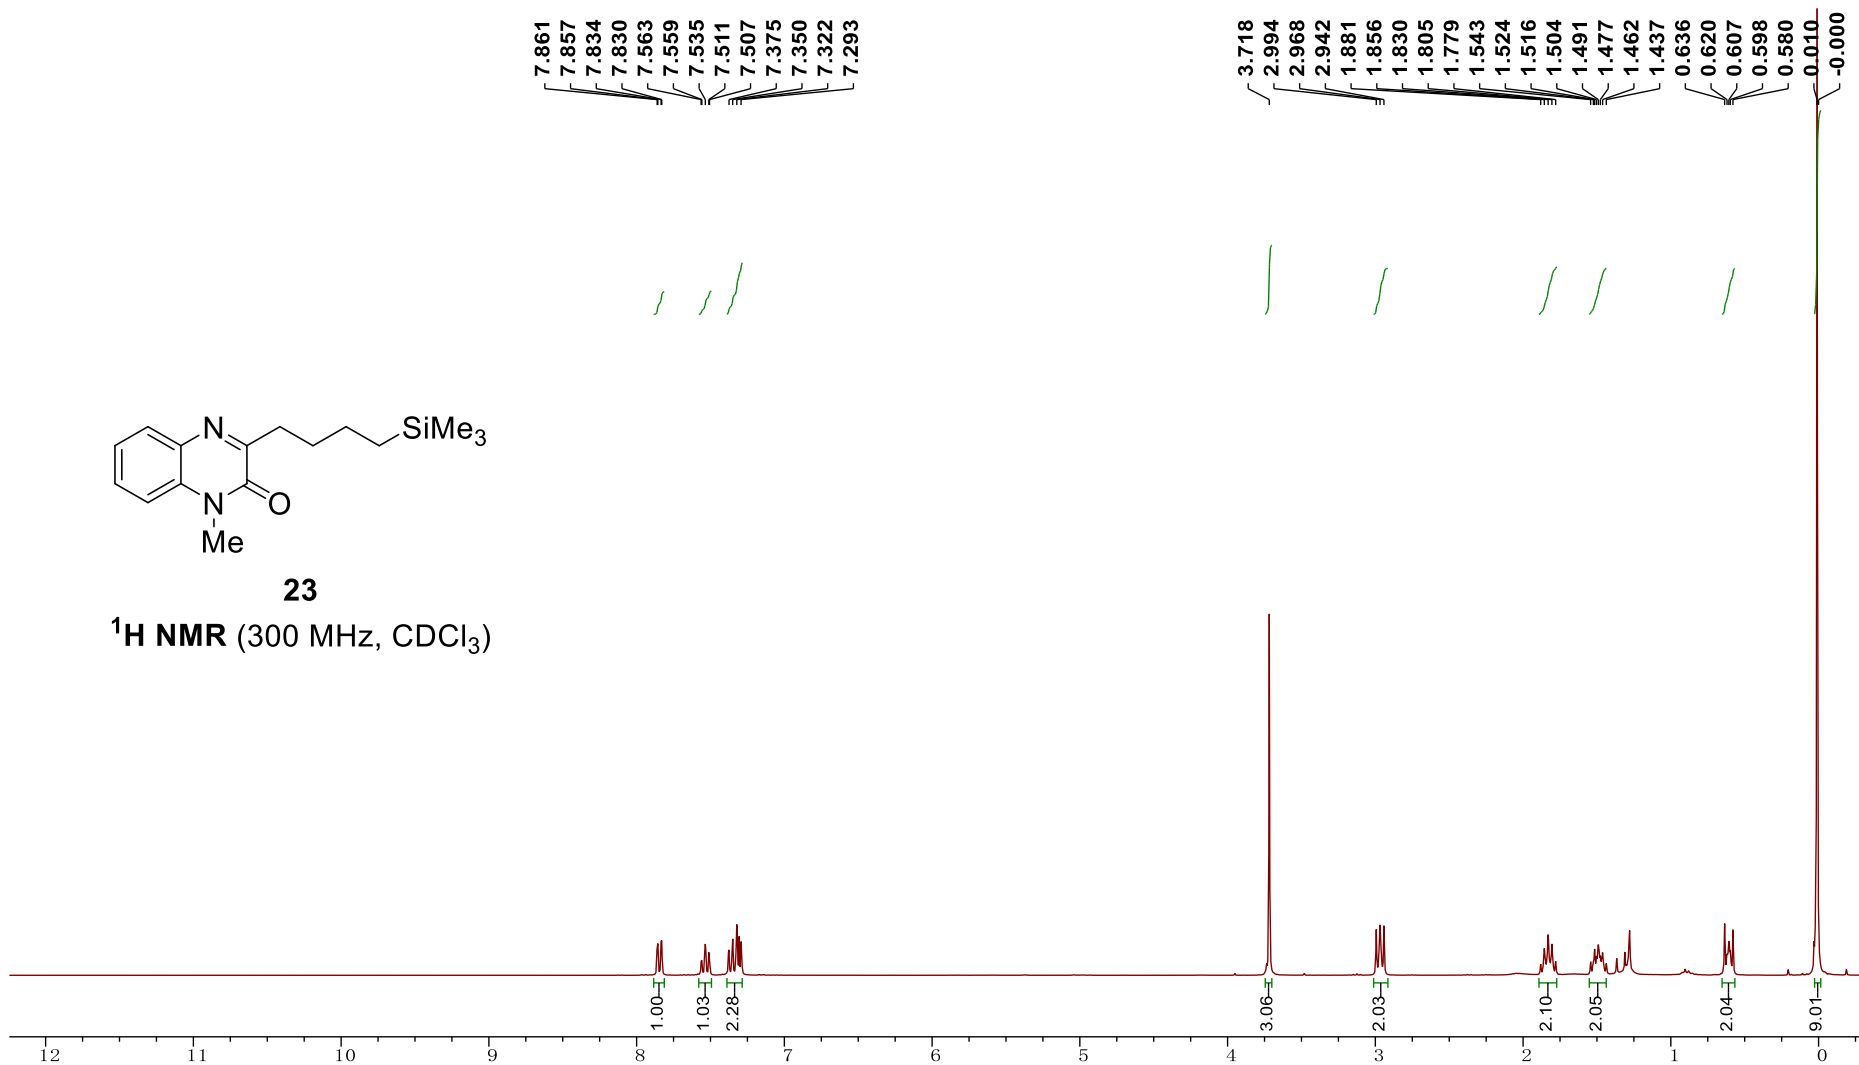

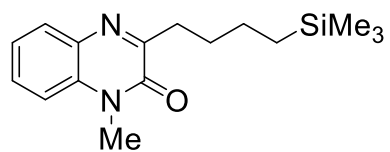

**23**

**<sup>13</sup>C NMR (101 MHz, CDCl<sub>3</sub>)**

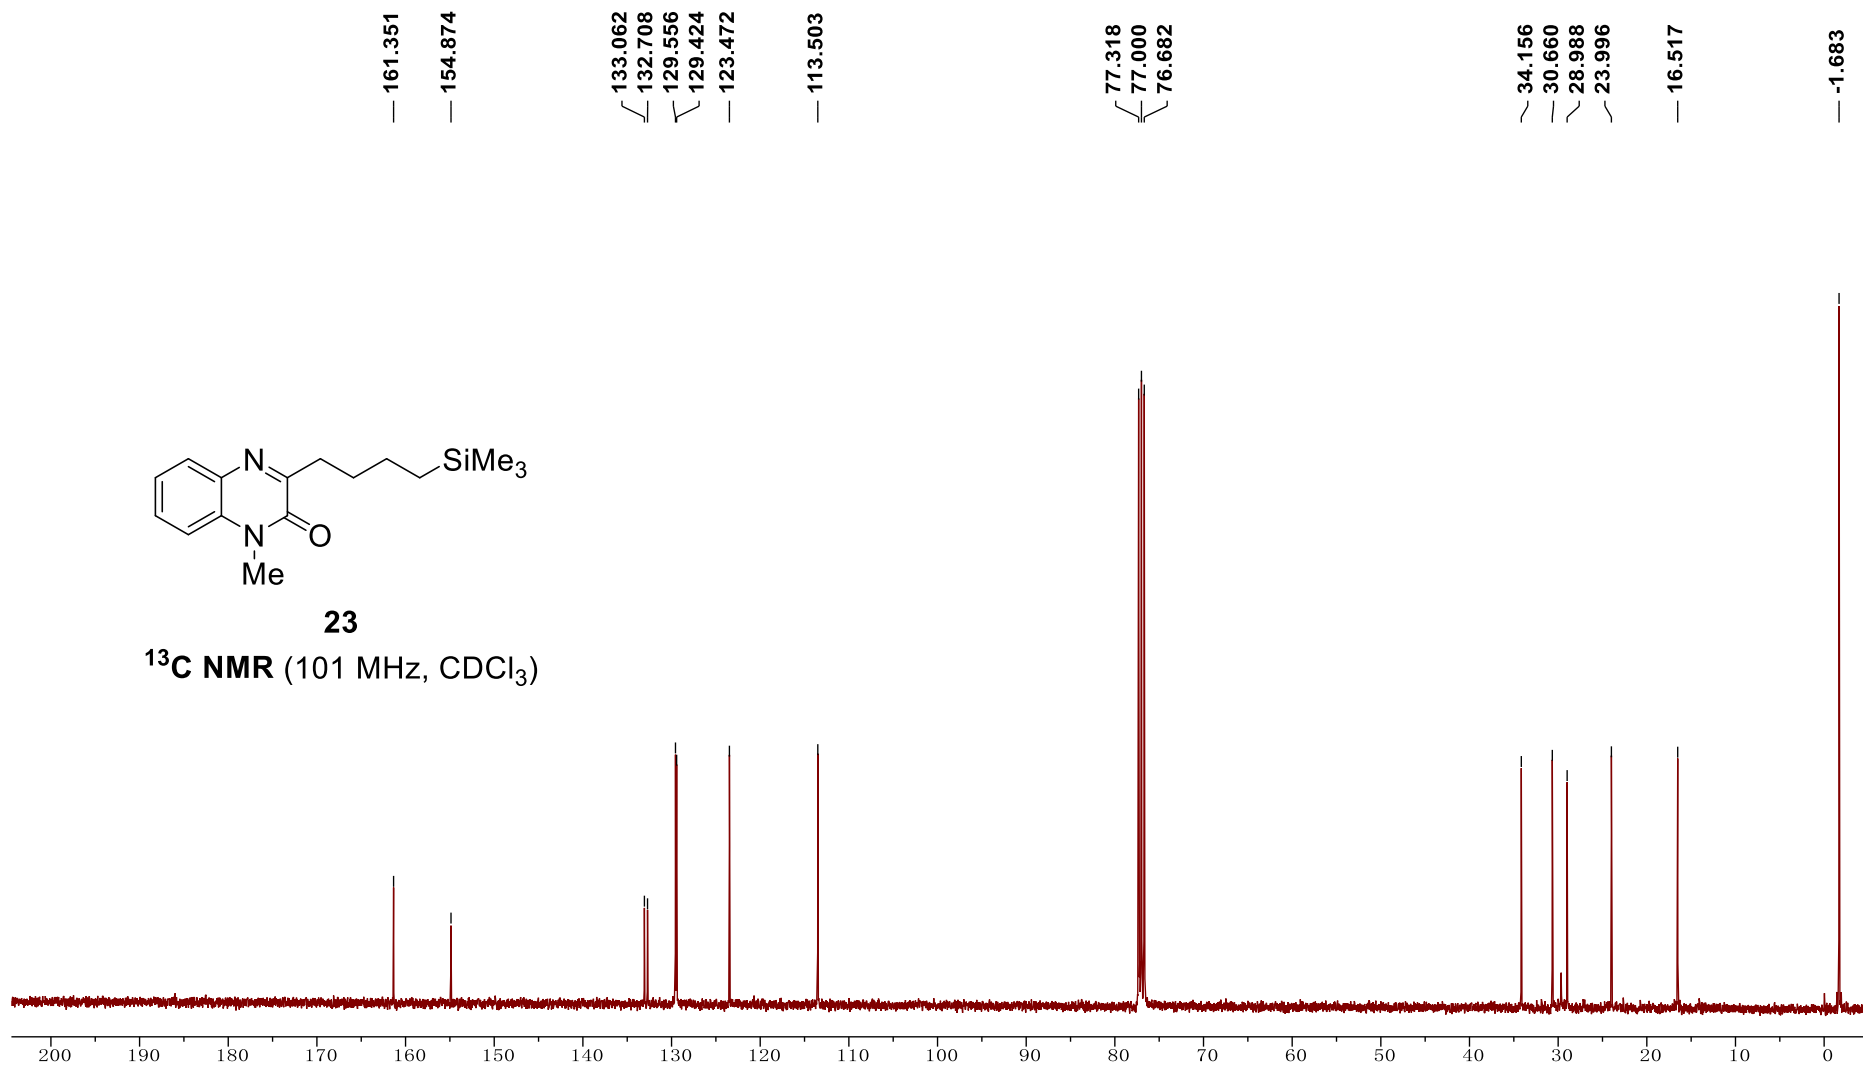

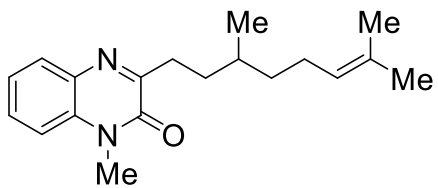

**24**

**<sup>1</sup>H NMR (300 MHz, CDCl<sub>3</sub>)**

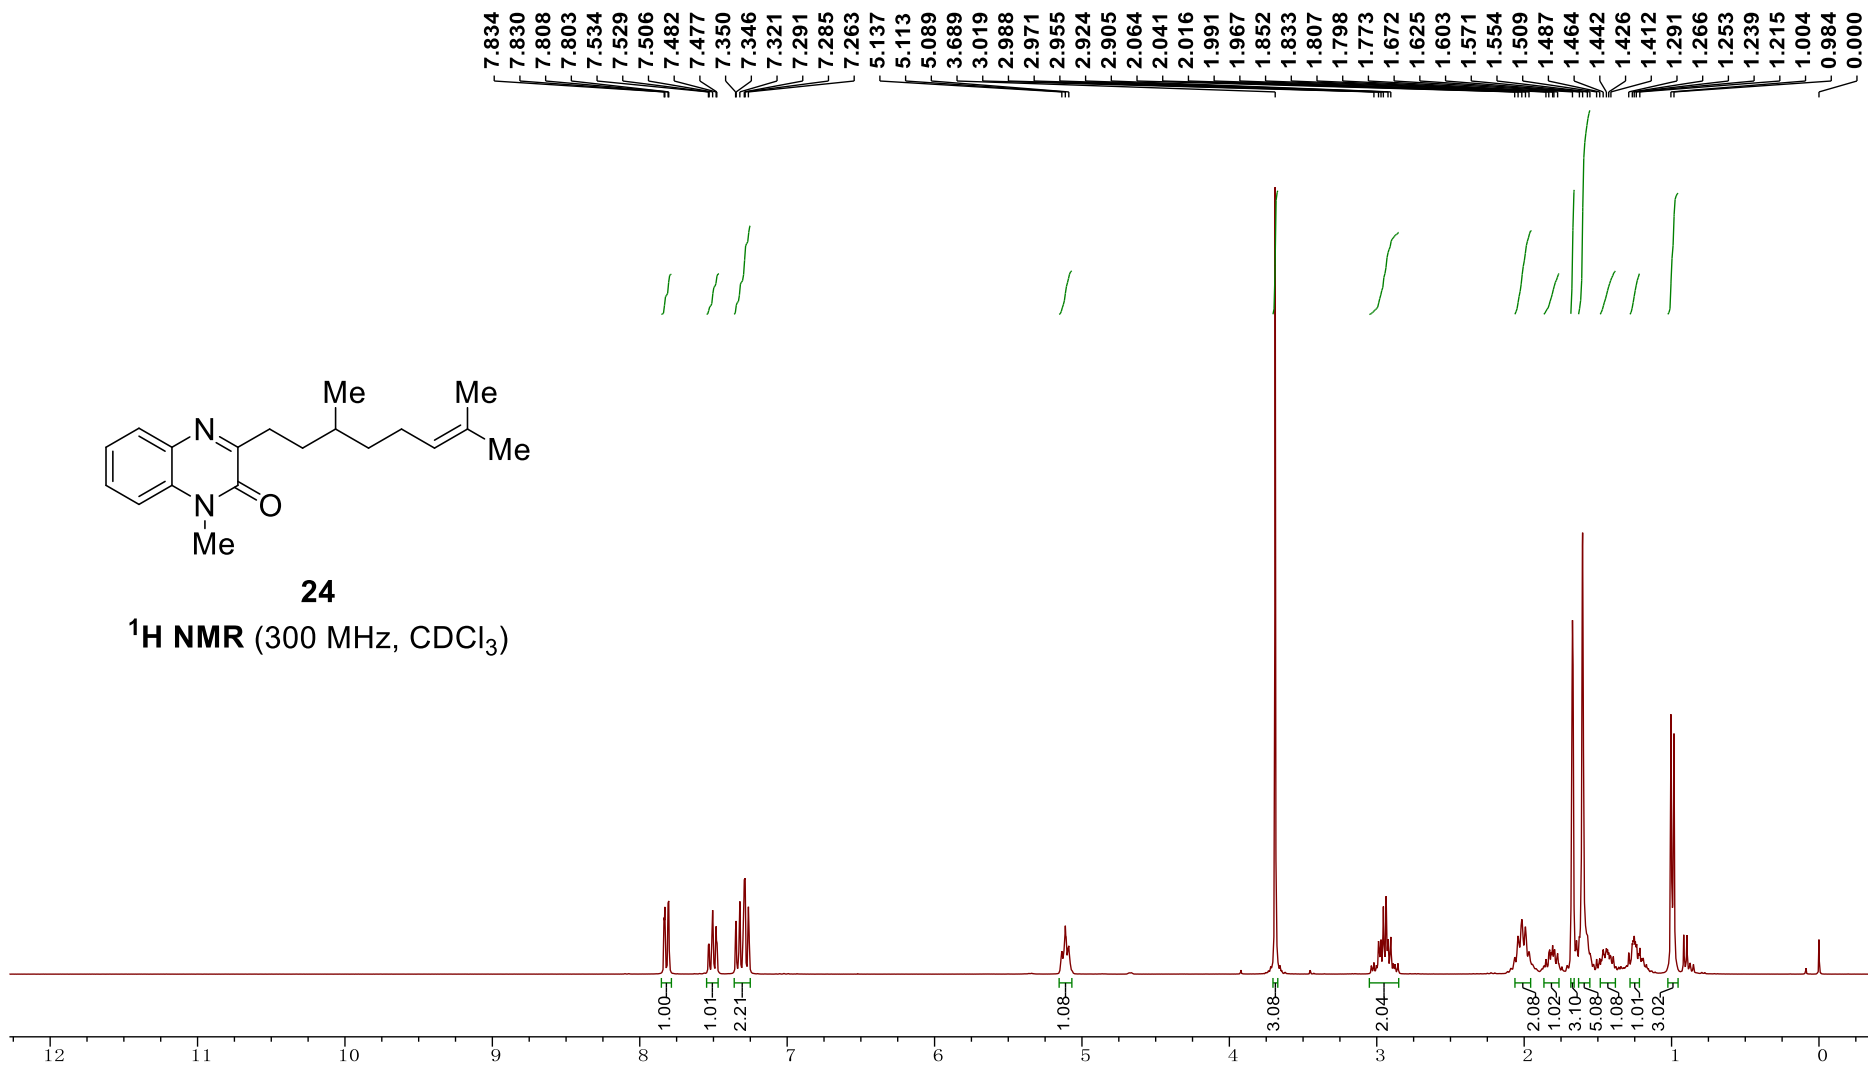

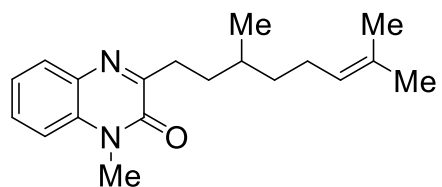

**24**

**<sup>13</sup>C NMR (101 MHz, CDCl<sub>3</sub>)**

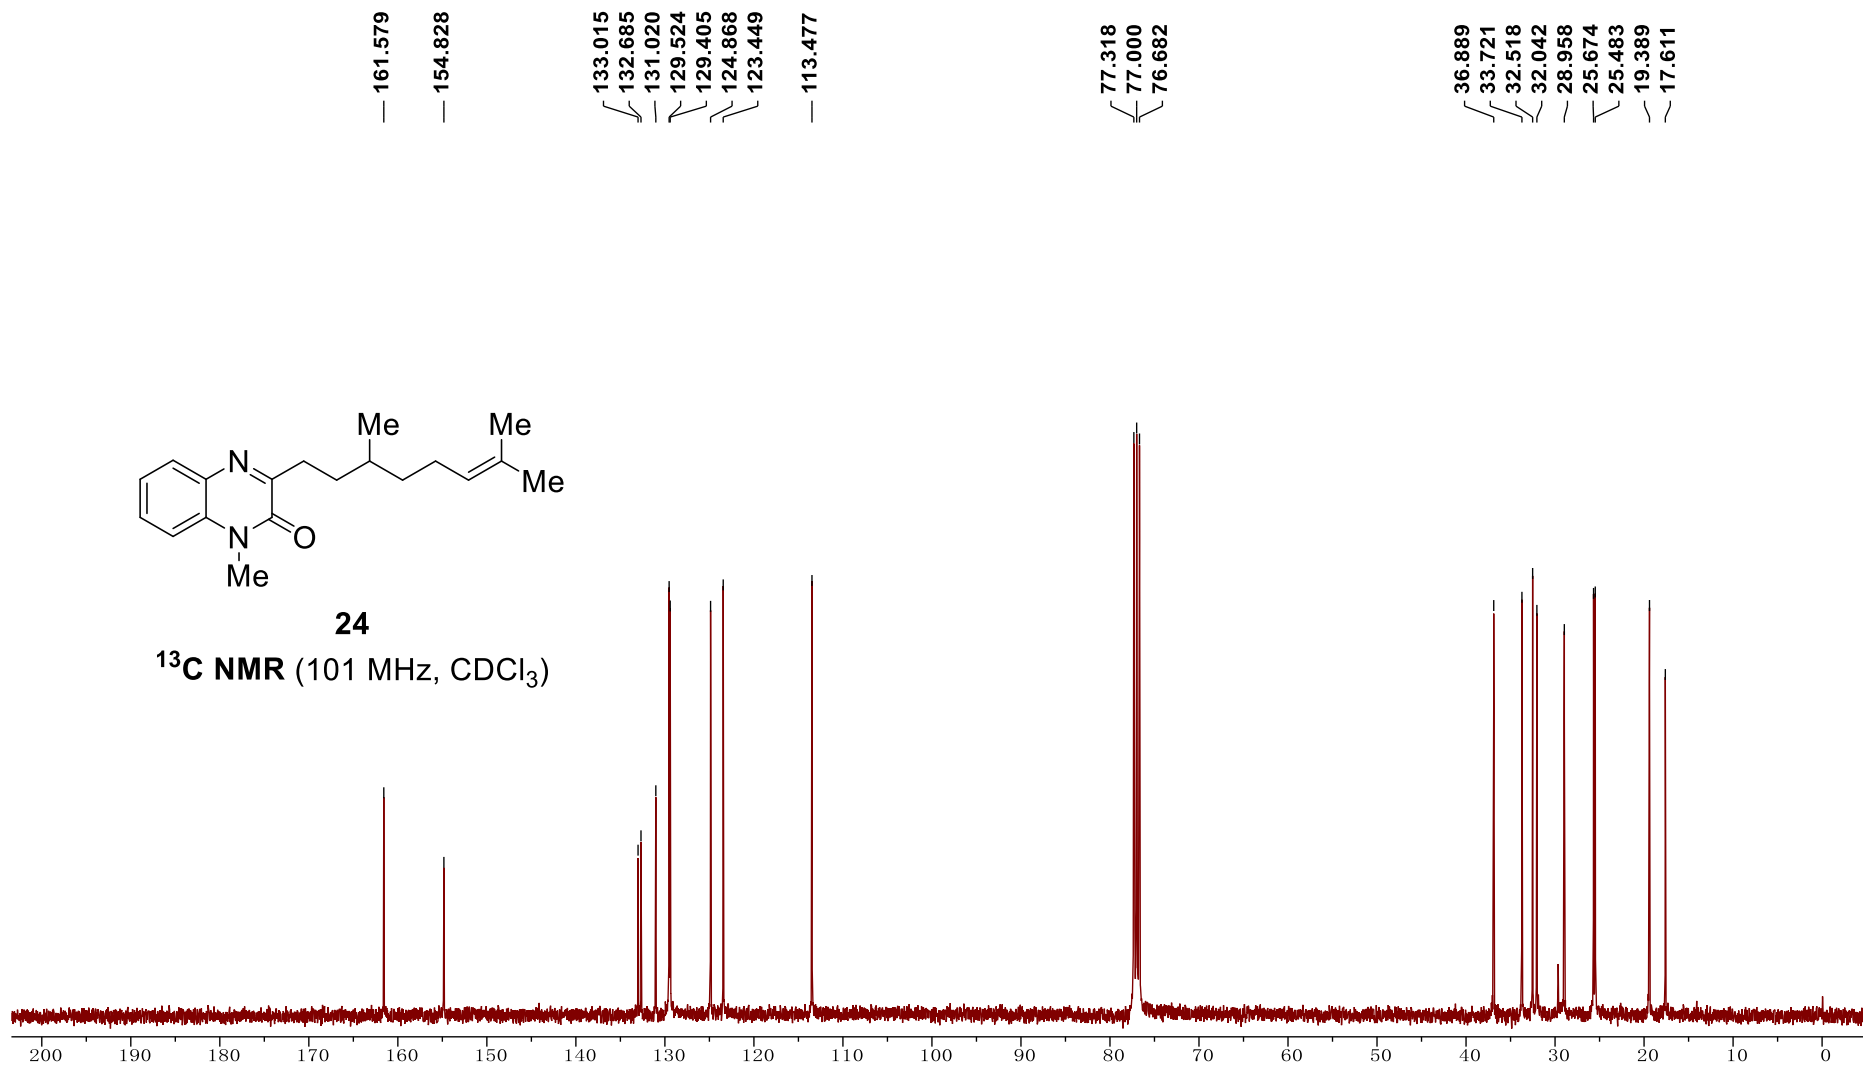

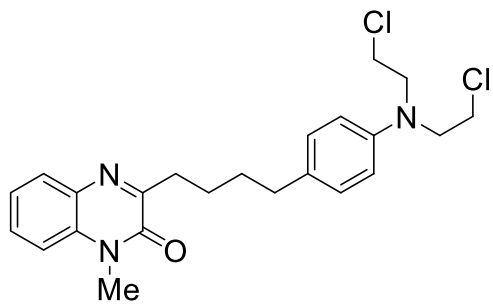

**25**

**<sup>1</sup>H NMR (400 MHz, CDCl<sub>3</sub>)**

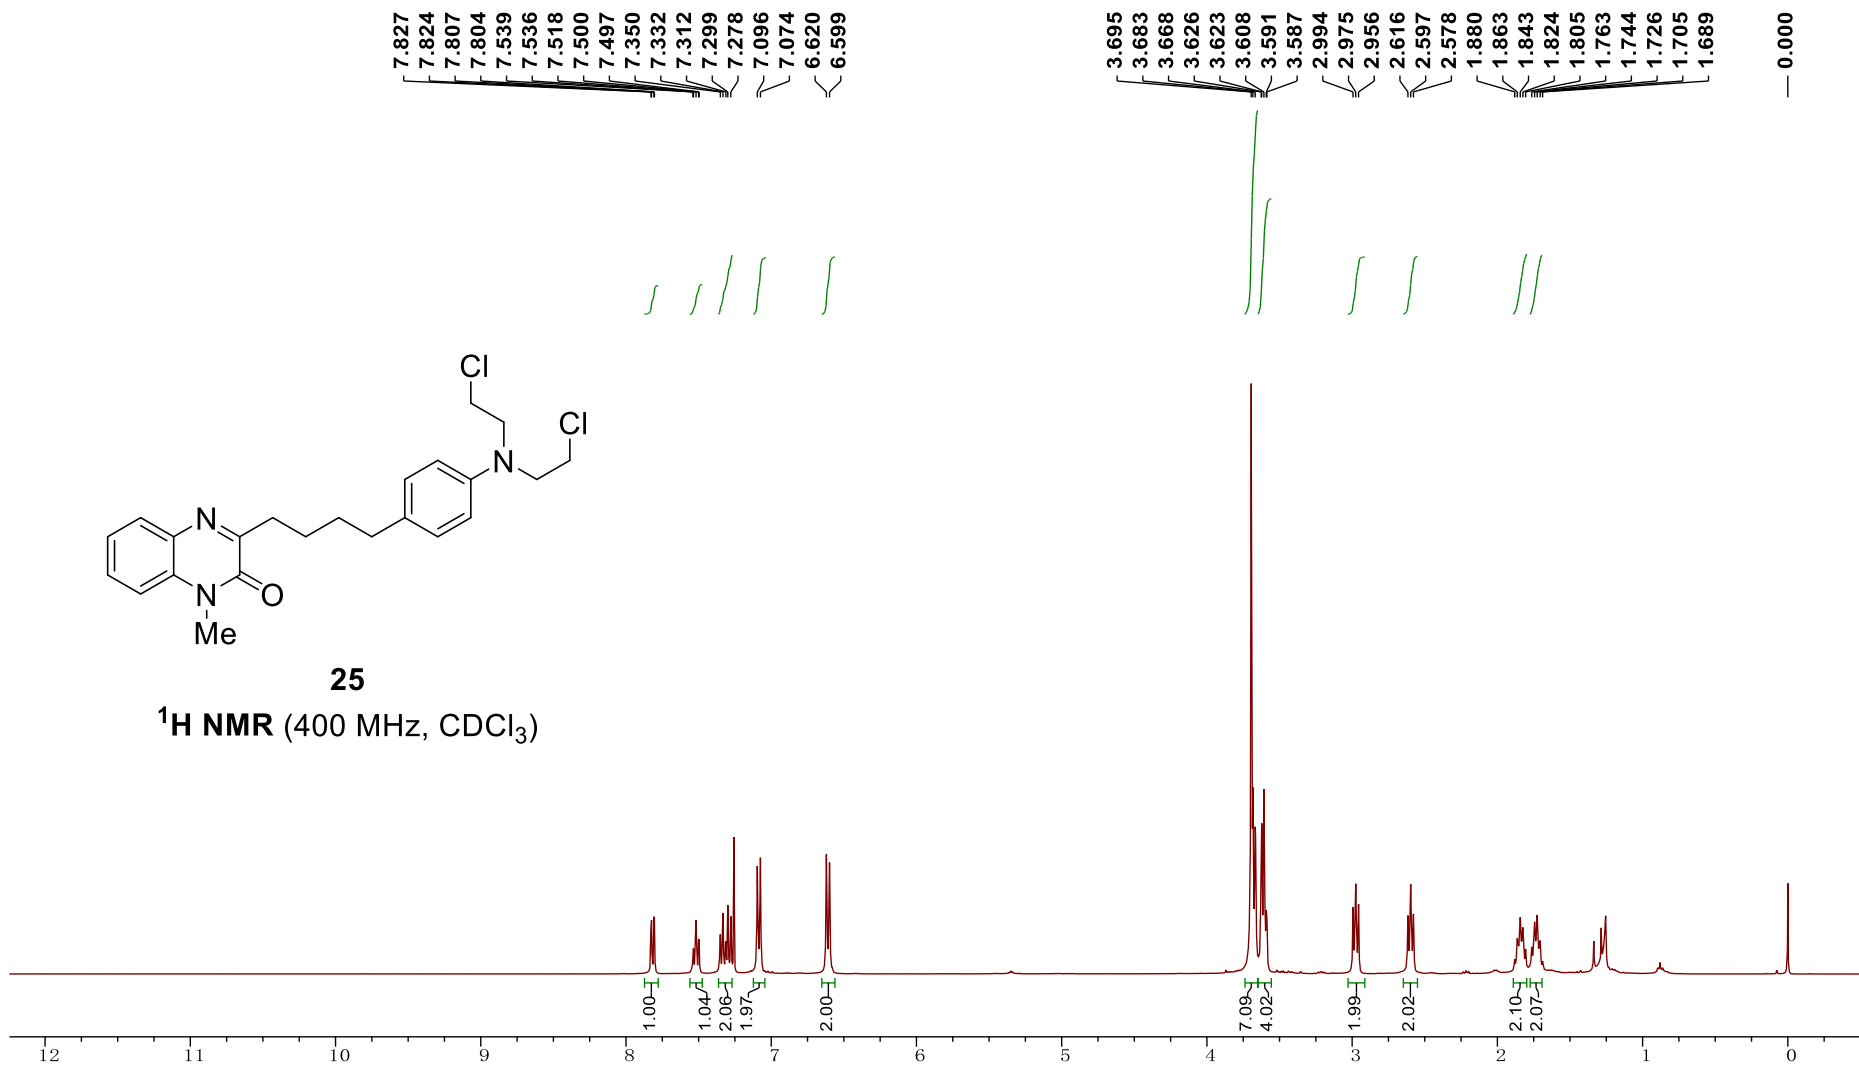

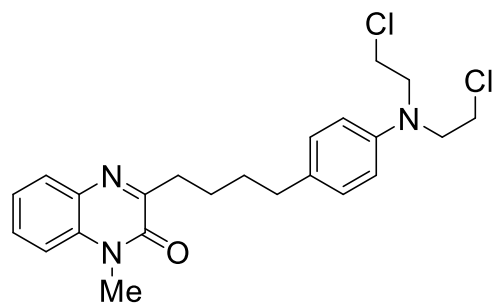

**25**

**<sup>13</sup>C NMR (101 MHz, CDCl<sub>3</sub>)**

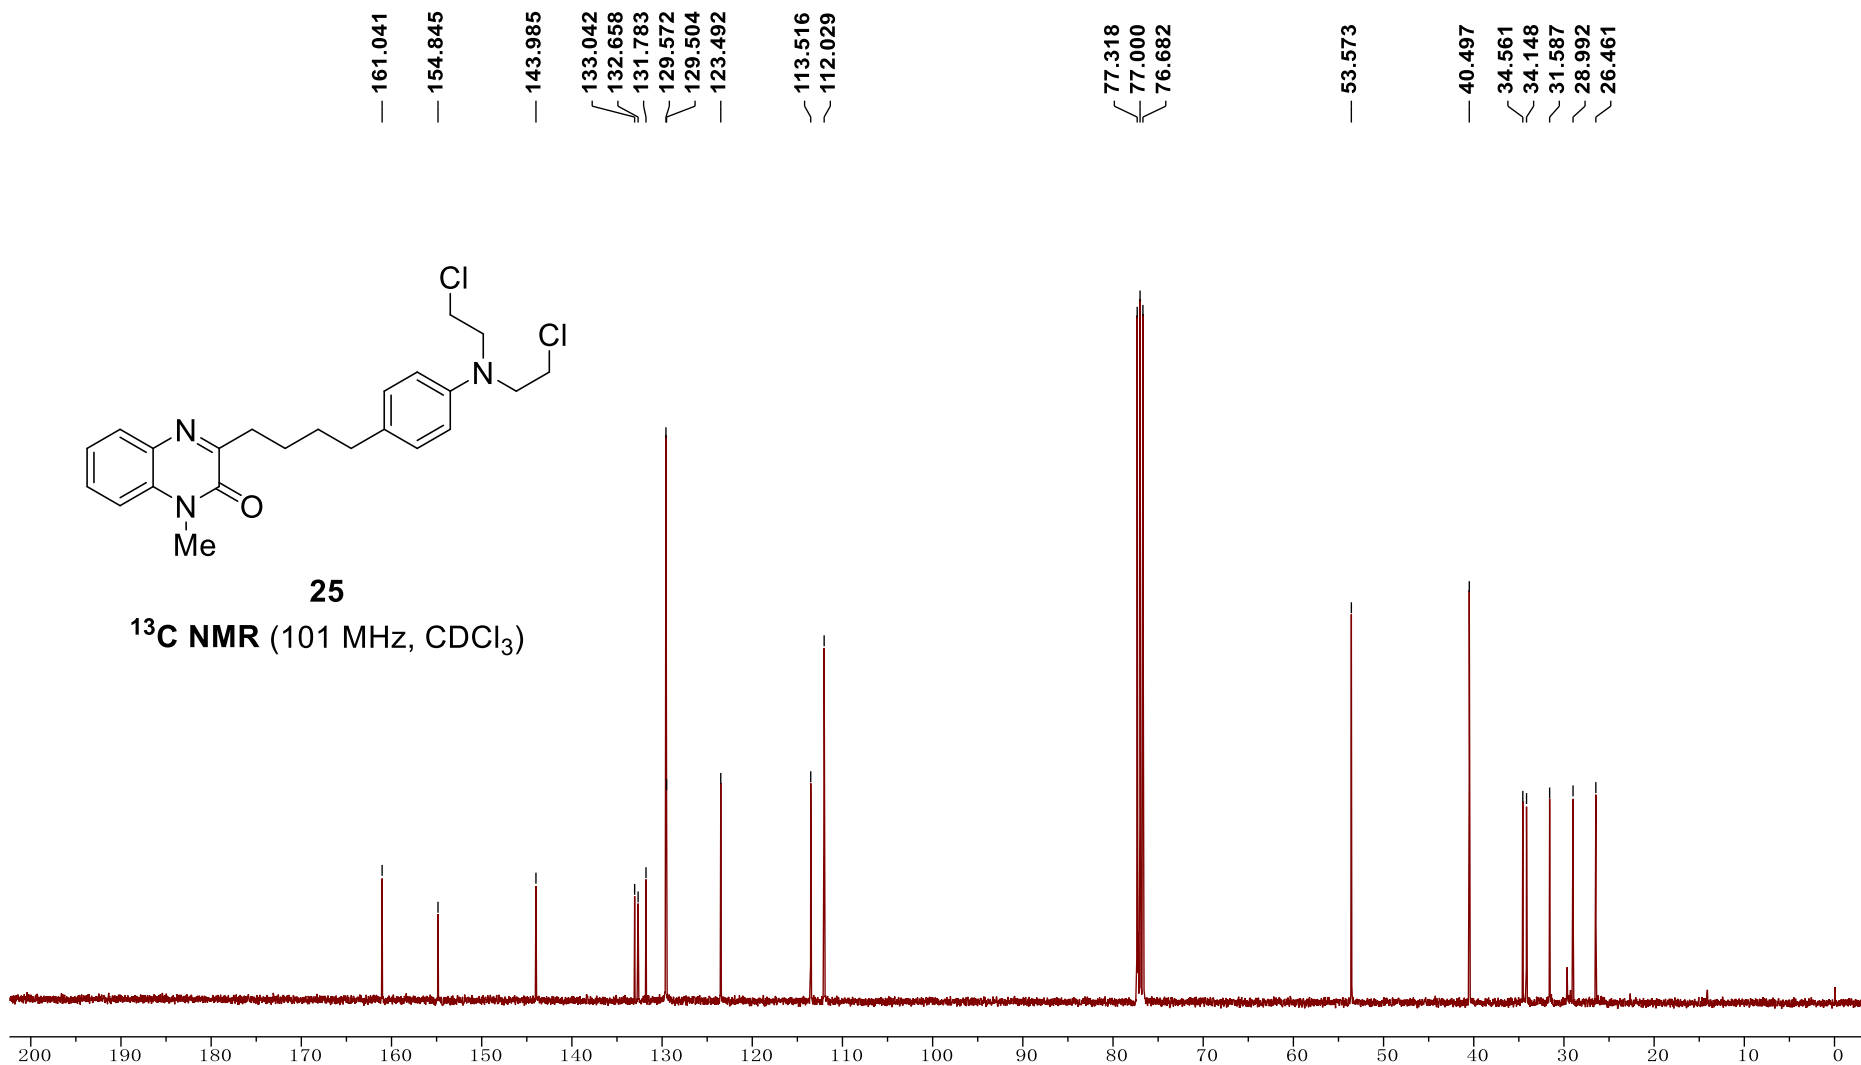



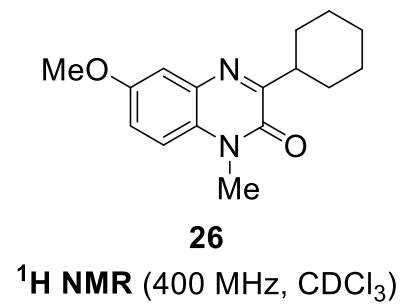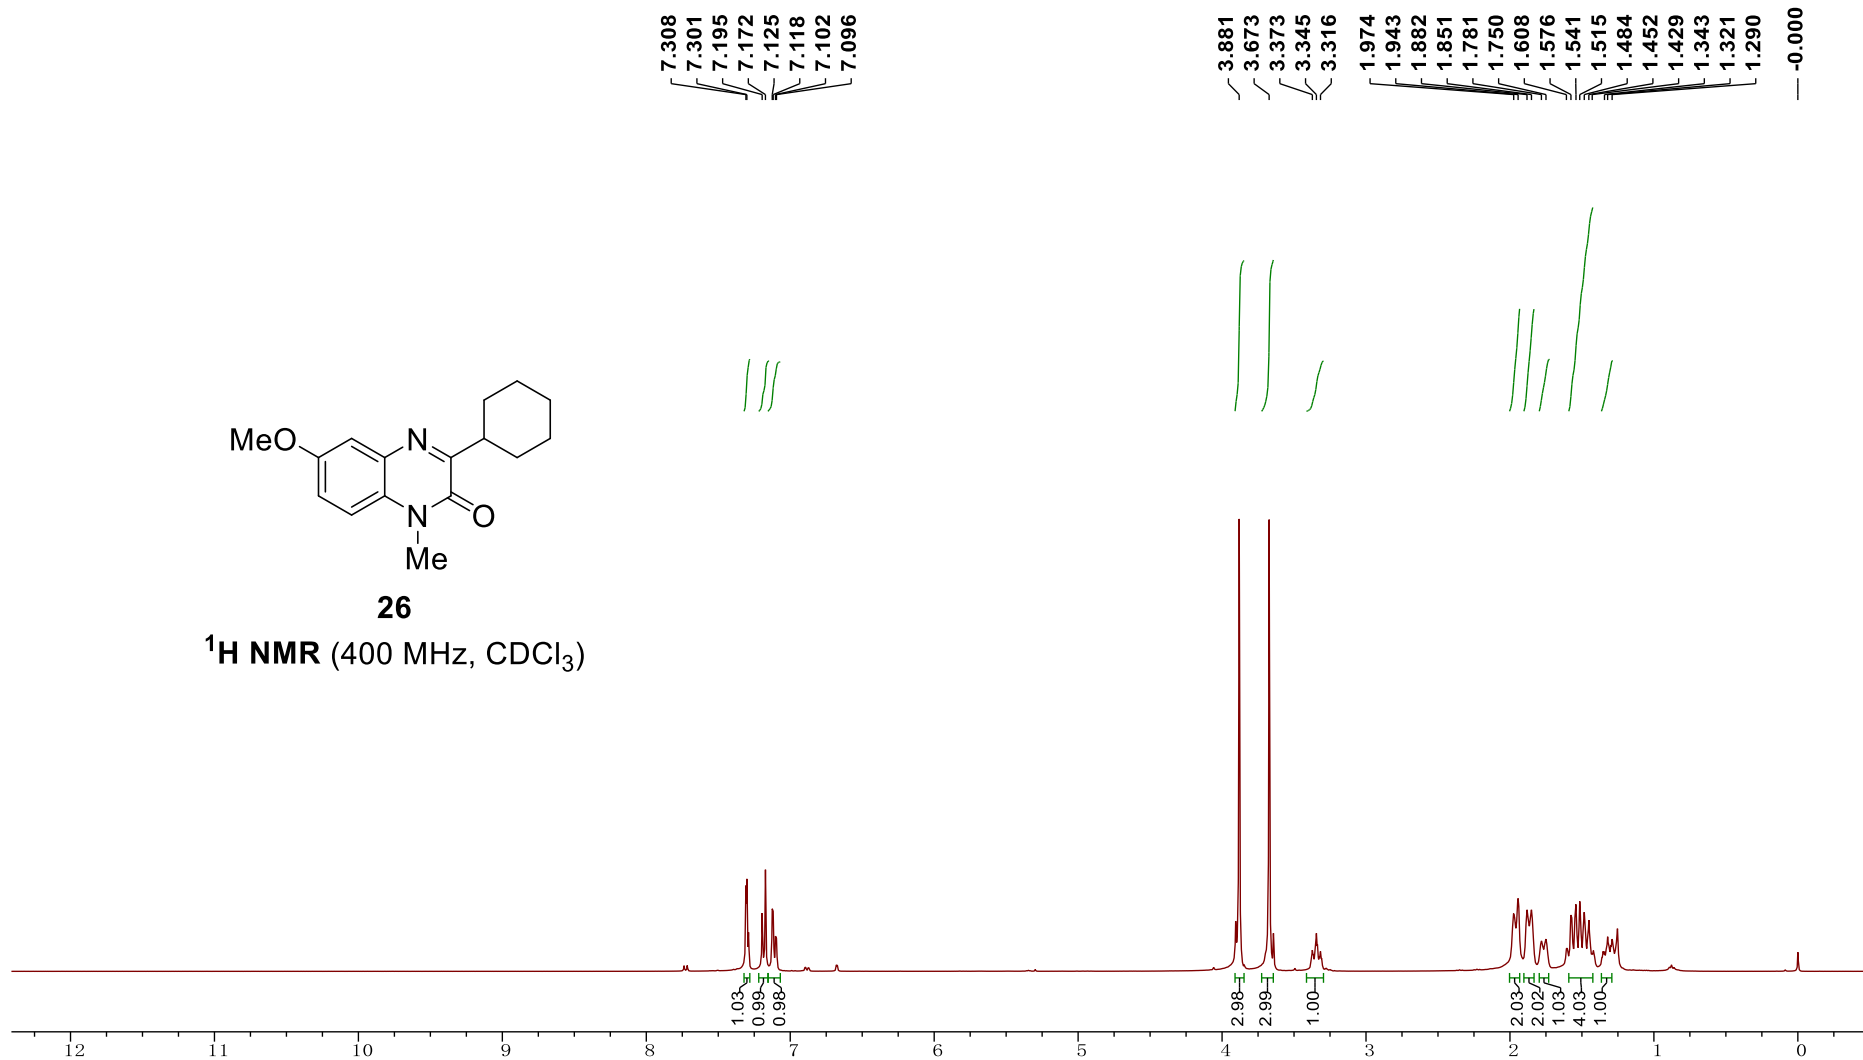

— 164.756  
— 155.738  
— 154.089  
— 133.513  
— 126.952  
— 118.449  
— 114.283  
— 111.112  
— 77.424  
— 77.000  
— 76.576  
— 55.667  
— 40.714  
— 30.490  
— 29.087  
— 26.235  
— 26.070

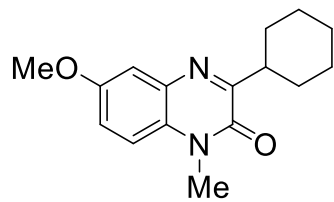

**26**

**<sup>13</sup>C NMR (75 MHz, CDCl<sub>3</sub>)**

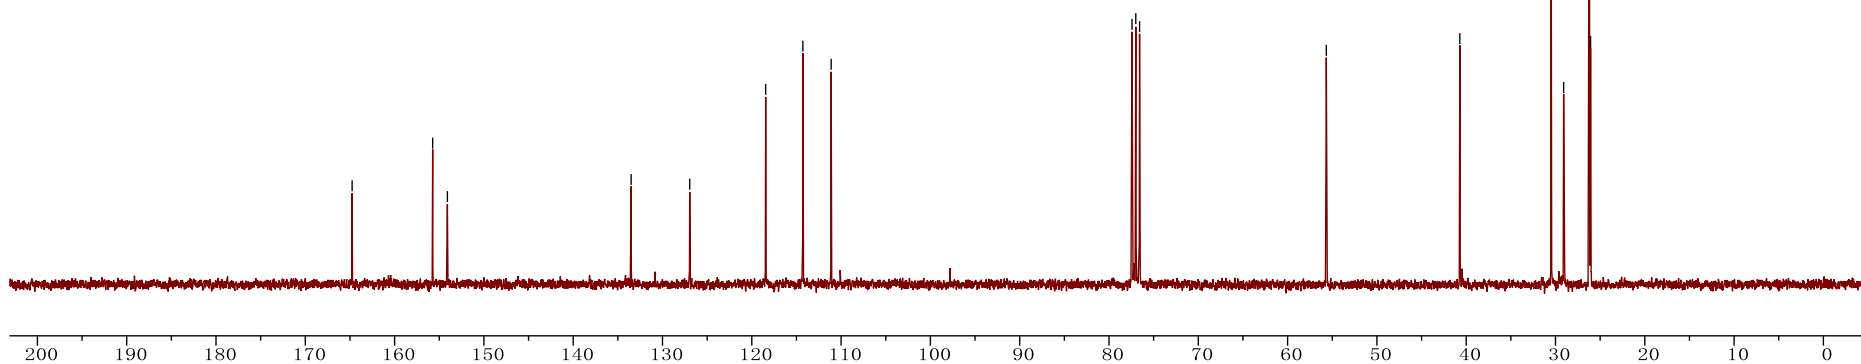

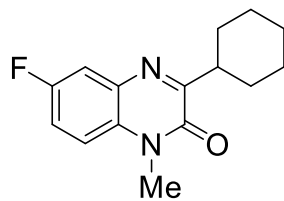

**27**

**<sup>1</sup>H NMR (300 MHz, CDCl<sub>3</sub>)**

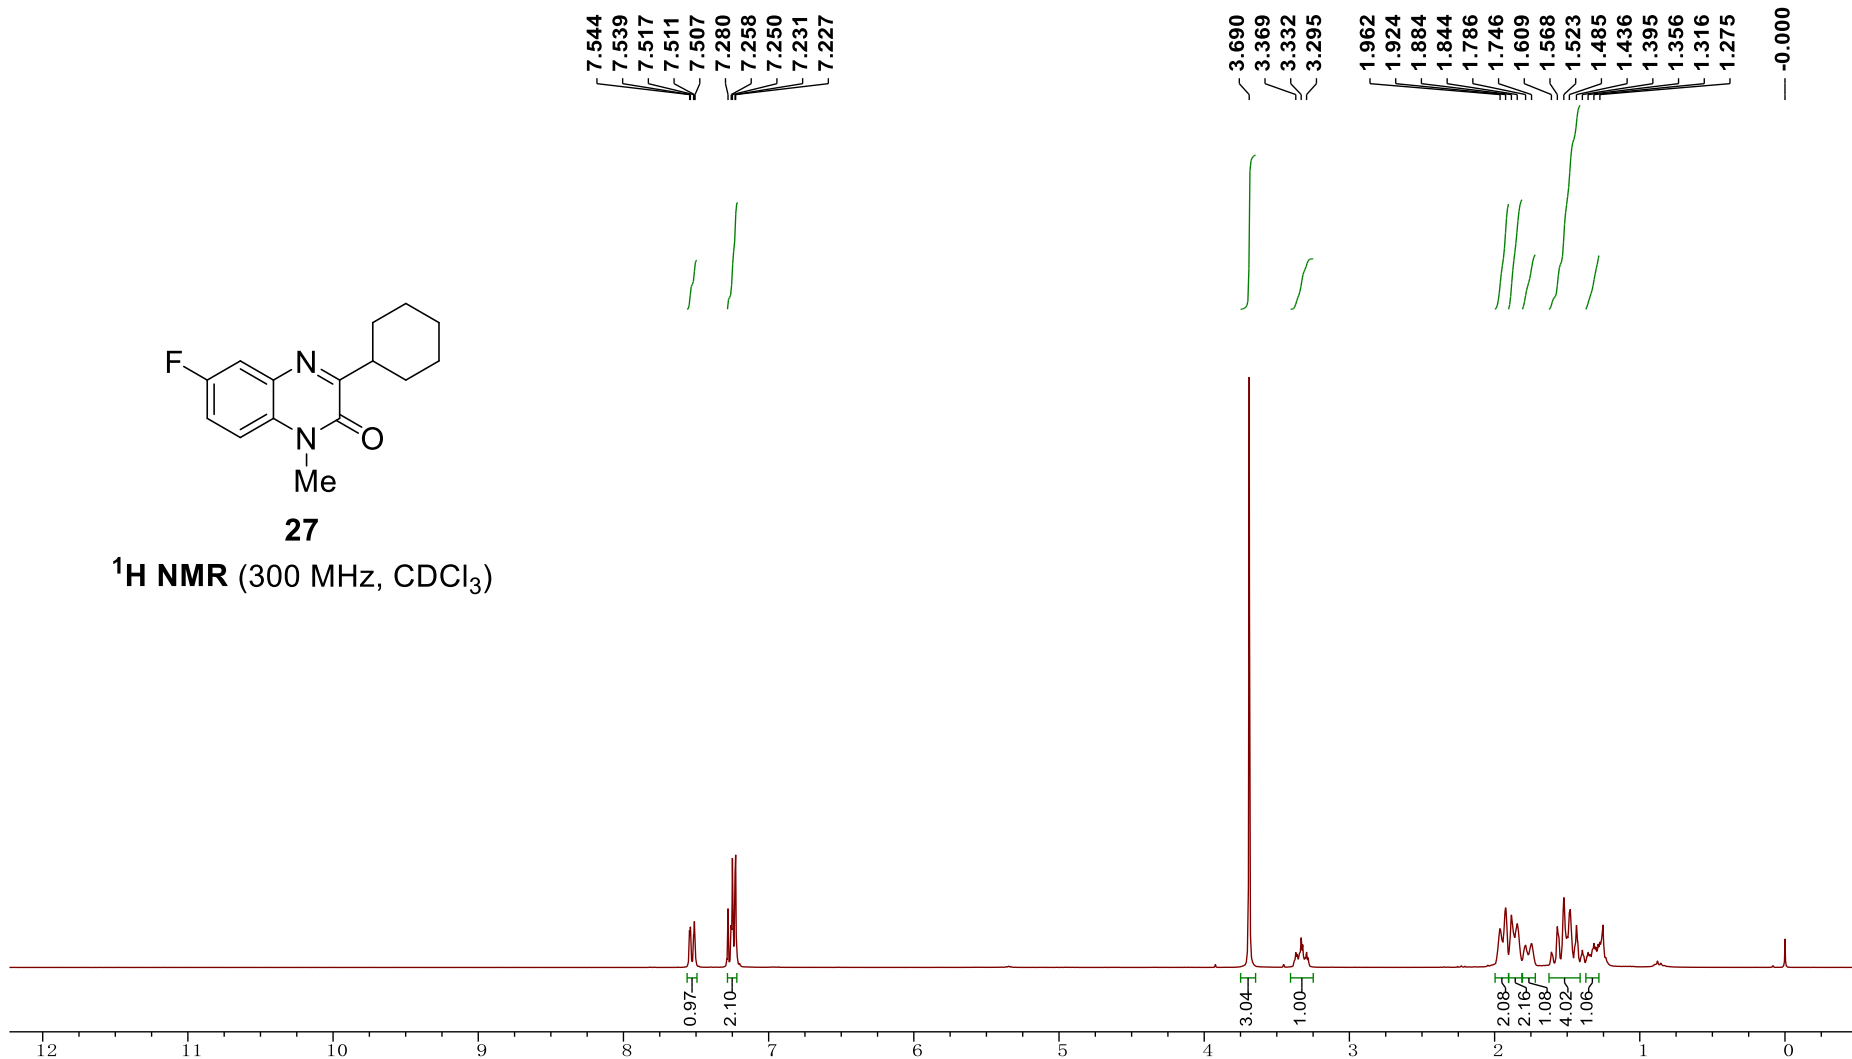

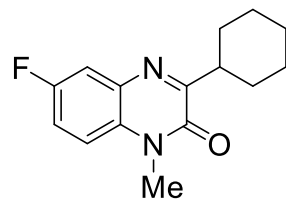

**27**

**<sup>13</sup>C NMR (75 MHz, CDCl<sub>3</sub>)**

165.756  
160.158  
156.938  
154.094

133.489  
133.341  
129.458  
129.431  
117.070  
116.753  
115.283  
114.986  
114.472  
114.355

77.424  
77.000  
76.576

40.790

30.411  
29.239  
26.188  
26.053

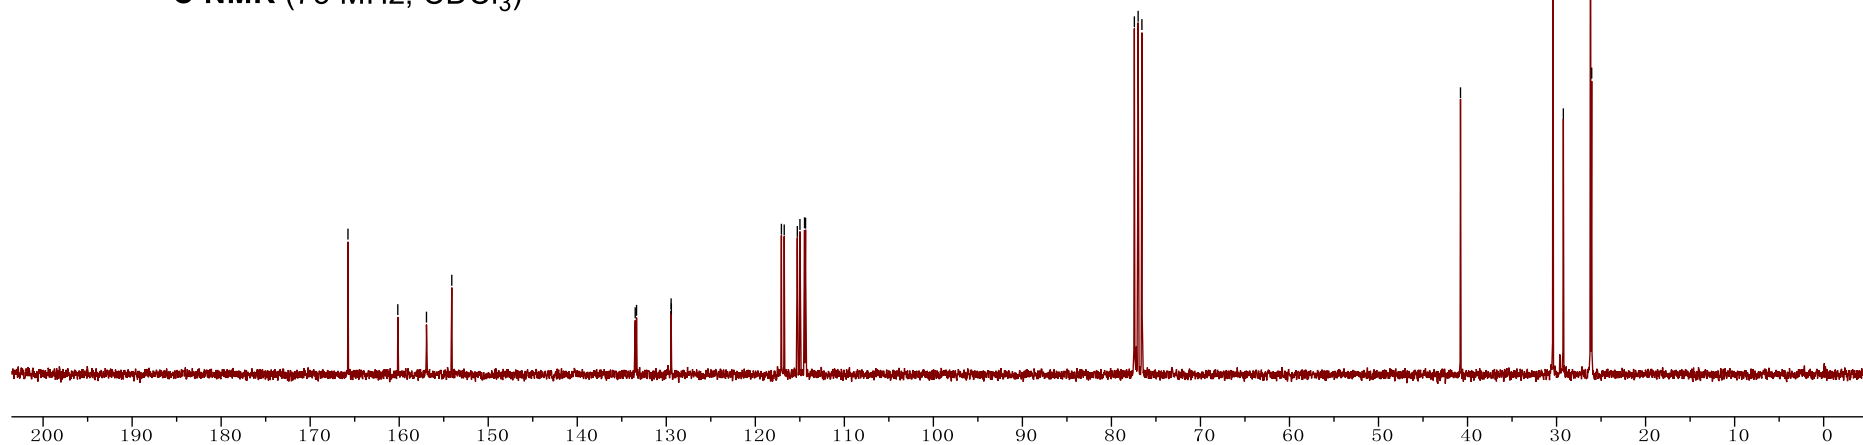

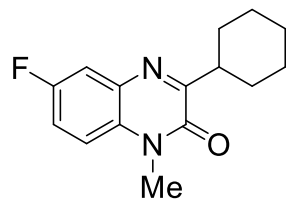

**27**

**<sup>19</sup>F NMR (282 MHz, CDCl<sub>3</sub>)**

— -119.505

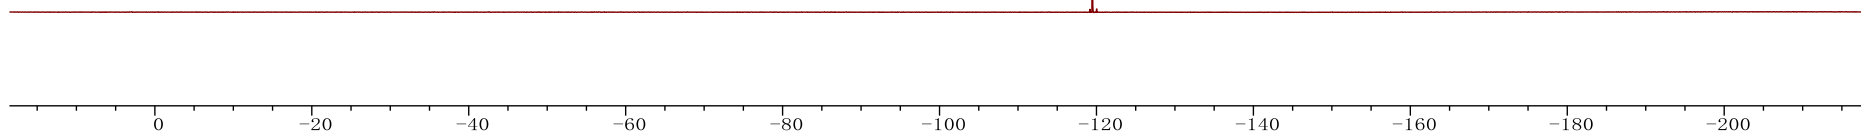

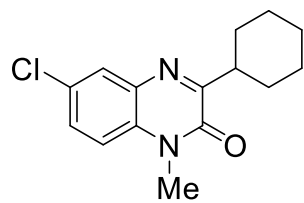

**28**

<sup>1</sup>H NMR (300 MHz, CDCl<sub>3</sub>)

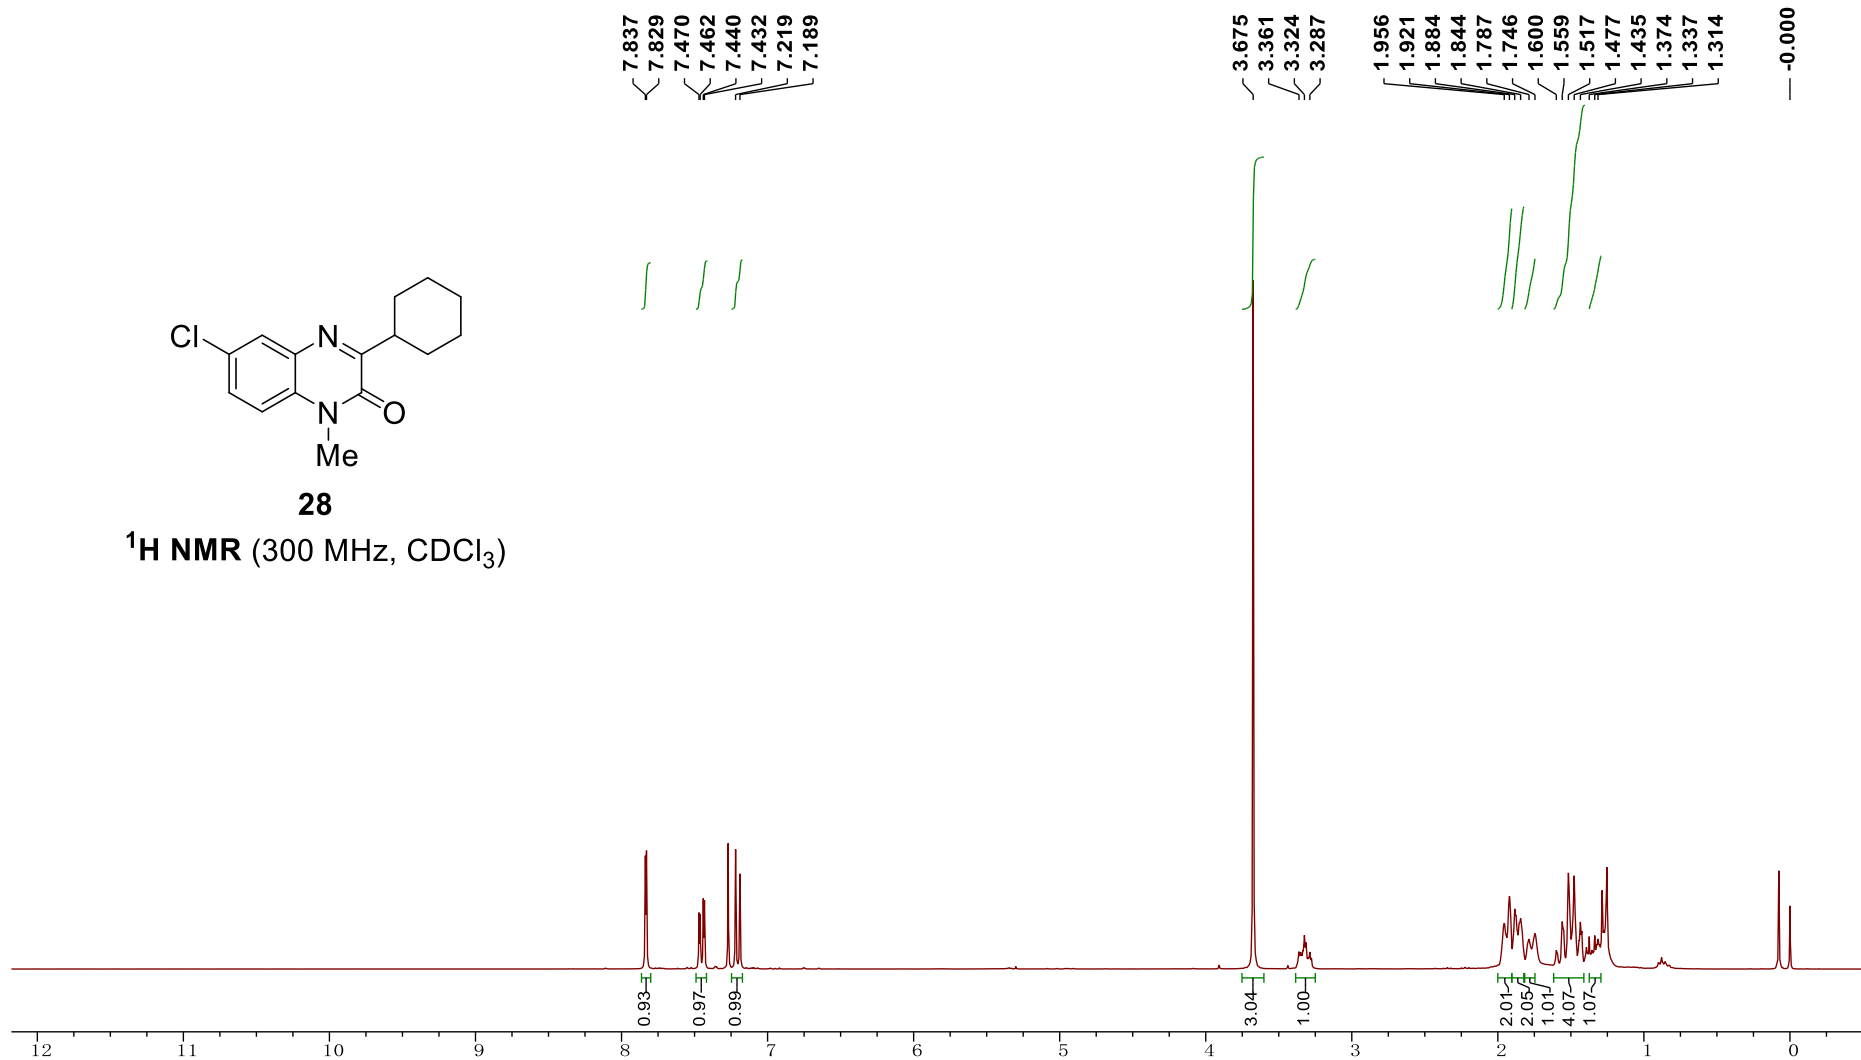

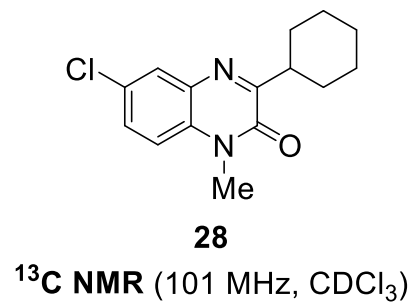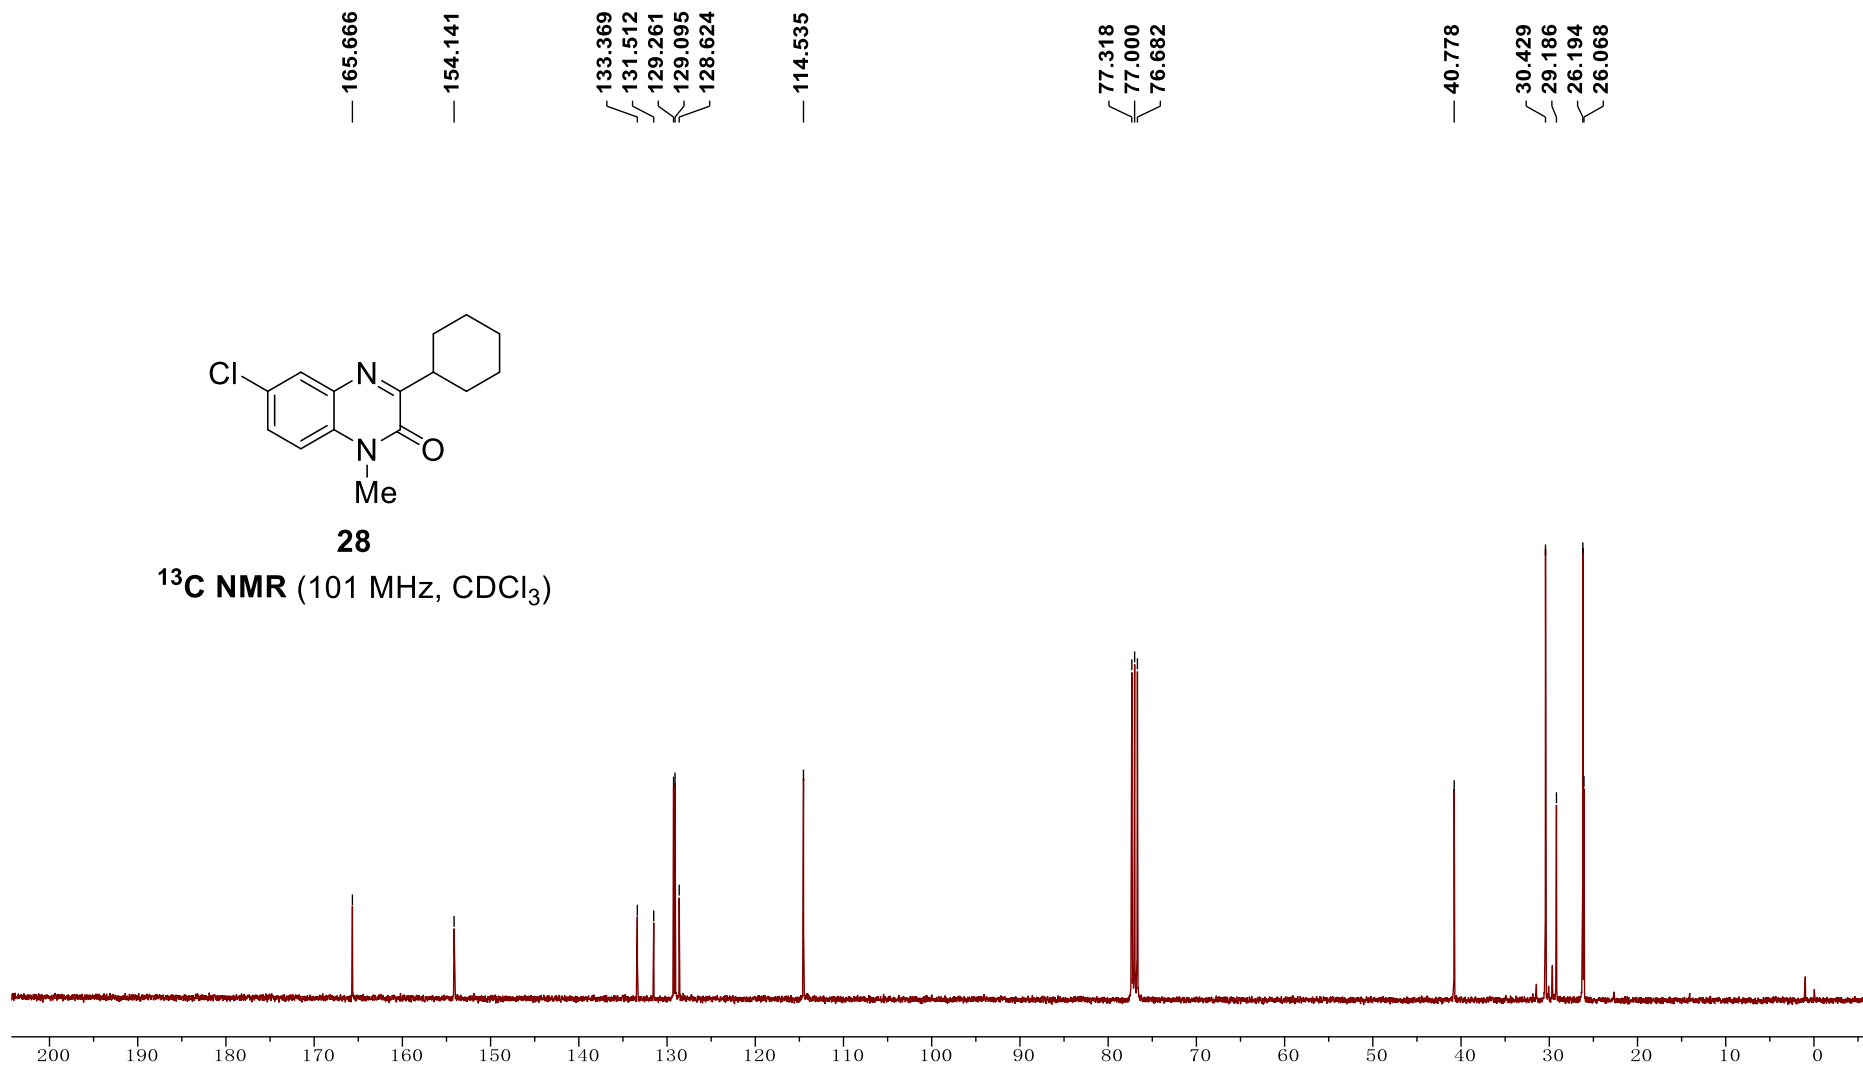

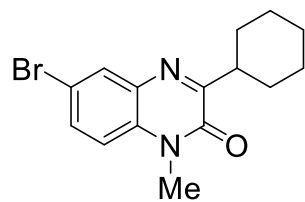

**29**

<sup>1</sup>H NMR (400 MHz, CDCl<sub>3</sub>)

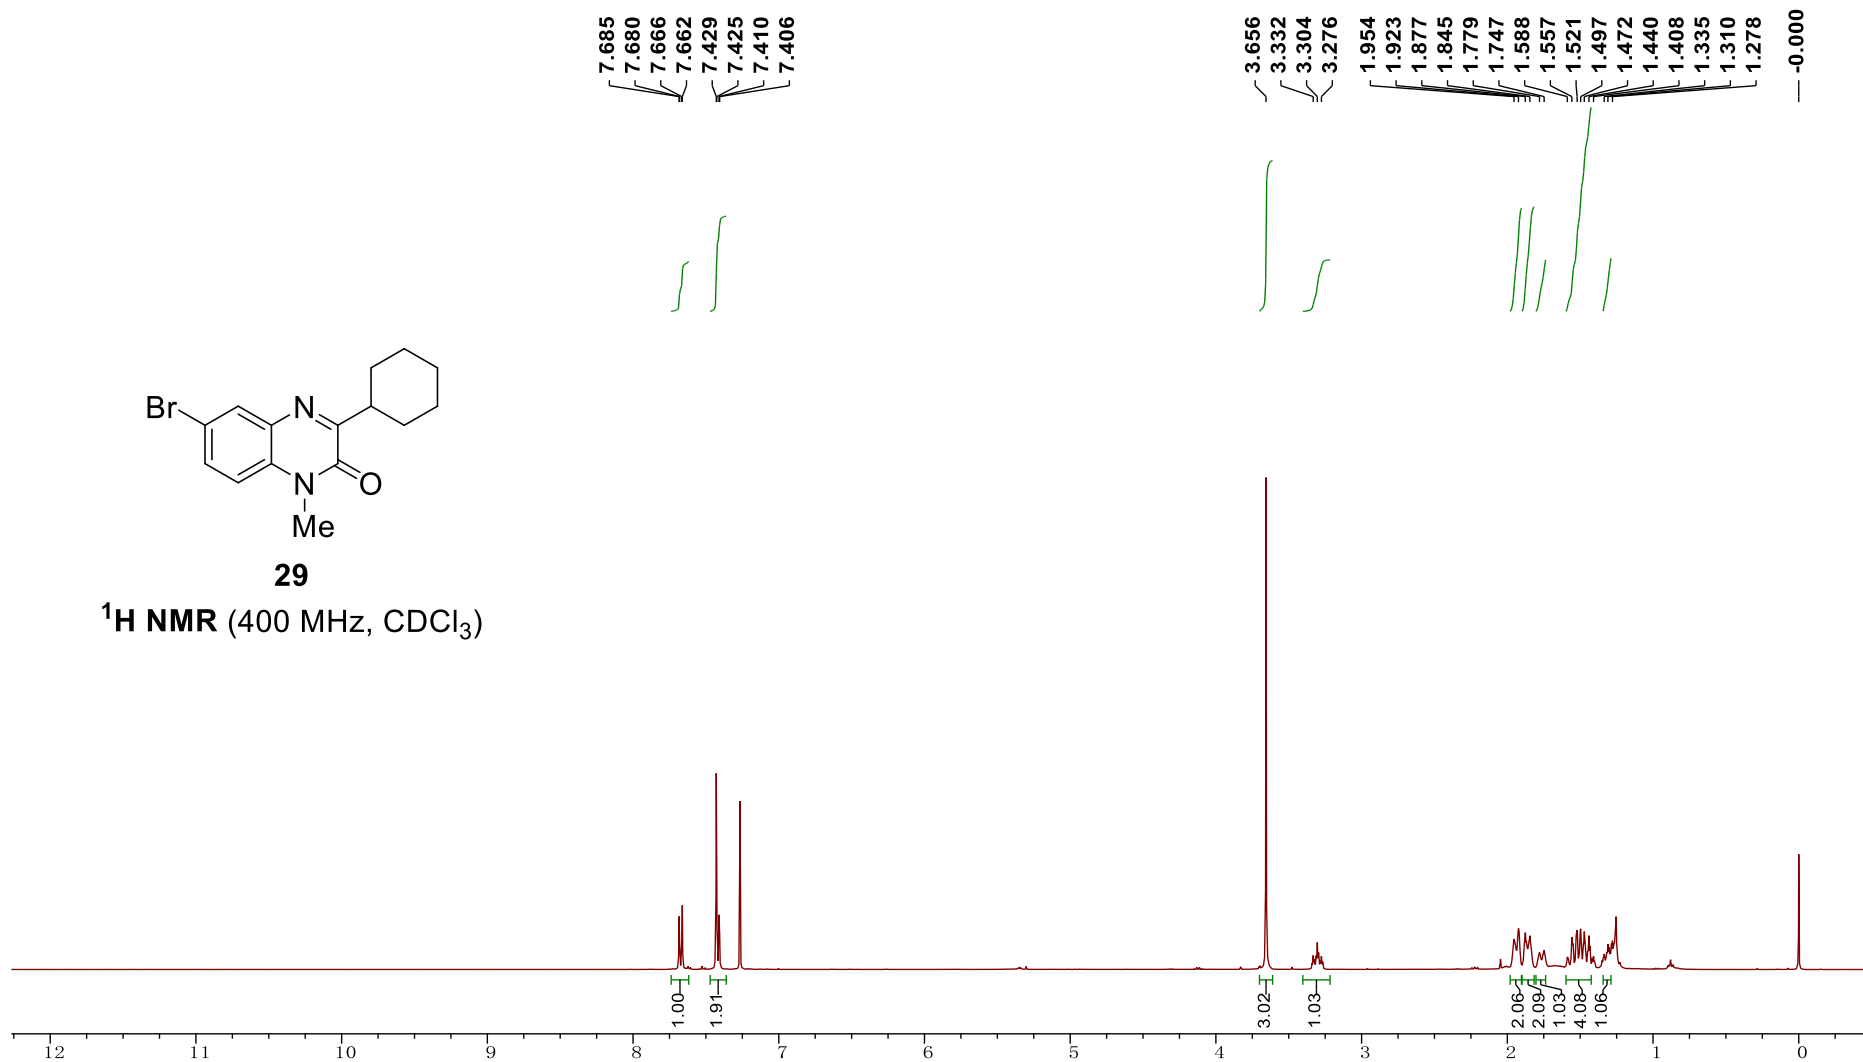



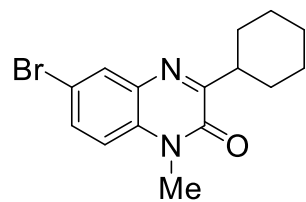

**29**

<sup>13</sup>C NMR (75 MHz, CDCl<sub>3</sub>)

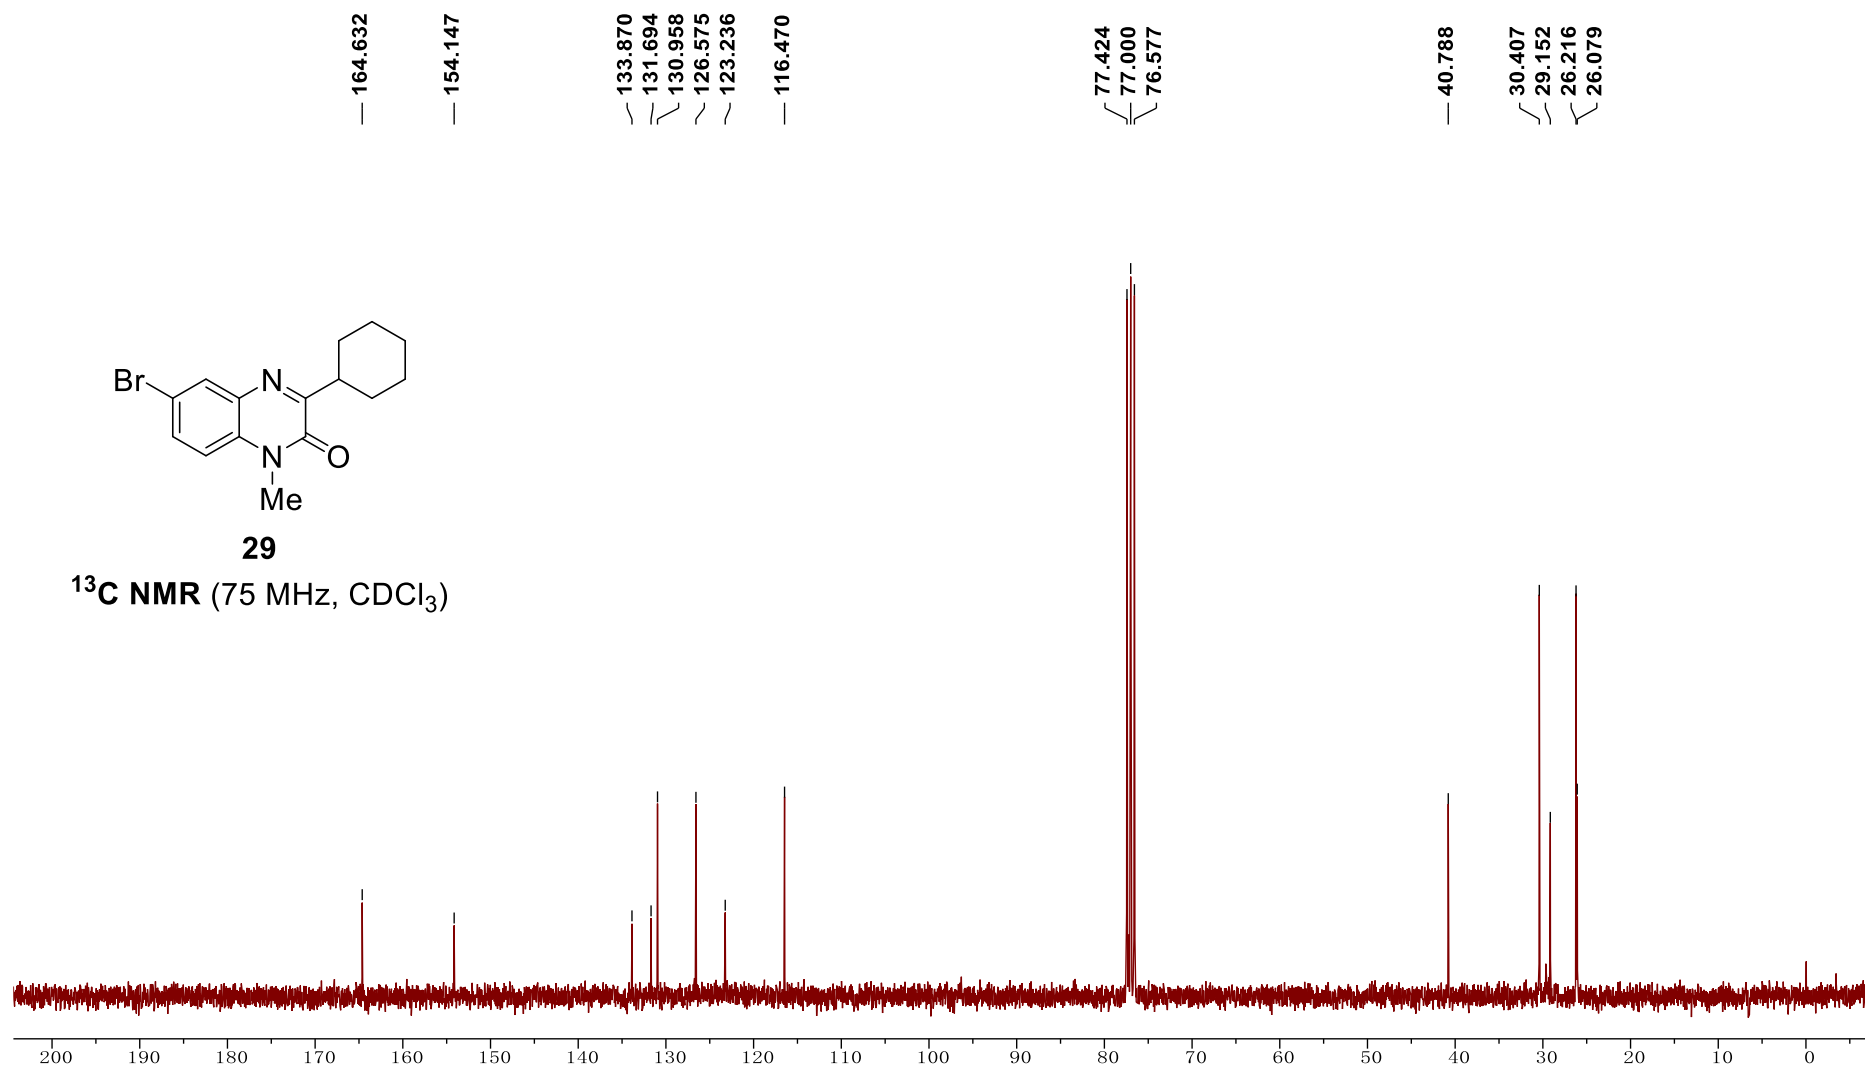

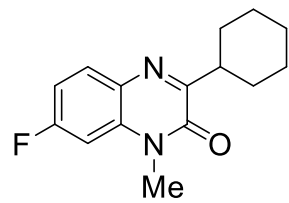

**30**

**<sup>1</sup>H NMR (400 MHz, CDCl<sub>3</sub>)**

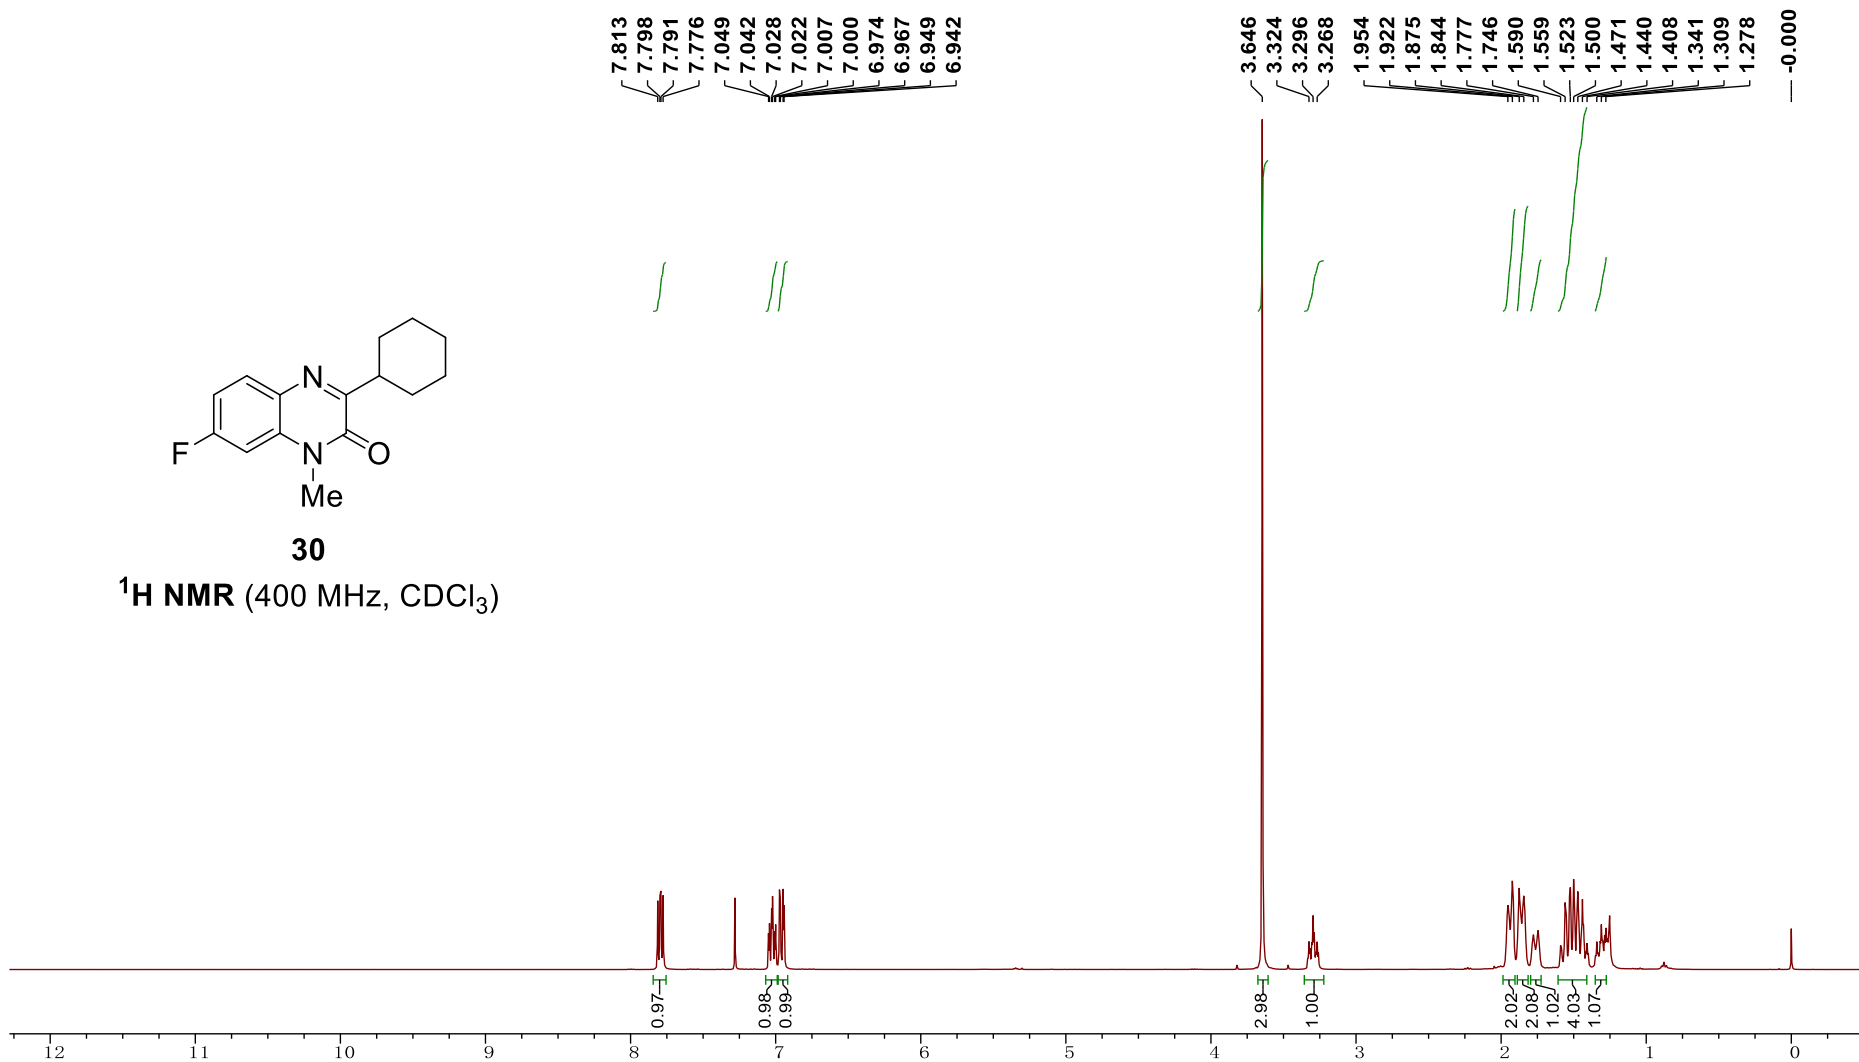

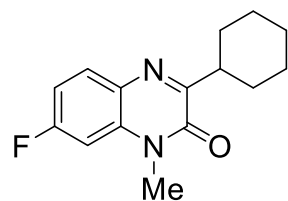

**30**

**<sup>13</sup>C NMR (101 MHz, CDCl<sub>3</sub>)**

163.979  
163.022  
162.989  
161.502  
— 154.311

134.205  
134.091  
131.538  
131.436  
129.550  
129.528

111.106  
110.874

100.448  
100.172

77.318  
77.000  
76.682

— 40.582

30.417  
29.227  
26.214  
26.067

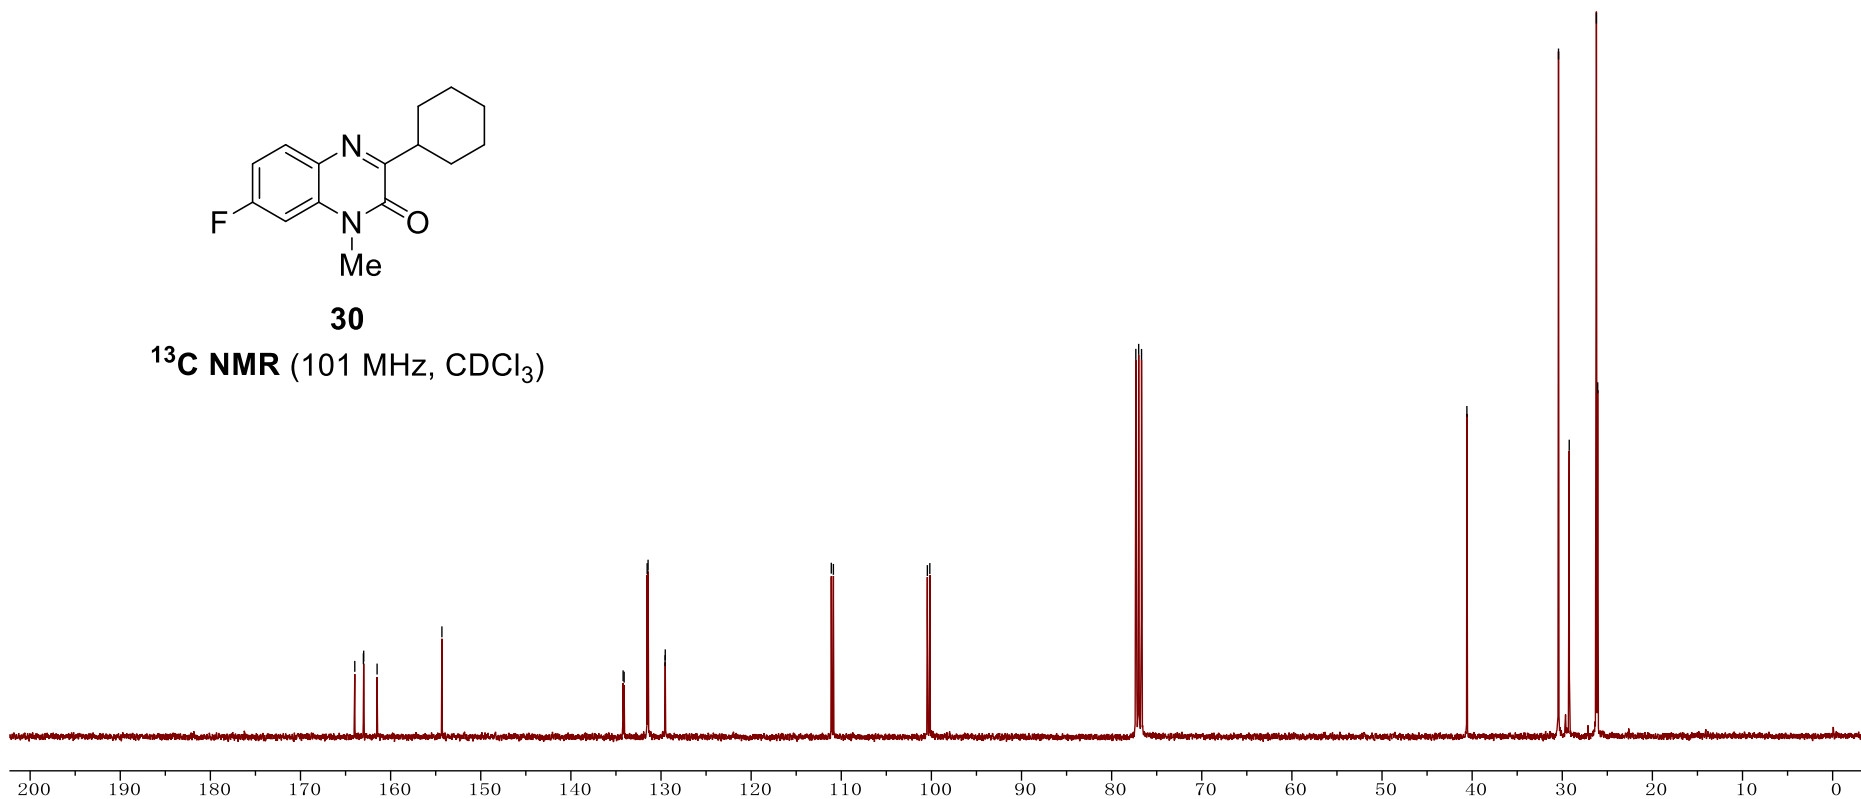

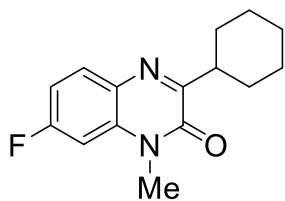

**30**

**<sup>19</sup>F NMR (376 MHz, CDCl<sub>3</sub>)**

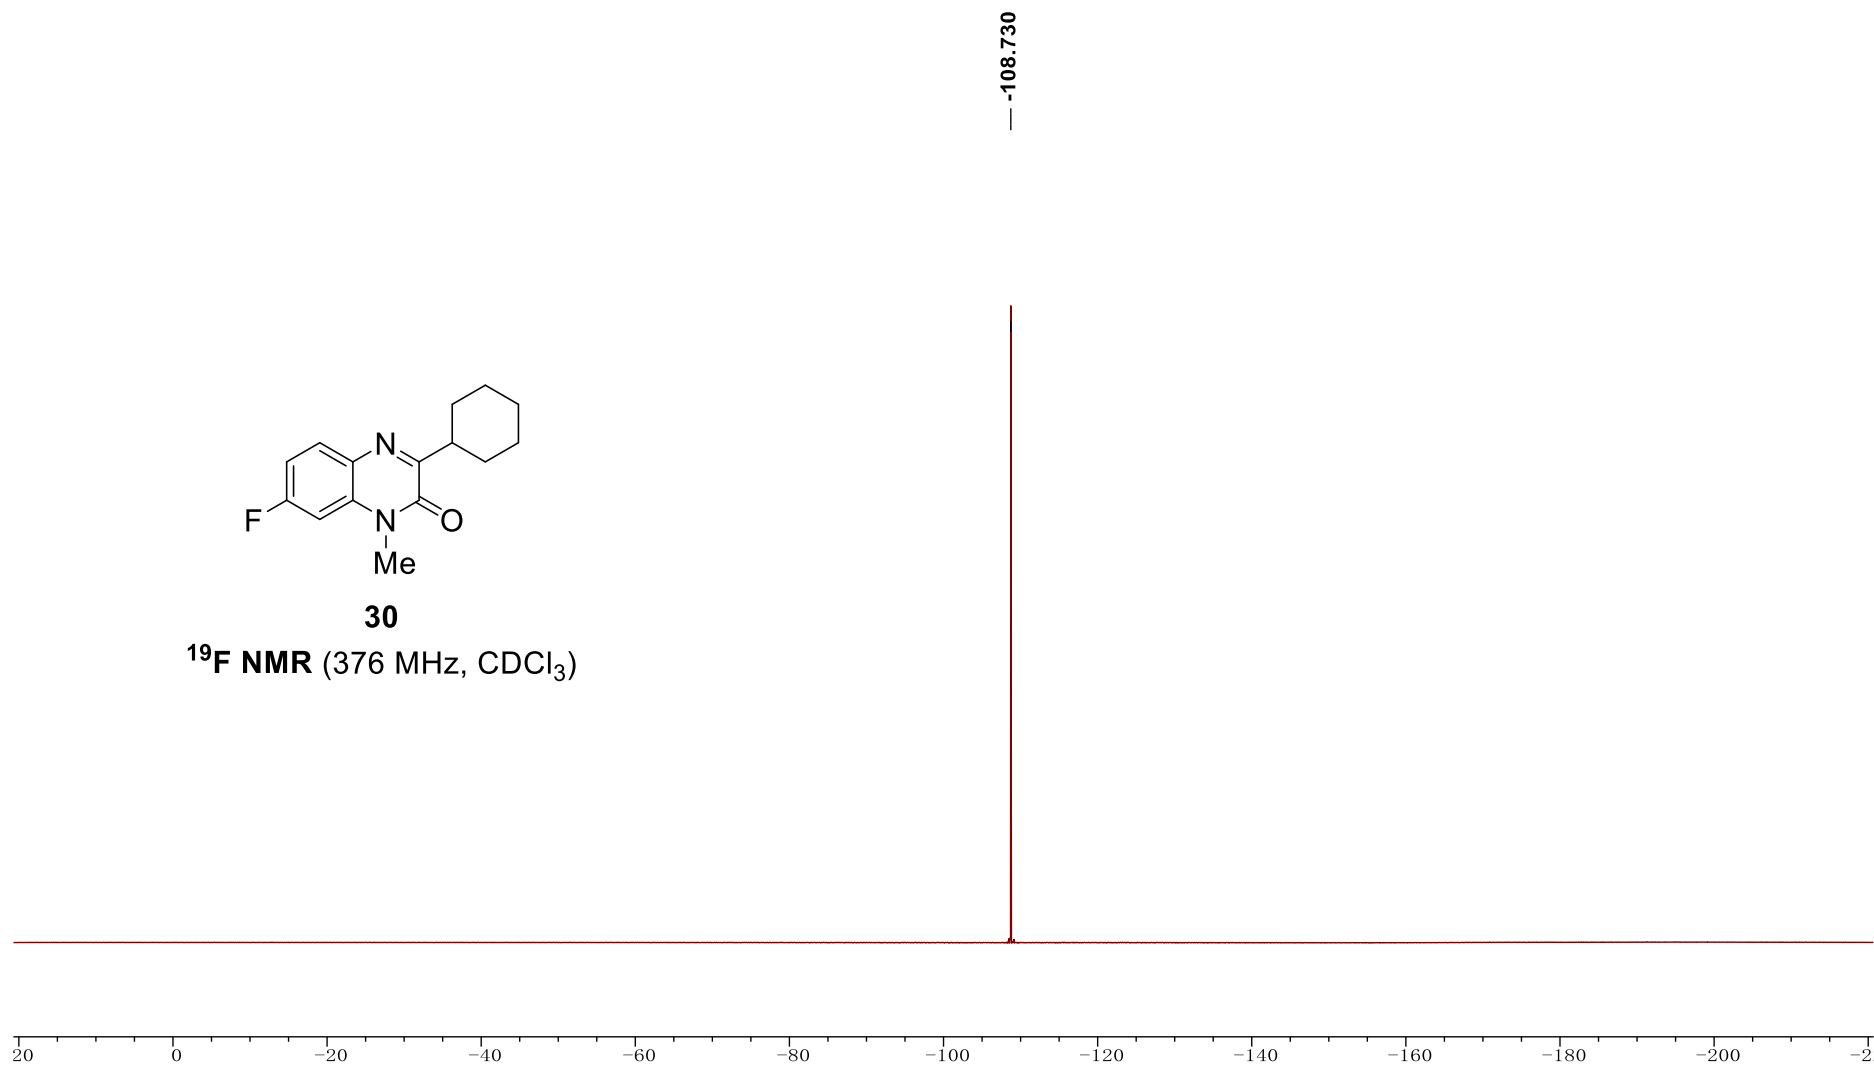

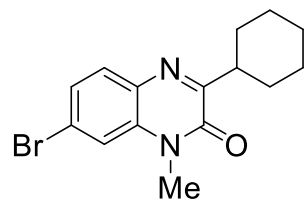

**31**

<sup>1</sup>H NMR (400 MHz, CDCl<sub>3</sub>)

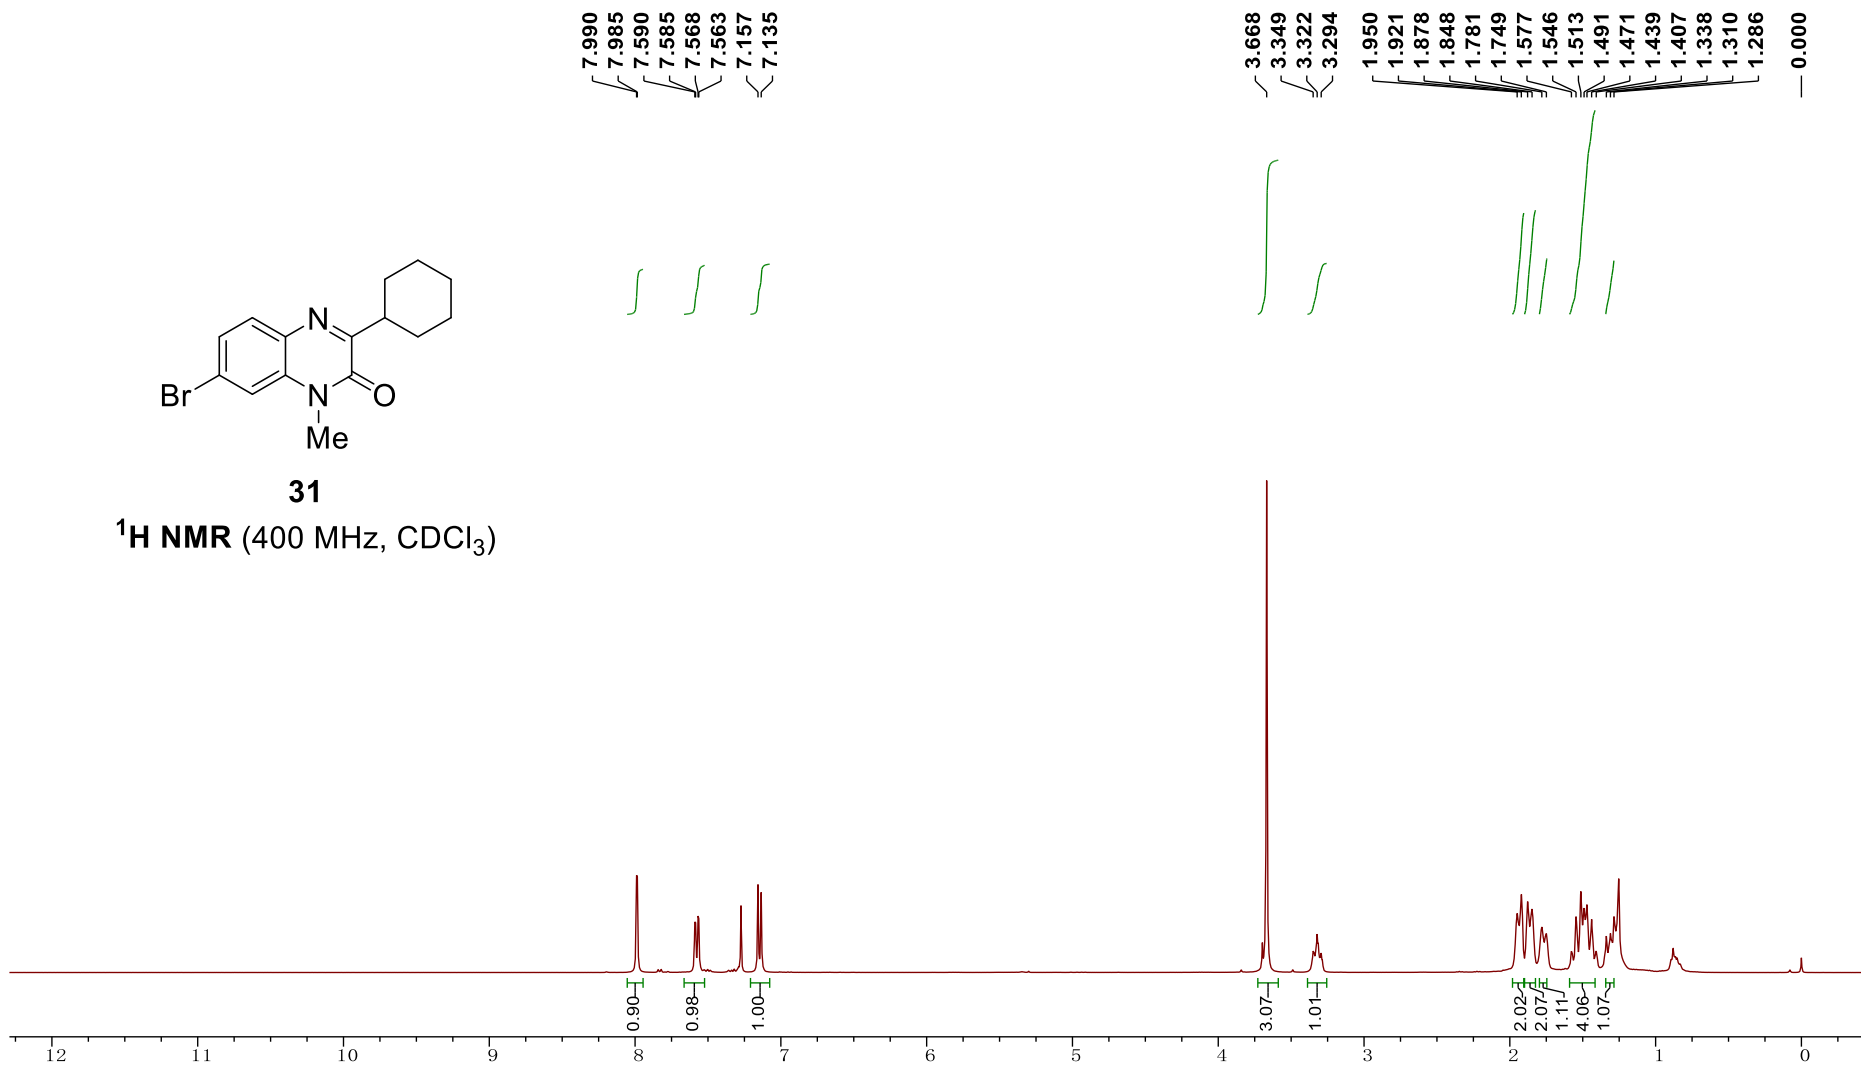

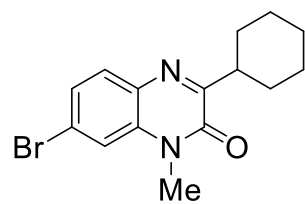

**31**

**$^{13}\text{C}$  NMR (75 MHz,  $\text{CDCl}_3$ )**

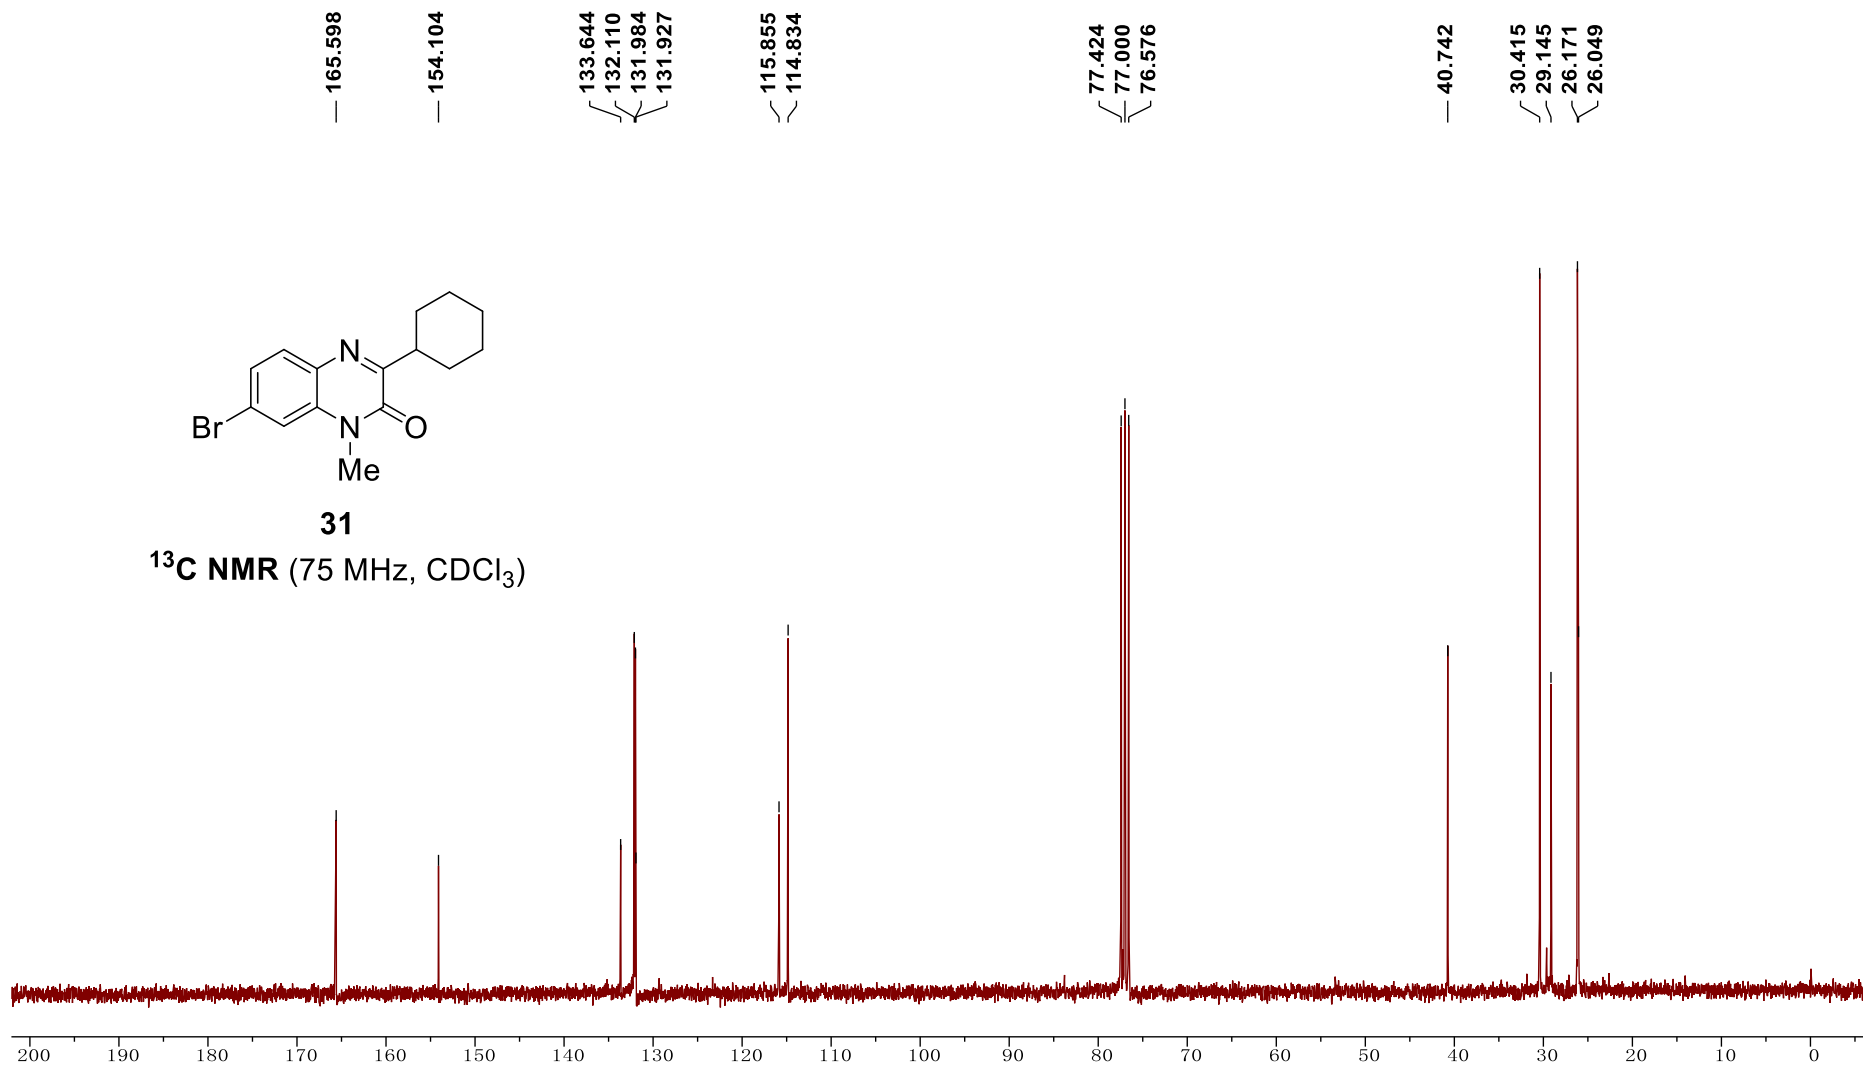

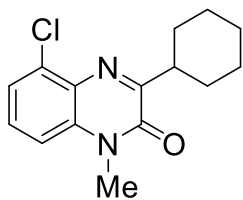

**32**

<sup>1</sup>H NMR (400 MHz, CDCl<sub>3</sub>)

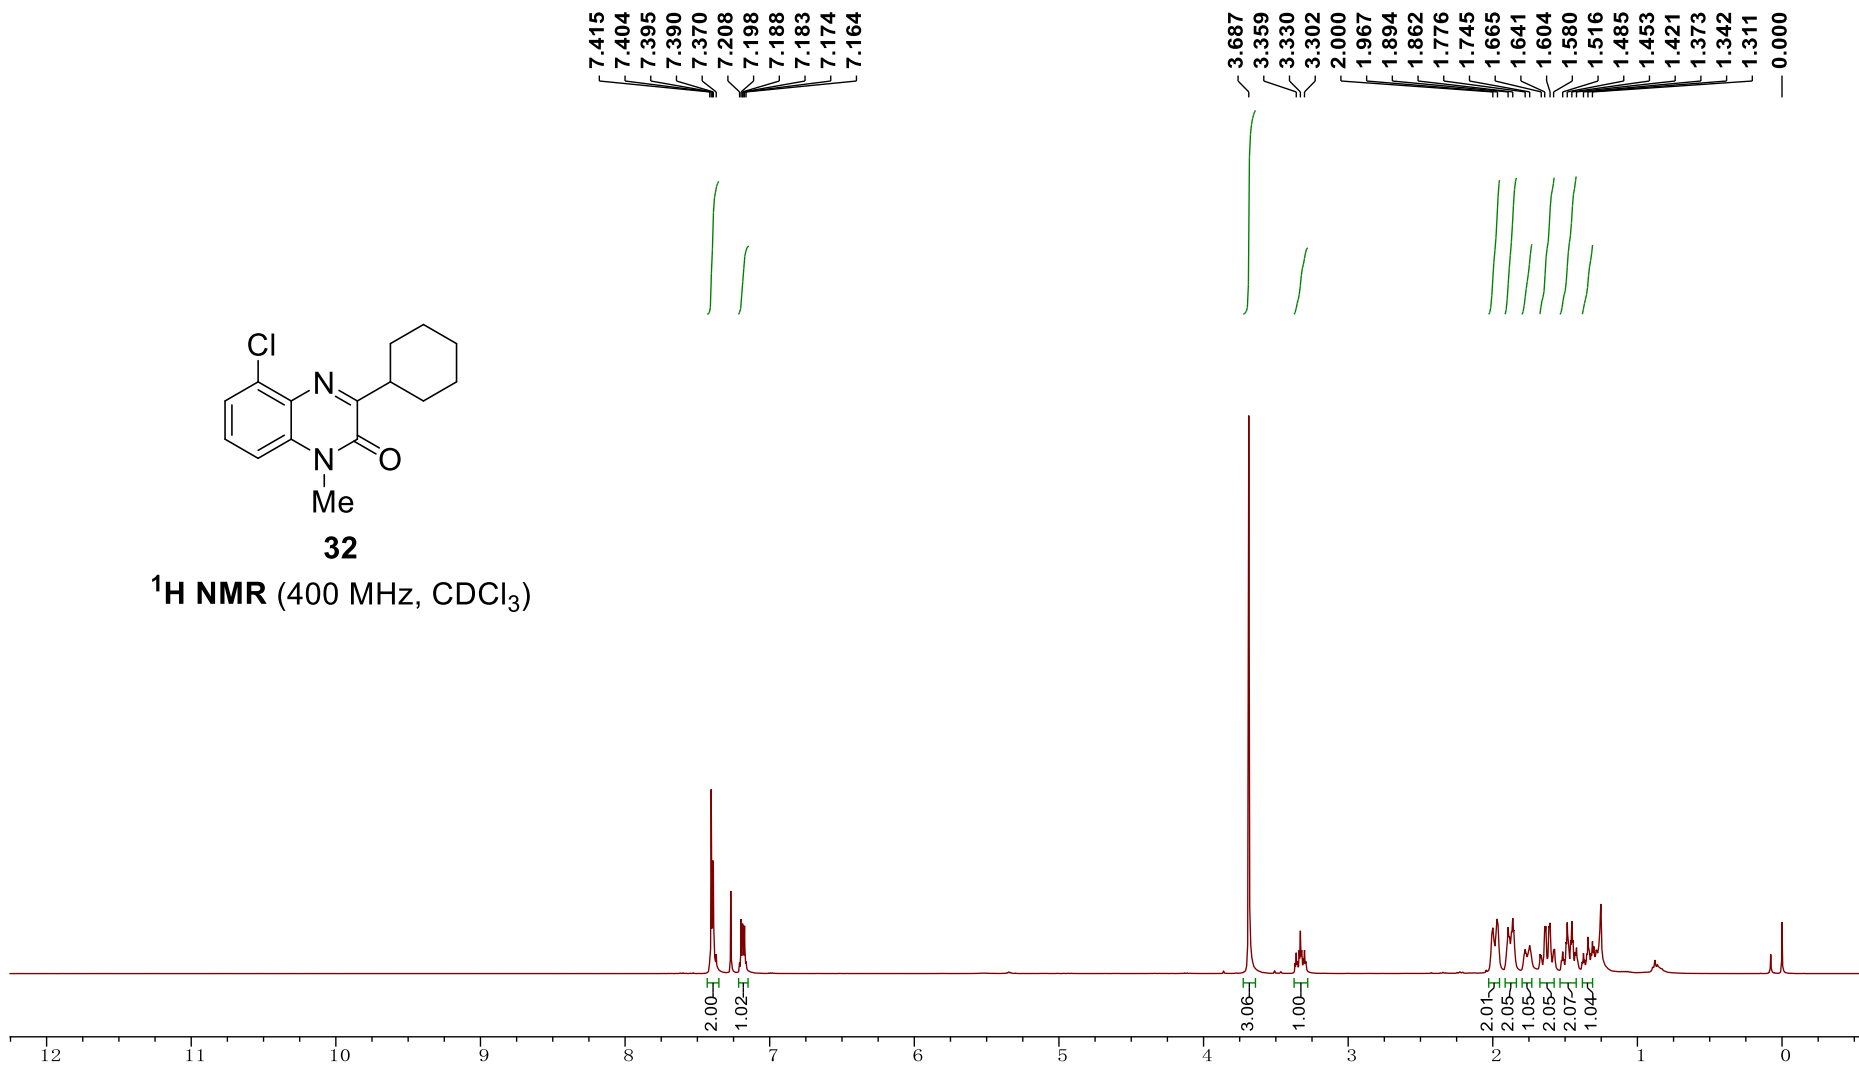

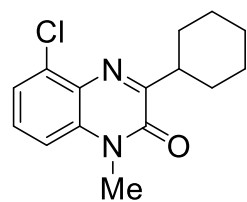

**32**

**<sup>13</sup>C NMR (101 MHz, CDCl<sub>3</sub>)**

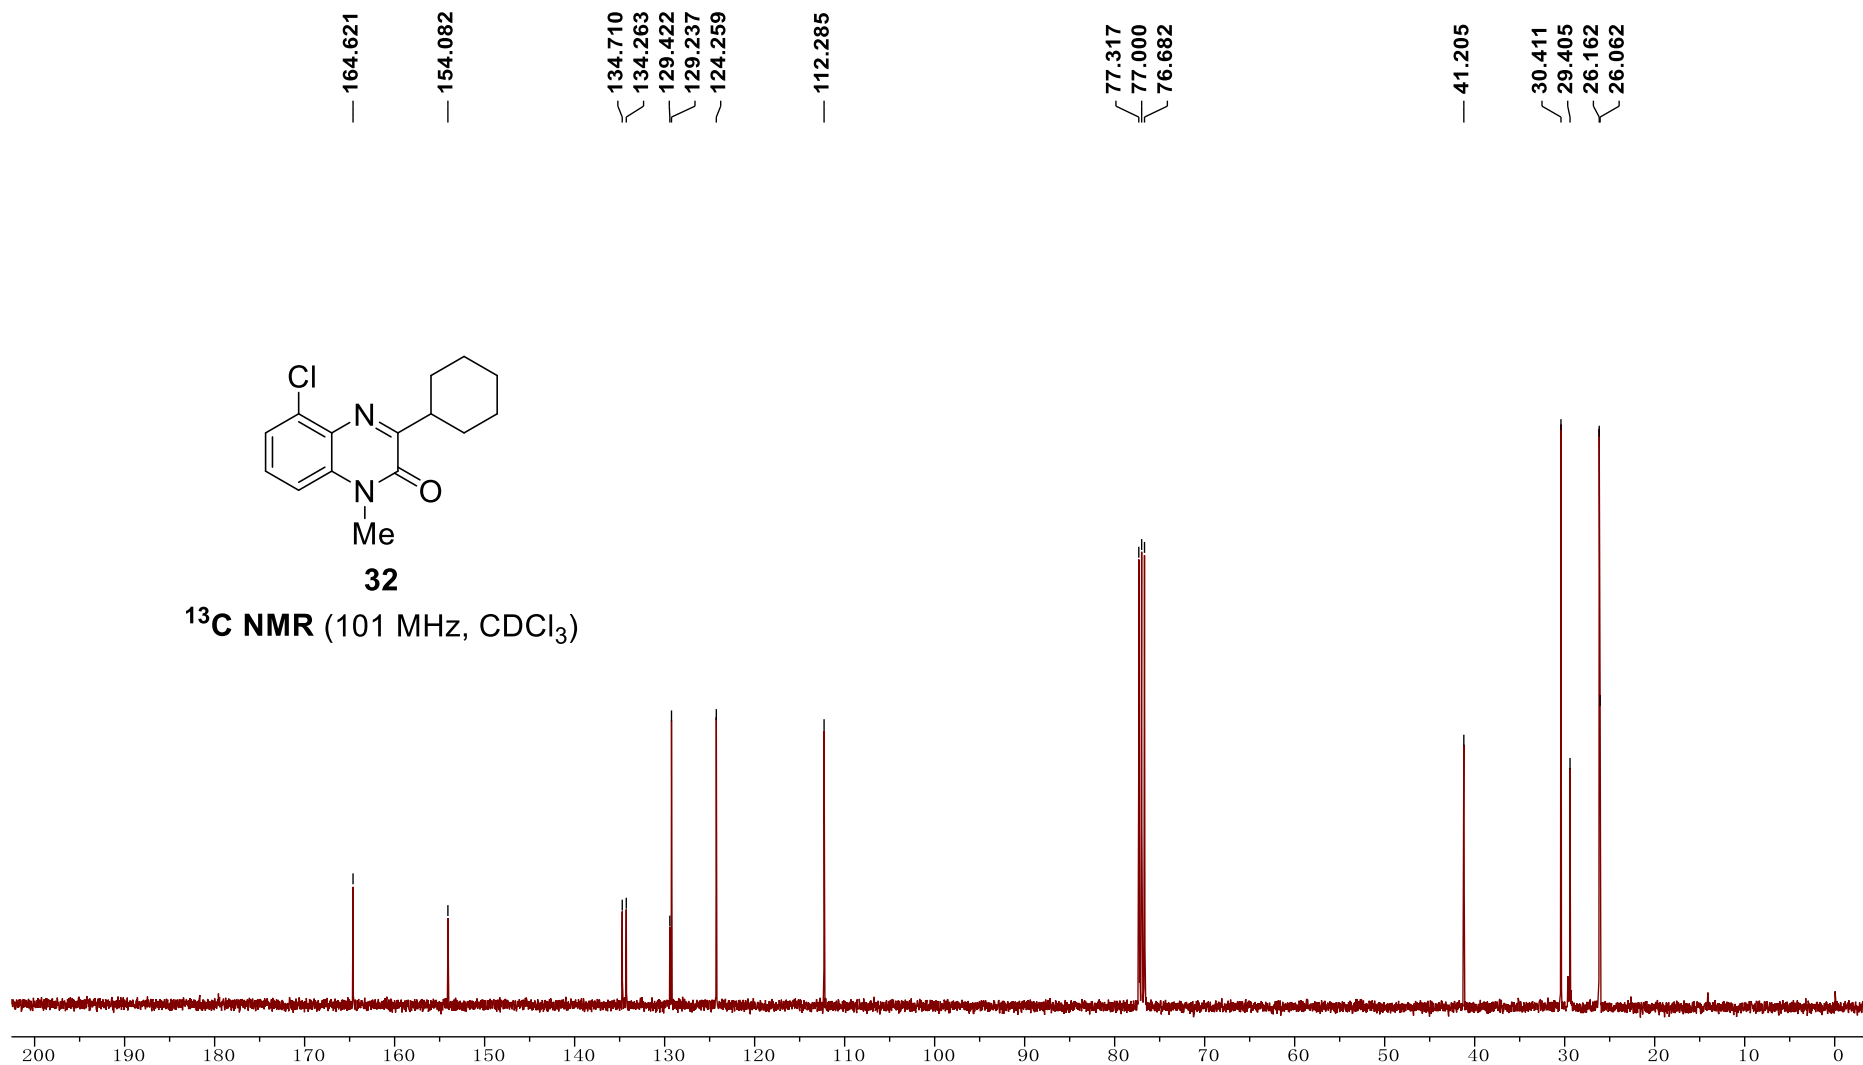



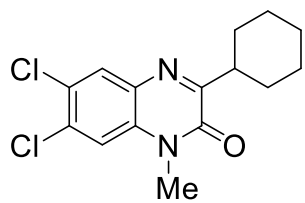

**33**

**<sup>1</sup>H NMR (400 MHz, CDCl<sub>3</sub>)**

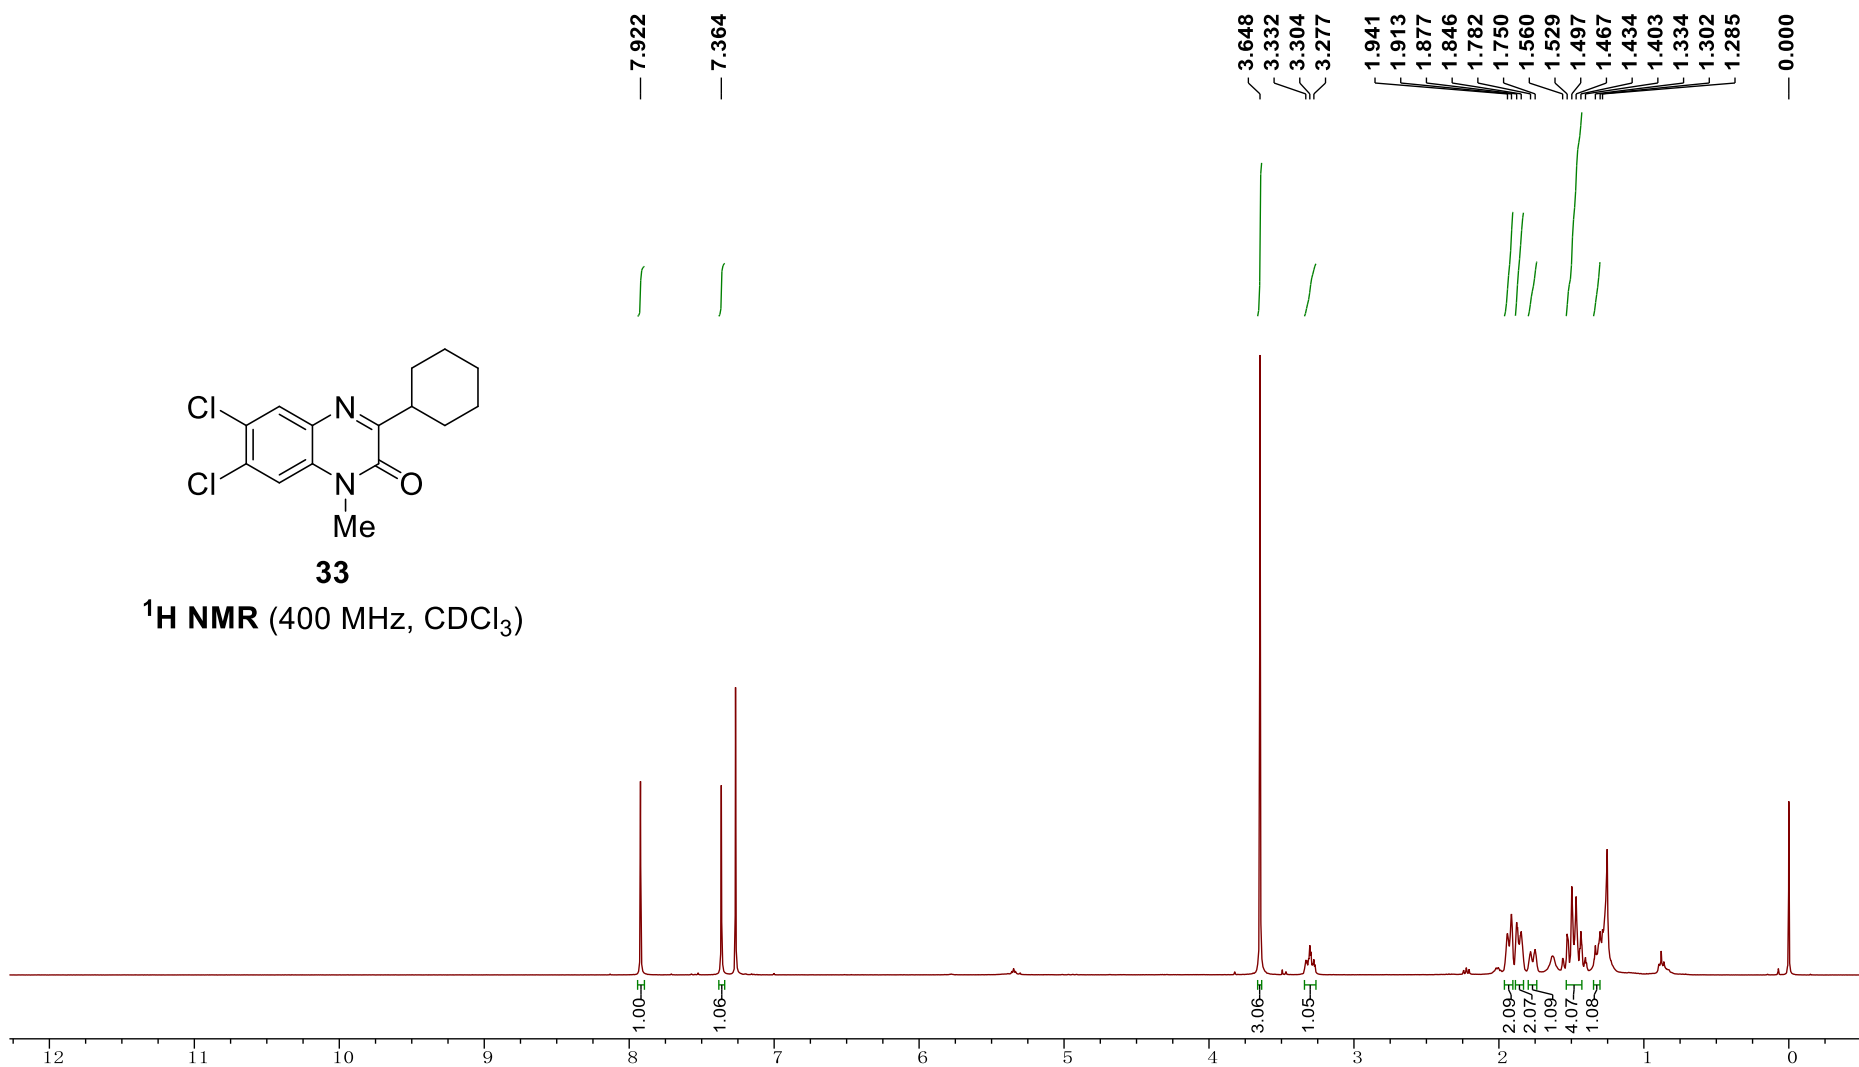

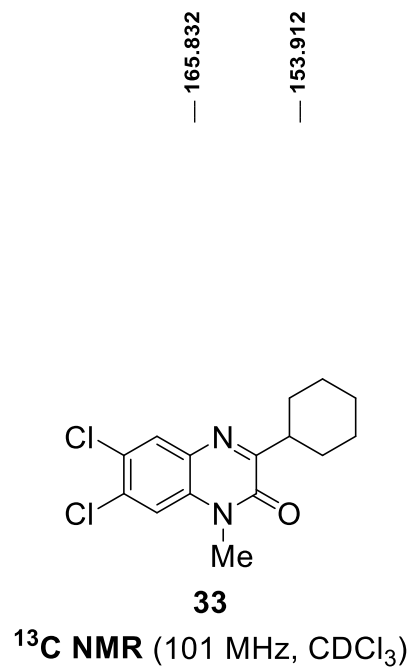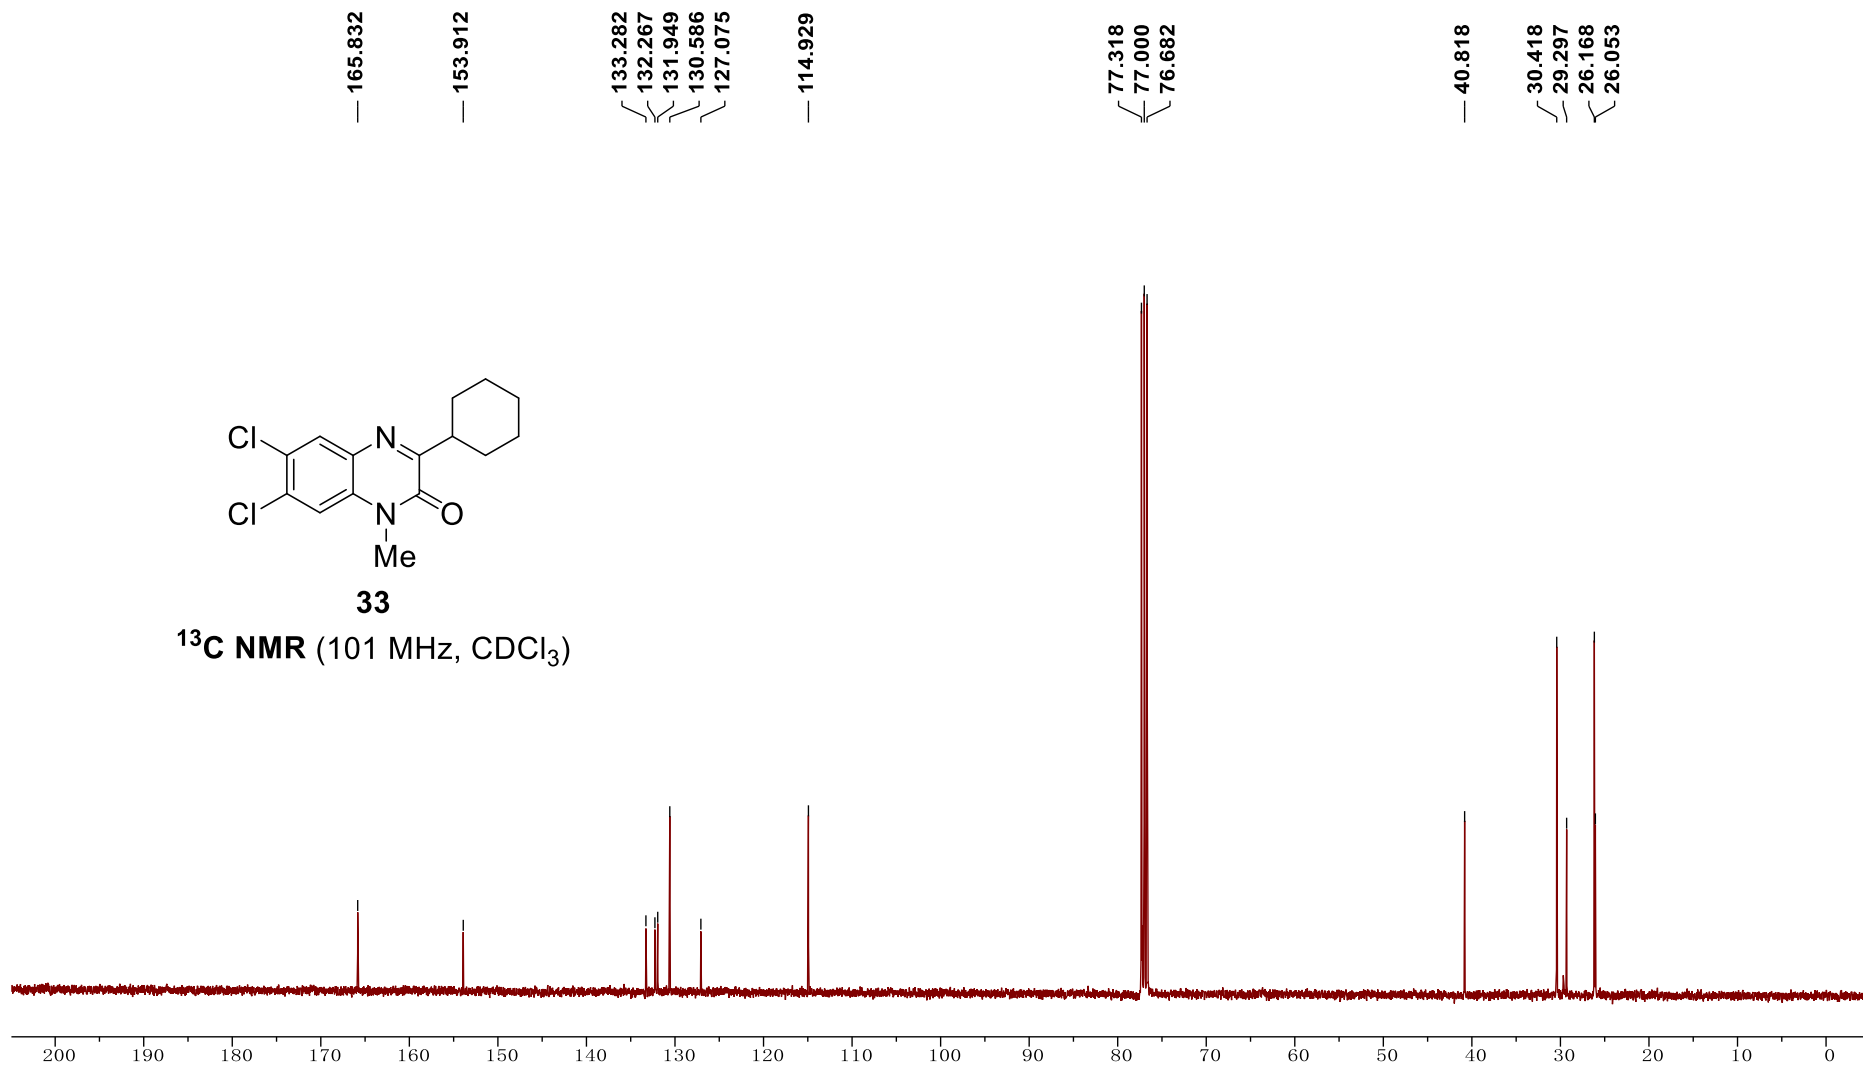

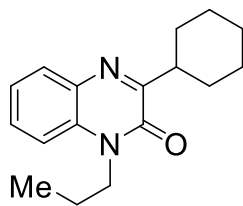

**34**

**<sup>1</sup>H NMR (400 MHz, CDCl<sub>3</sub>)**

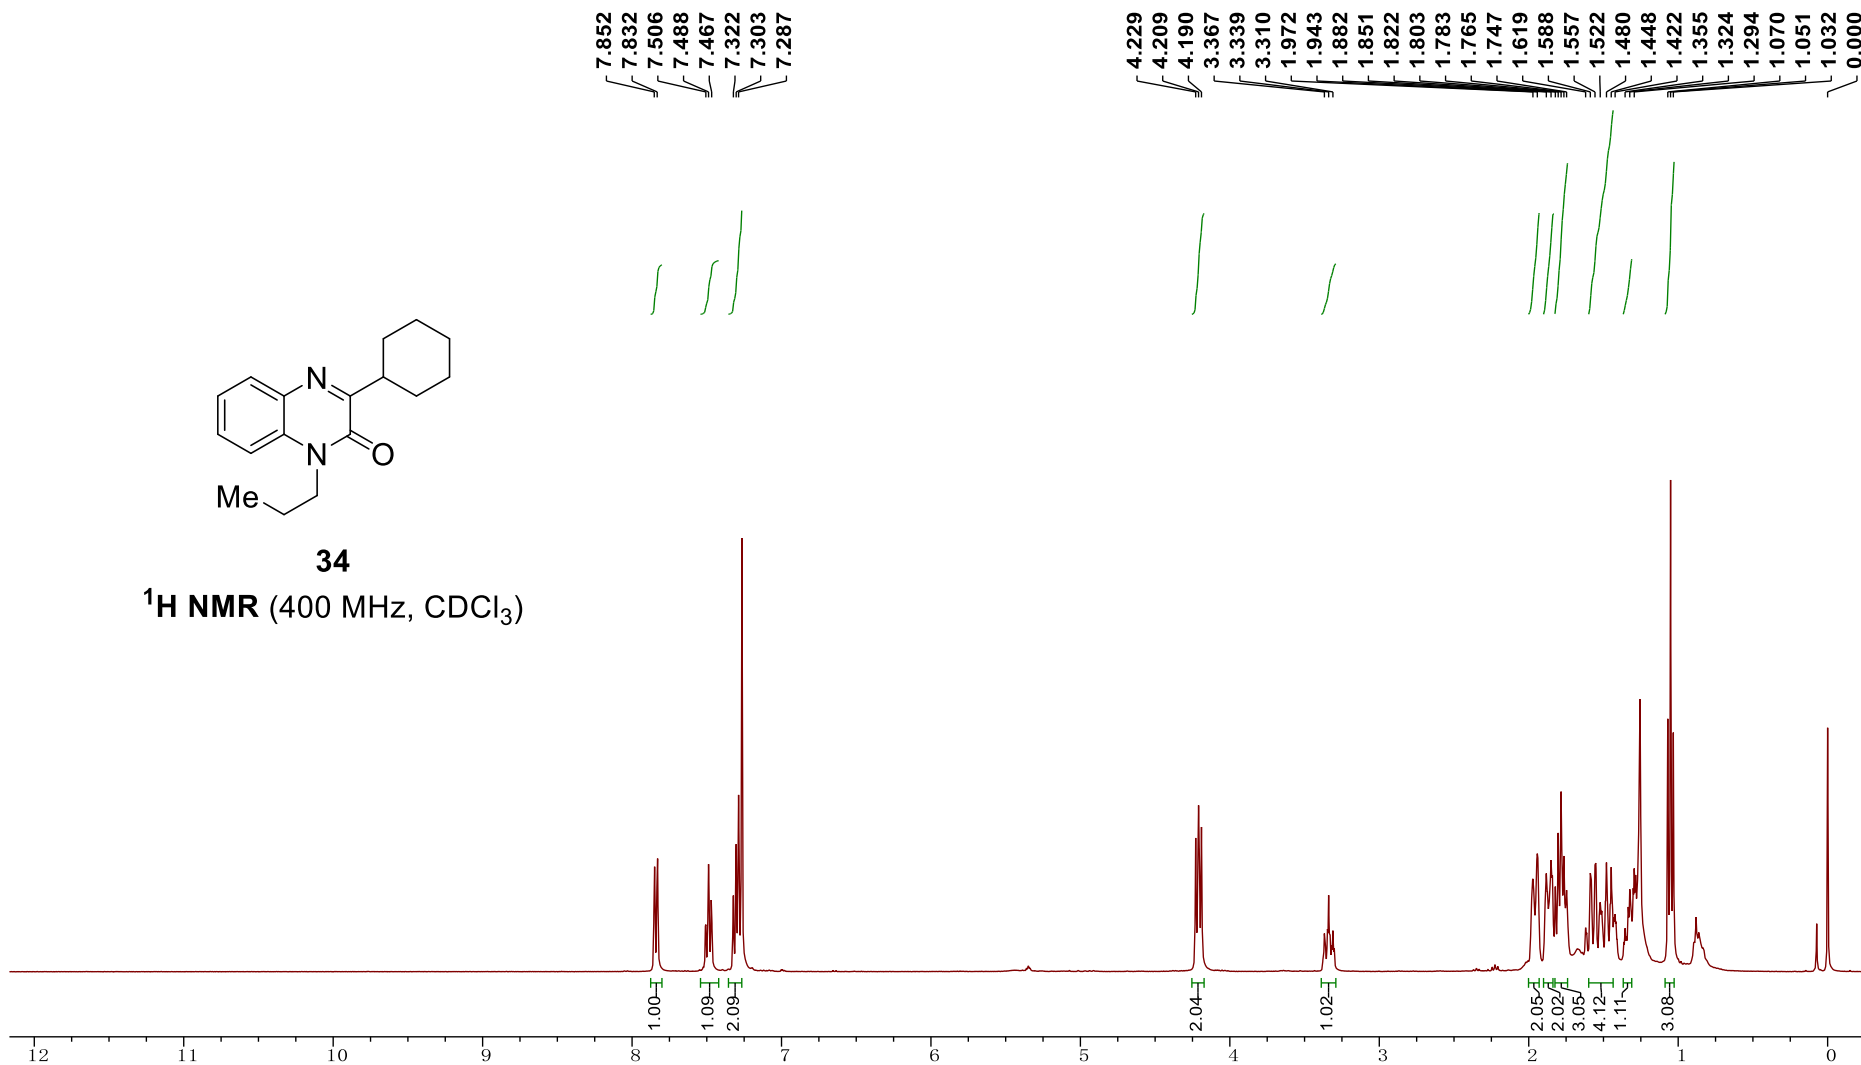

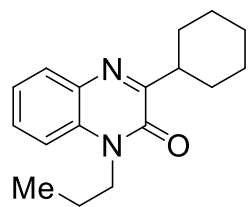

**34**

**$^{13}\text{C}$  NMR (101 MHz,  $\text{CDCl}_3$ )**

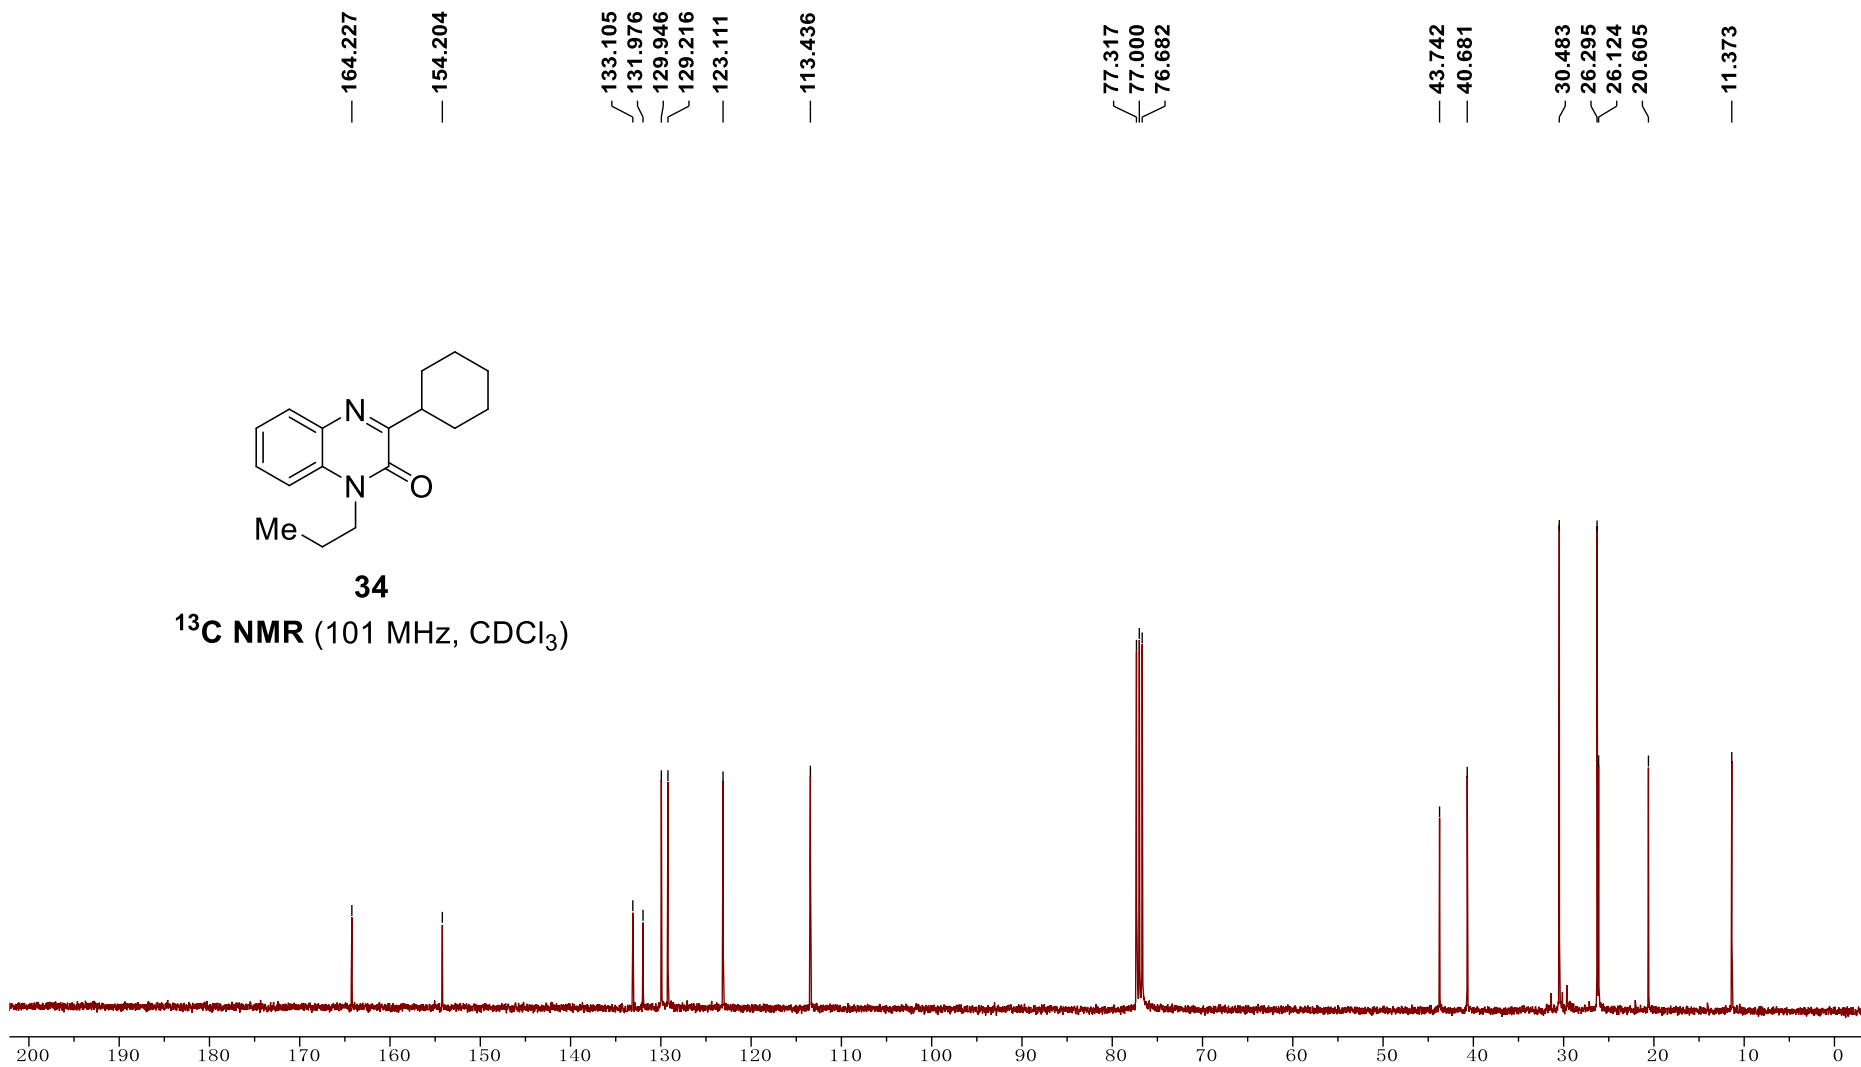

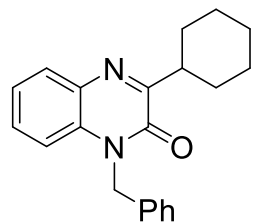

**35**

**<sup>1</sup>H NMR (300 MHz, CDCl<sub>3</sub>)**

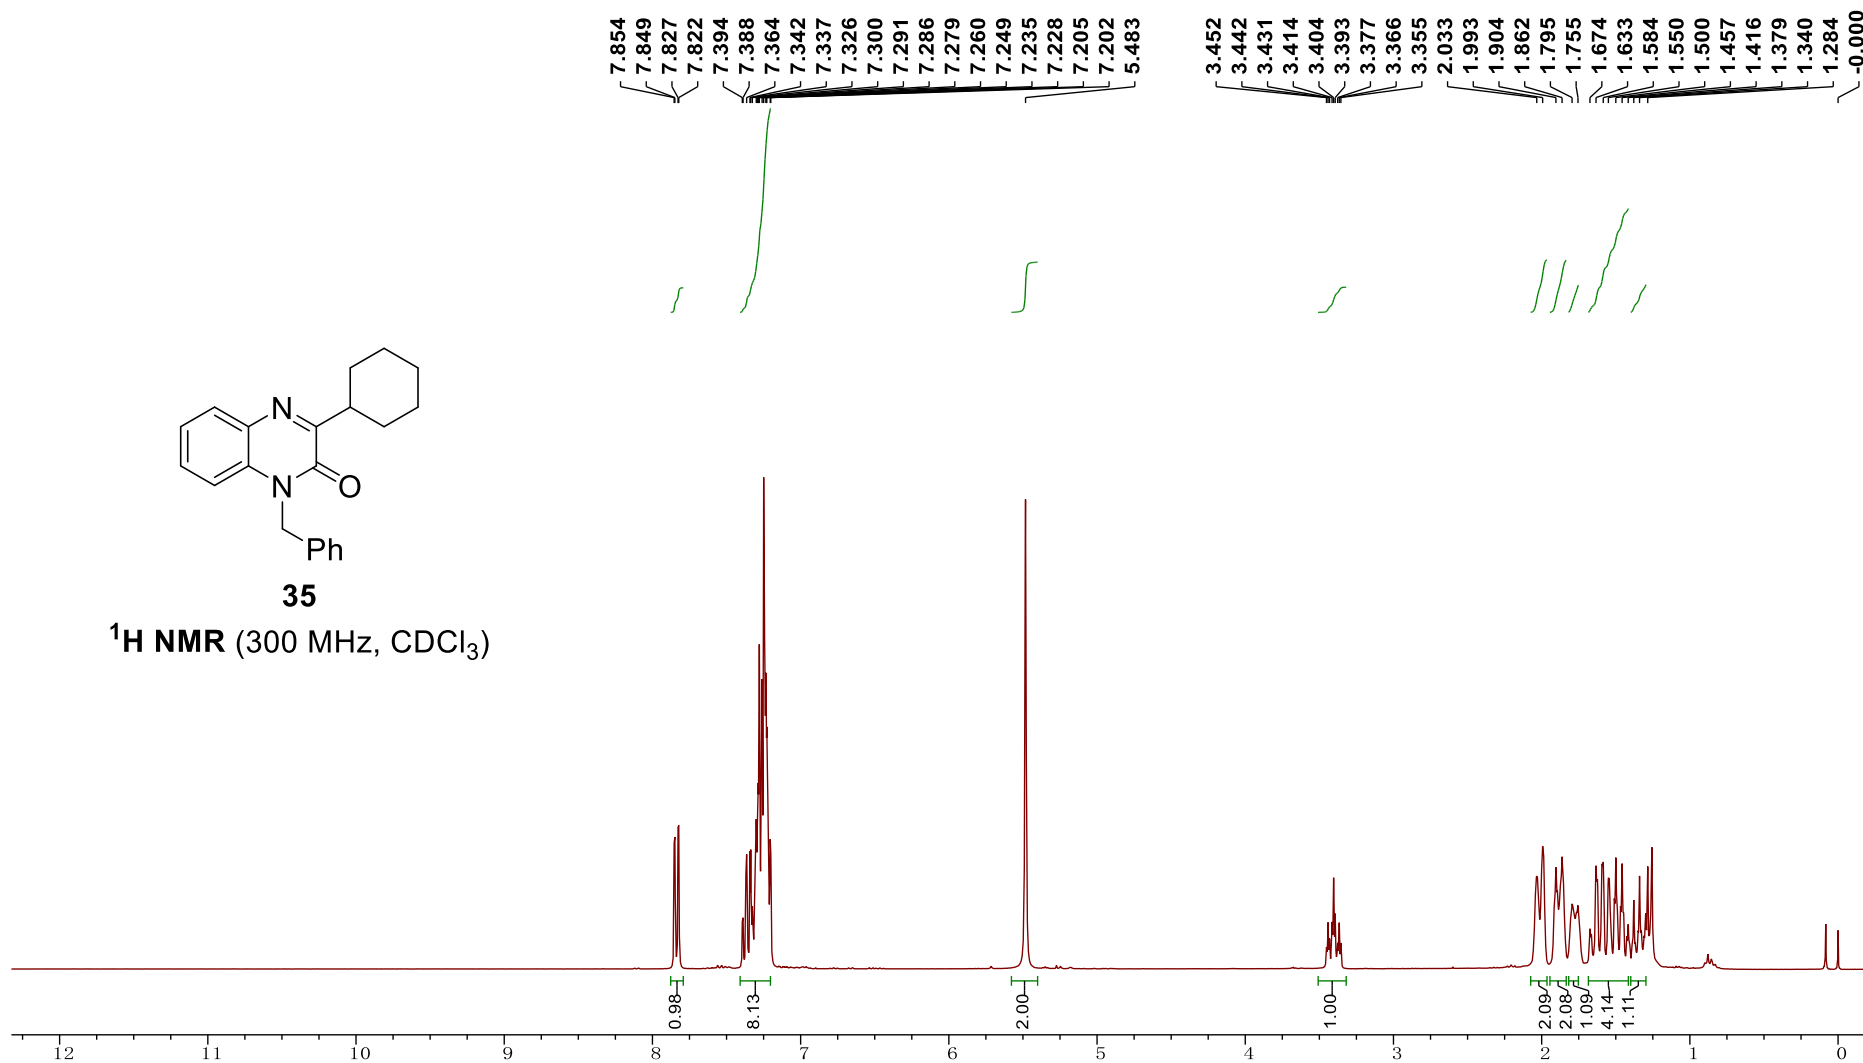

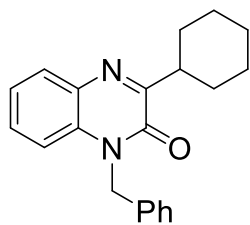

**35**

**<sup>13</sup>C NMR (75 MHz, CDCl<sub>3</sub>)**

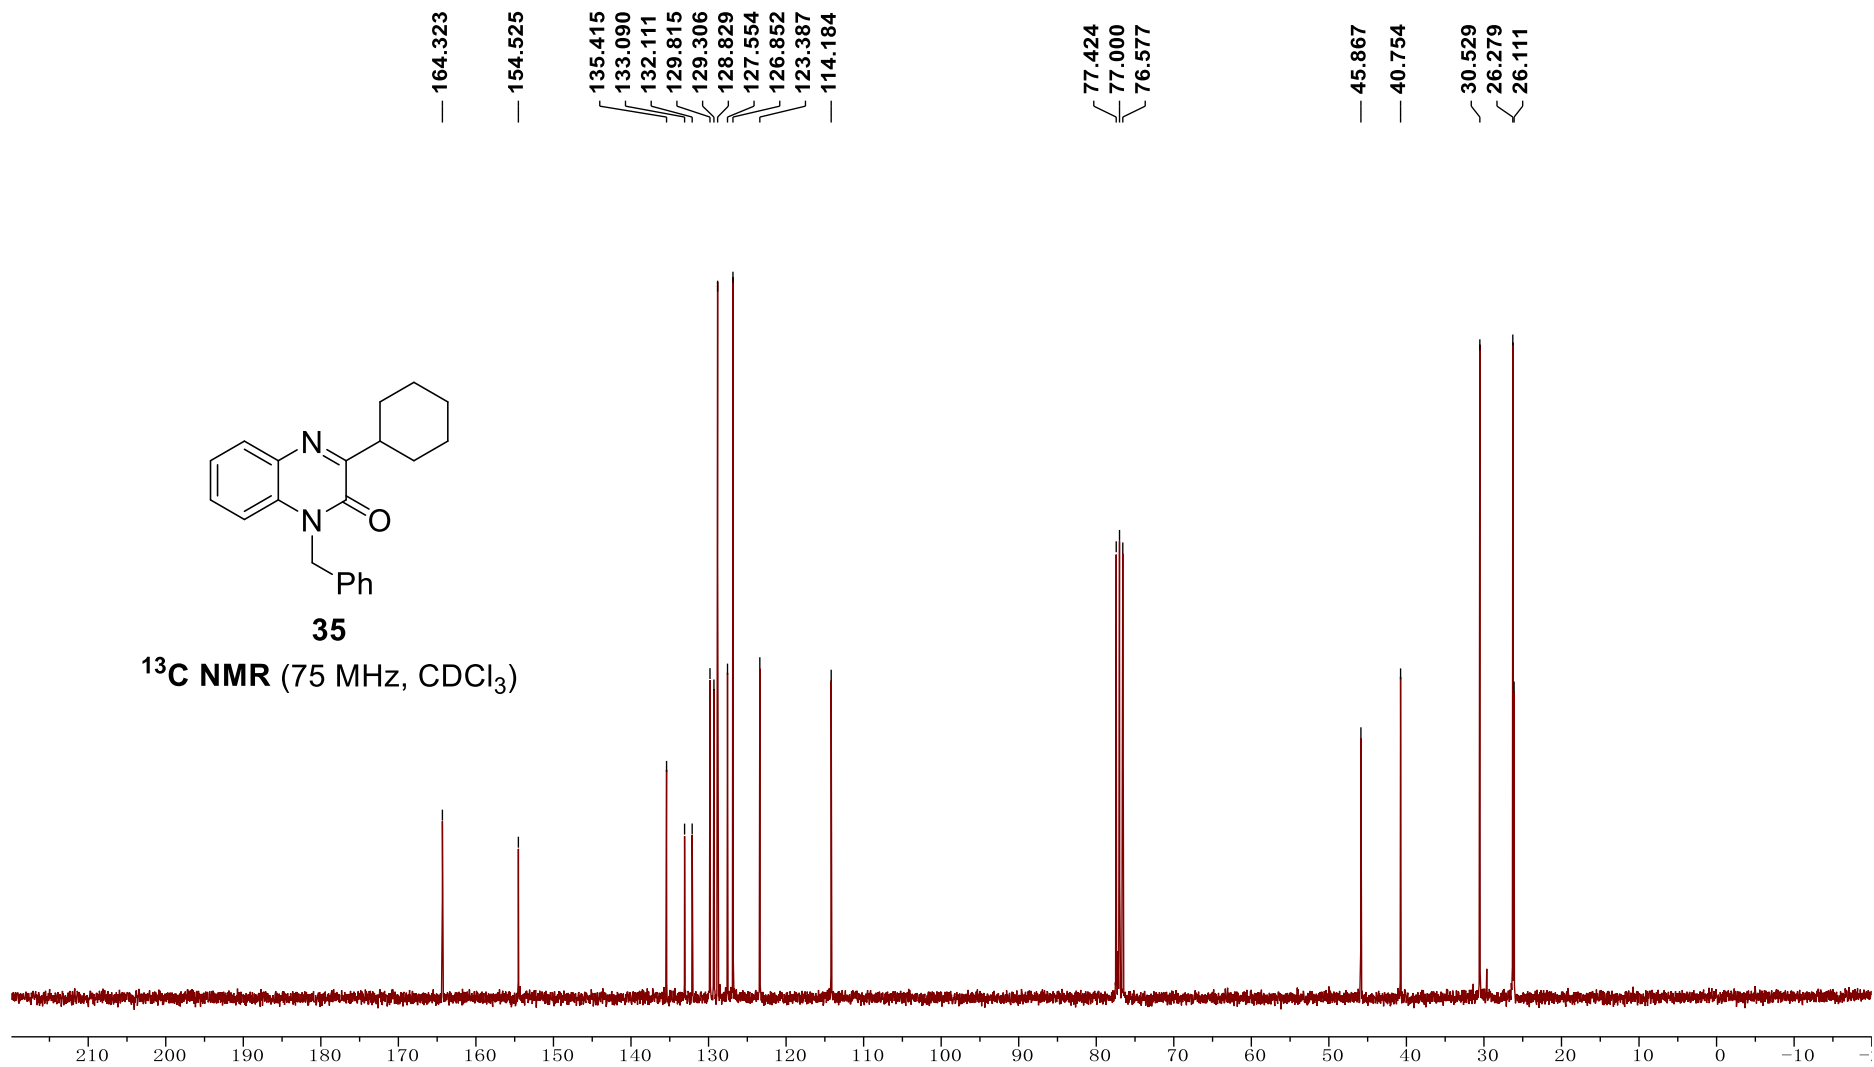

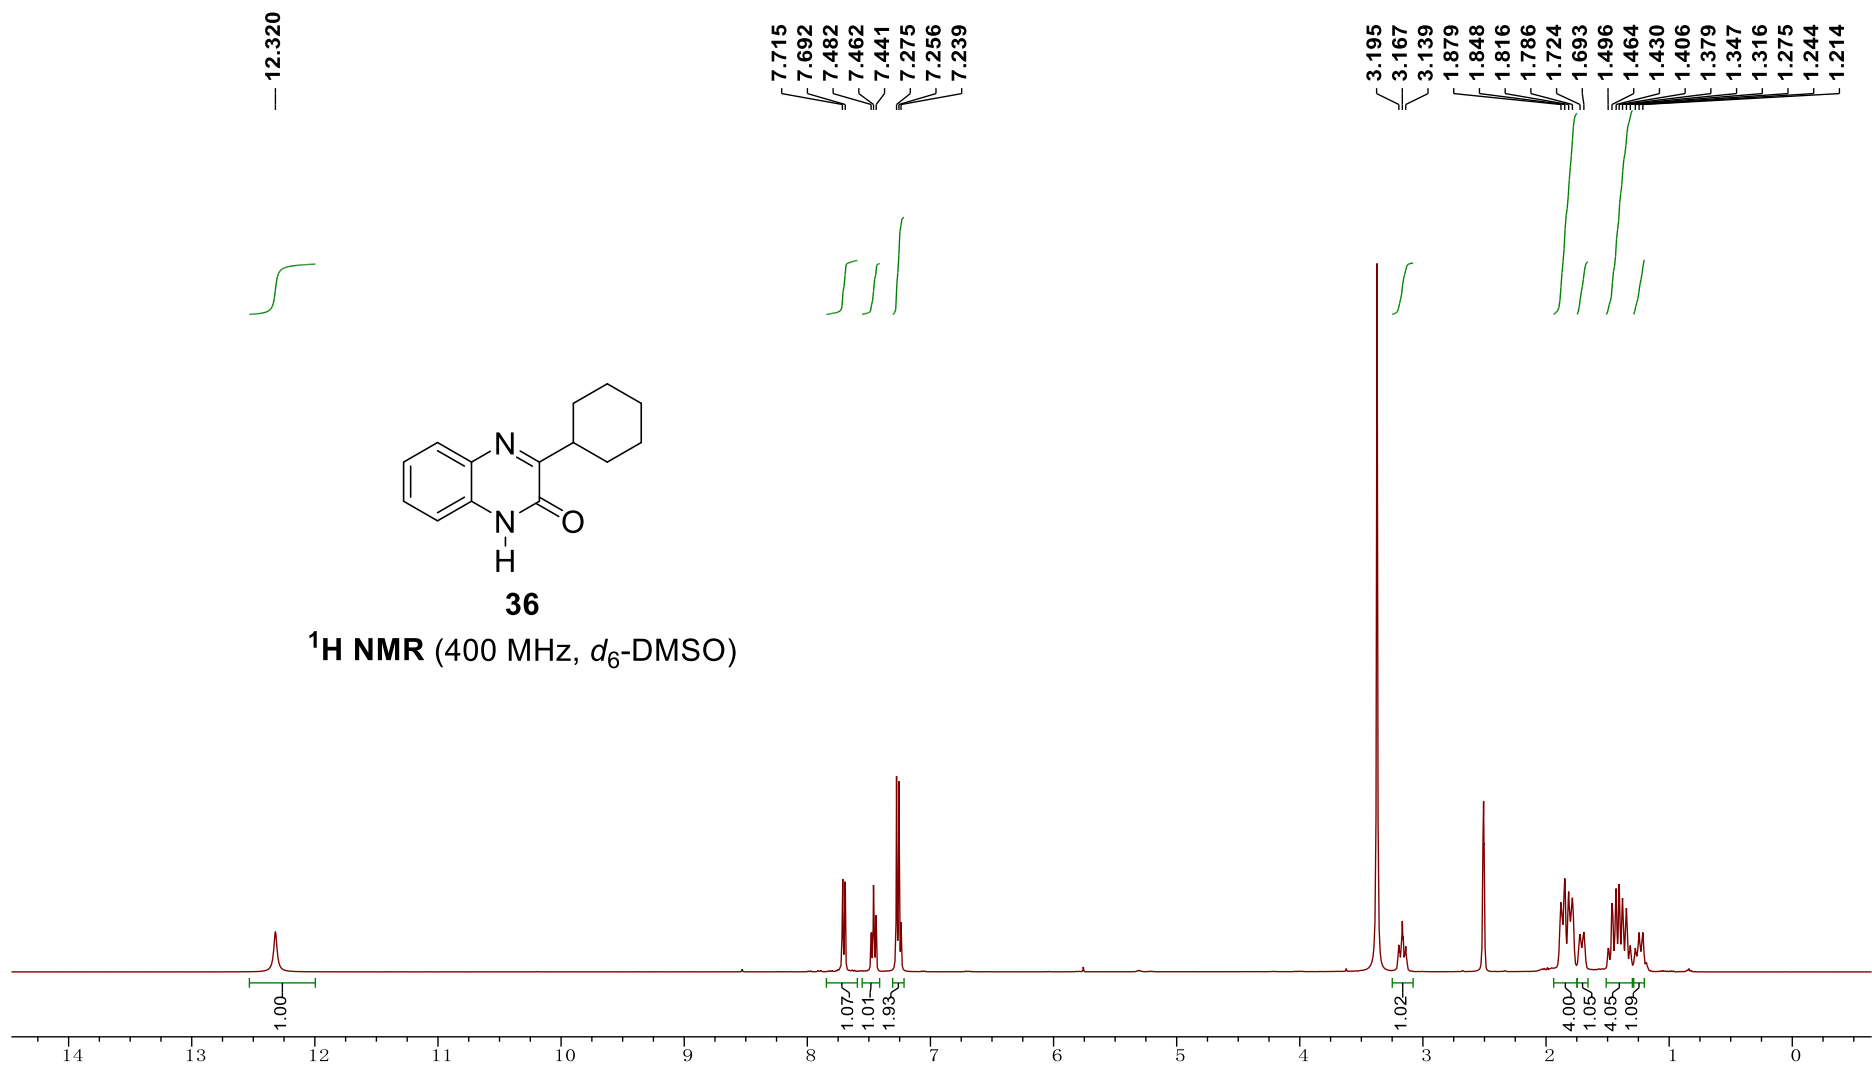

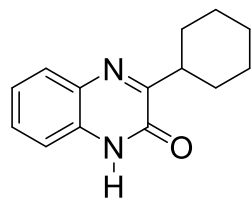

**36**

**$^{13}\text{C}$  NMR (75 MHz,  $d_6$ -DMSO)**

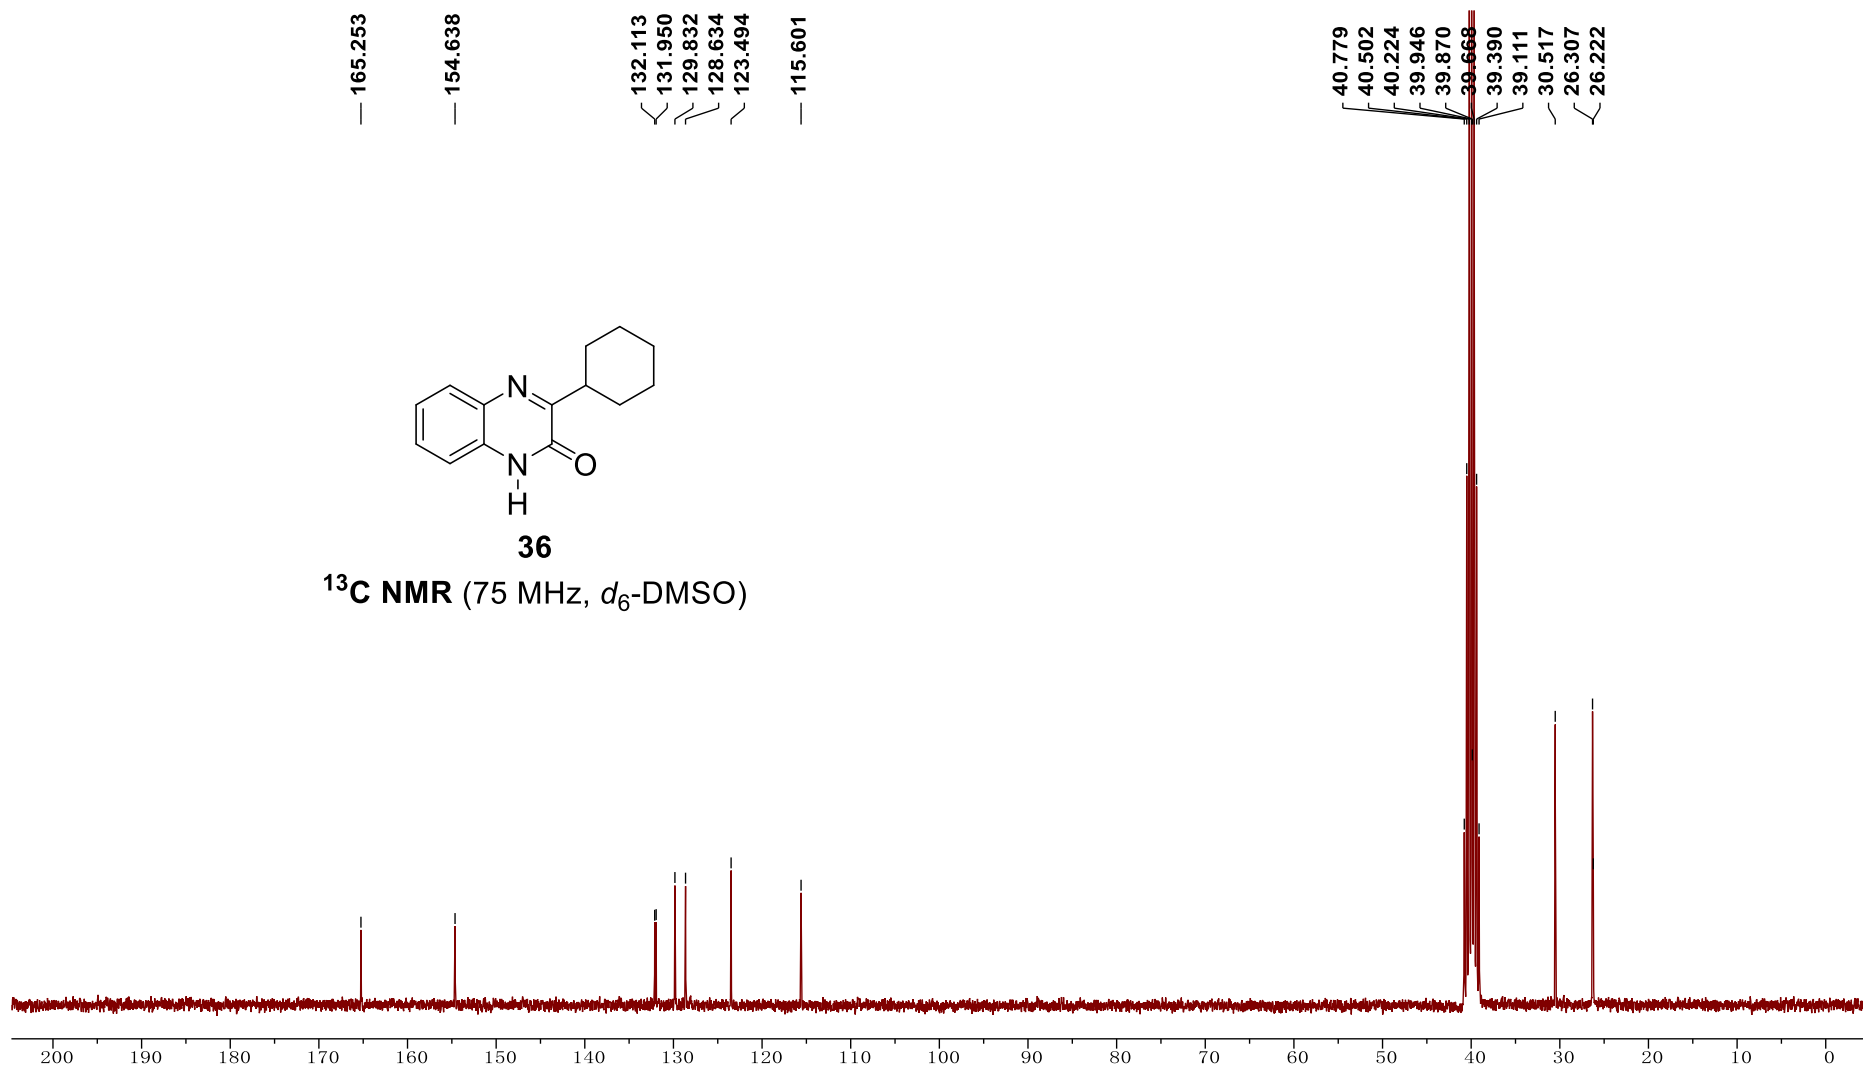



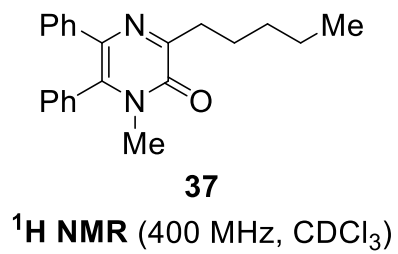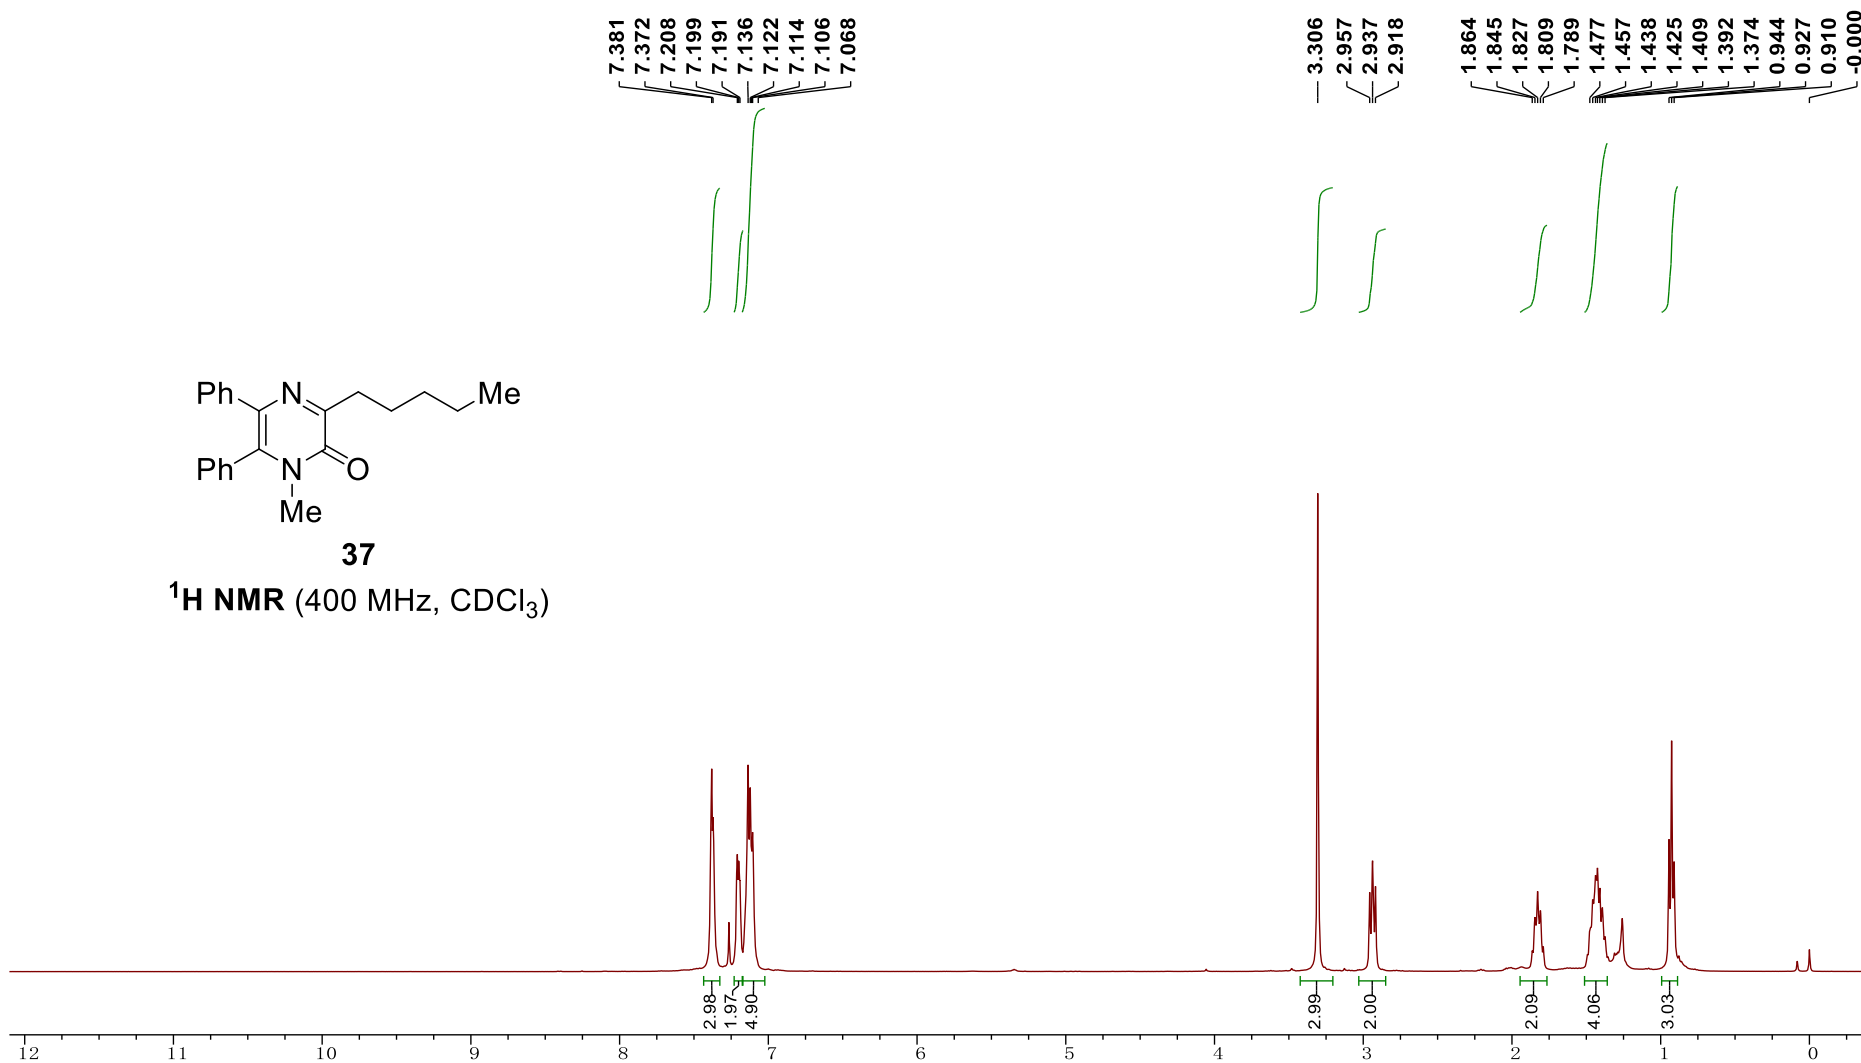

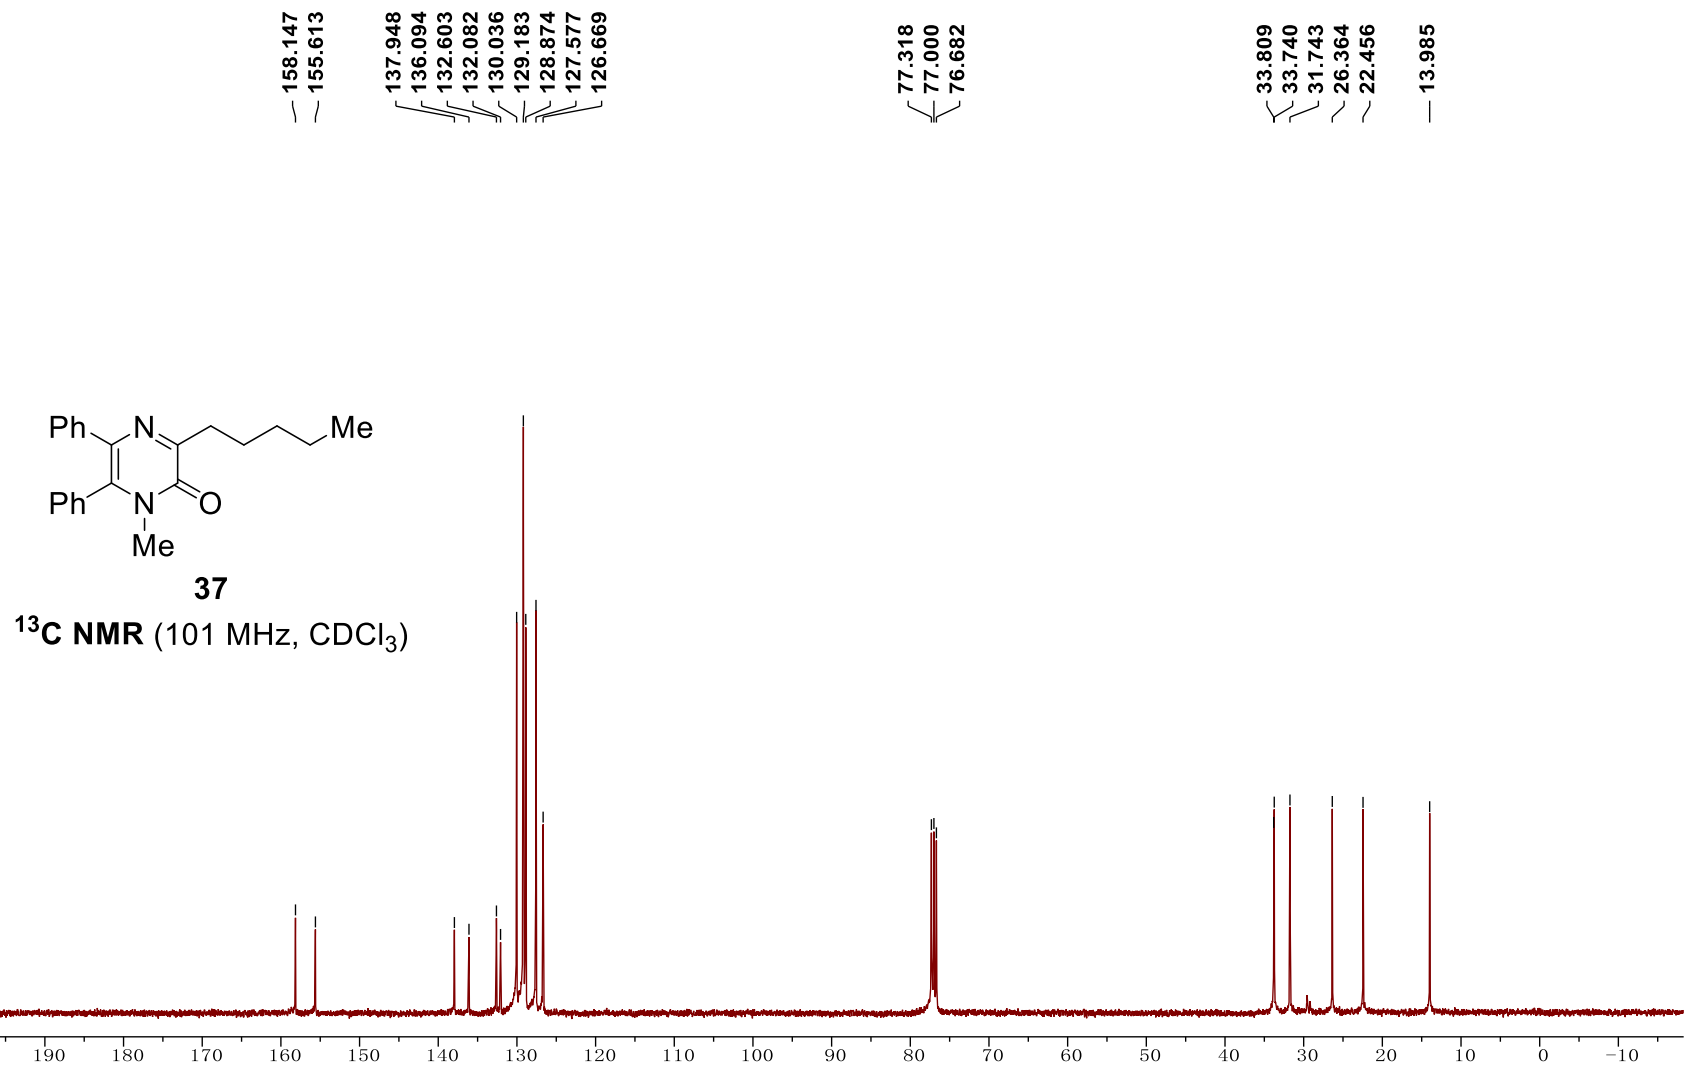

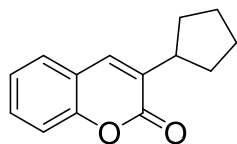

**38**

<sup>1</sup>H NMR (400 MHz, CDCl<sub>3</sub>)

7.492  
7.471  
7.468  
7.448  
7.429  
7.313  
7.292  
7.263  
7.244  
7.226

3.188  
3.167  
3.146  
3.125  
3.105  
2.130  
2.113  
2.103  
2.086  
2.075  
2.059  
1.824  
1.803  
1.787  
1.756  
1.733  
1.724  
1.716  
1.705  
1.697  
1.667  
1.630  
1.597  
1.582  
1.561  
1.542  
-0.000

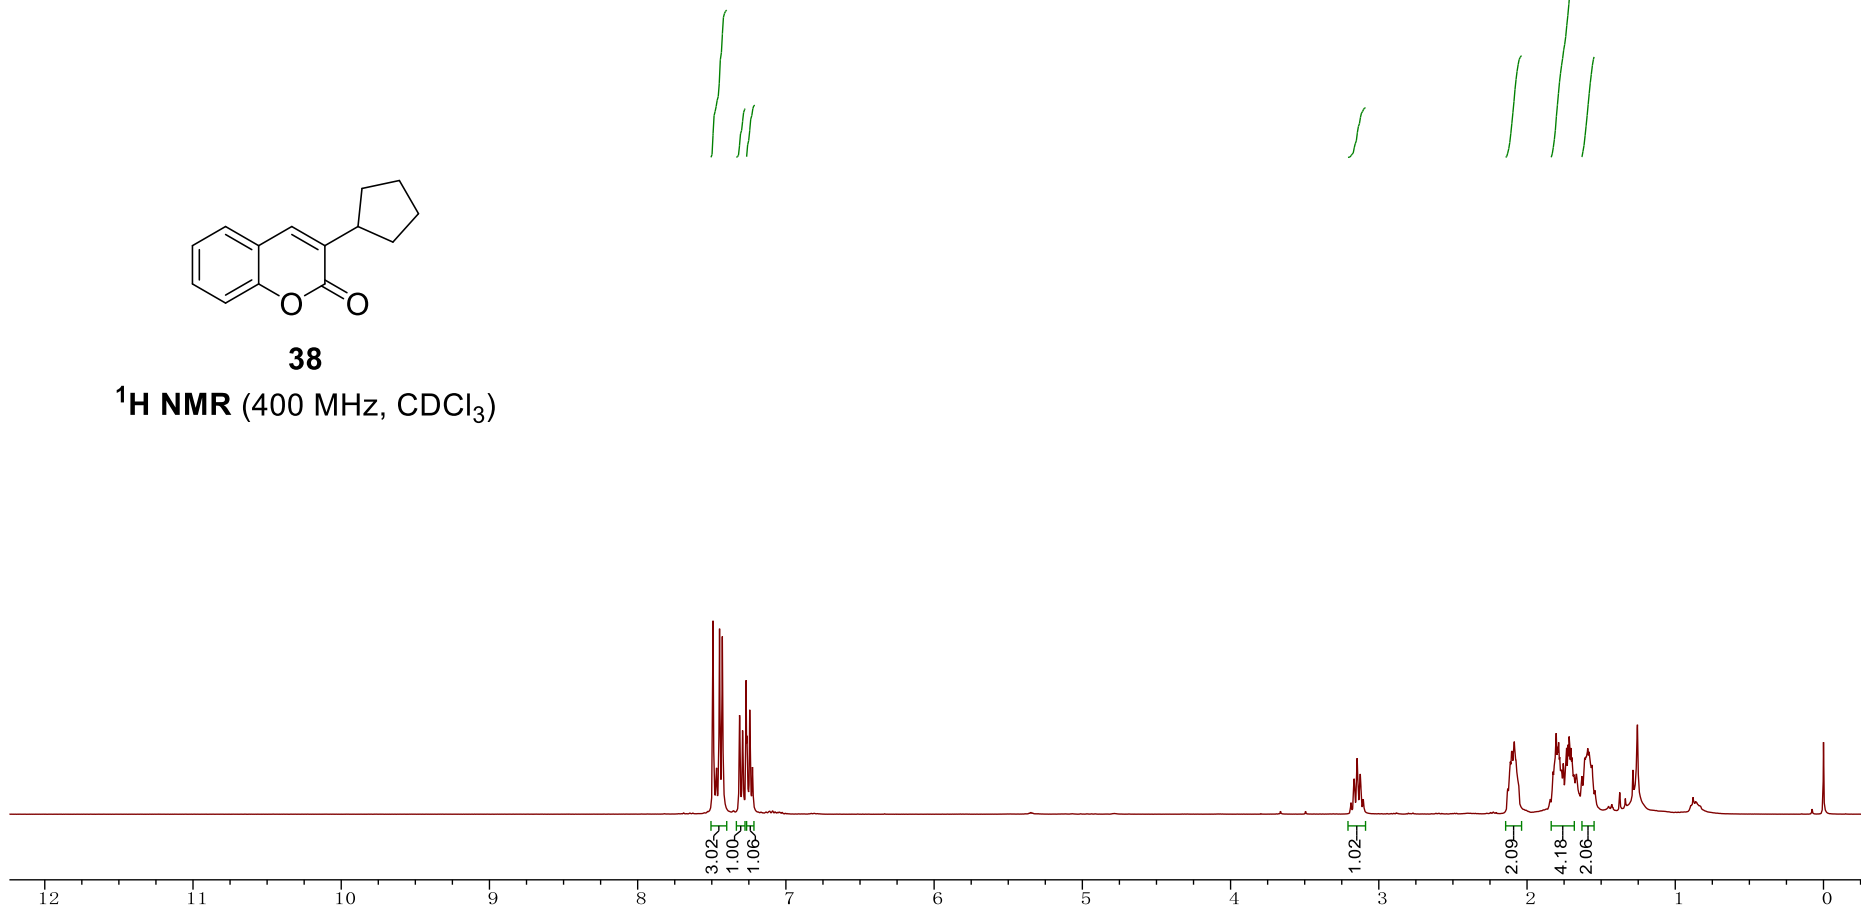

O=C1C=C(C2CCCC2)c3ccccc1O3  
**38**  
<sup>13</sup>C NMR (101 MHz, CDCl<sub>3</sub>)

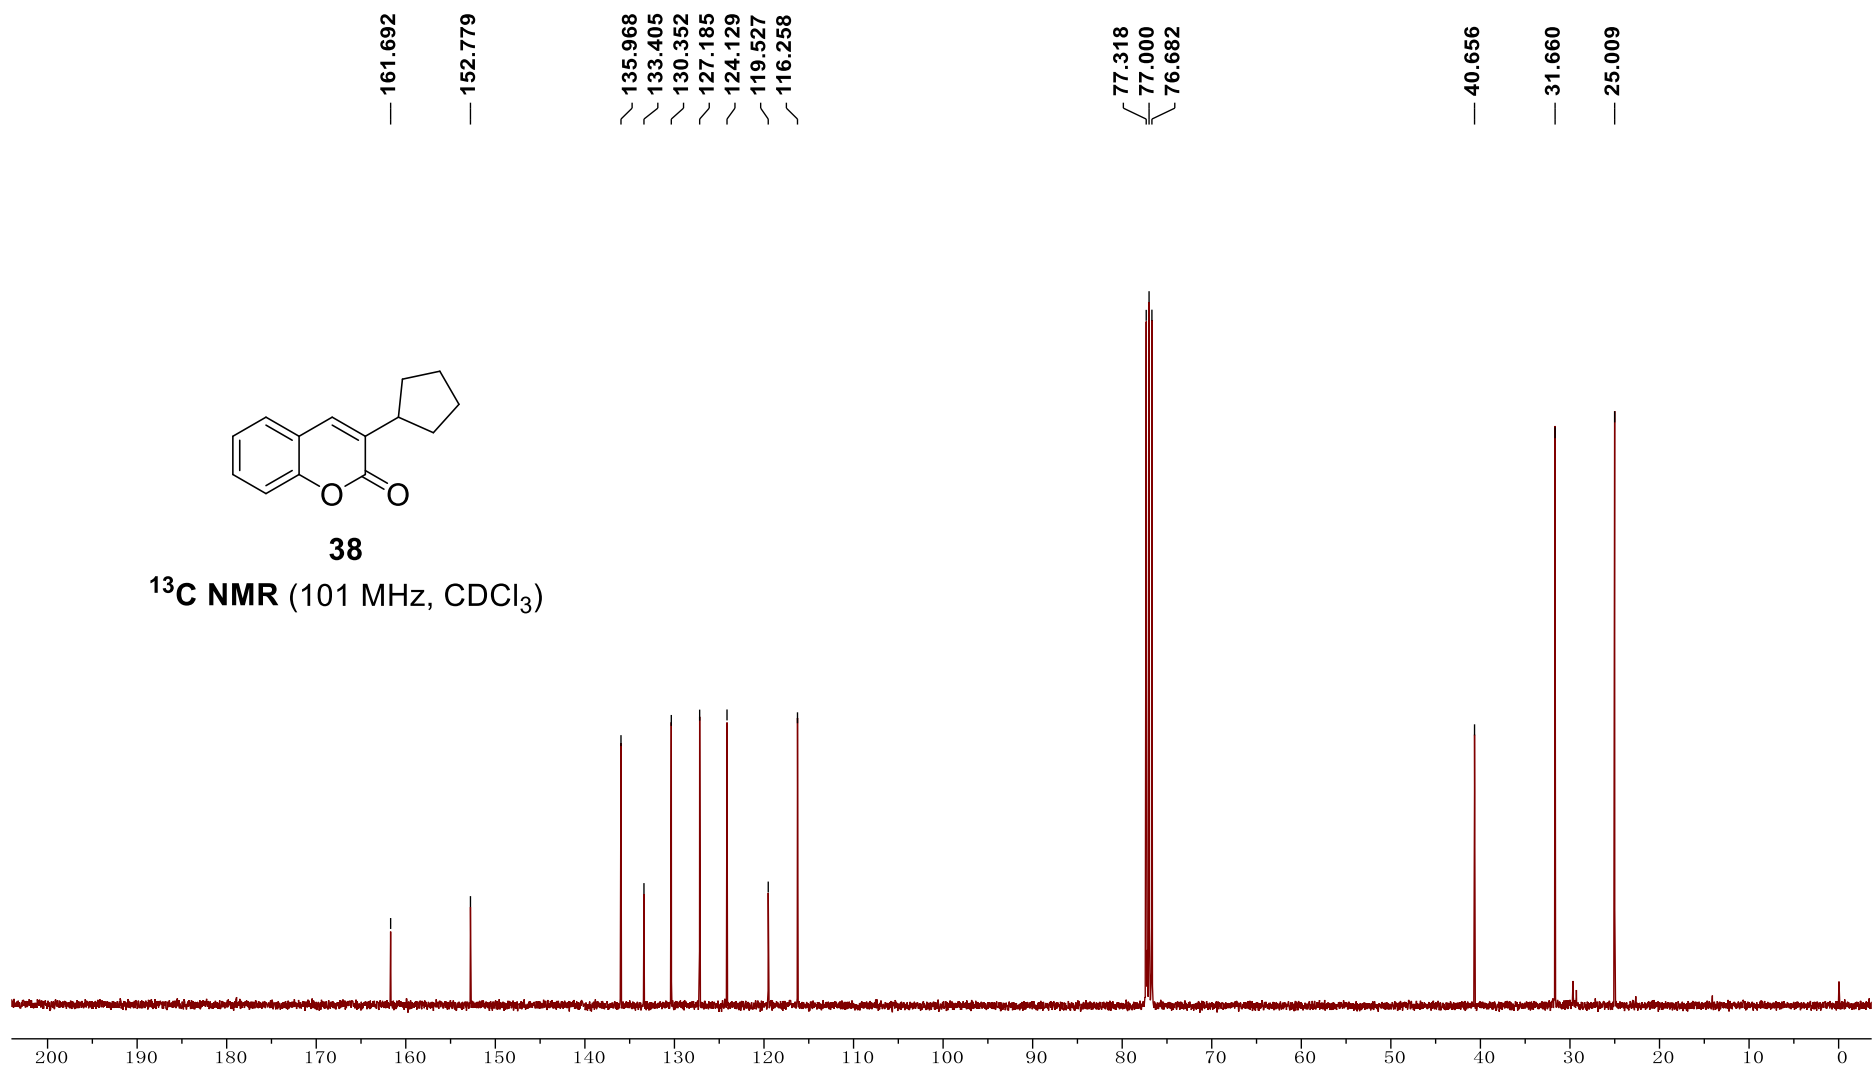

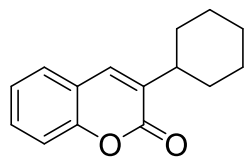

**39**

**<sup>1</sup>H NMR (400 MHz, CDCl<sub>3</sub>)**

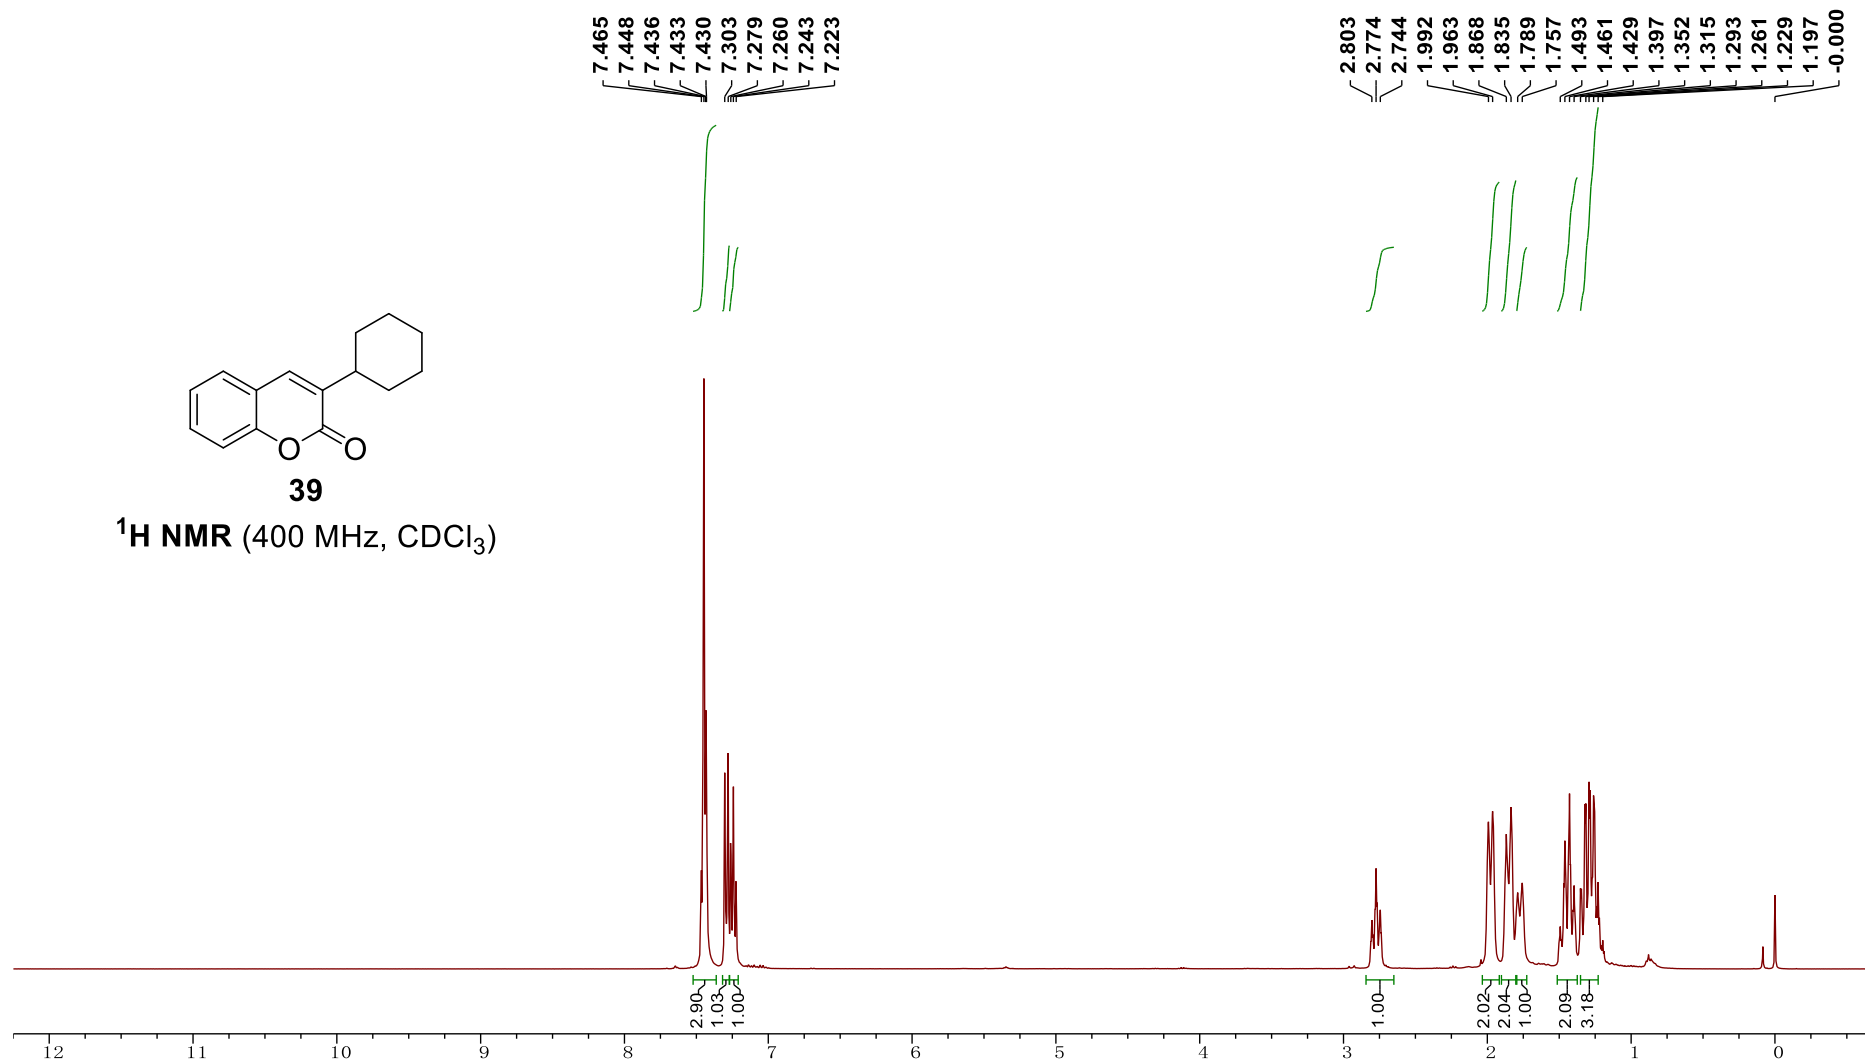

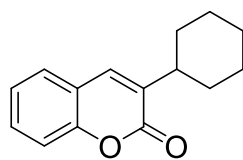

**39**

**$^{13}\text{C}$  NMR (75 MHz,  $\text{CDCl}_3$ )**

— 161.469

— 152.593

— 136.258

— 134.737

— 130.327

— 127.225

— 124.077

— 119.566

— 116.158

— 77.424

— 77.000

— 76.576

— 38.084

— 32.001

— 26.406

— 26.058

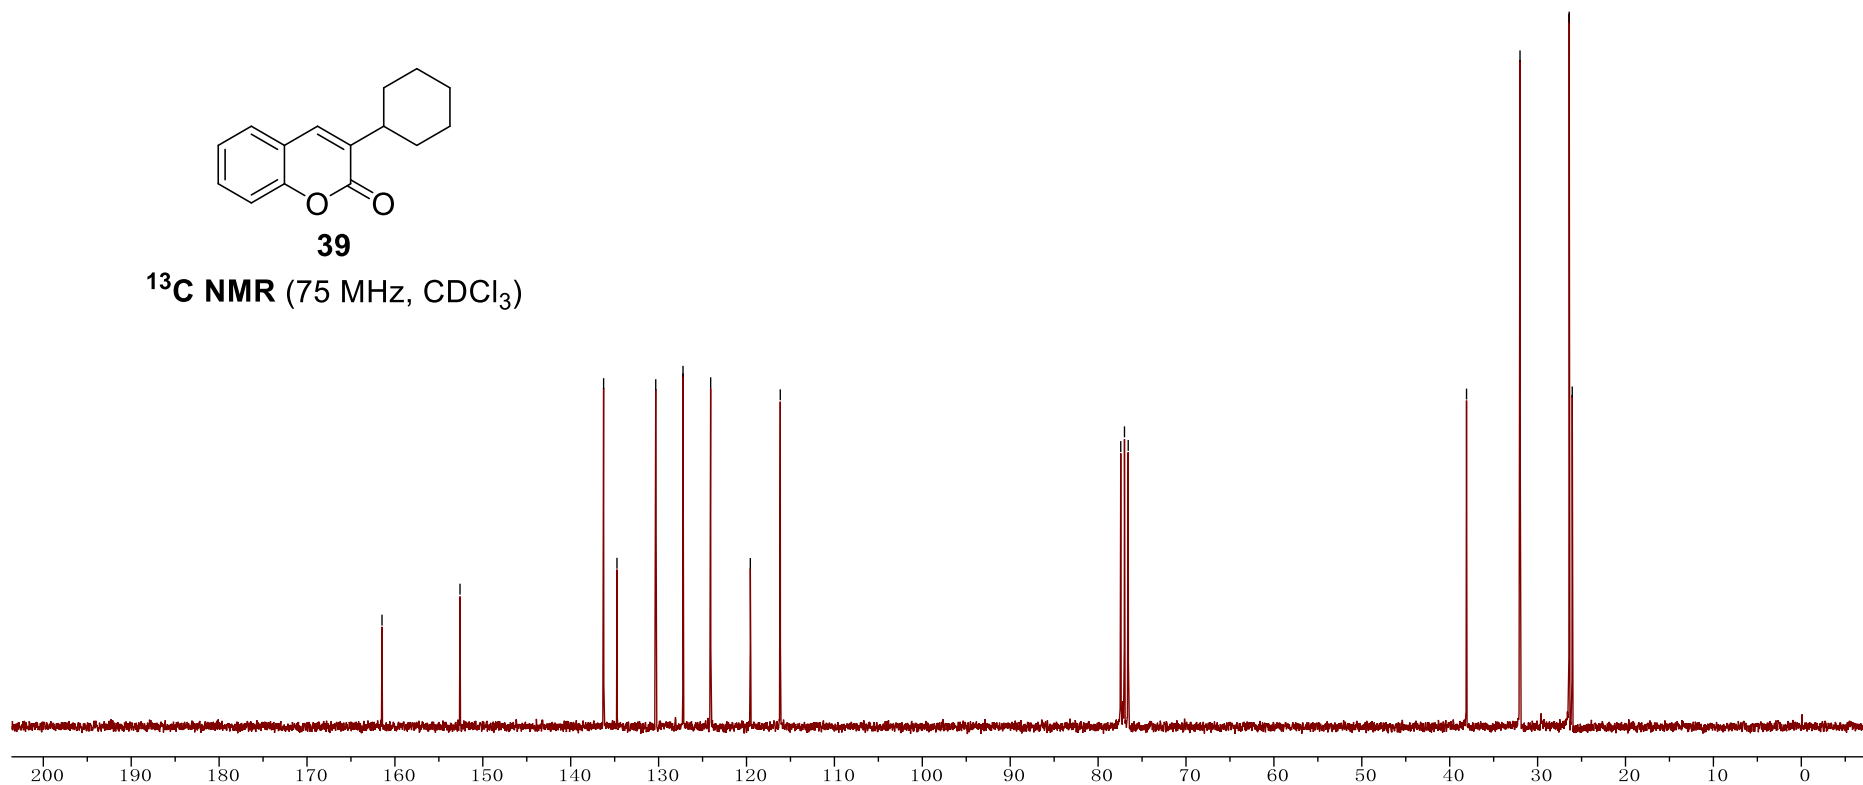

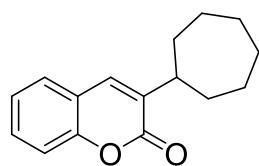

**40**

**<sup>1</sup>H NMR (400 MHz, CDCl<sub>3</sub>)**

7.465  
7.449  
7.436  
7.430  
7.426  
7.418  
7.289  
7.268  
7.254  
7.234  
7.217

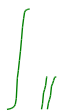

2.934  
1.972  
1.947  
1.932  
1.922  
1.820  
1.803  
1.789  
1.771  
1.708  
1.693  
1.622  
1.596  
1.578  
1.572  
0.000

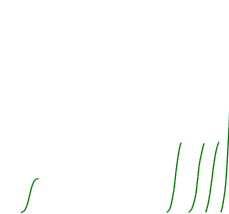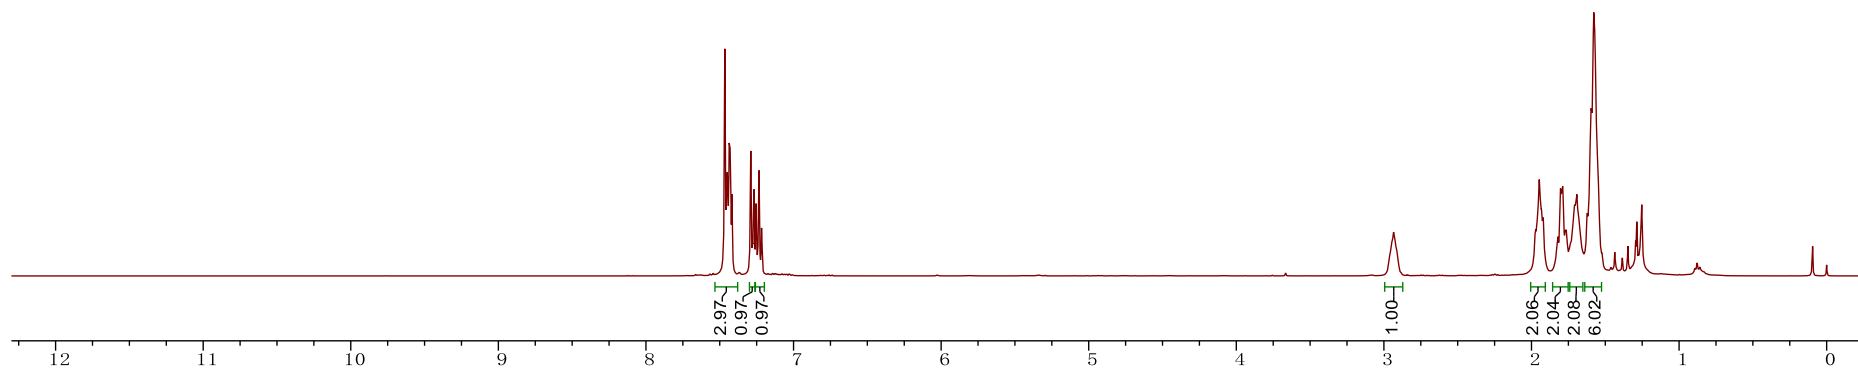

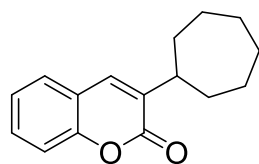

**40**

**<sup>13</sup>C NMR (101 MHz, CDCl<sub>3</sub>)**

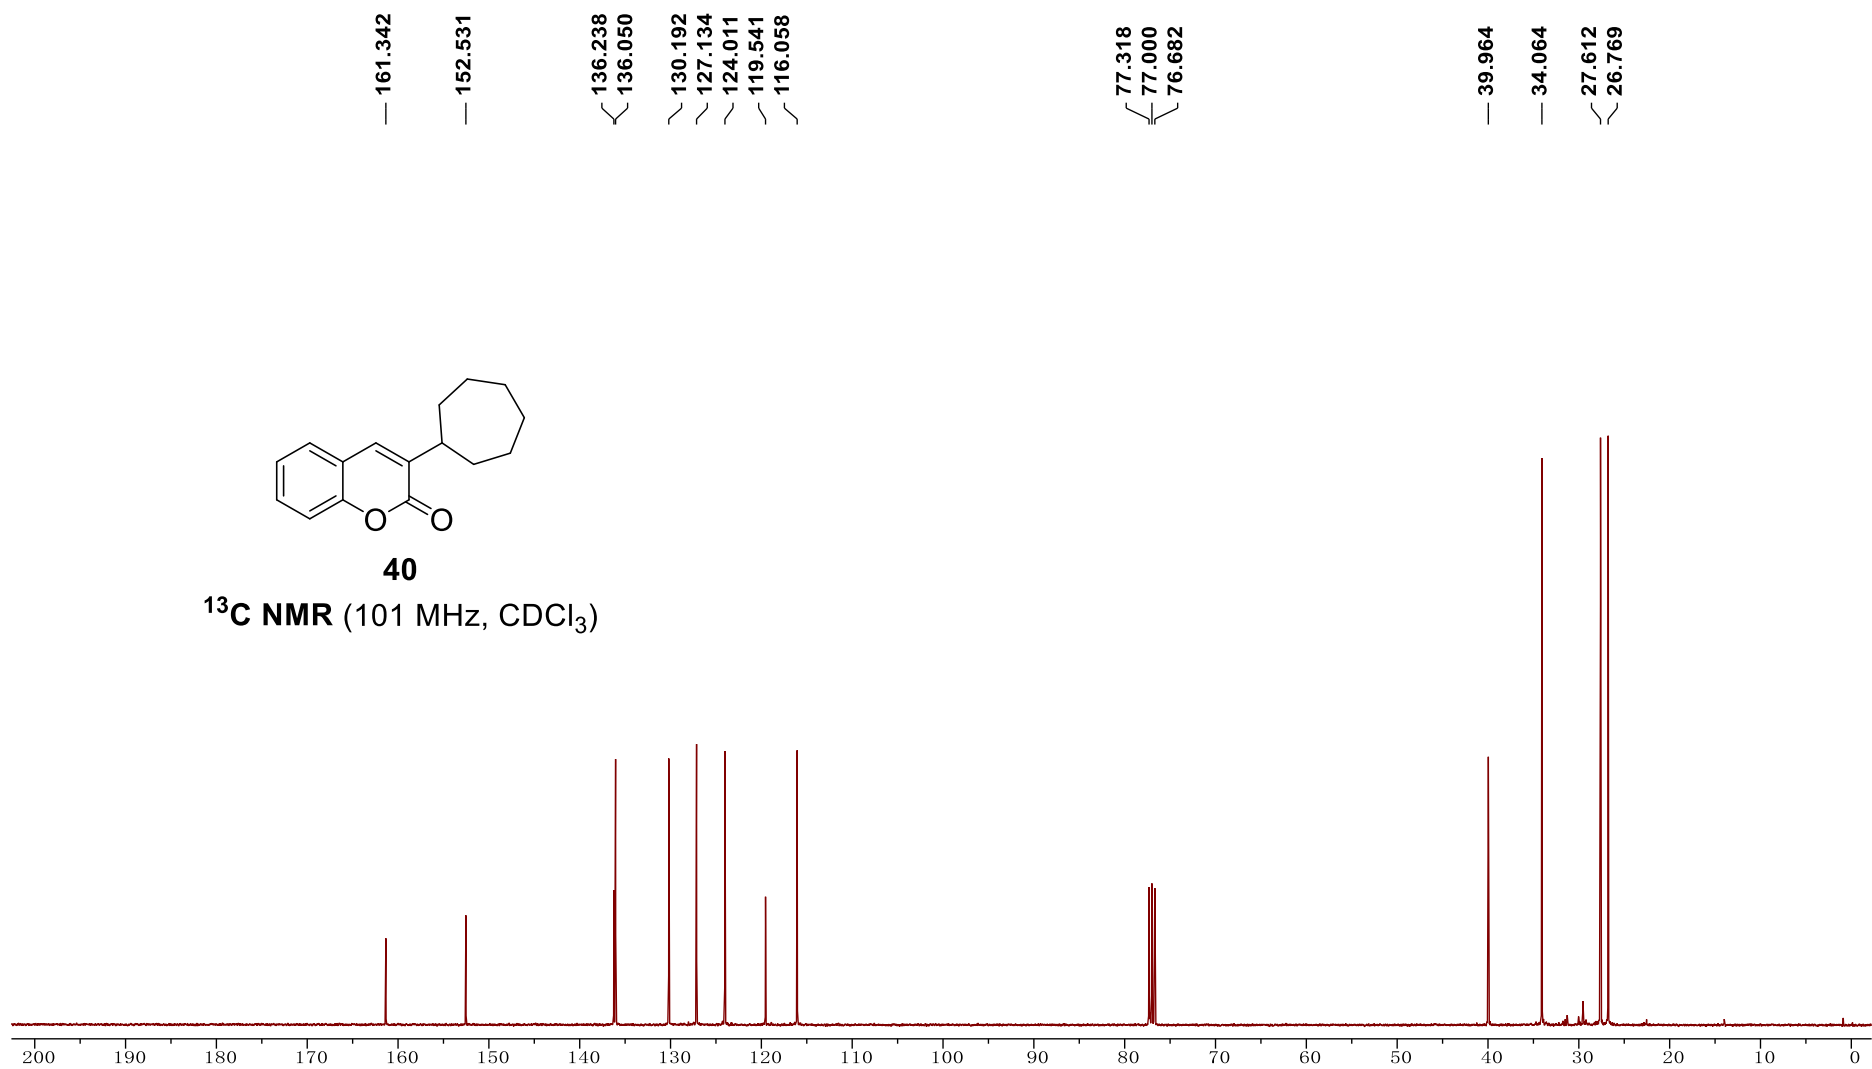



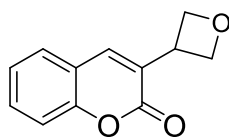

**41**

<sup>1</sup>H NMR (400 MHz, CDCl<sub>3</sub>)

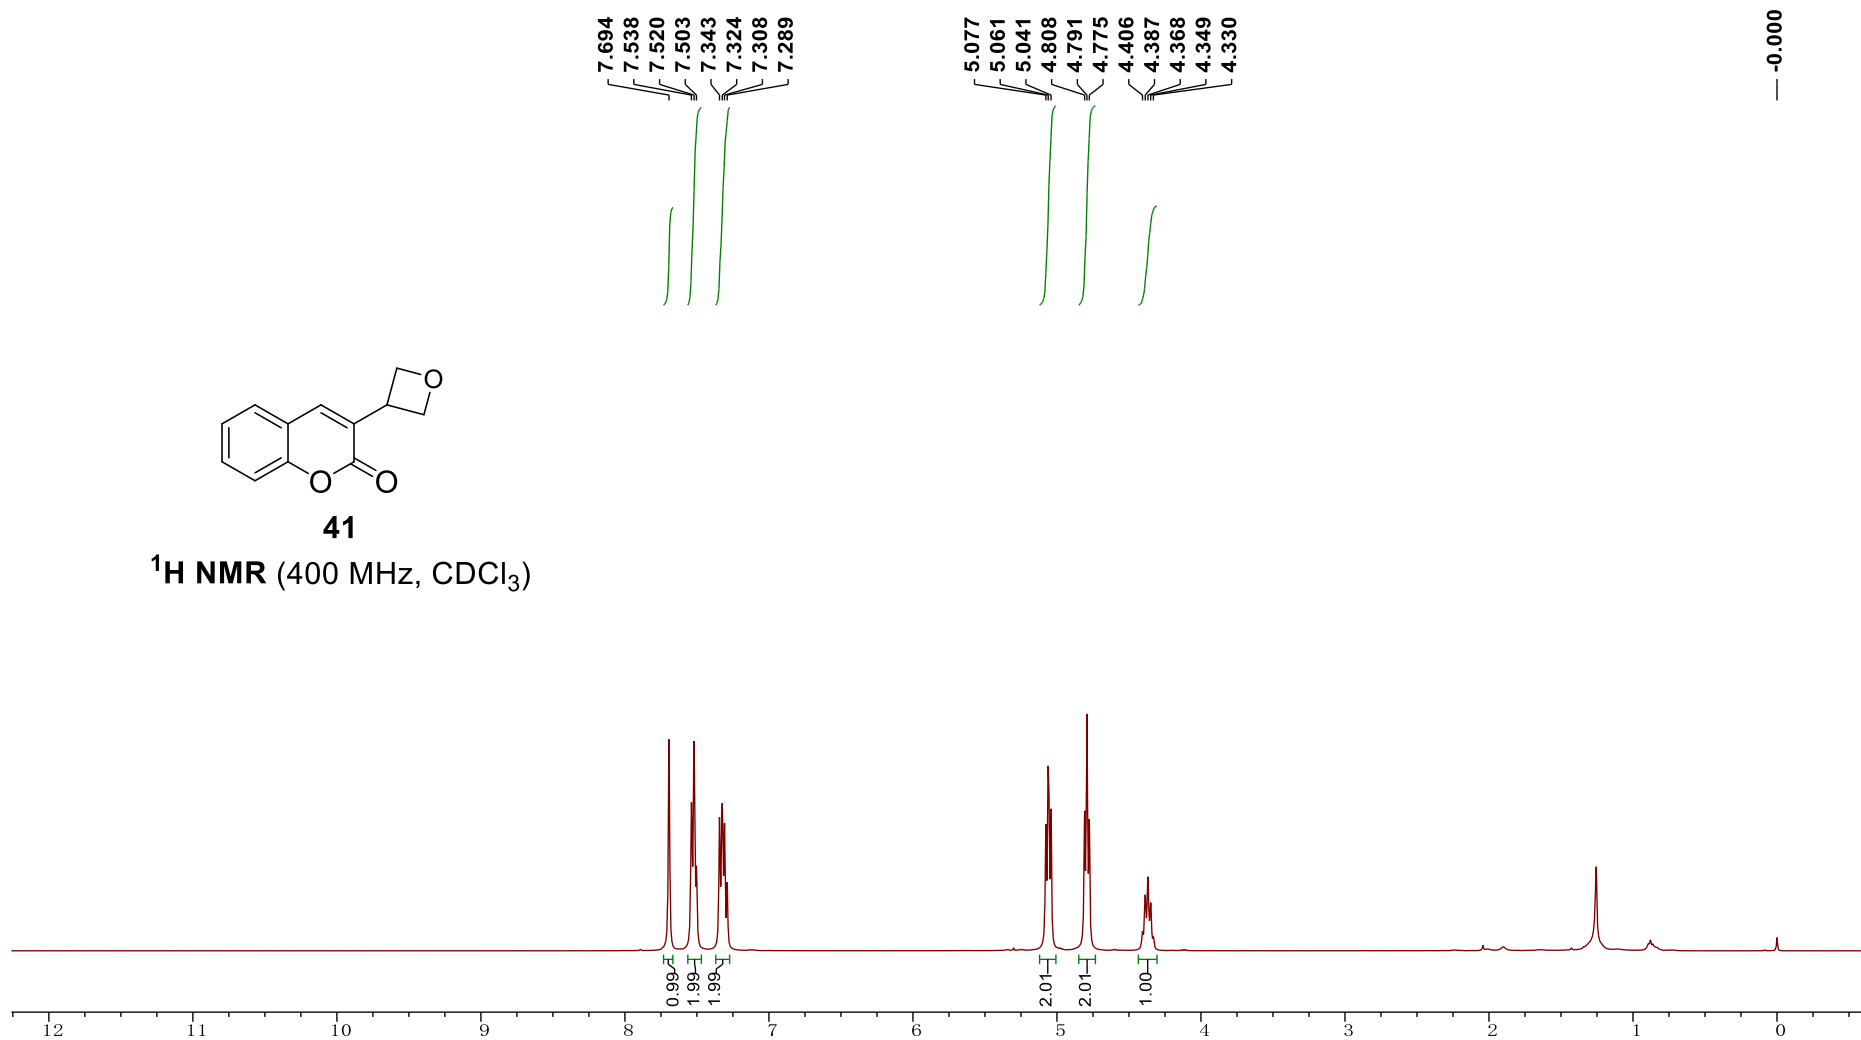

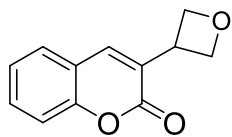

**41**

**<sup>13</sup>C NMR (101 MHz, CDCl<sub>3</sub>)**

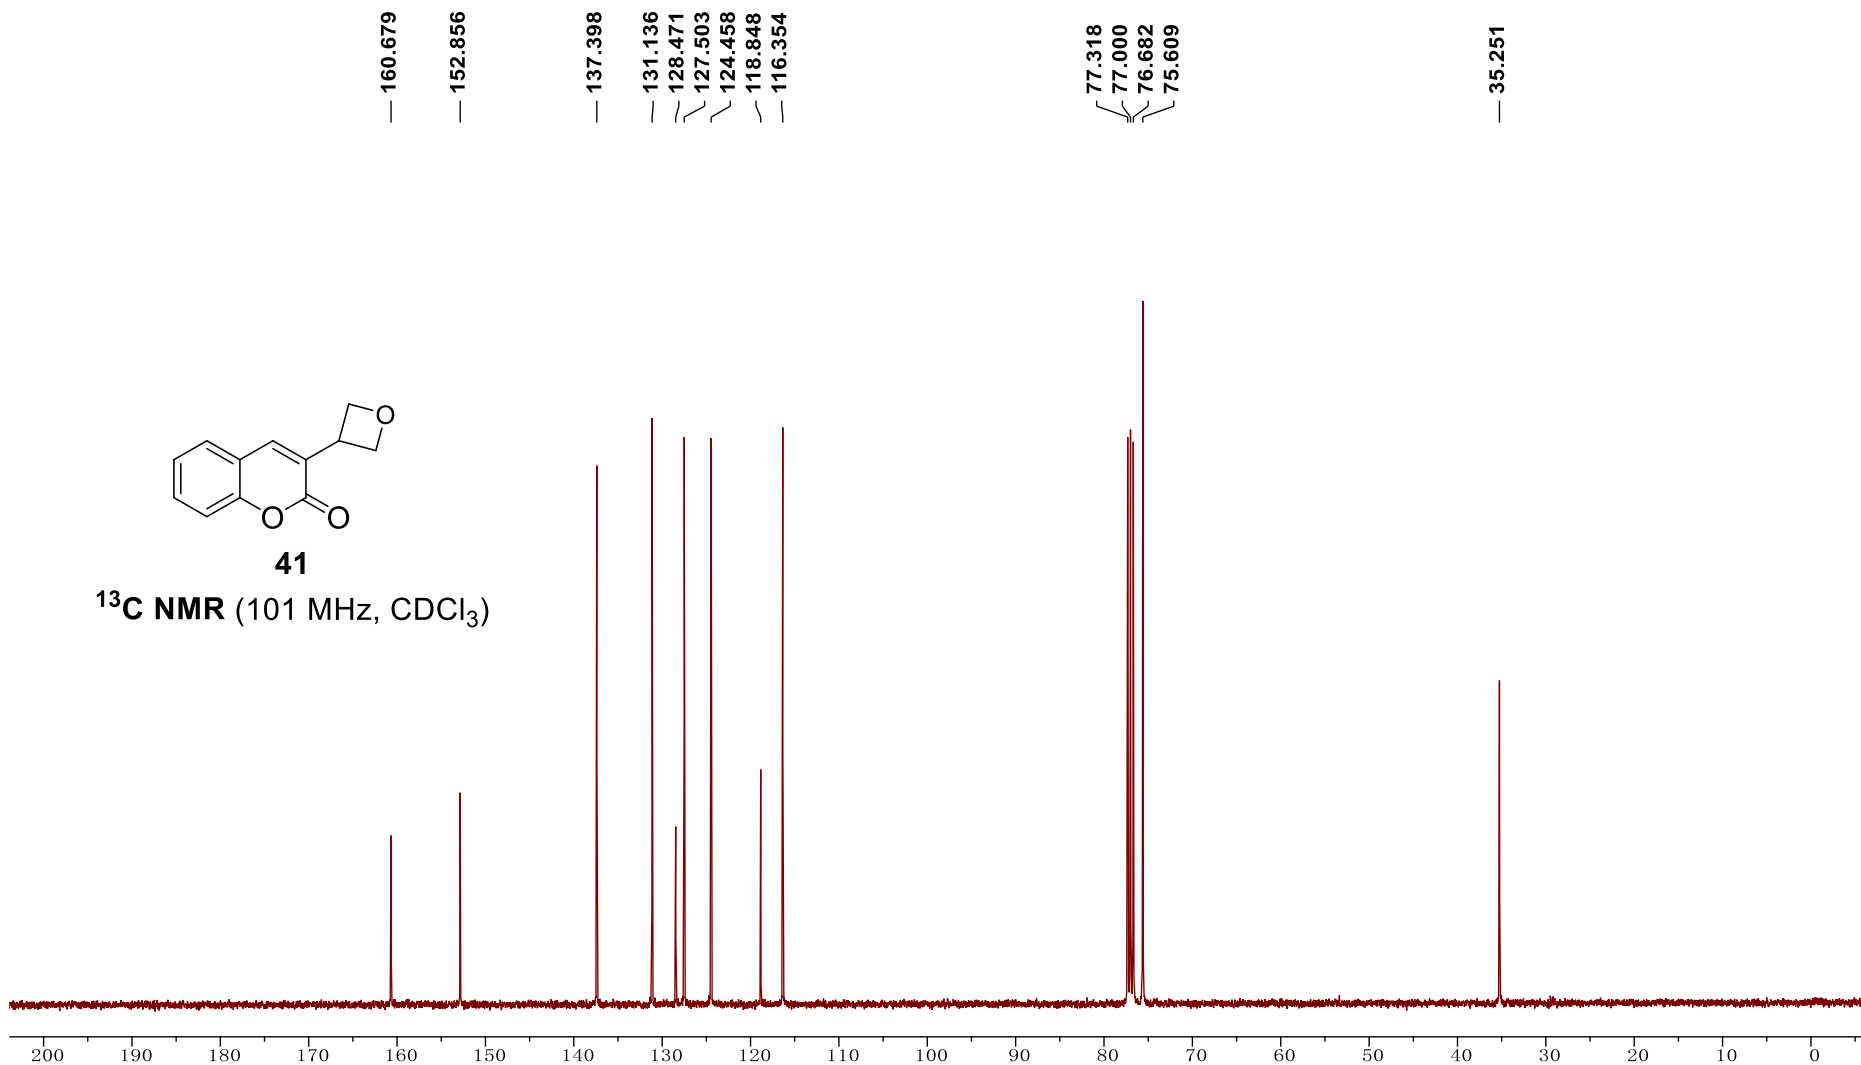

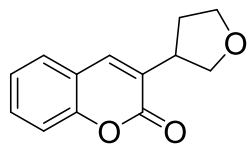

42

<sup>1</sup>H NMR (400 MHz, CDCl<sub>3</sub>)

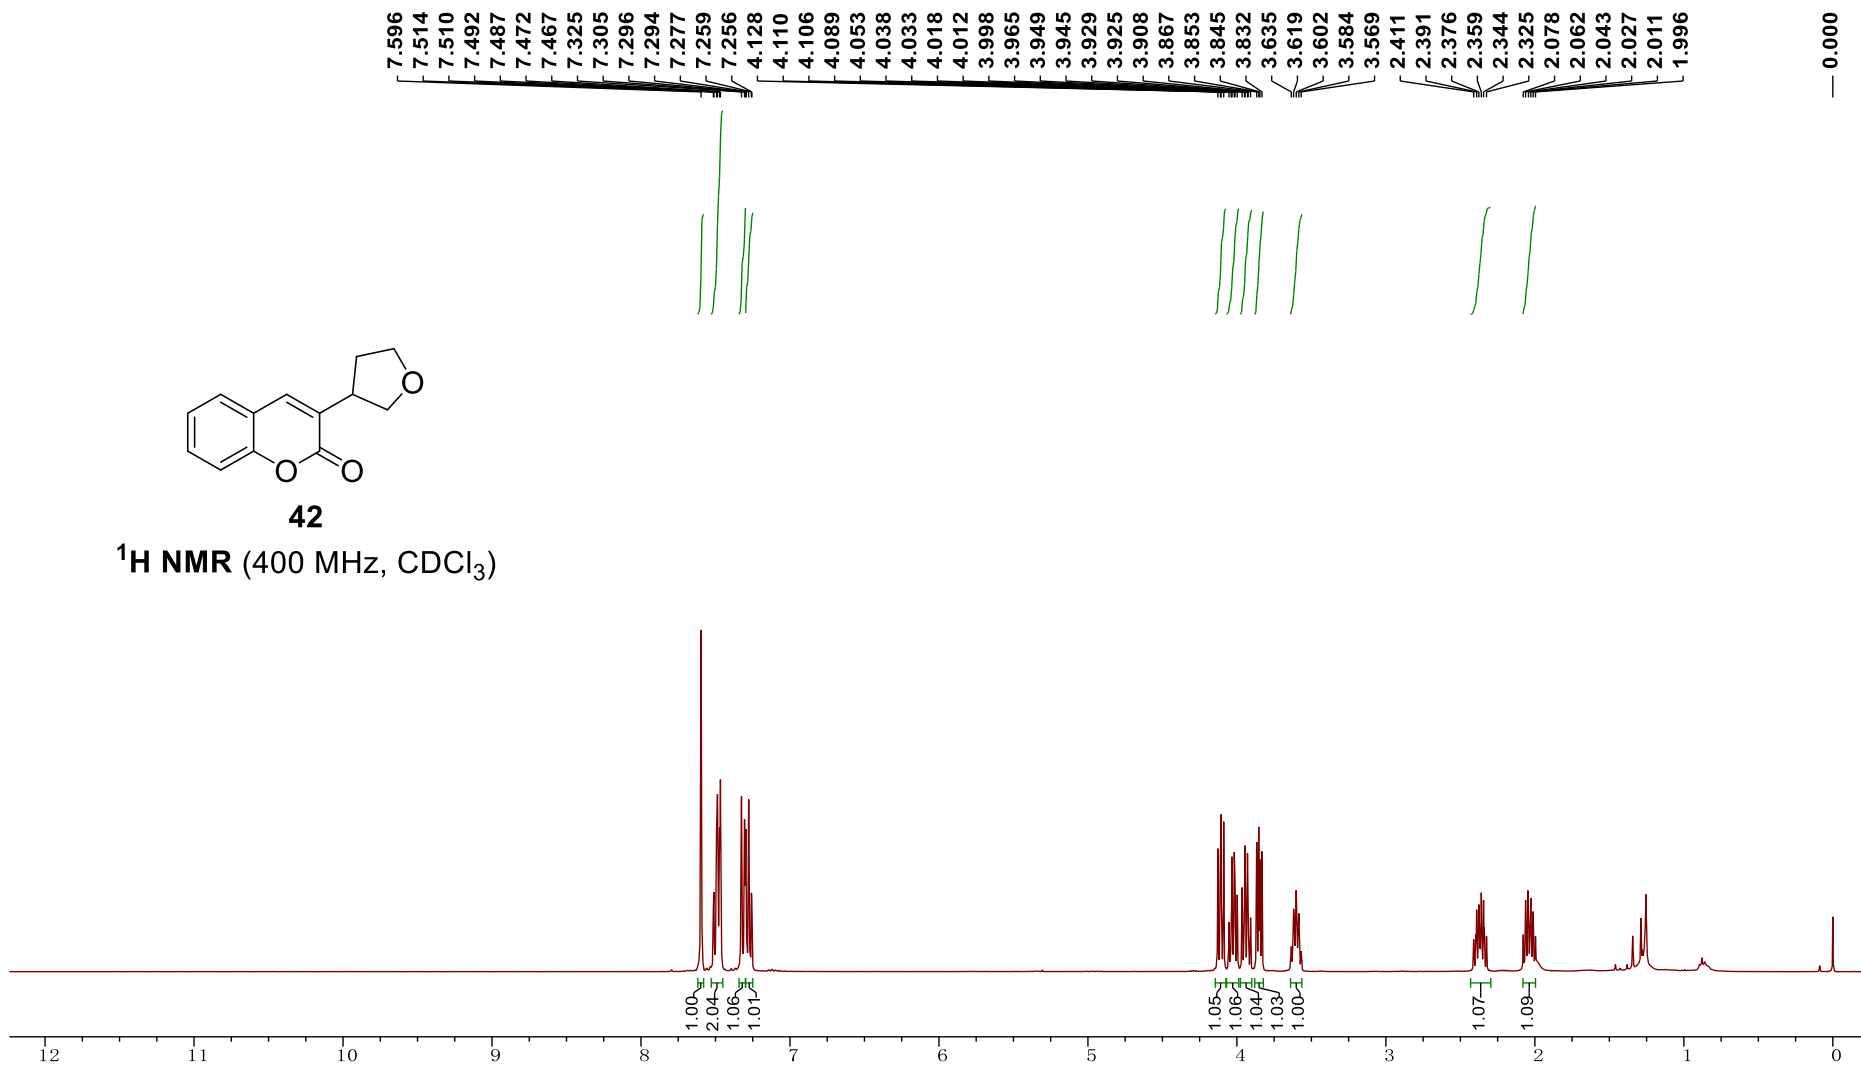

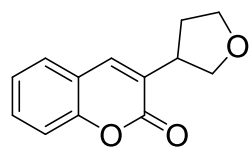

**42**

**<sup>13</sup>C NMR (101 MHz, CDCl<sub>3</sub>)**

— 161.296

— 152.785

— 137.231

— 130.858

— 130.243

— 127.432

— 124.307

— 119.095

— 116.239

— 77.318

— 77.000

— 76.682

— 71.958

— 67.624

— 39.306

— 31.366

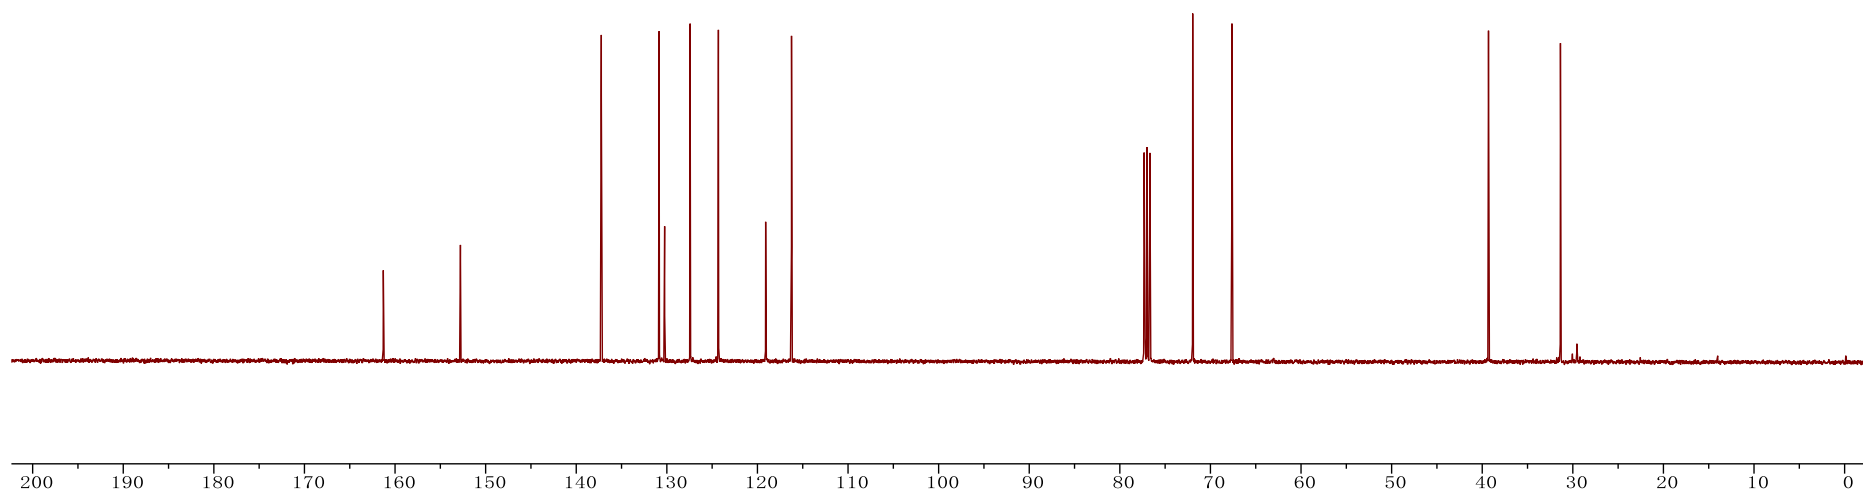

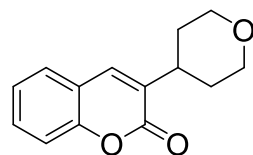

**43**

**<sup>1</sup>H NMR (400 MHz, CDCl<sub>3</sub>)**

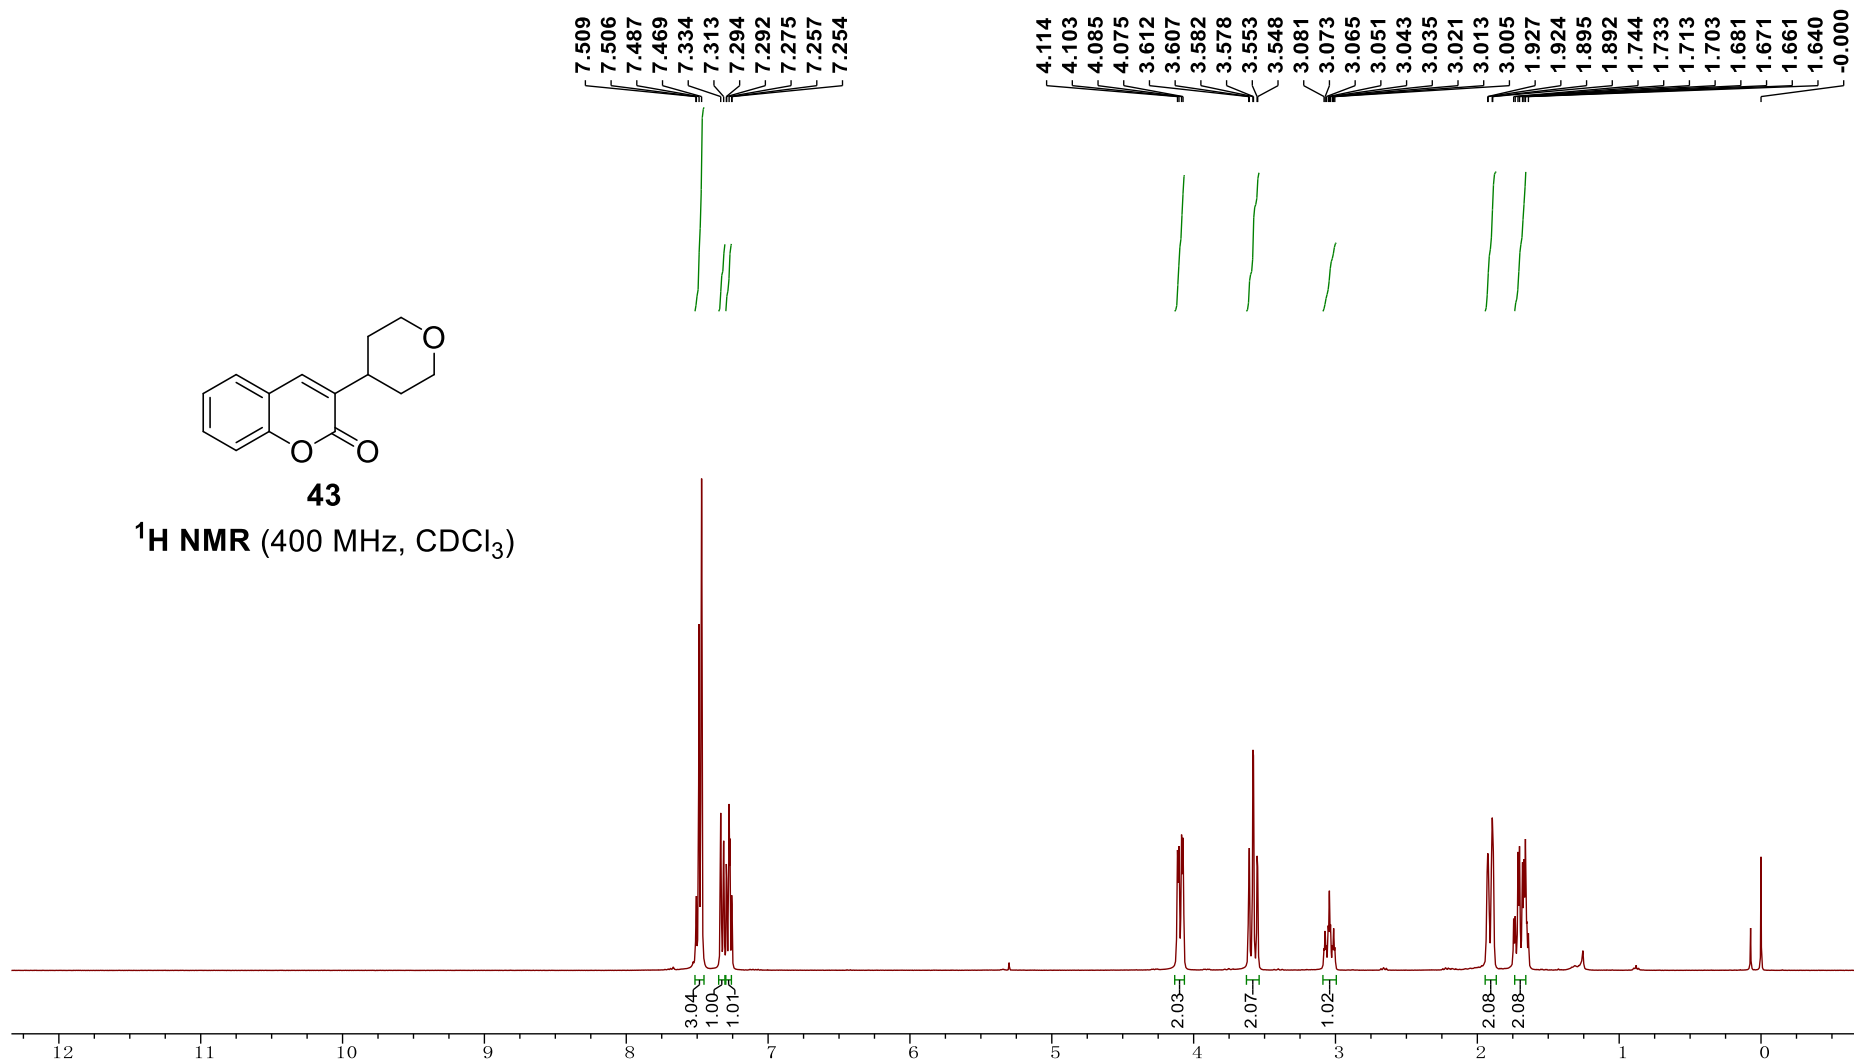

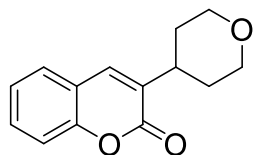

**43**

**<sup>13</sup>C NMR (101 MHz, CDCl<sub>3</sub>)**

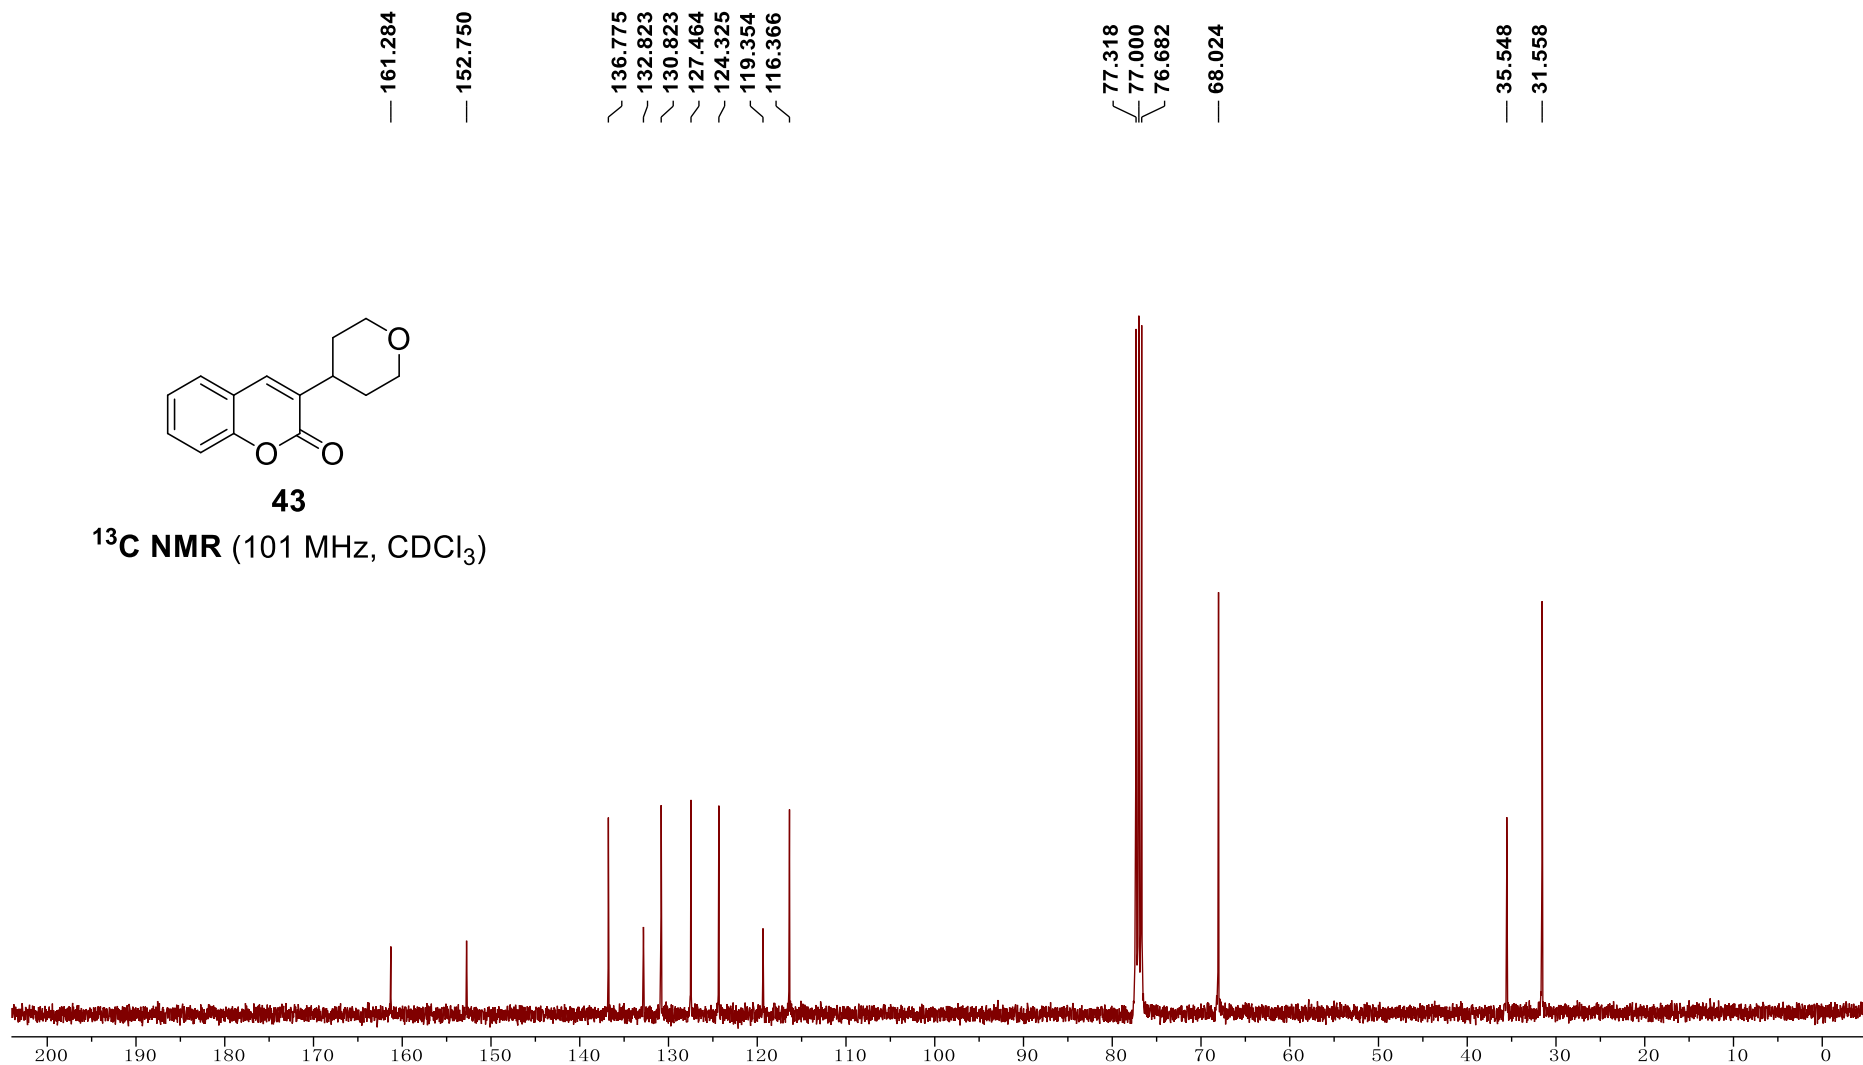

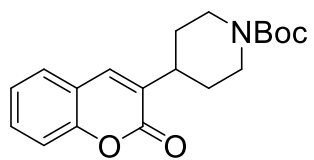

**44**

<sup>1</sup>H NMR (300 MHz, CDCl<sub>3</sub>)

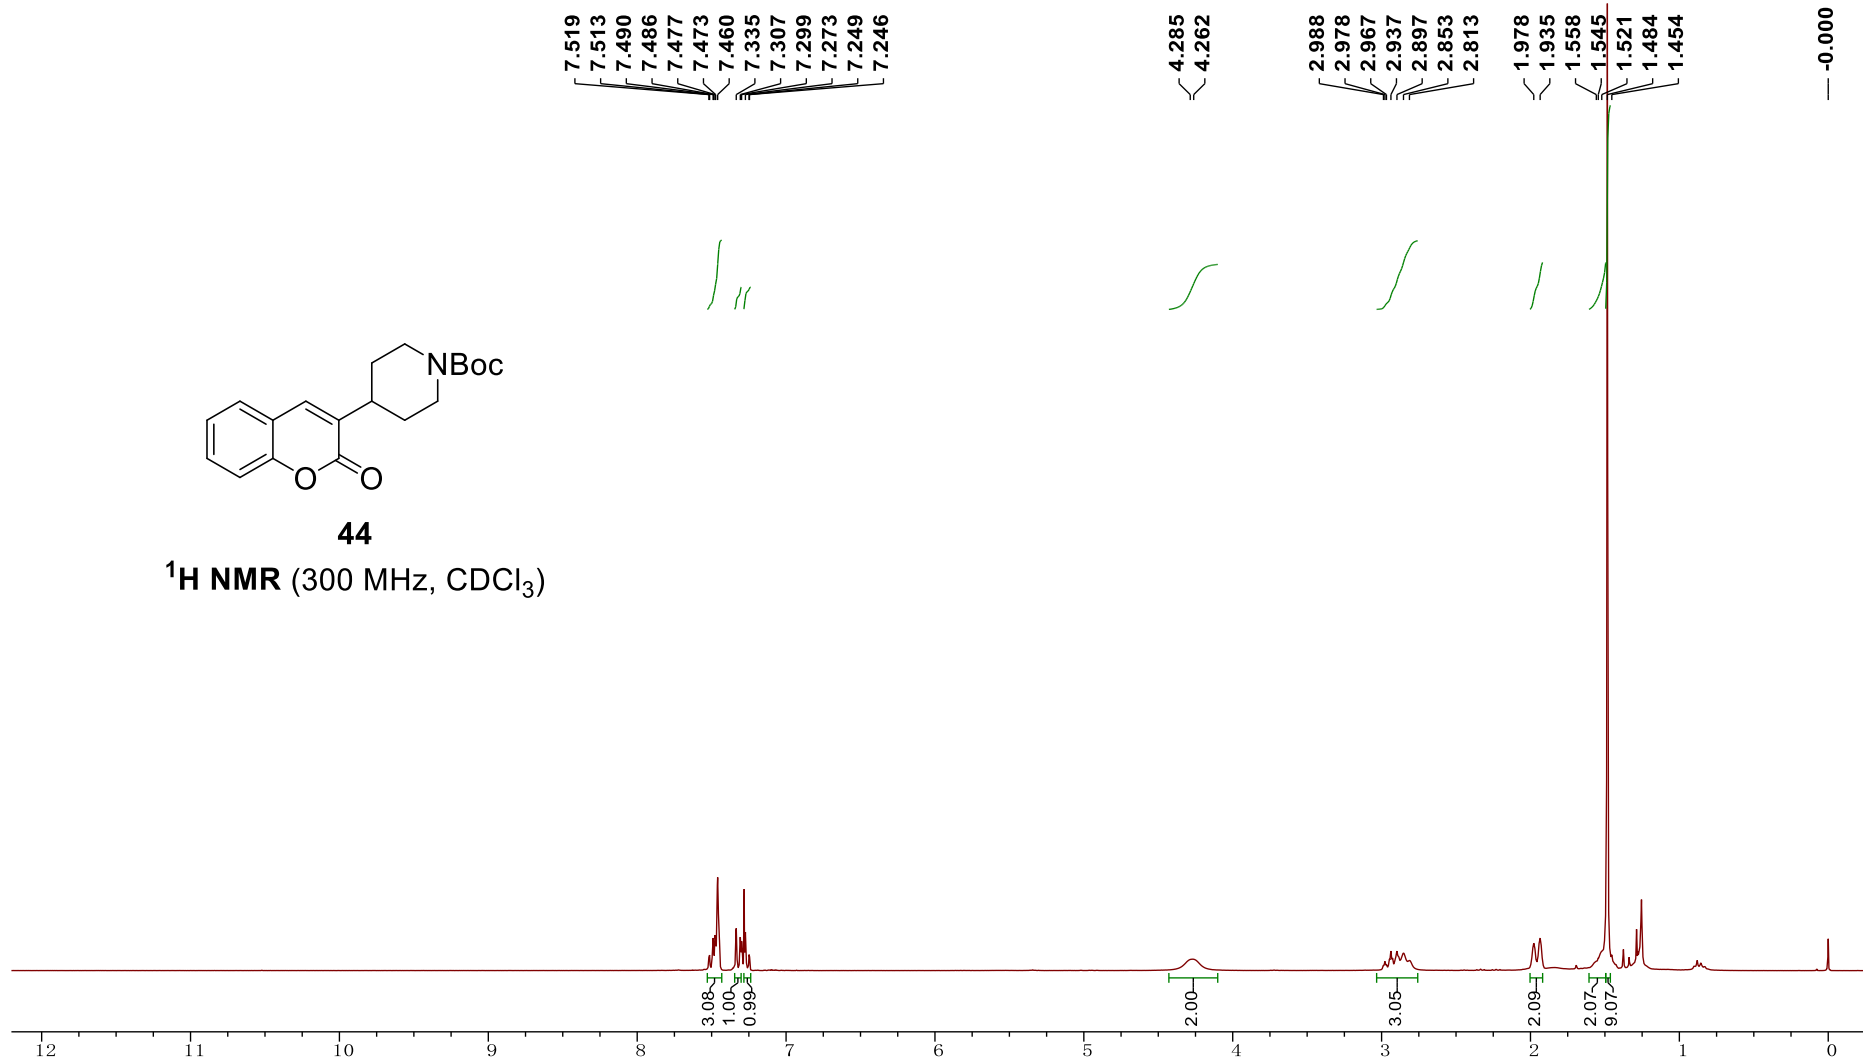

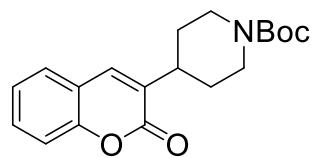

**44**

**<sup>13</sup>C NMR (101 MHz, CDCl<sub>3</sub>)**

— 161.284

— 154.687

— 152.720

— 136.876

— 132.768

— 130.843

— 127.437

— 124.332

— 119.281

— 116.345

— 79.527

— 77.318

— 77.000

— 76.682

— 44.213

— 36.519

— 30.730

— 28.413

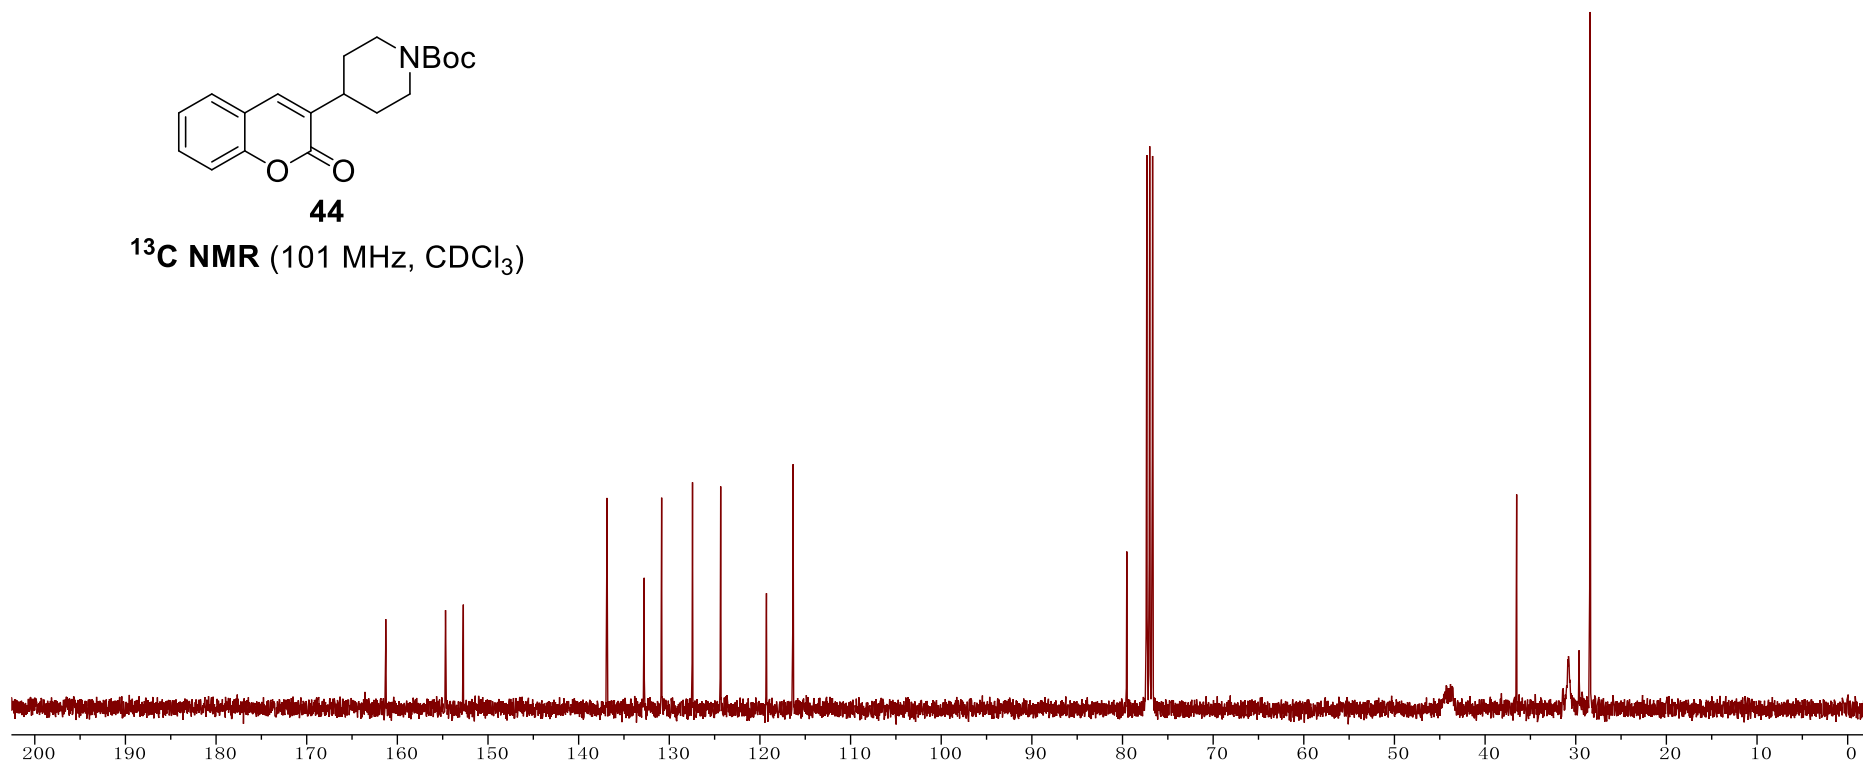



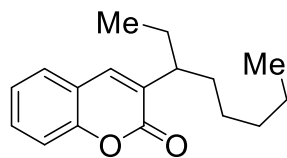

**45**

**<sup>1</sup>H NMR (400 MHz, CDCl<sub>3</sub>)**

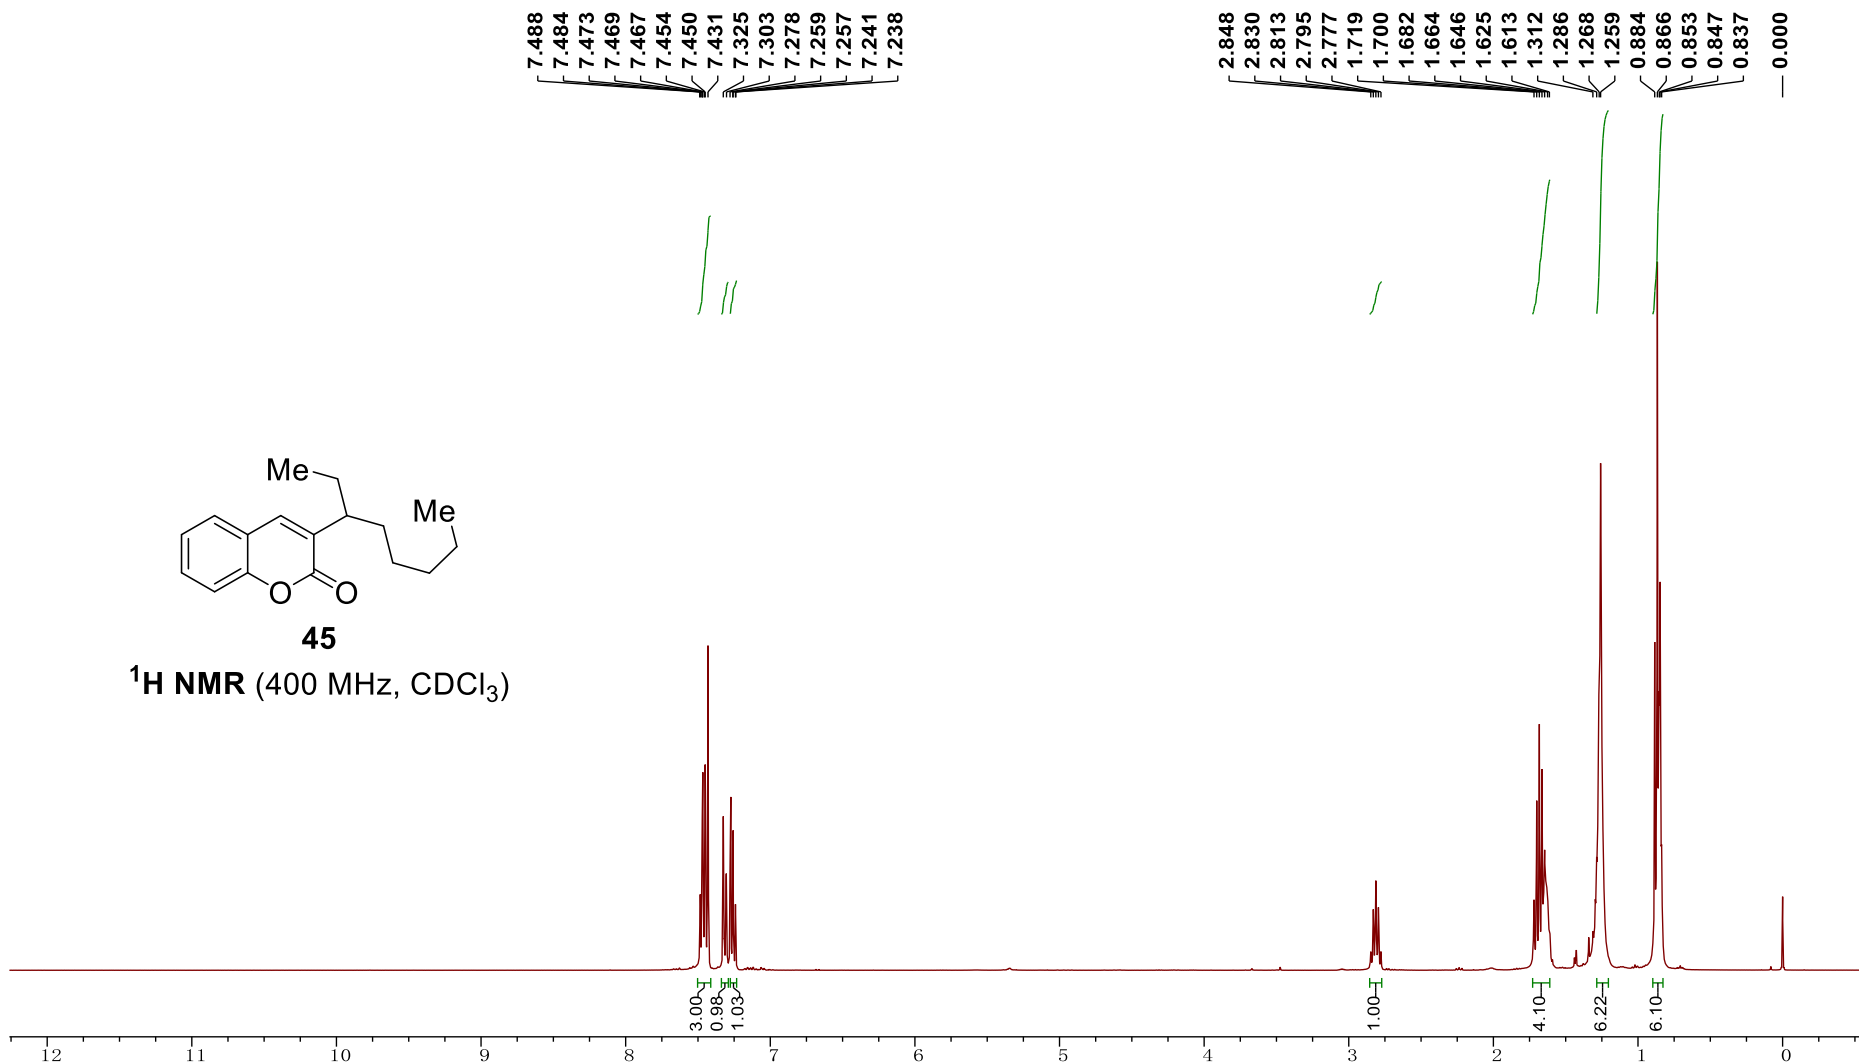

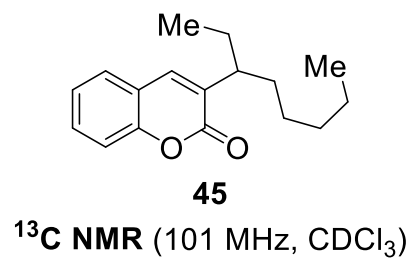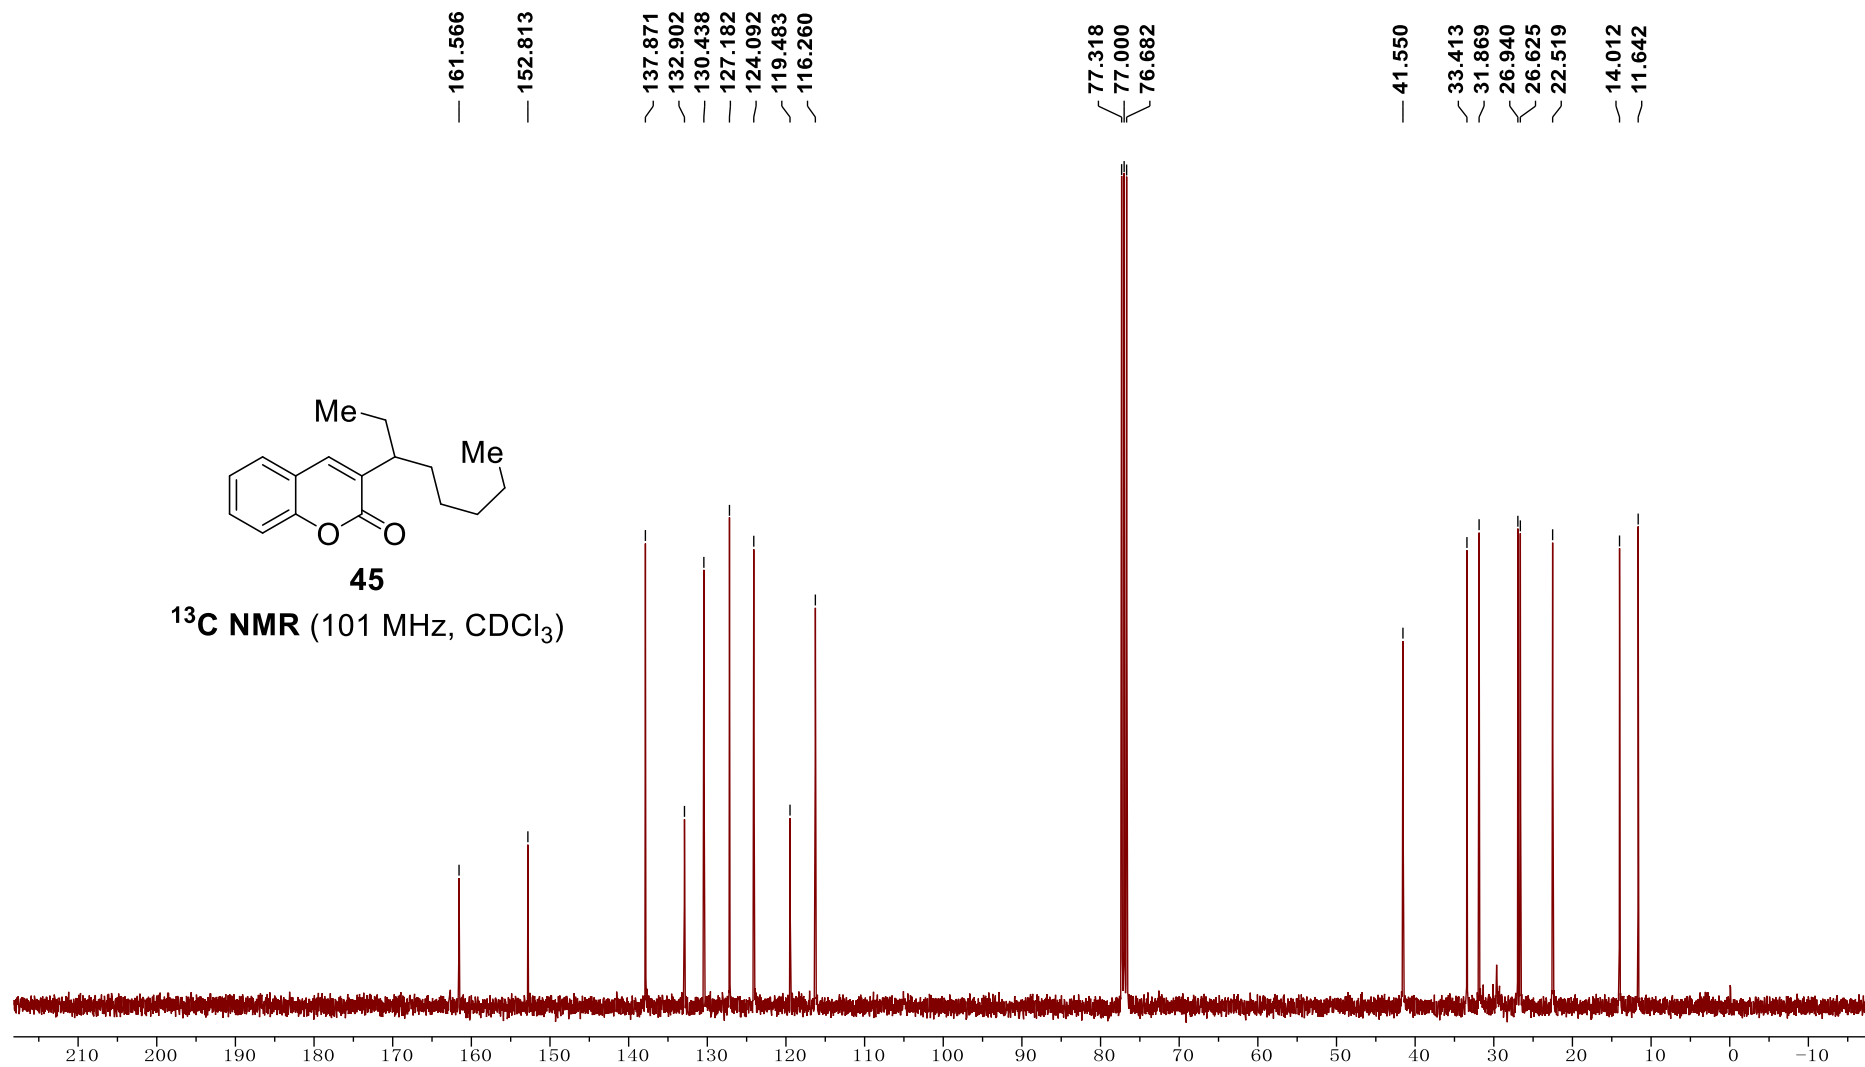

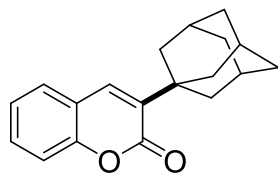

**46**

<sup>1</sup>H NMR (400 MHz, CDCl<sub>3</sub>)

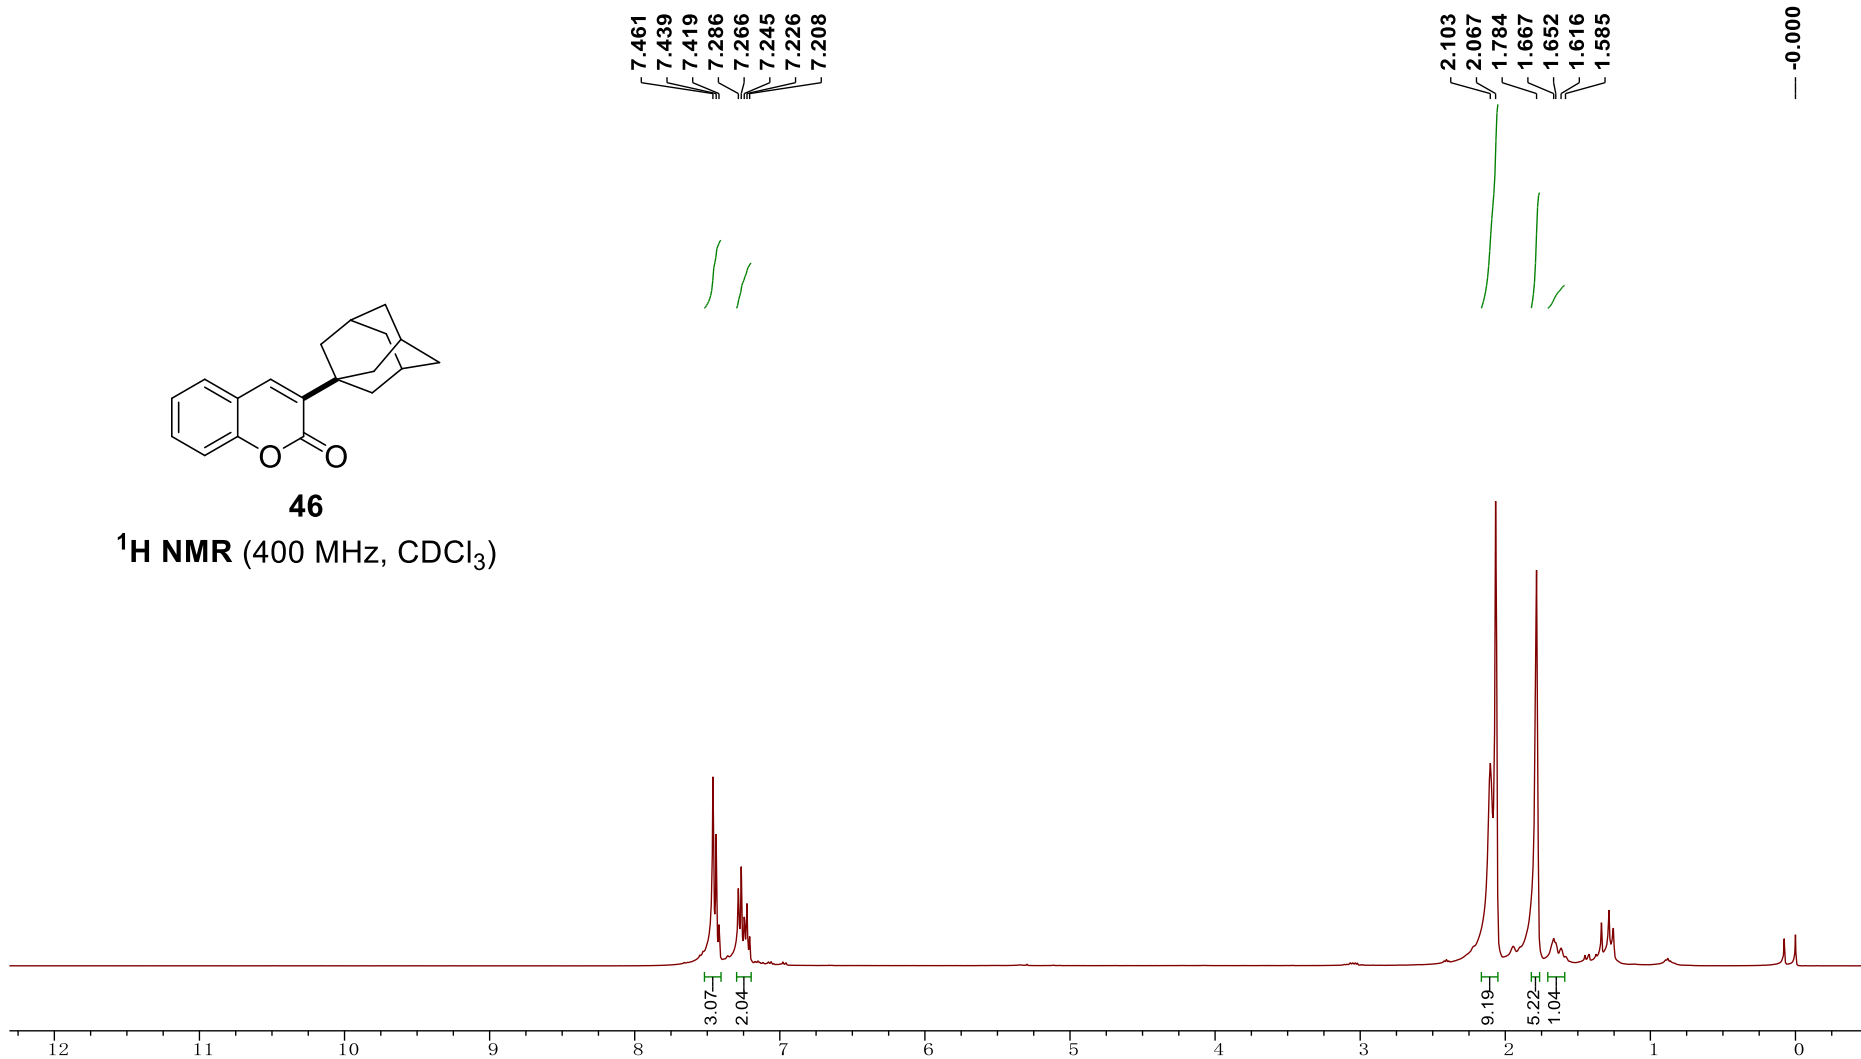

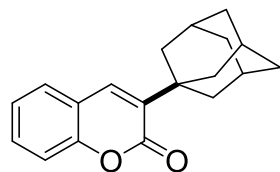

**46**

**<sup>13</sup>C NMR (101 MHz, CDCl<sub>3</sub>)**

— 159.502

— 152.937

∩ 137.140  
∩ 136.917

∩ 130.400  
∩ 127.573  
∩ 123.892  
∩ 119.540  
∩ 115.881

∩ 77.318  
∩ 77.000  
∩ 76.683

∩ 39.759  
∩ 37.065  
∩ 36.720

— 28.484

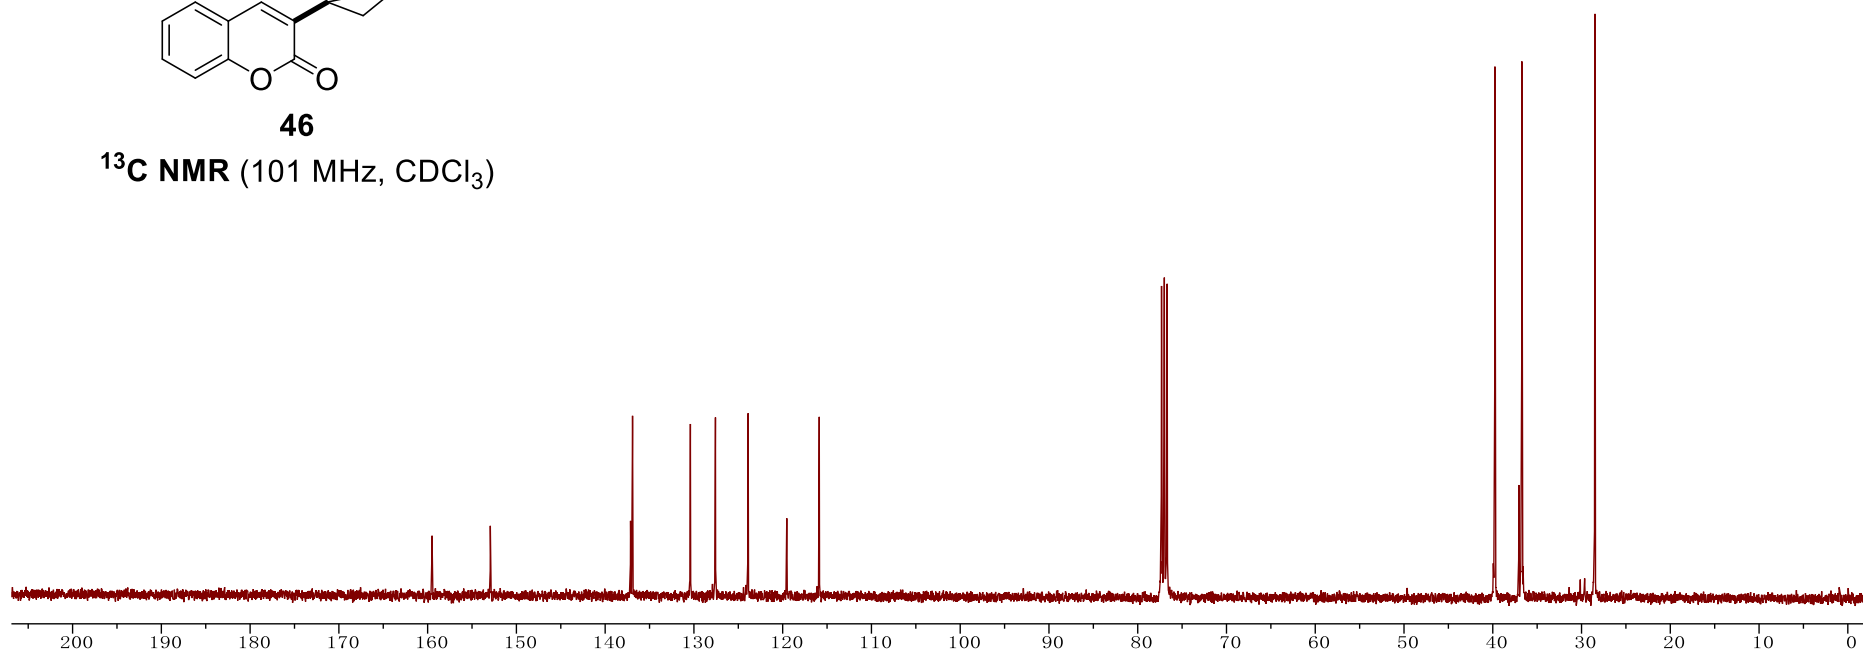

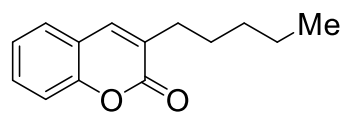

**47**

**<sup>1</sup>H NMR (400 MHz, CDCl<sub>3</sub>)**

7.483  
7.458  
7.450  
7.438  
7.431  
7.318  
7.298  
7.252  
7.234  
7.231

2.582  
2.563  
2.544  
1.687  
1.669  
1.650  
1.631  
1.612  
1.393  
1.384  
1.376  
1.366  
1.357  
0.929  
0.912  
0.894

-0.000

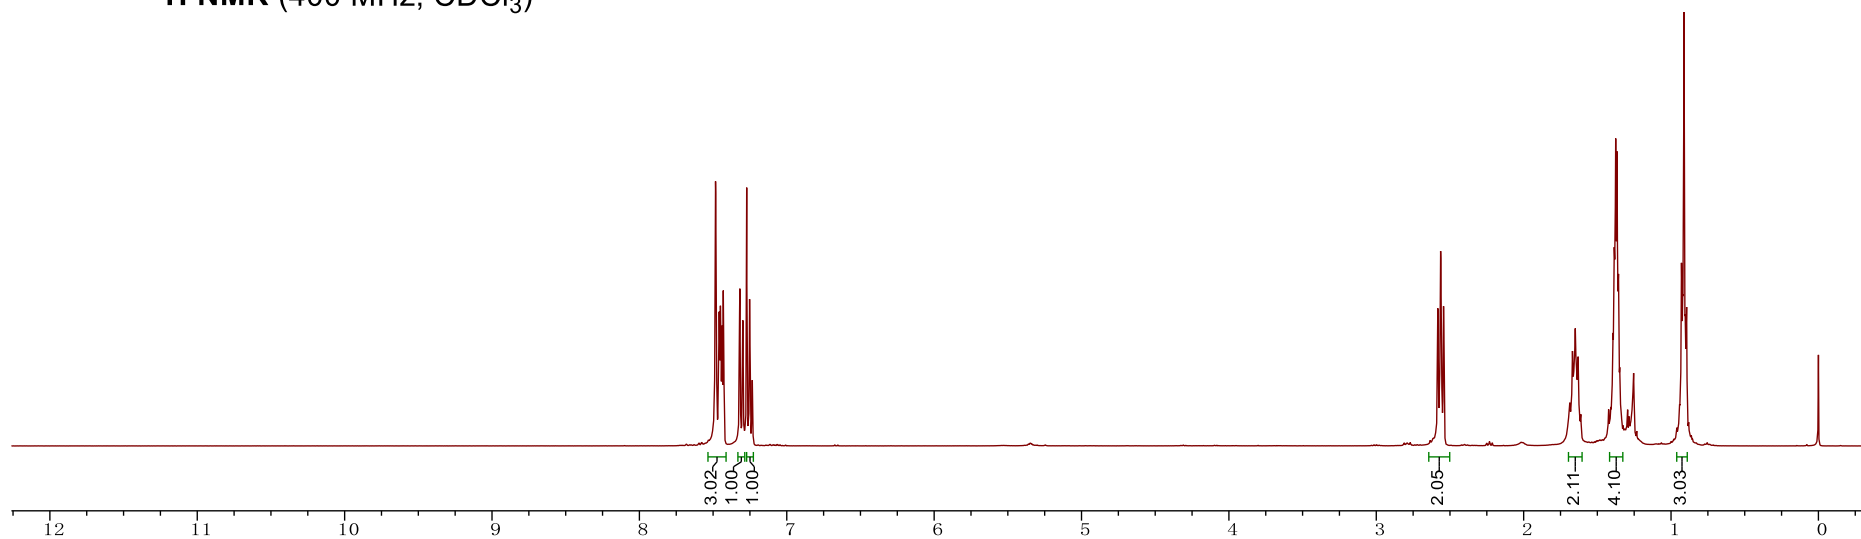

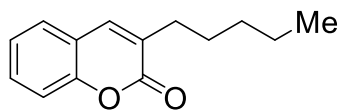

**47**

**<sup>13</sup>C NMR (101 MHz, CDCl<sub>3</sub>)**

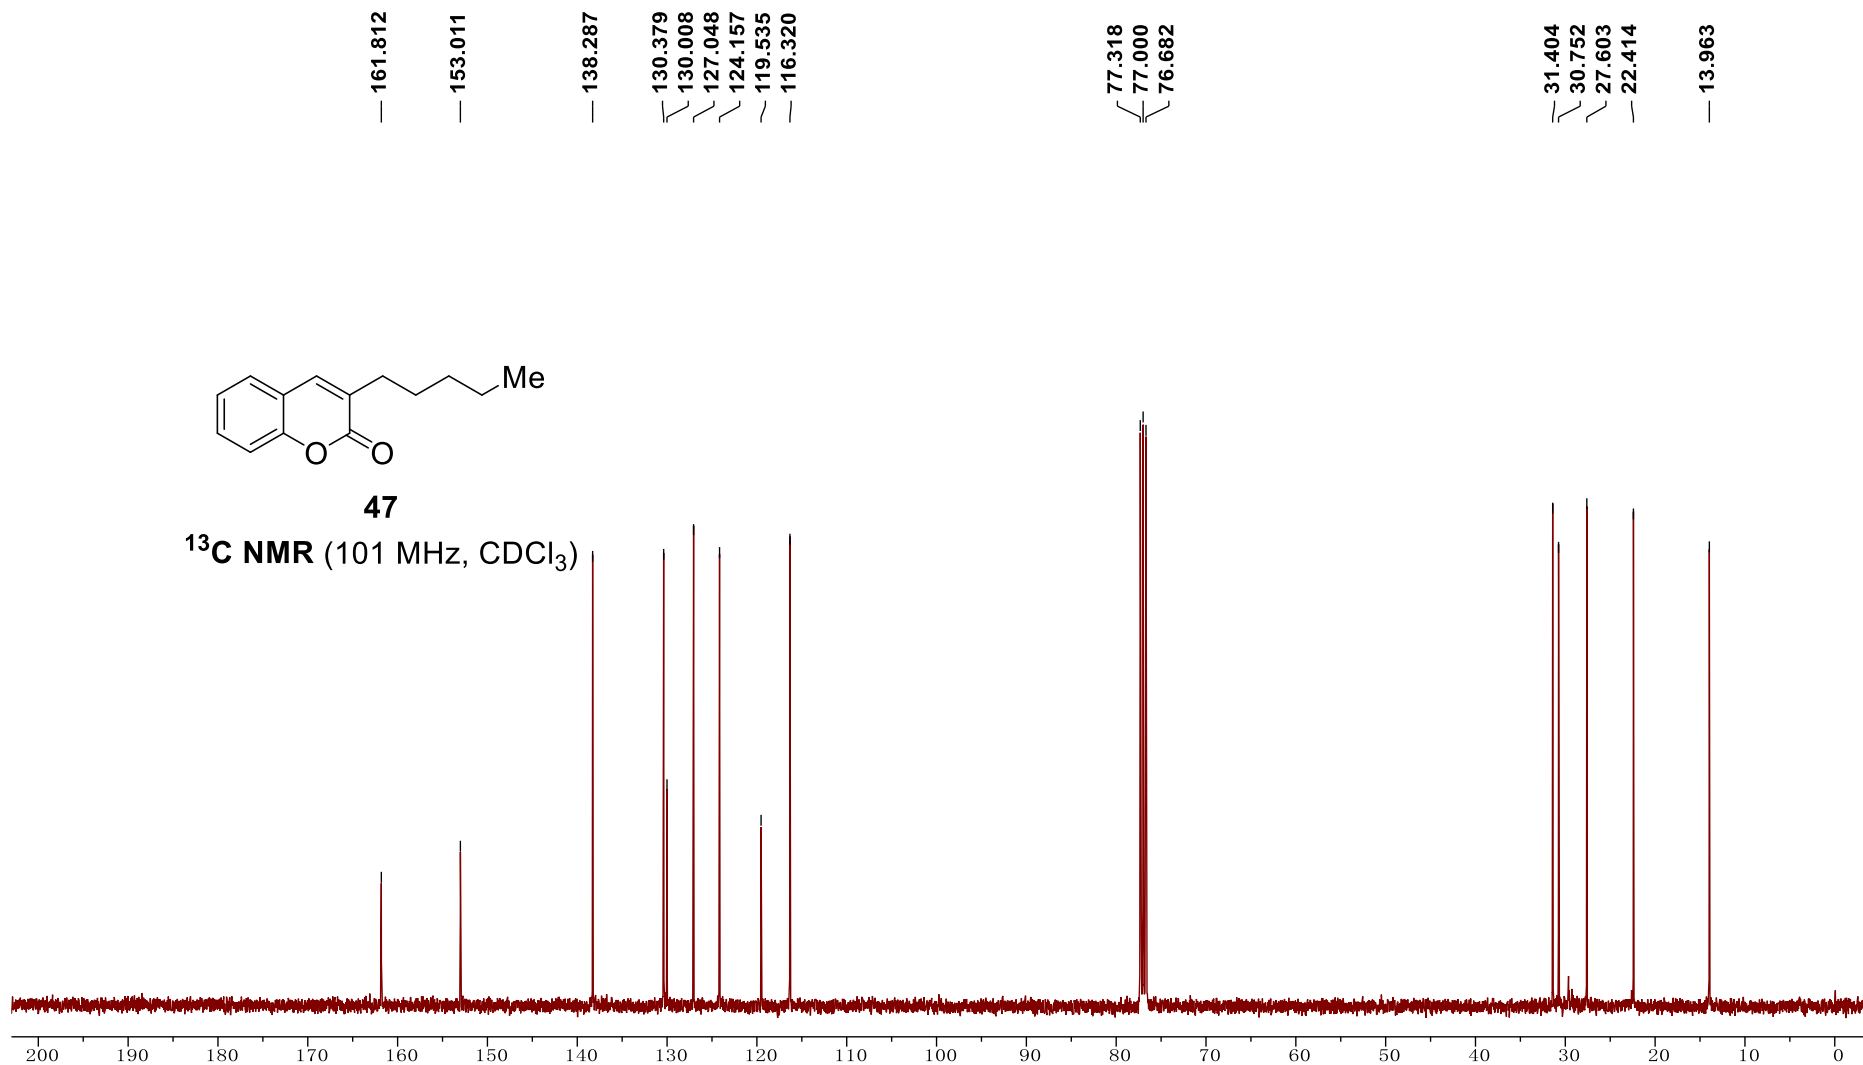

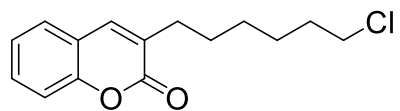

48

$^1\text{H NMR}$  (400 MHz,  $\text{CDCl}_3$ )

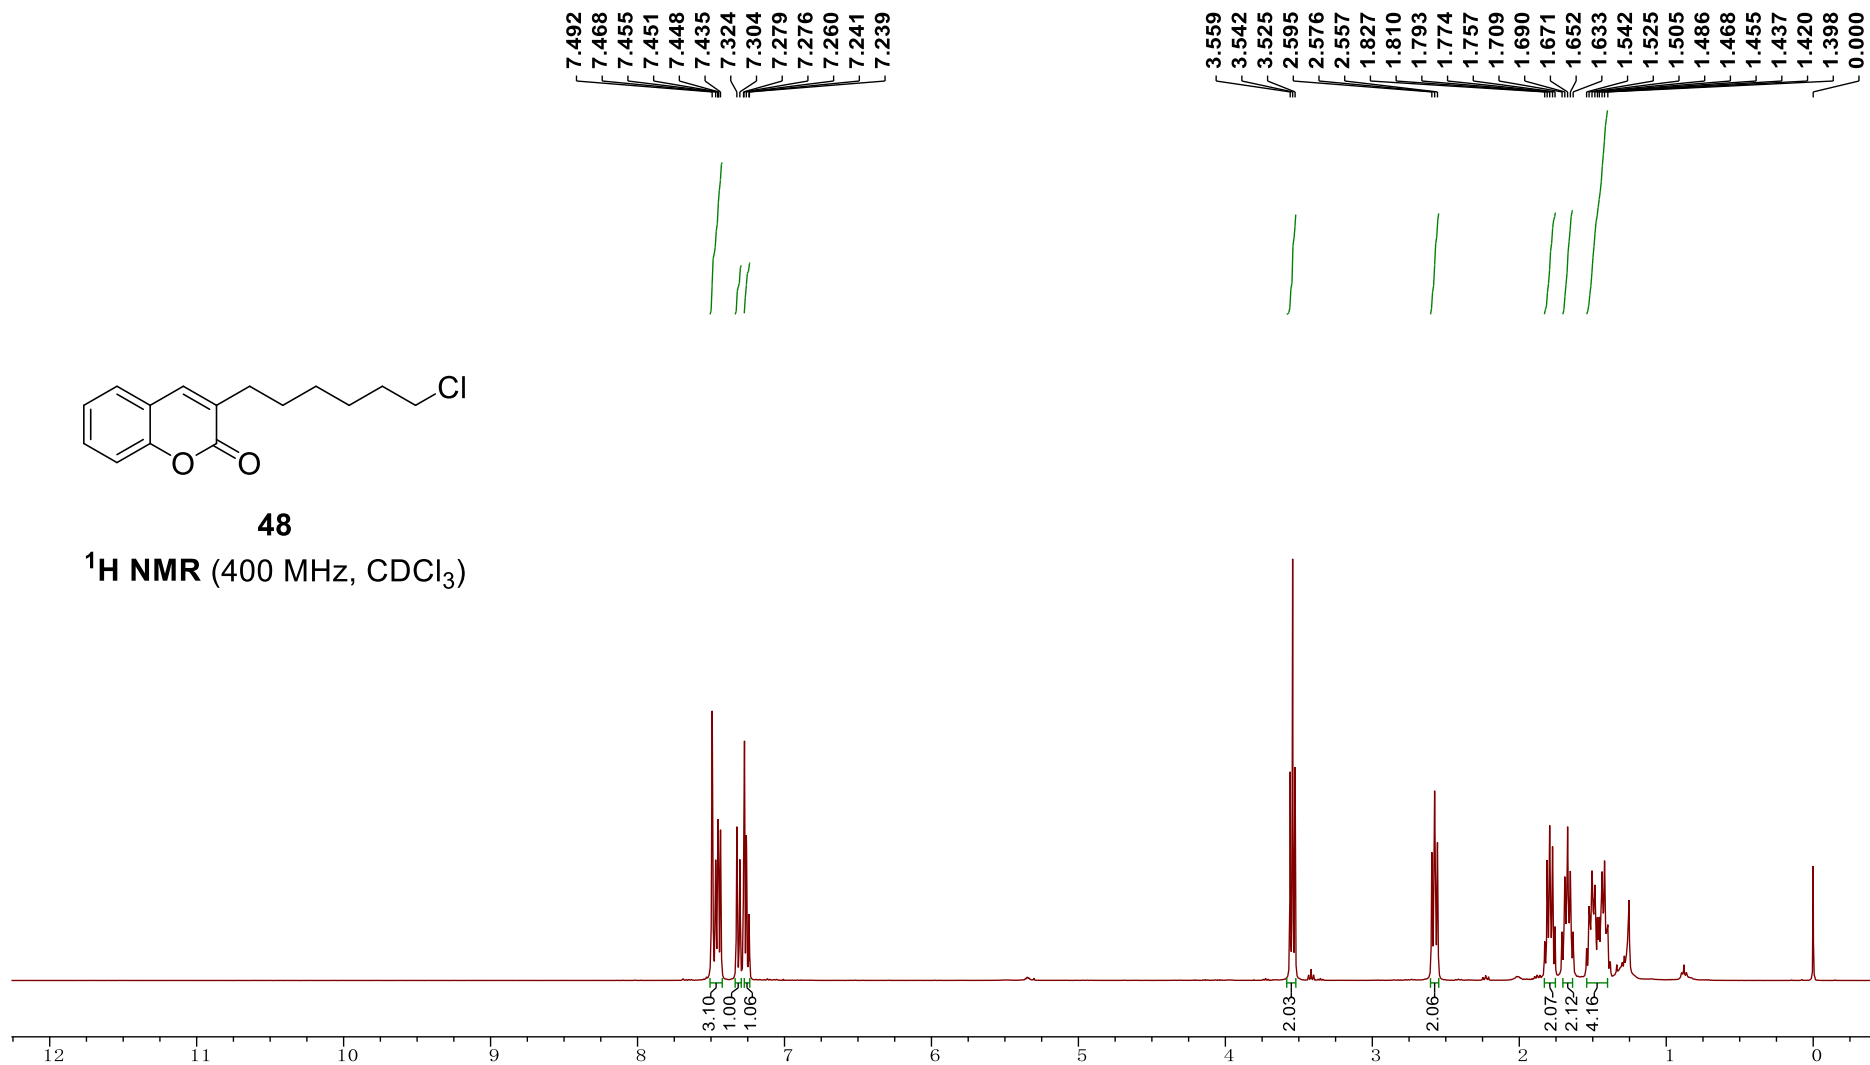

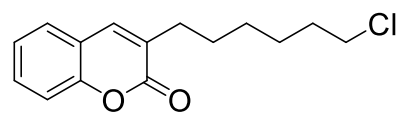

**48**

**<sup>13</sup>C NMR (101 MHz, CDCl<sub>3</sub>)**

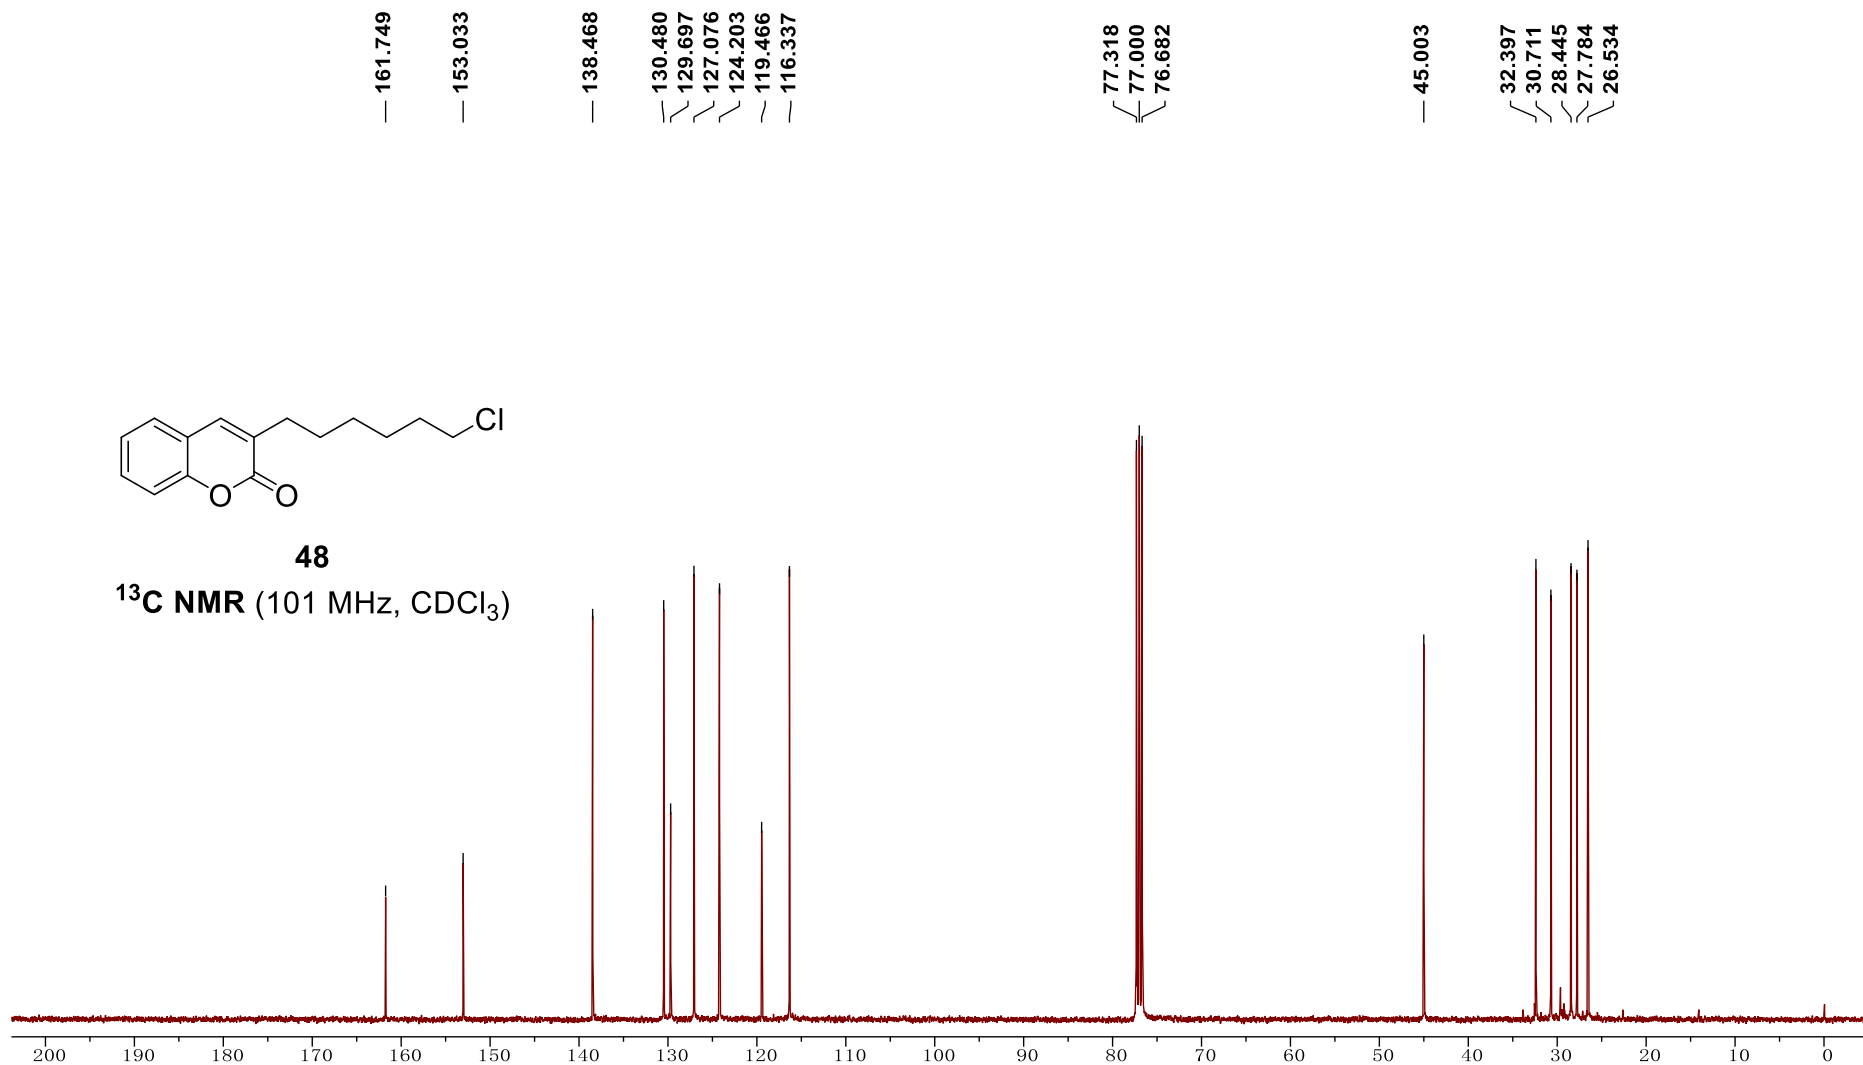



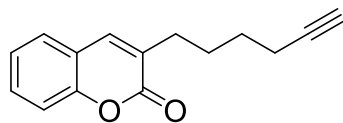

**49**

<sup>1</sup>H NMR (400 MHz, CDCl<sub>3</sub>)

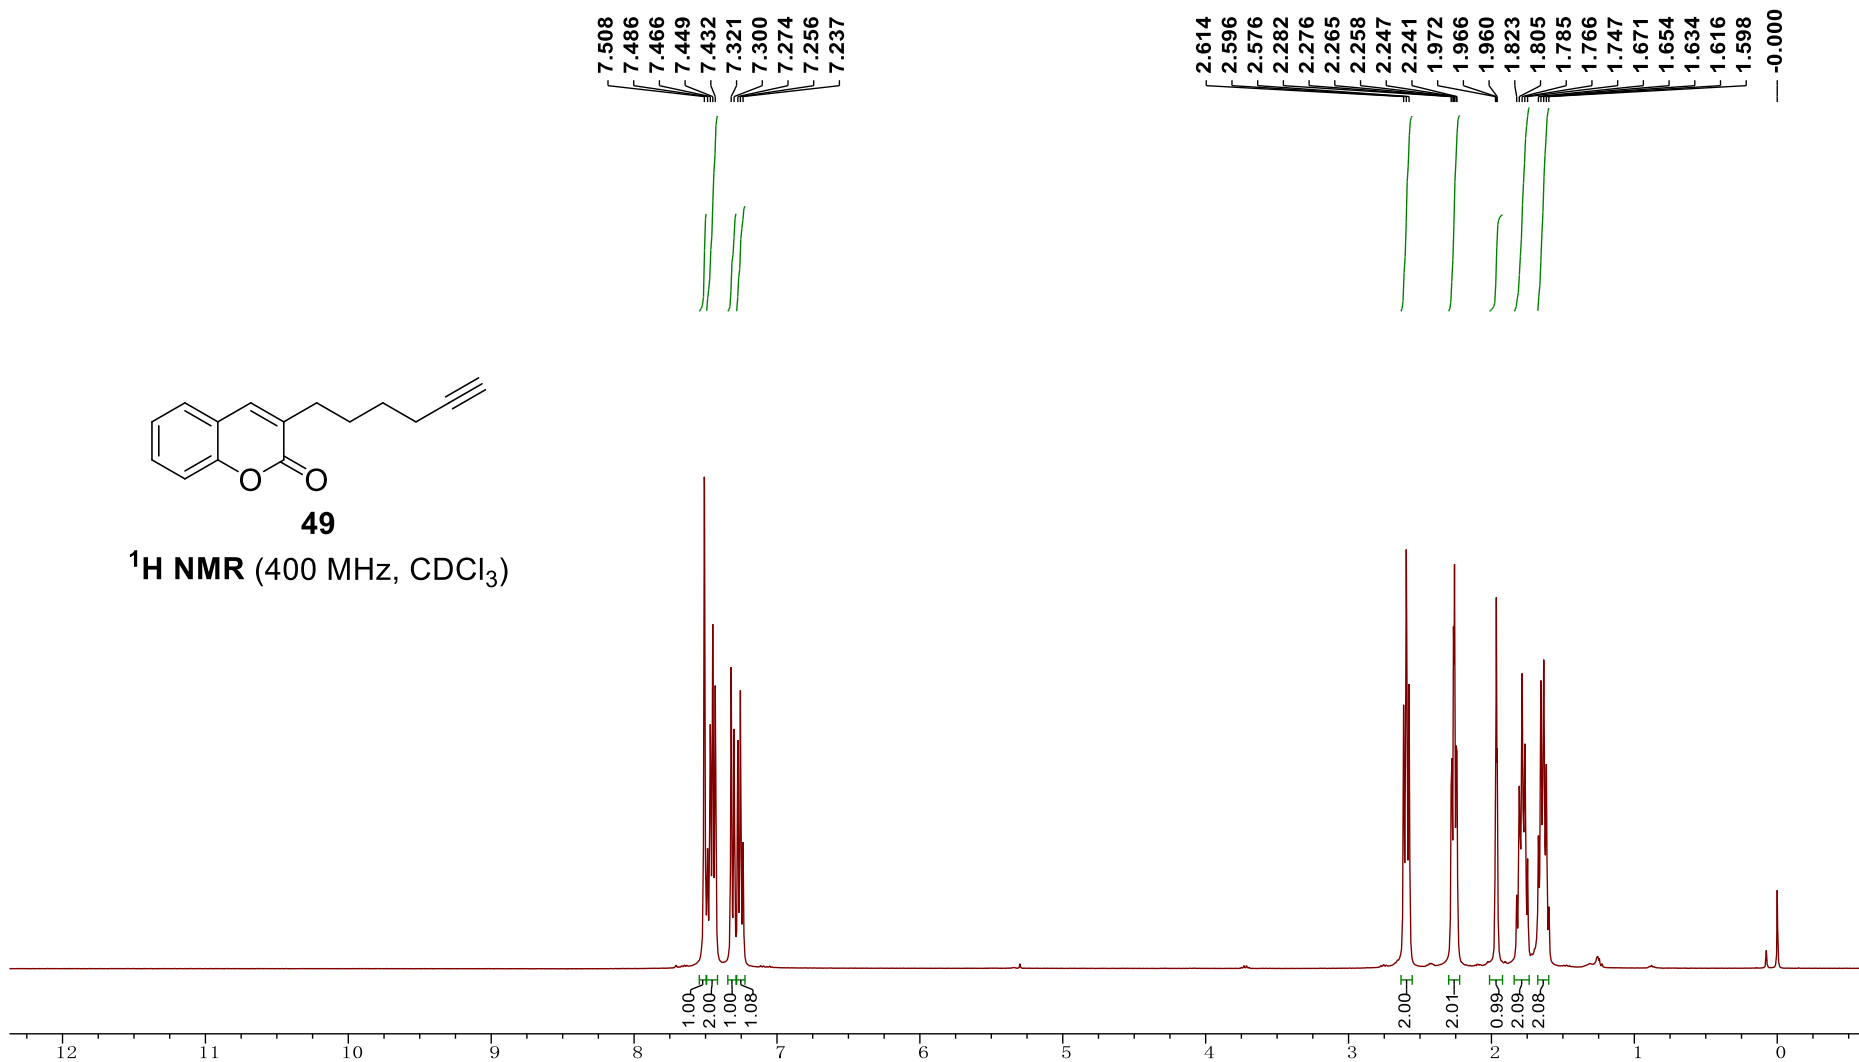

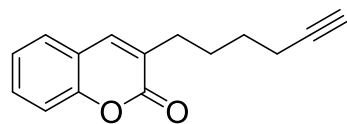

**49**

**<sup>13</sup>C NMR (101 MHz, CDCl<sub>3</sub>)**

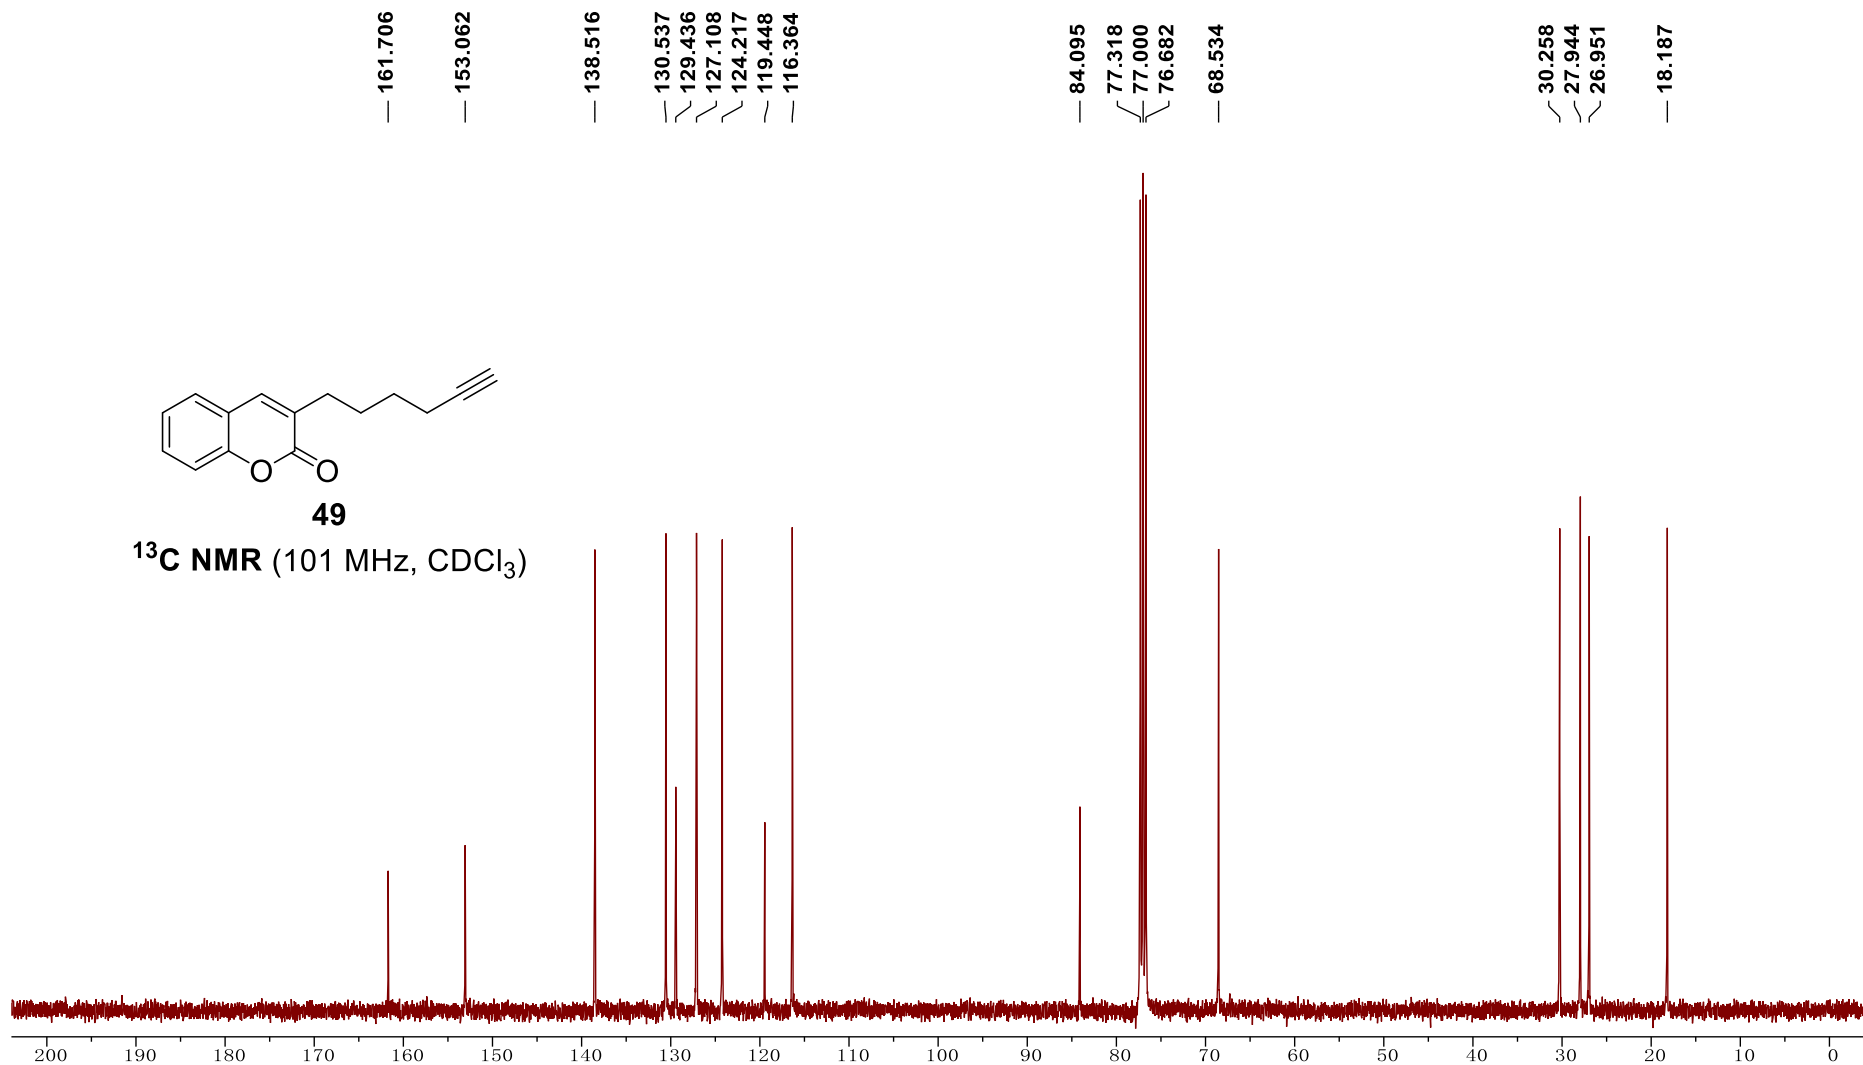

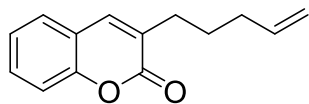

**50**

<sup>1</sup>H NMR (400 MHz, CDCl<sub>3</sub>)

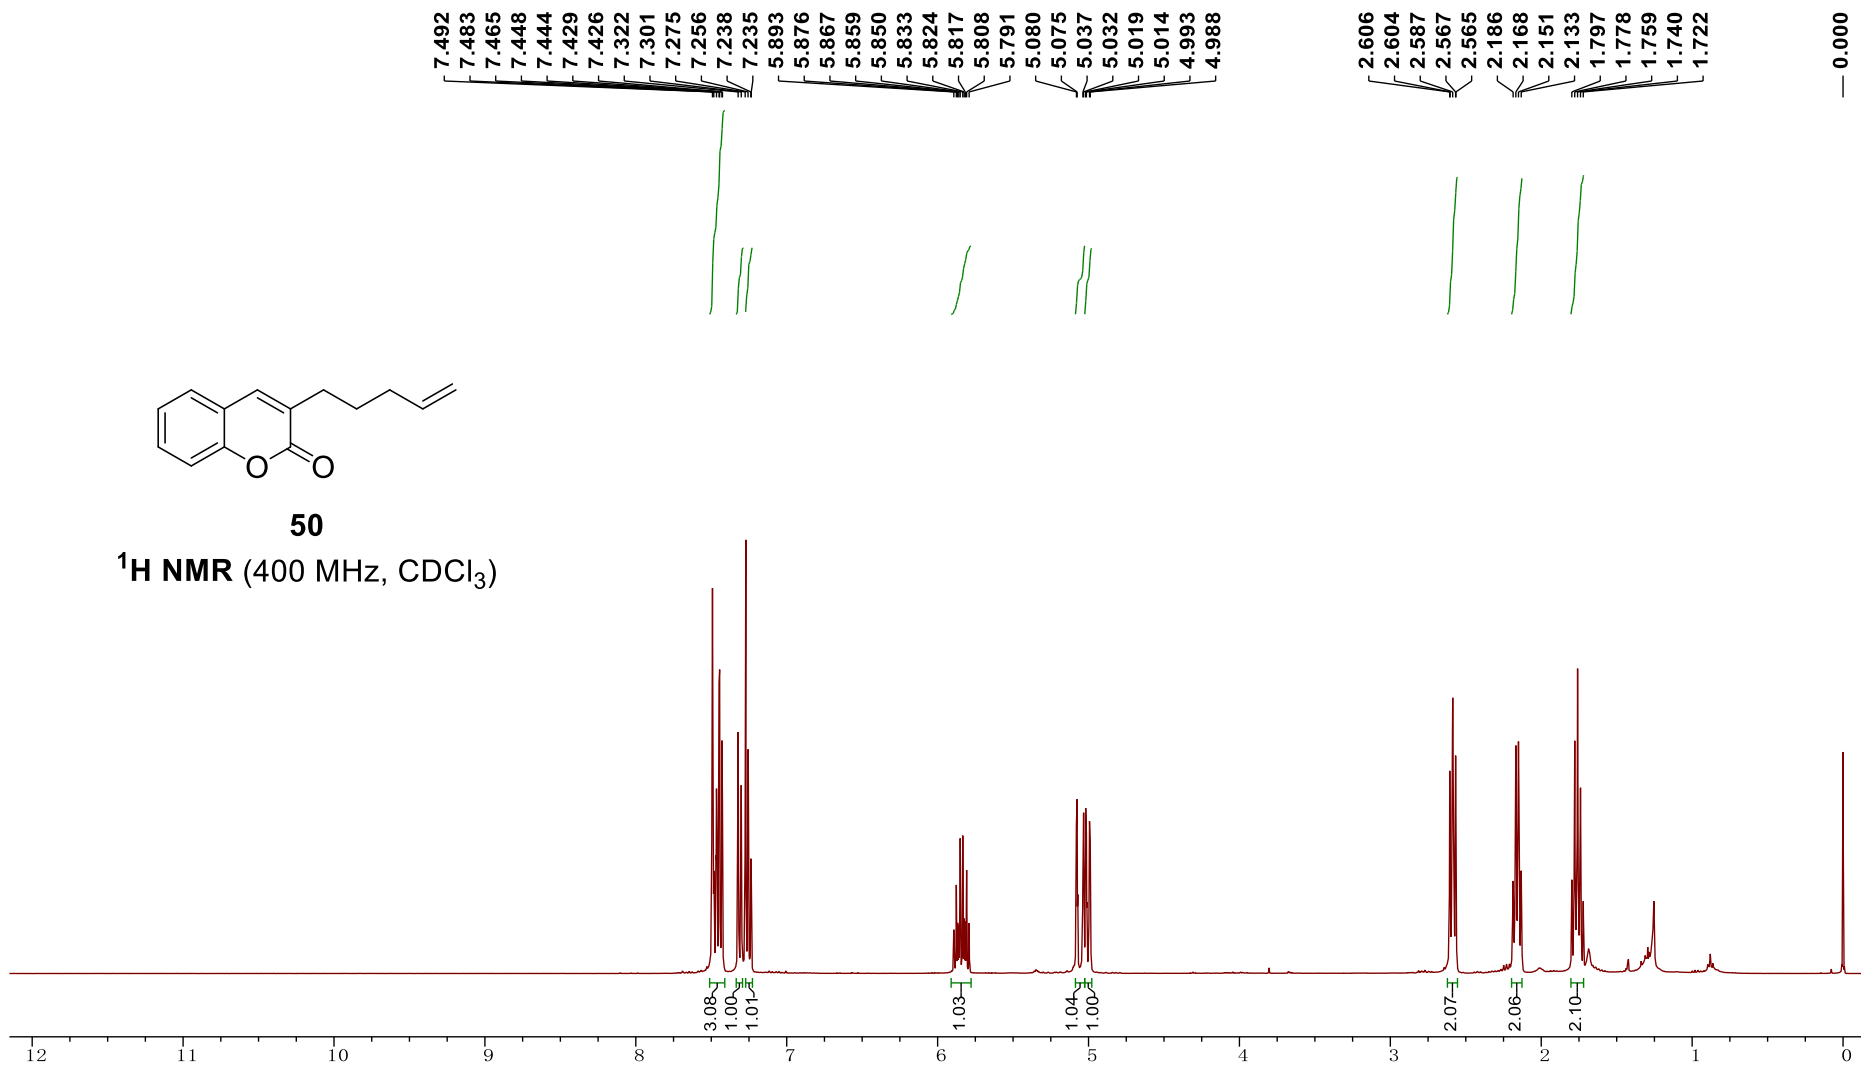

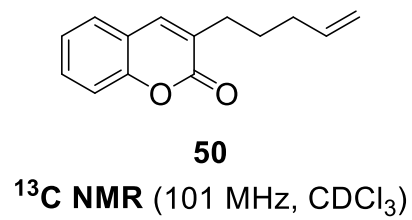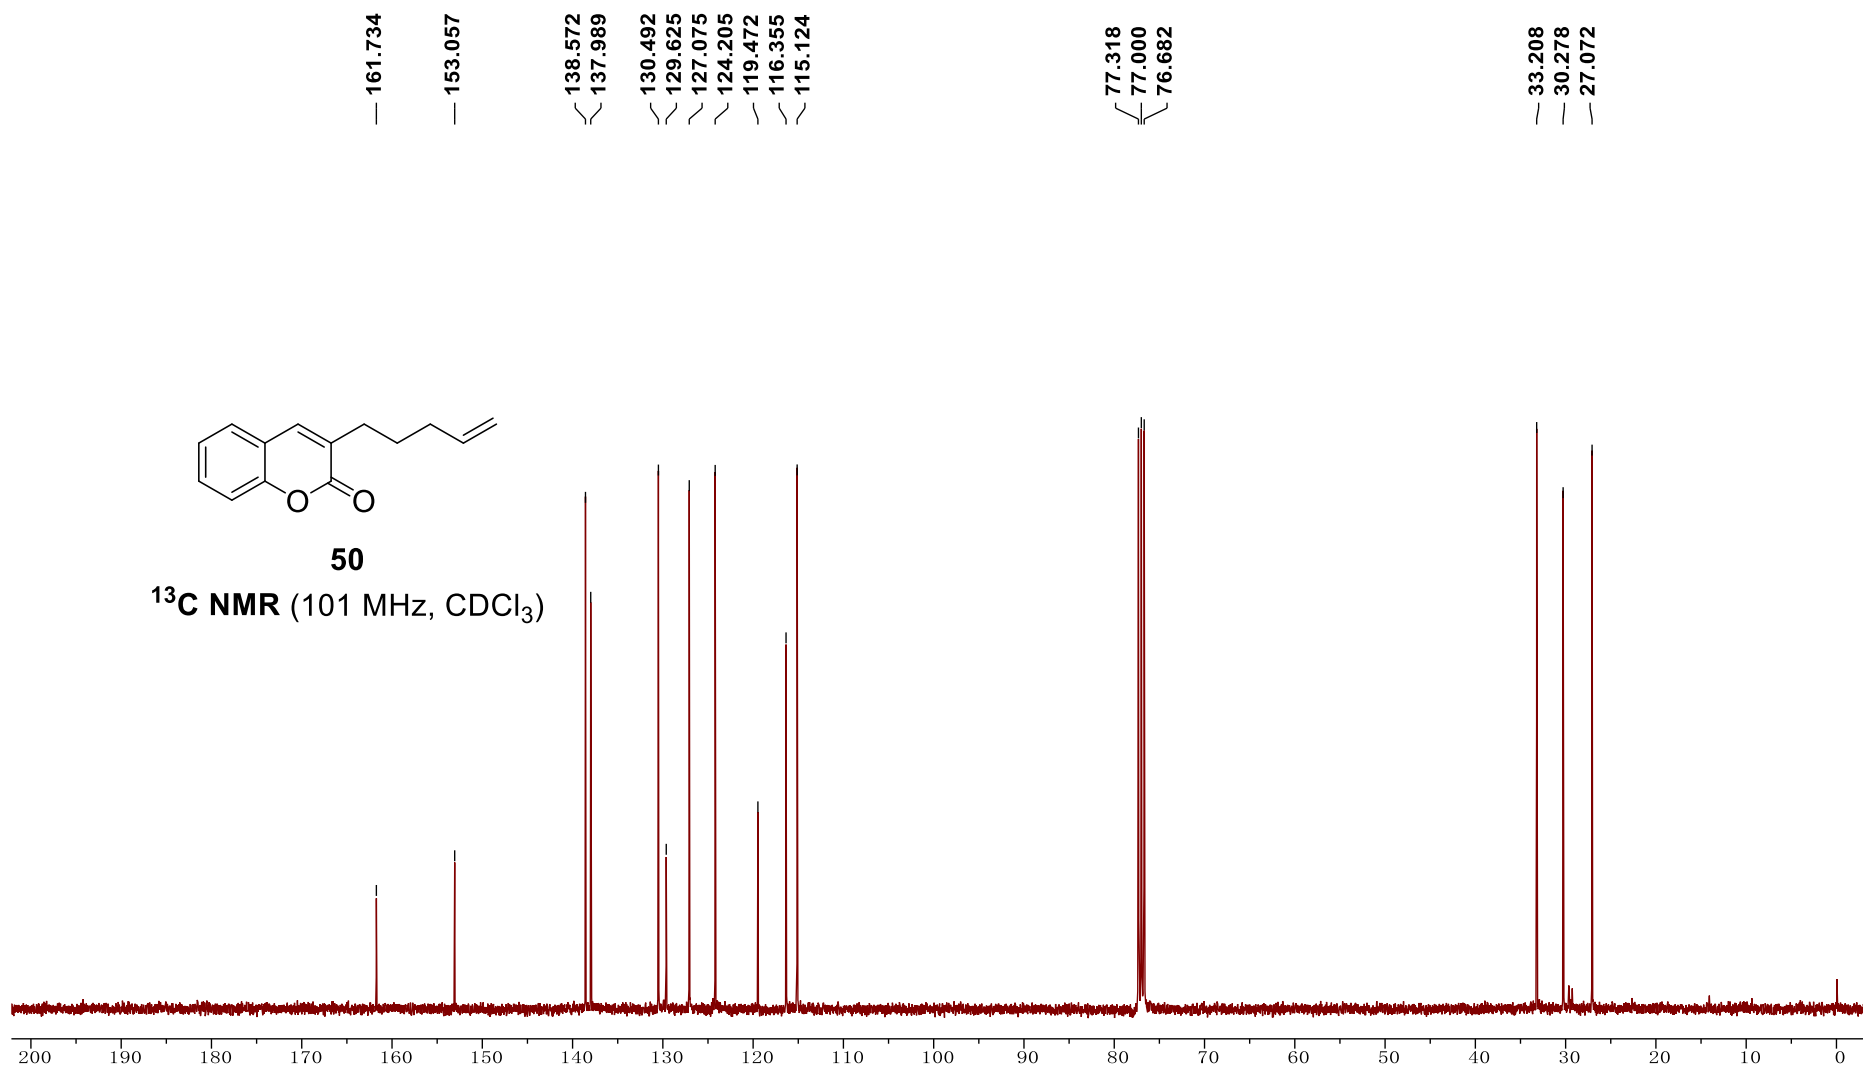

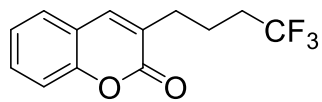

**51**

**<sup>1</sup>H NMR (400 MHz, CDCl<sub>3</sub>)**

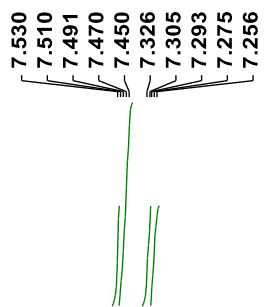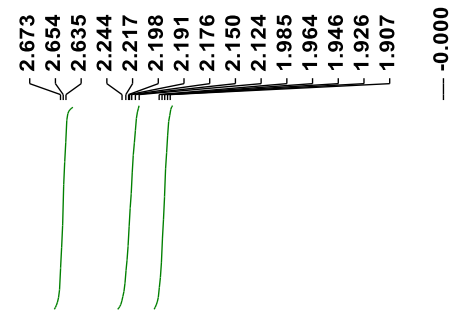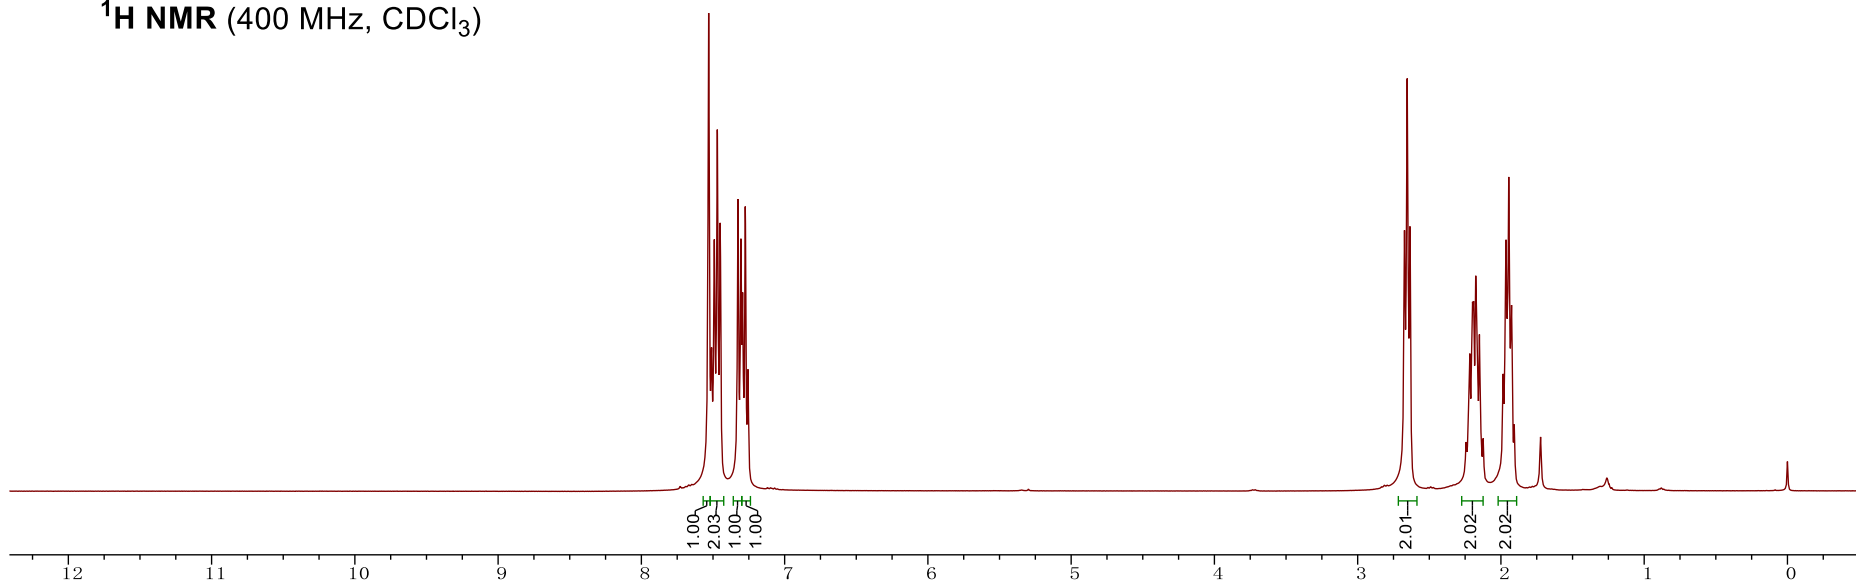

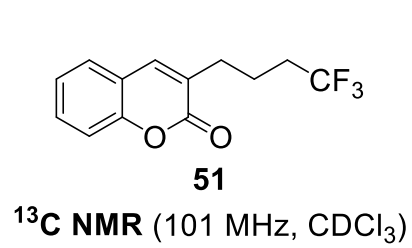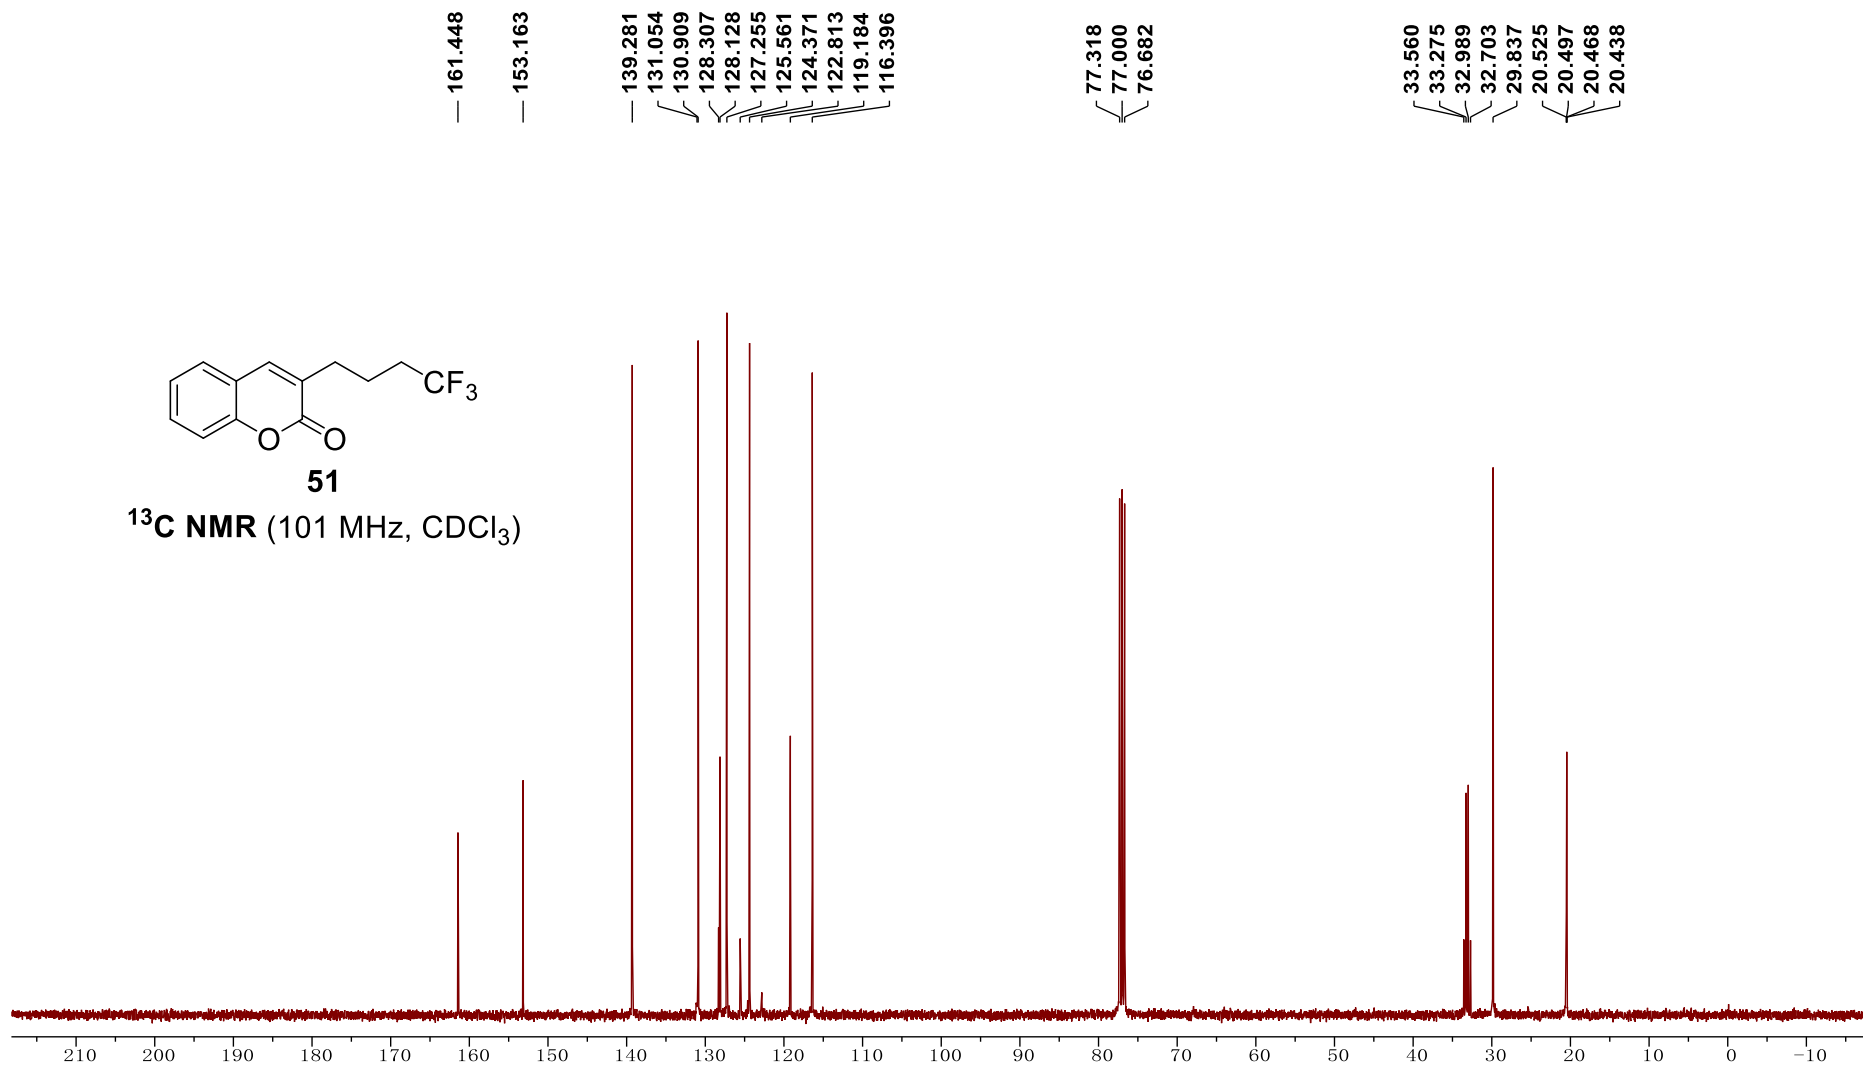

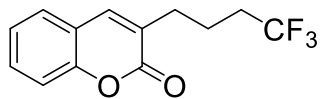

**51**

**<sup>19</sup>F NMR (376 MHz, CDCl<sub>3</sub>)**

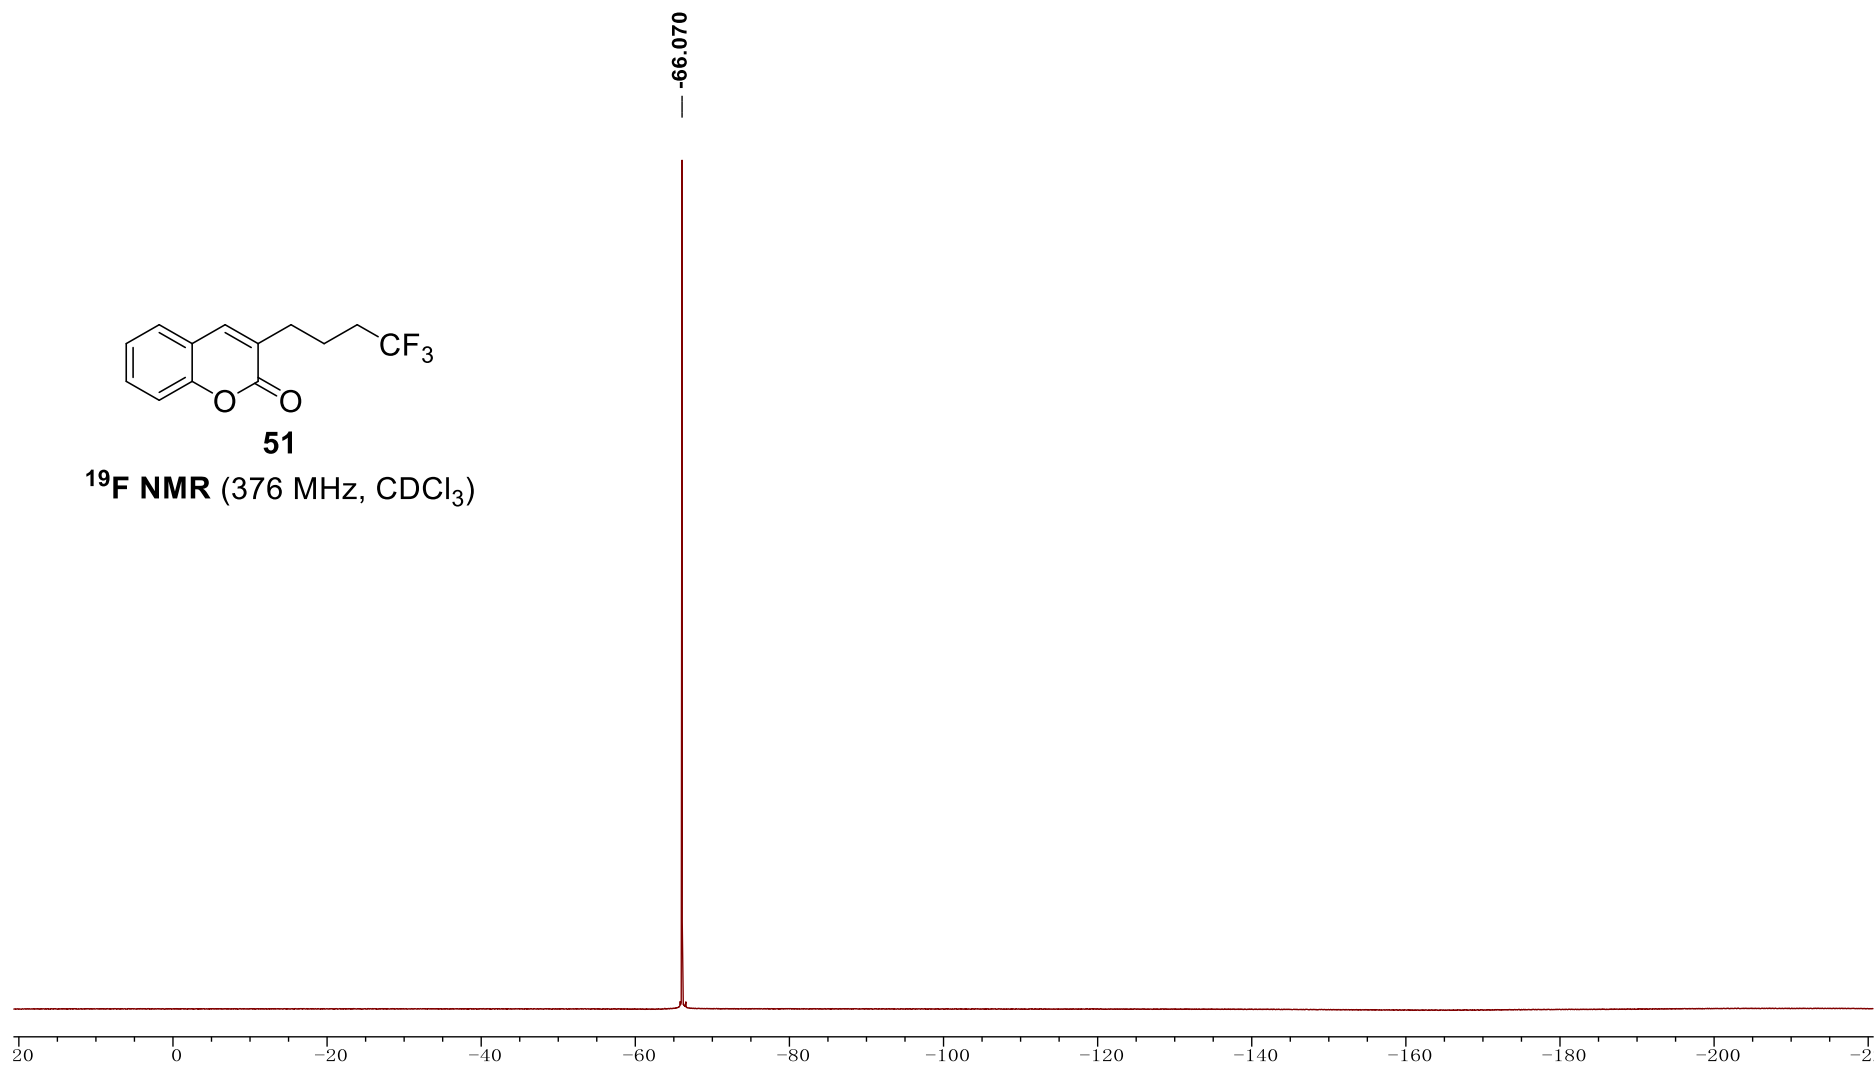

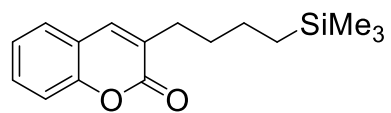

**52**

**<sup>1</sup>H NMR (400 MHz, CDCl<sub>3</sub>)**

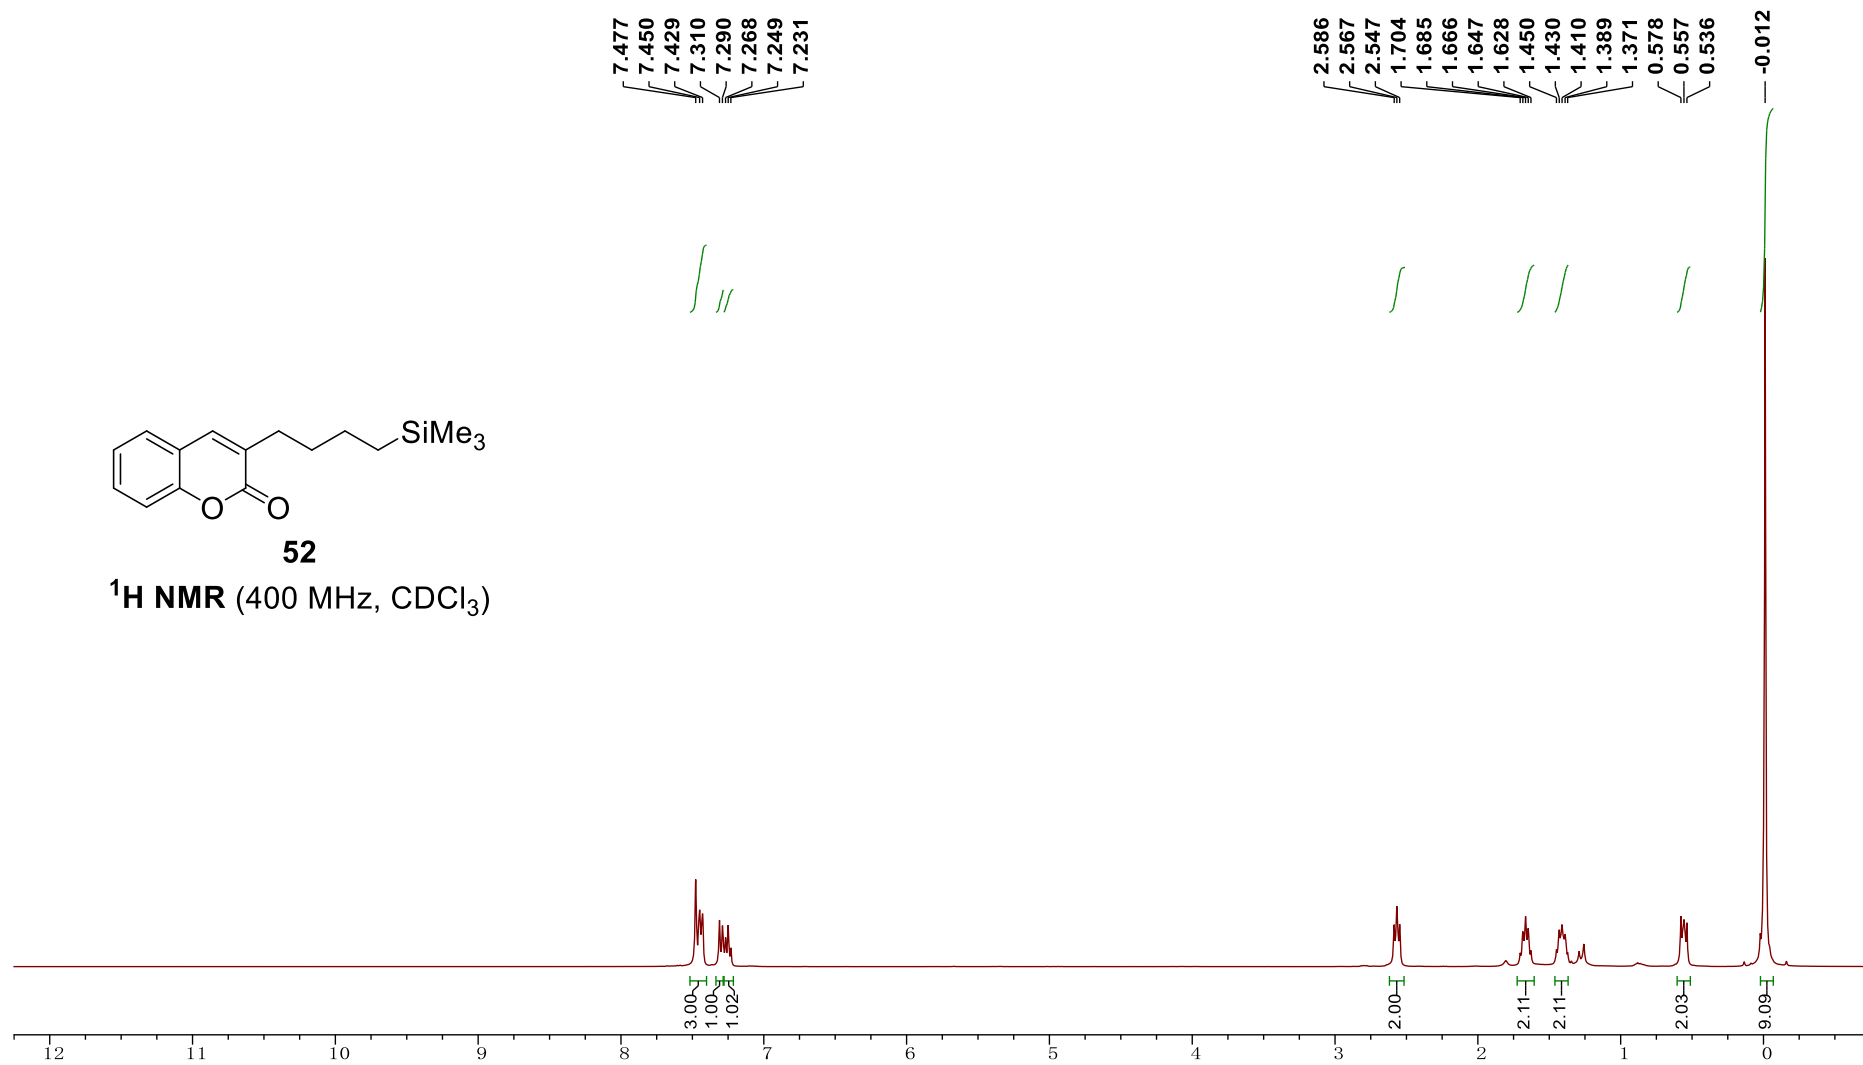



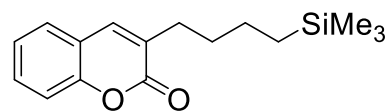

**52**

**<sup>13</sup>C NMR (101 MHz, CDCl<sub>3</sub>)**

— 161.766  
— 152.966  
— 138.188  
— 130.334  
— 129.985  
— 127.016  
— 124.131  
— 119.510  
— 116.271  
  
— 77.318  
— 77.000  
— 76.682  
  
— 31.757  
— 30.490  
— 23.633  
— 16.385  
  
— -1.739

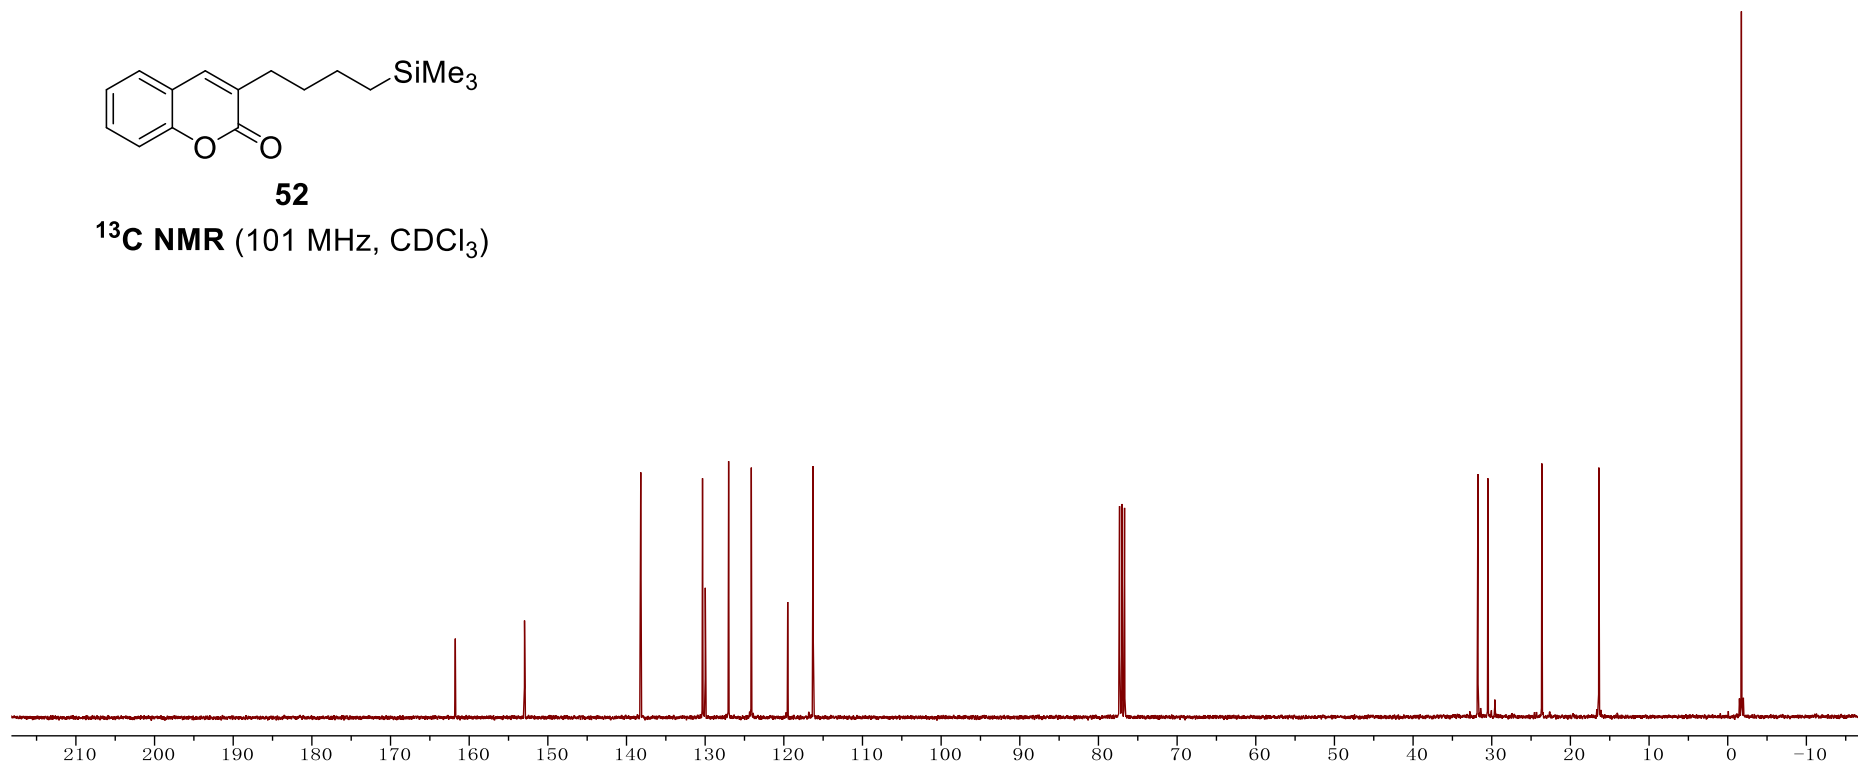

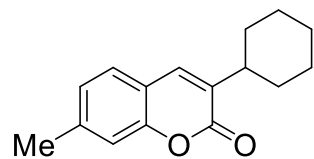

**53**

**<sup>1</sup>H NMR (400 MHz, CDCl<sub>3</sub>)**

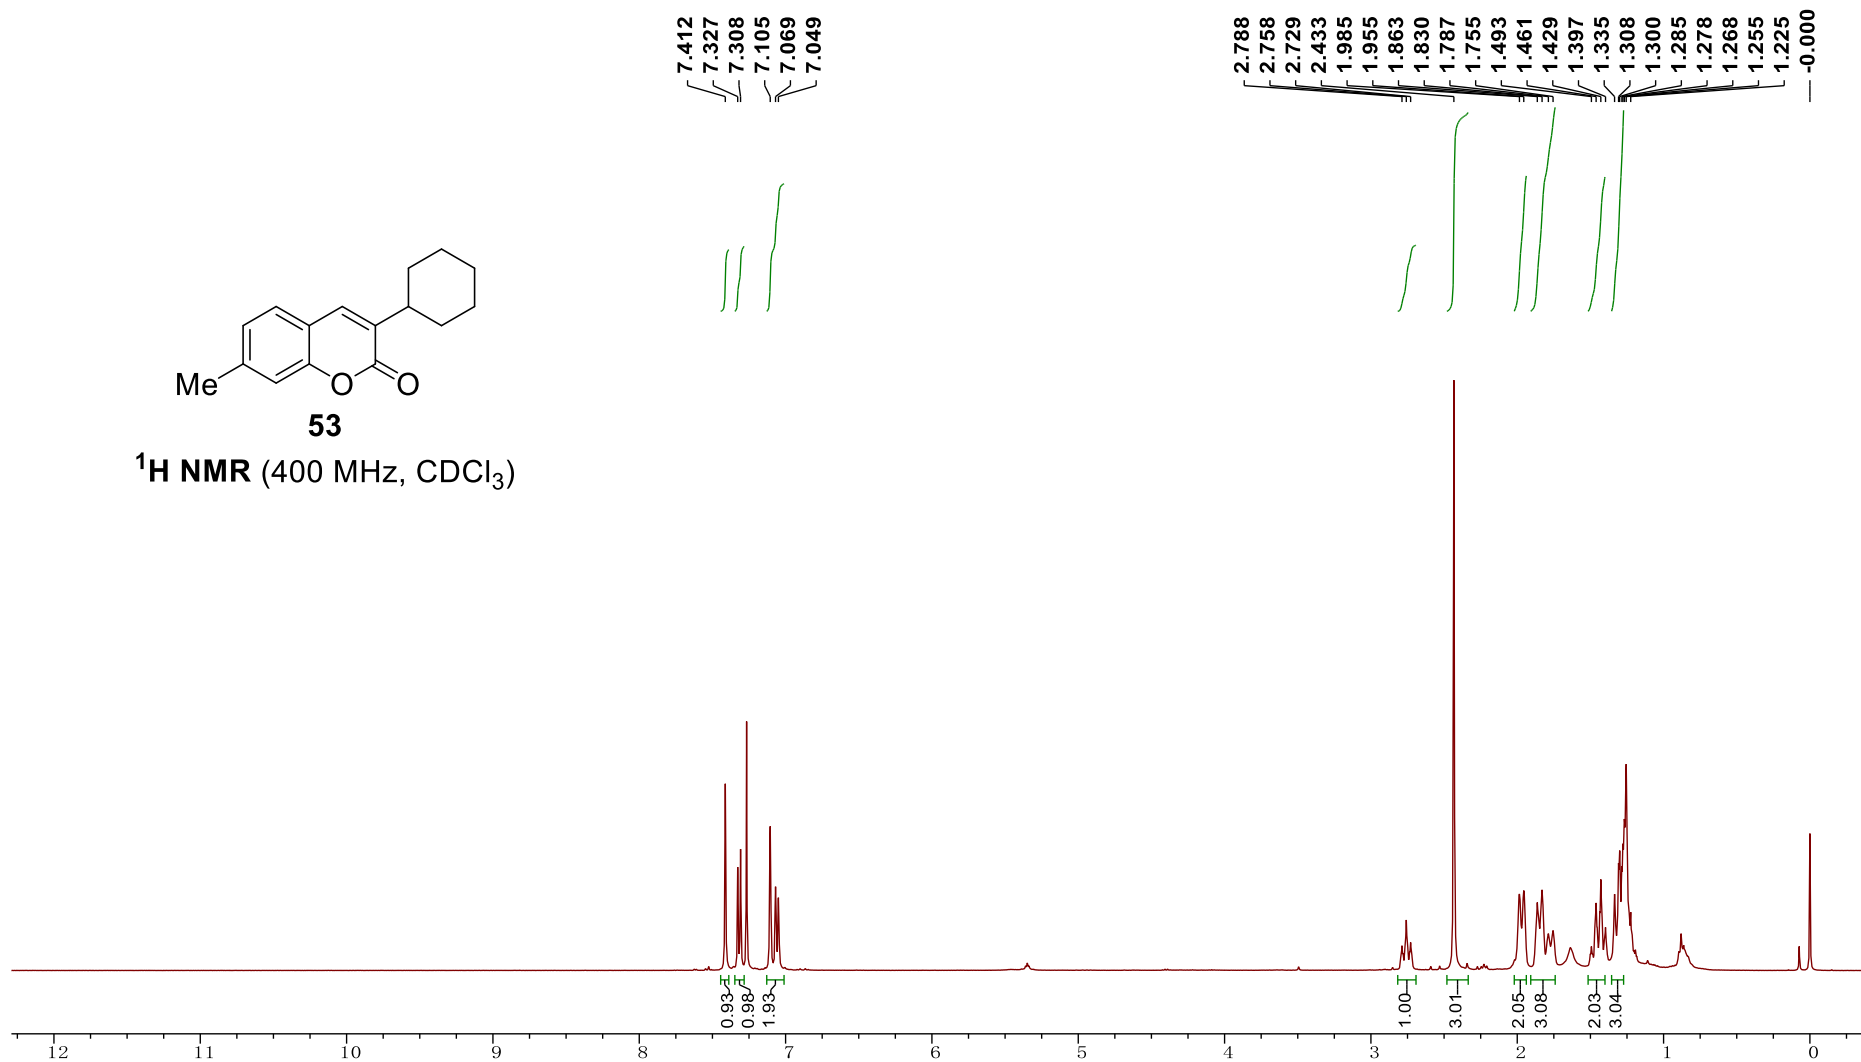

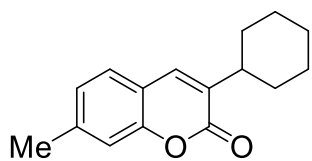

**53**

**<sup>13</sup>C NMR (101 MHz, CDCl<sub>3</sub>)**

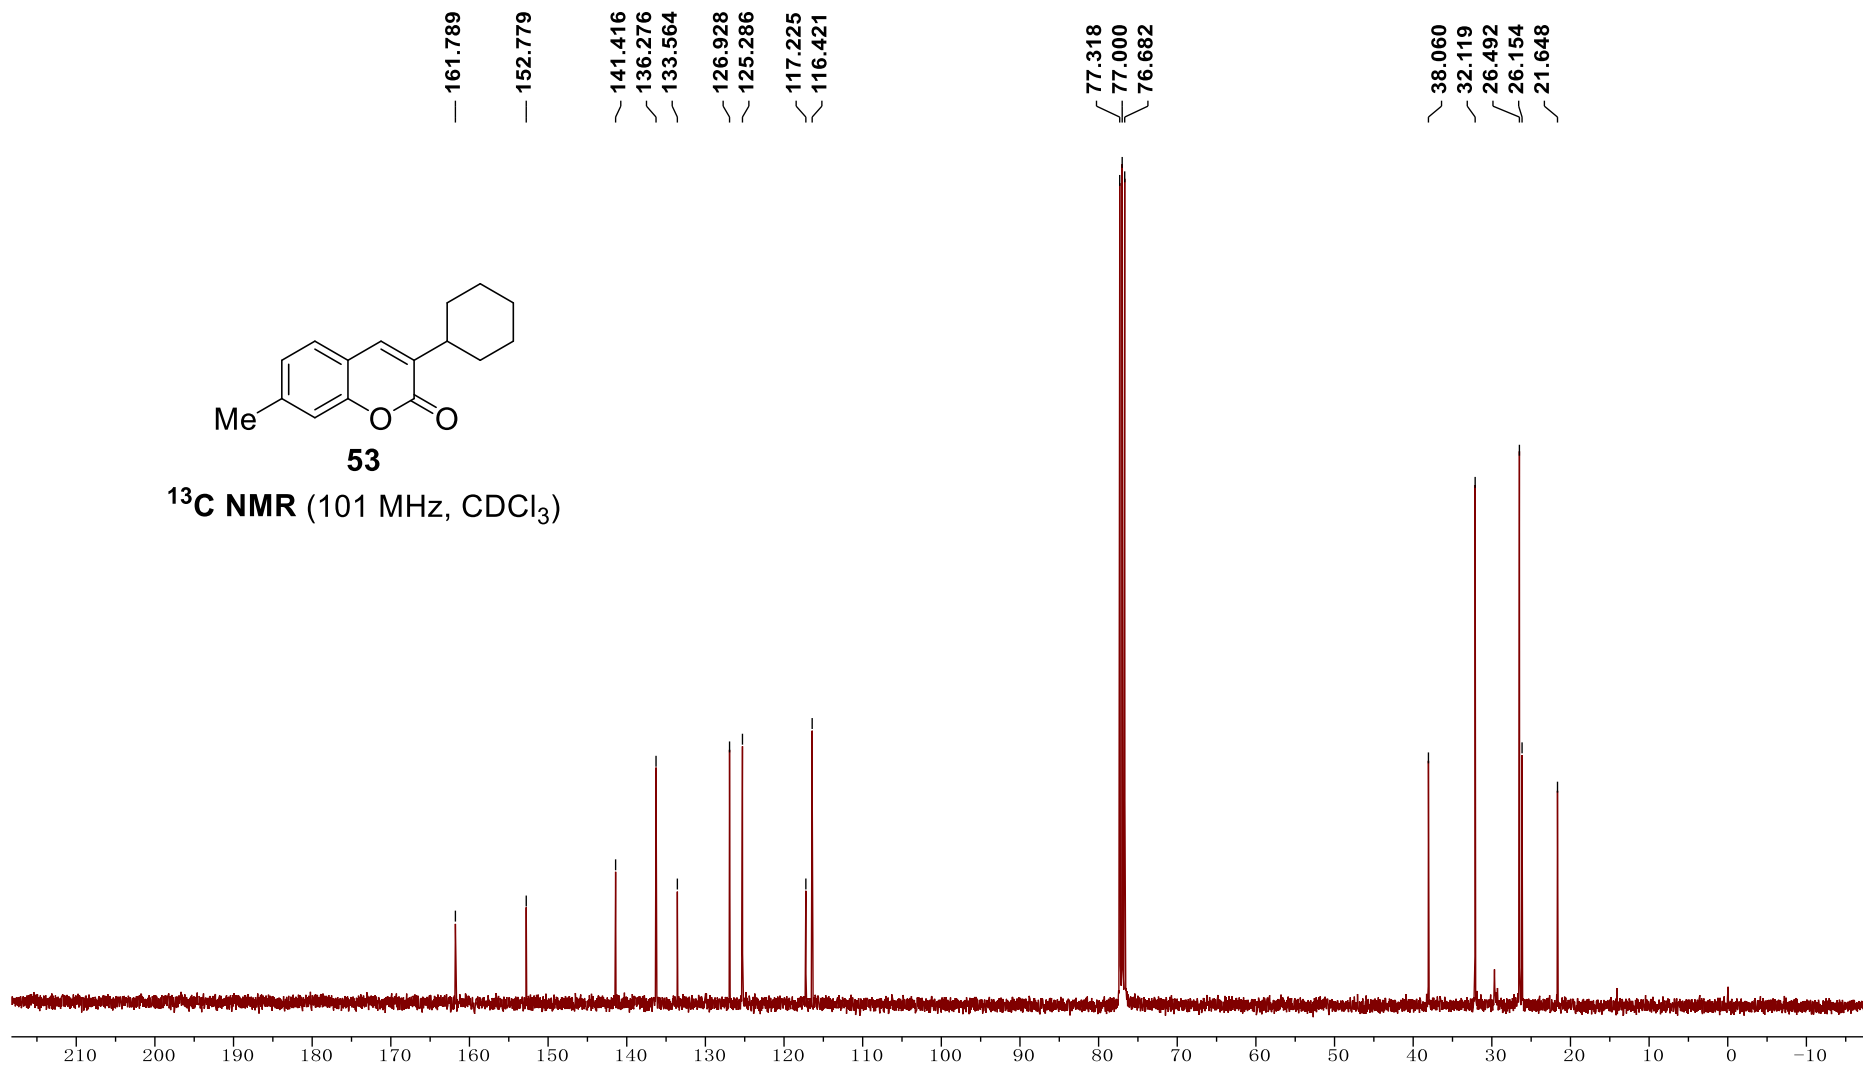

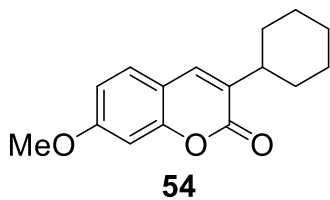

<sup>1</sup>H NMR (400 MHz, CDCl<sub>3</sub>)

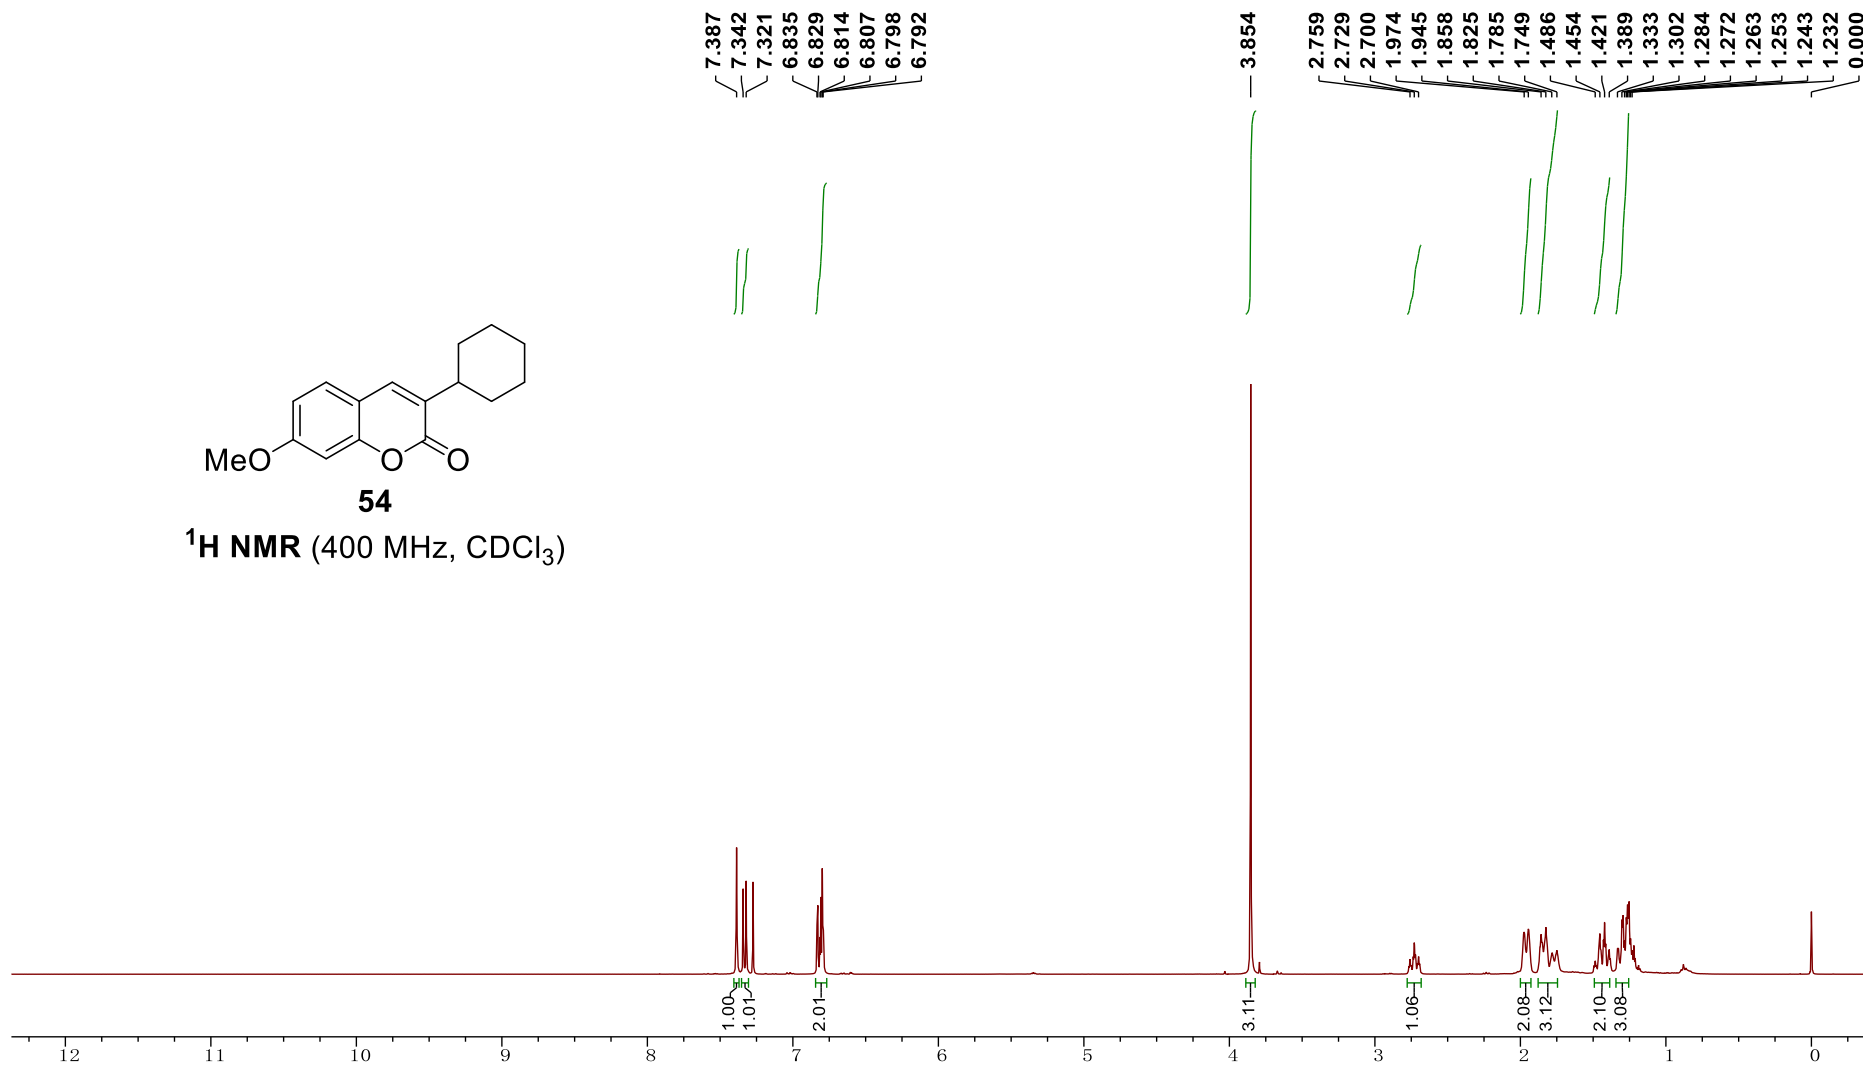

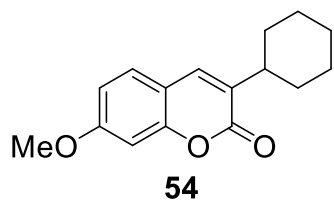

<sup>13</sup>C NMR (101 MHz, CDCl<sub>3</sub>)

161.843  
161.698  
— 154.300

136.378  
131.255  
128.114

113.258  
112.194

— 100.296

77.318  
77.000  
76.682

— 55.638

— 37.967  
— 32.134  
26.500  
26.148

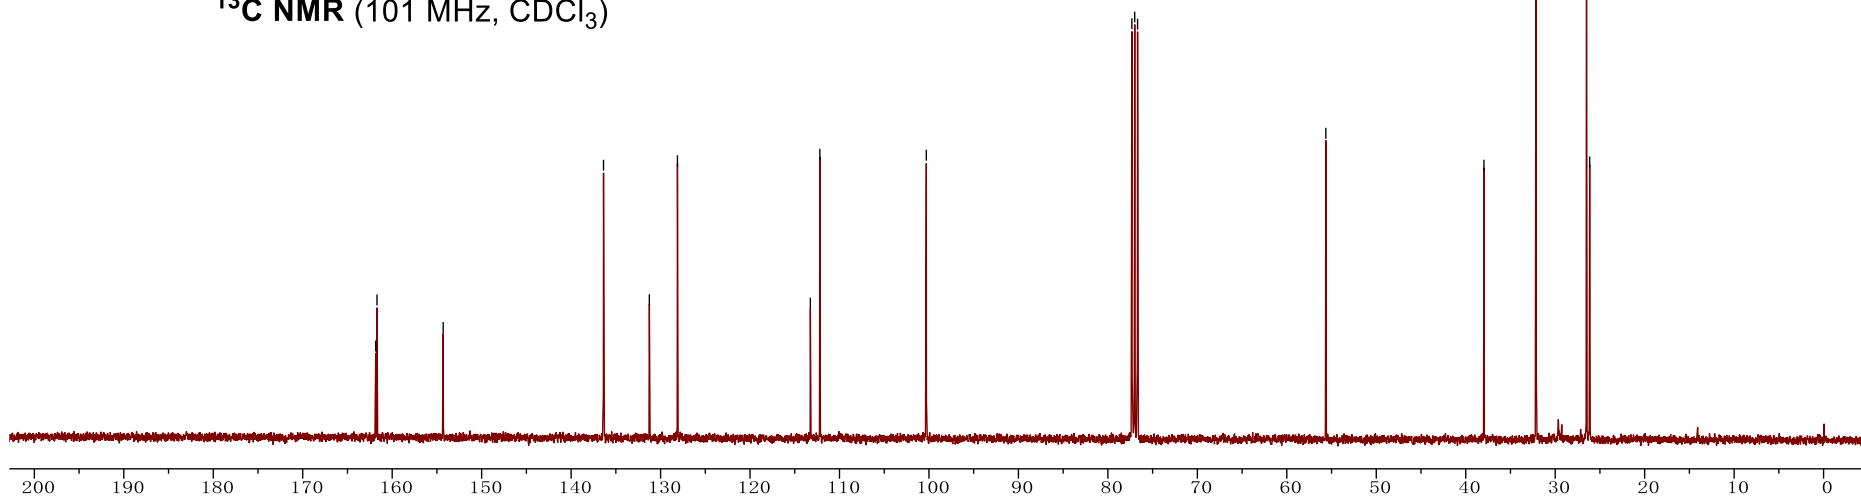

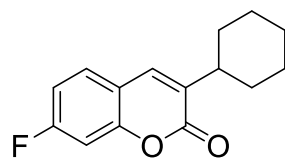

55

$^1\text{H NMR}$  (400 MHz,  $\text{CDCl}_3$ )

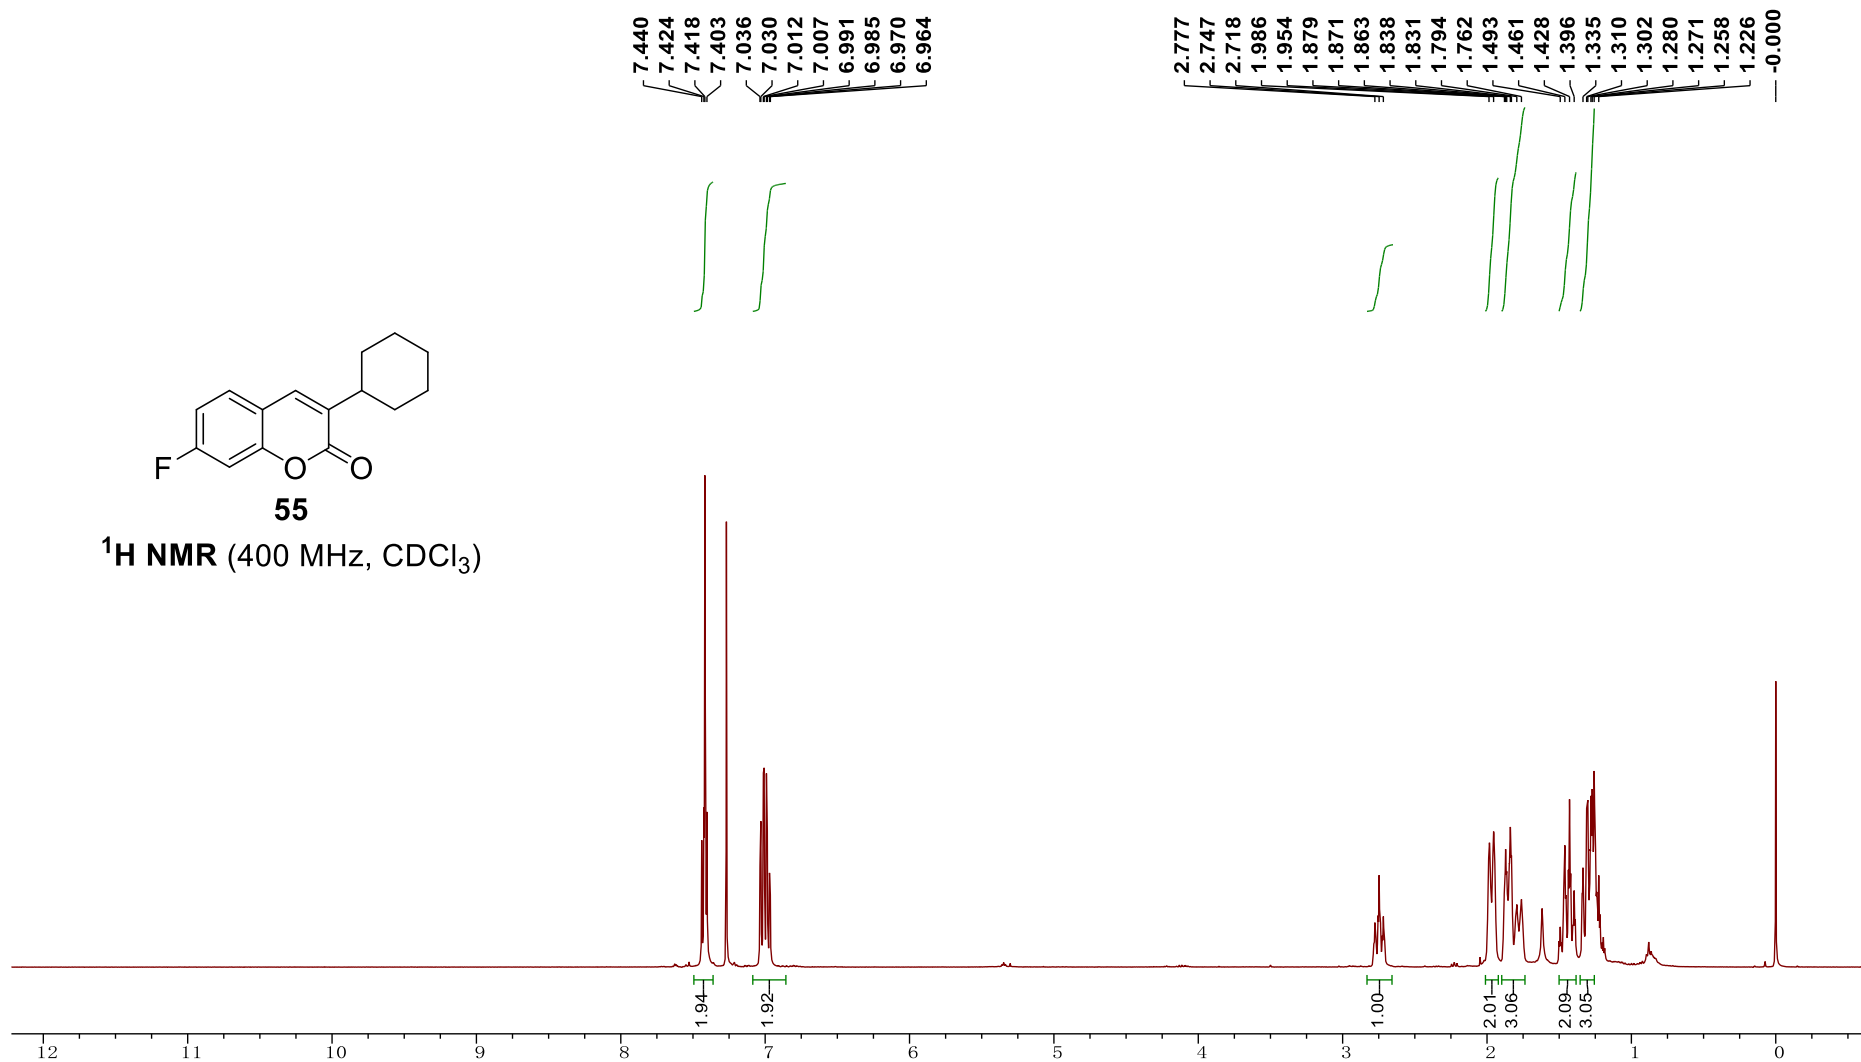

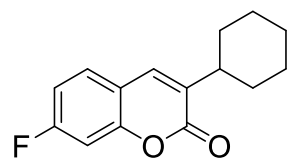

**55**

**<sup>13</sup>C NMR (101 MHz, CDCl<sub>3</sub>)**

164.849  
162.344  
161.097  
153.751  
153.623

135.759  
135.748  
133.609  
133.578  
128.730  
128.629

116.334  
116.306  
112.289  
112.062  
103.980  
103.726

77.318  
77.000  
76.682

38.144  
32.046  
26.450  
26.107

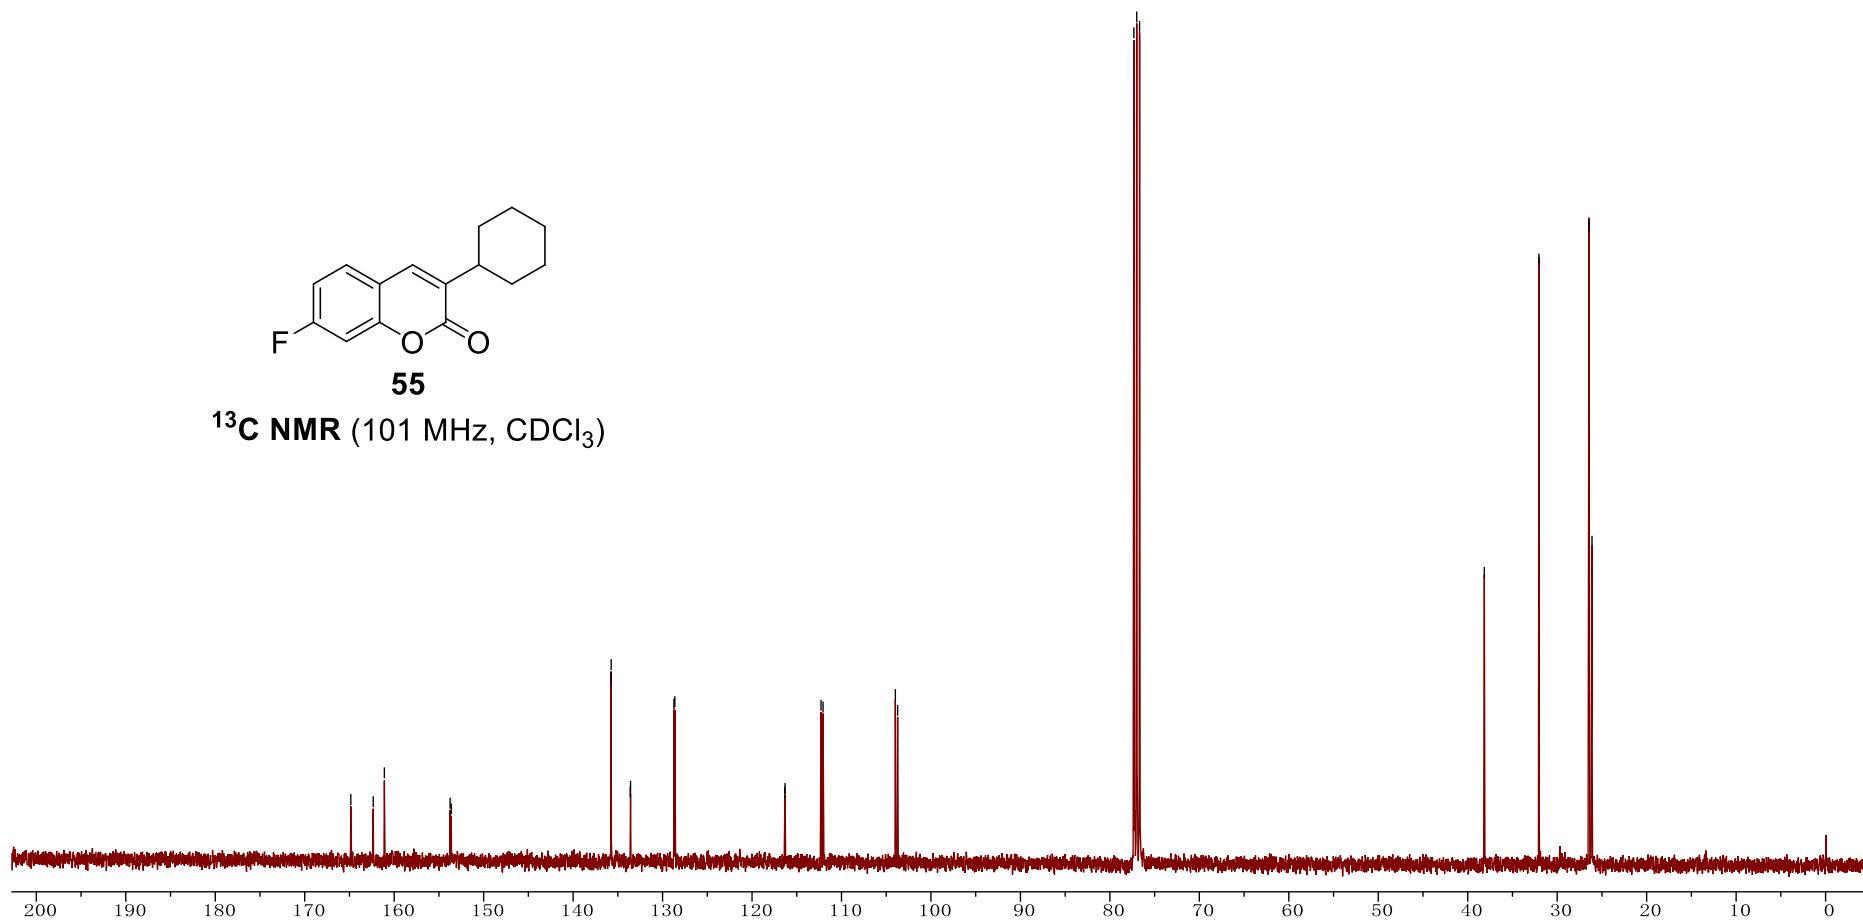

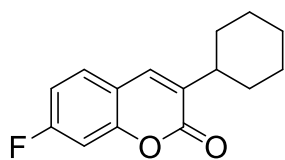

**55**

**<sup>19</sup>F NMR (282 MHz, CDCl<sub>3</sub>)**

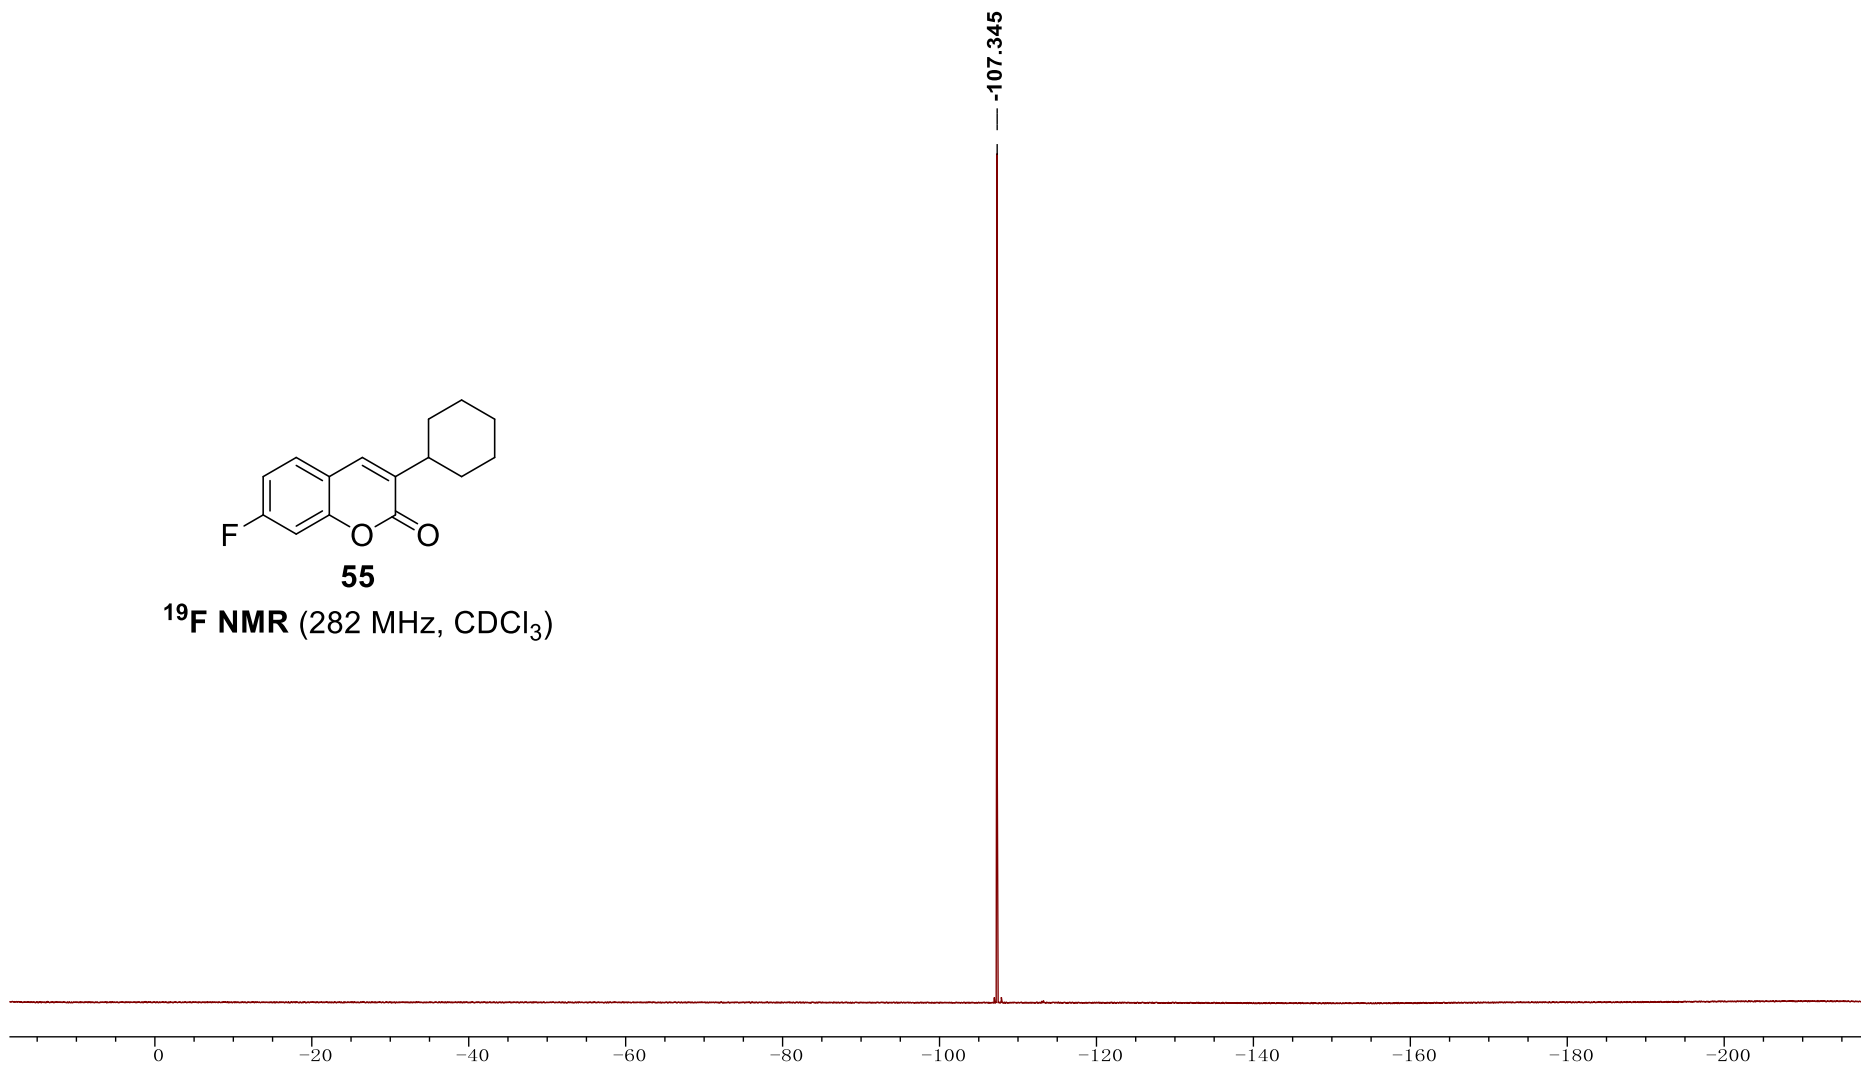



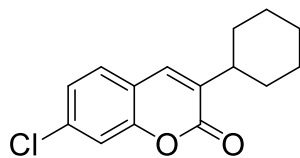

**56**

<sup>1</sup>H NMR (400 MHz, CDCl<sub>3</sub>)

7.410  
7.384  
7.363  
7.293  
7.290  
7.231  
7.226  
7.210  
7.206

2.777  
2.748  
2.719  
1.982  
1.952  
1.870  
1.837  
1.792  
1.760  
1.488  
1.456  
1.424  
1.392  
1.338  
1.307  
1.269  
1.255  
1.224  
-0.000

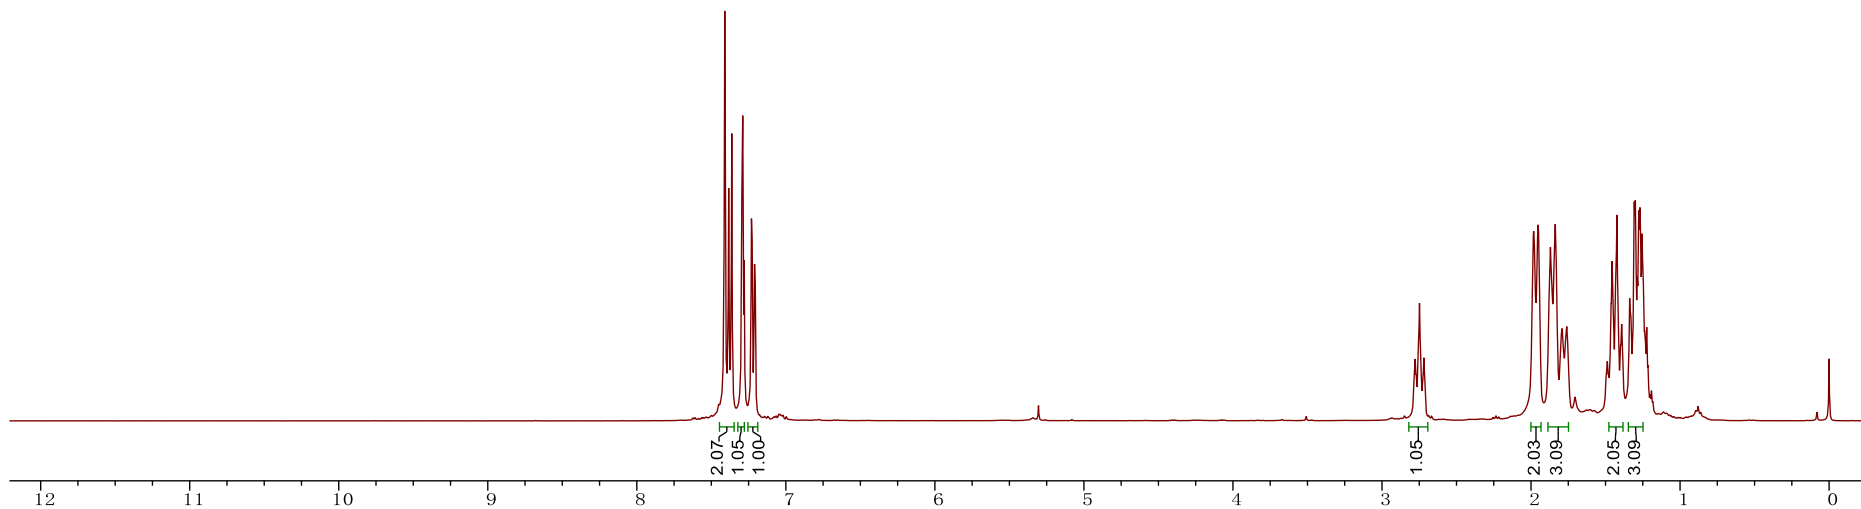

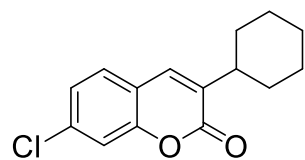

**56**

**<sup>13</sup>C NMR (101 MHz, CDCl<sub>3</sub>)**

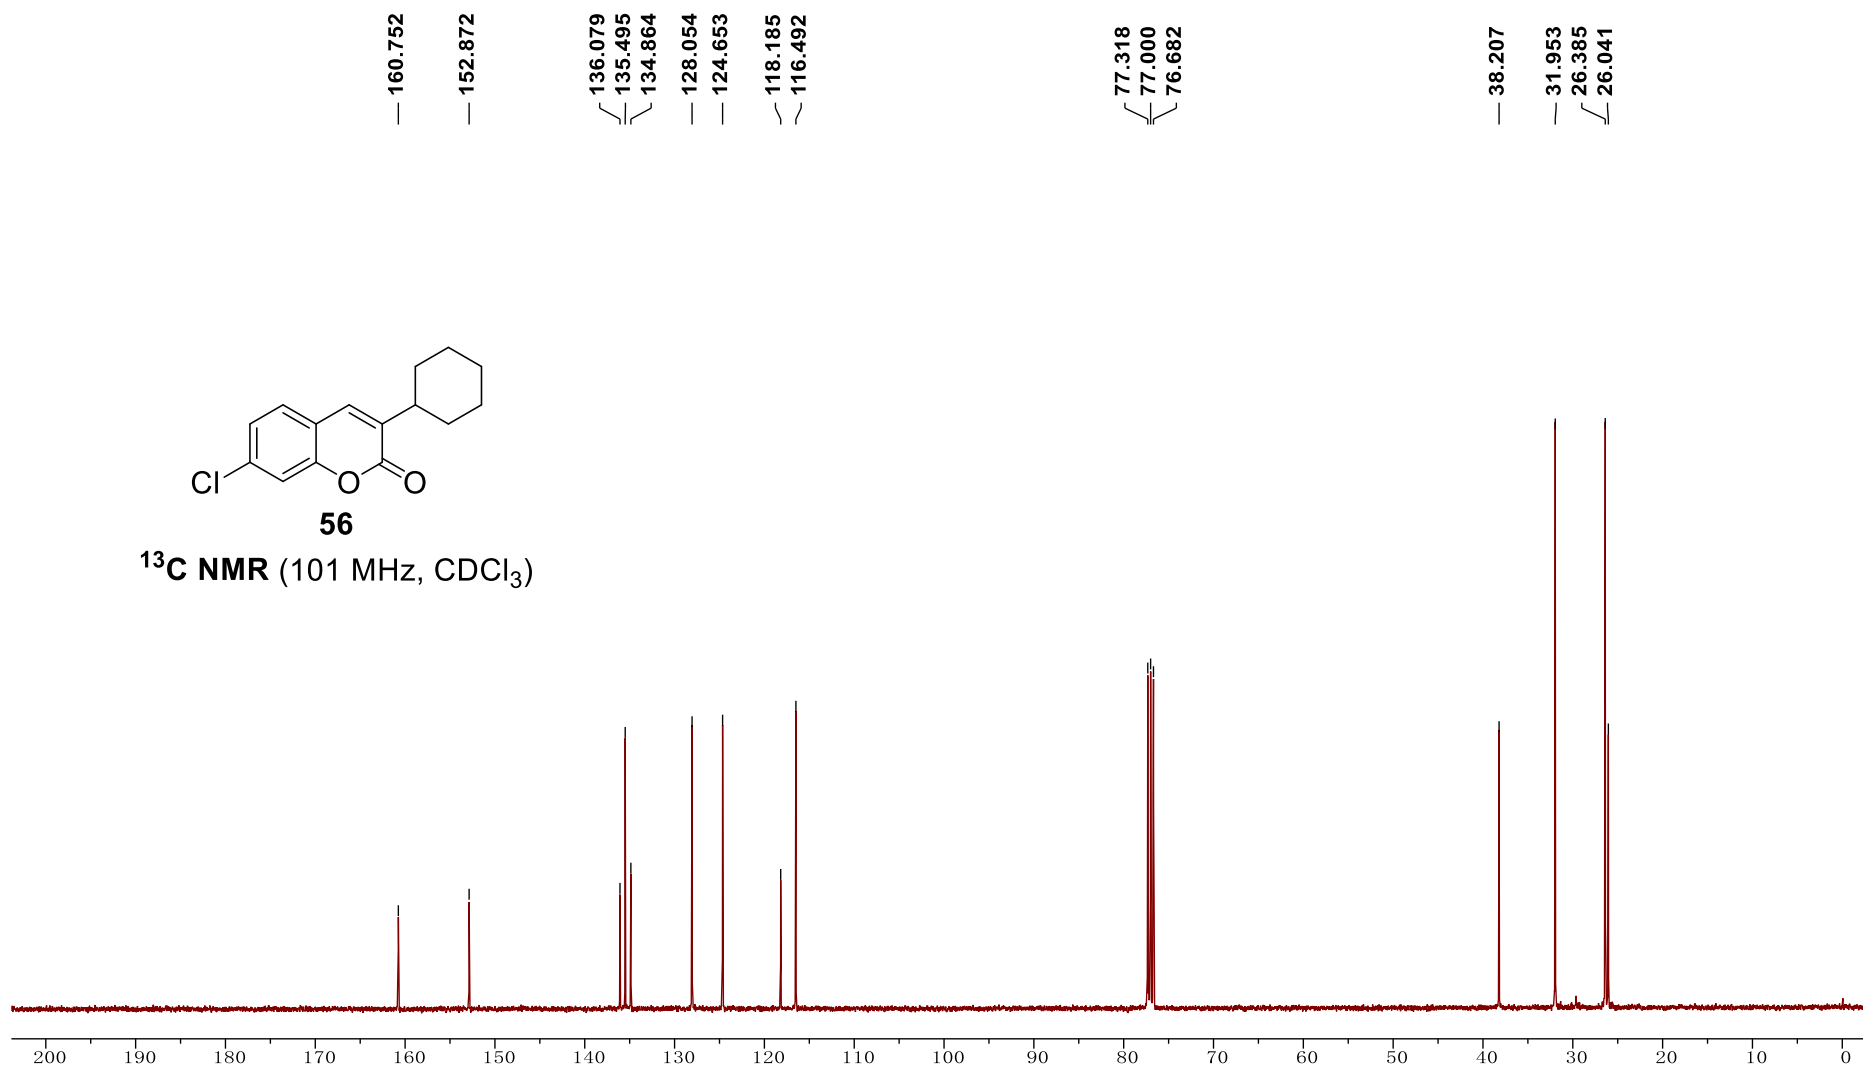

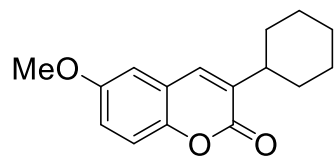

**57**

<sup>1</sup>H NMR (300 MHz, CDCl<sub>3</sub>)

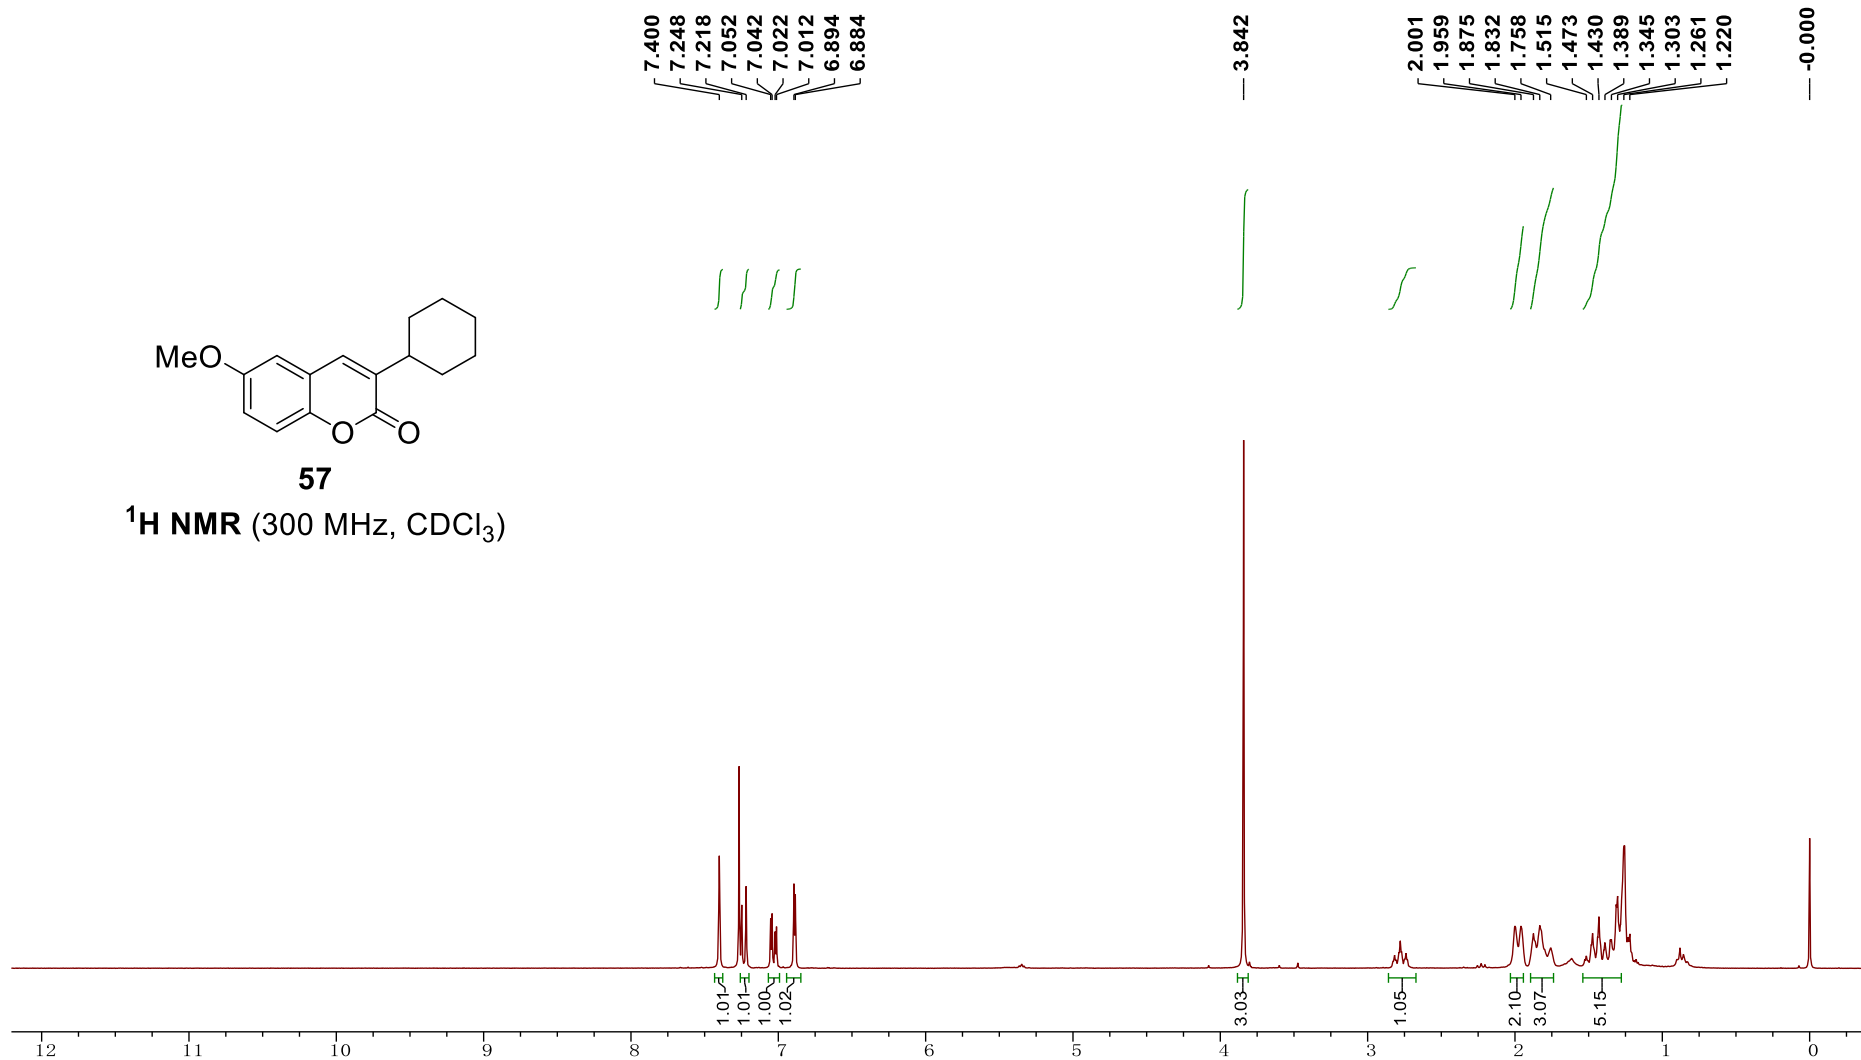

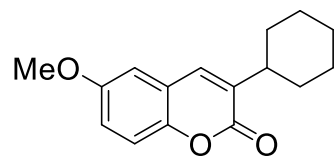

**57**

**<sup>13</sup>C NMR (101 MHz, CDCl<sub>3</sub>)**

— 161.693  
— 155.892  
— 147.127  
— 136.128  
— 135.241  
— 120.010  
— 117.978  
— 117.256  
— 109.559  
— 77.318  
— 77.000  
— 76.682  
— 55.765  
— 38.164  
— 32.131  
— 26.483  
— 26.154

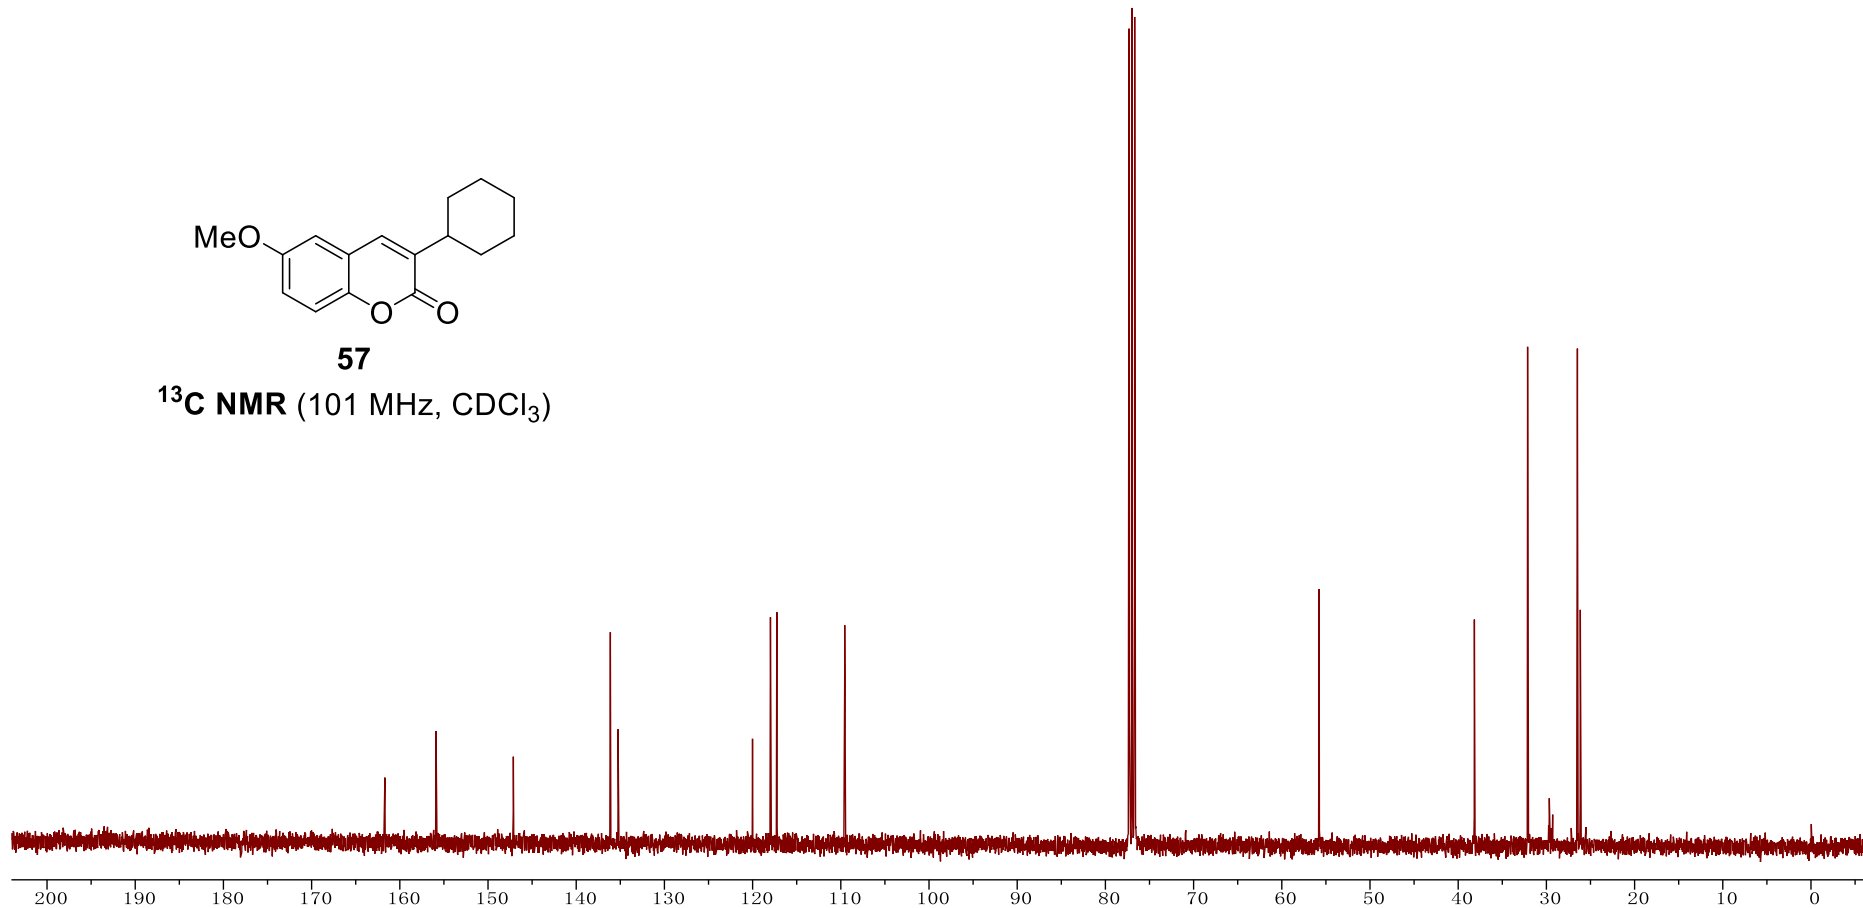

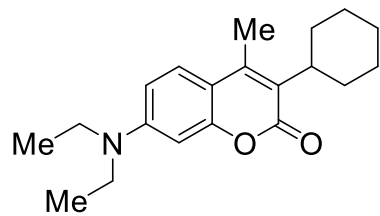

**58**

**<sup>1</sup>H NMR (400 MHz, CDCl<sub>3</sub>)**

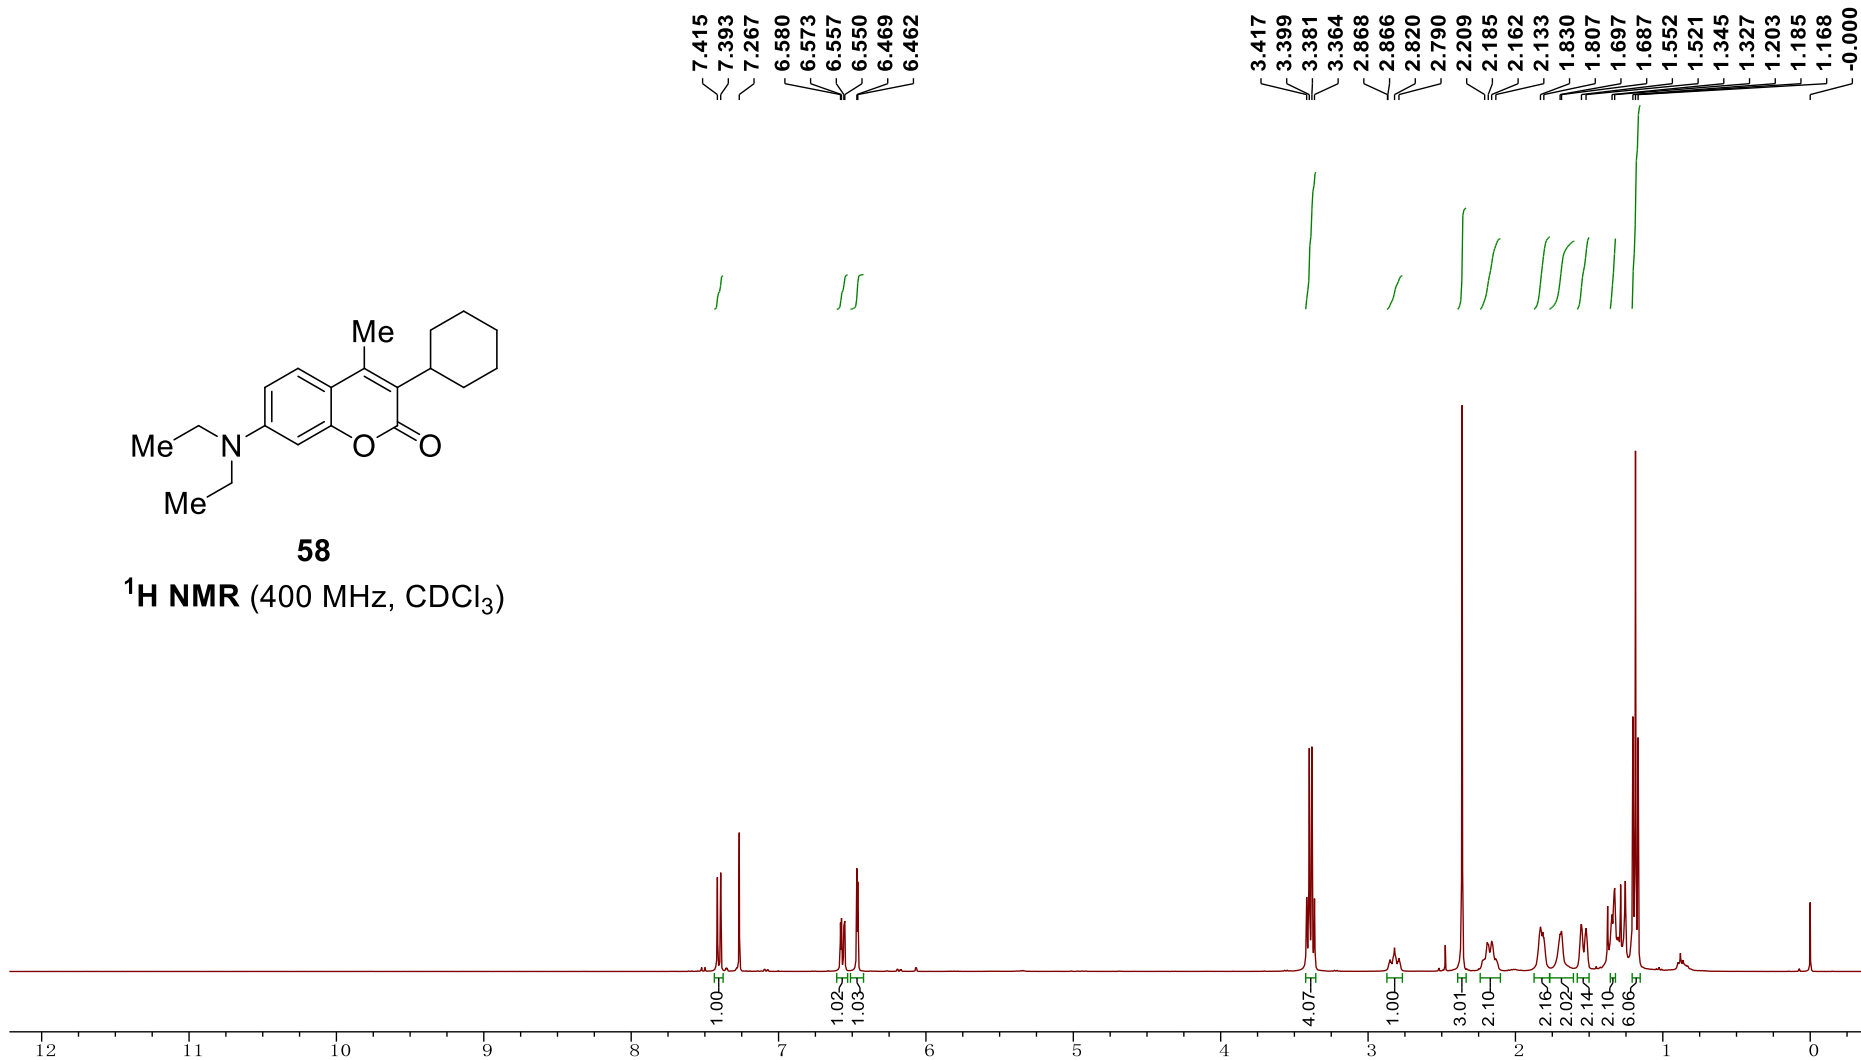

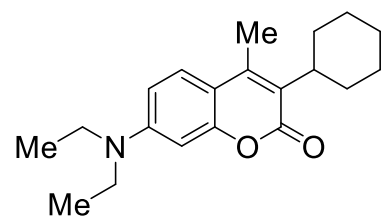

**58**

**<sup>13</sup>C NMR (101 MHz, CDCl<sub>3</sub>)**

— 161.277  
— 154.549  
— 149.324  
— 146.109  
  
— 125.578  
— 124.085  
  
— 109.847  
— 108.217  
  
— 97.264  
  
— 77.318  
— 77.000  
— 76.682  
  
— 44.611  
— 39.443  
  
— 29.414  
— 27.083  
— 25.791  
  
— 14.550  
— 12.425

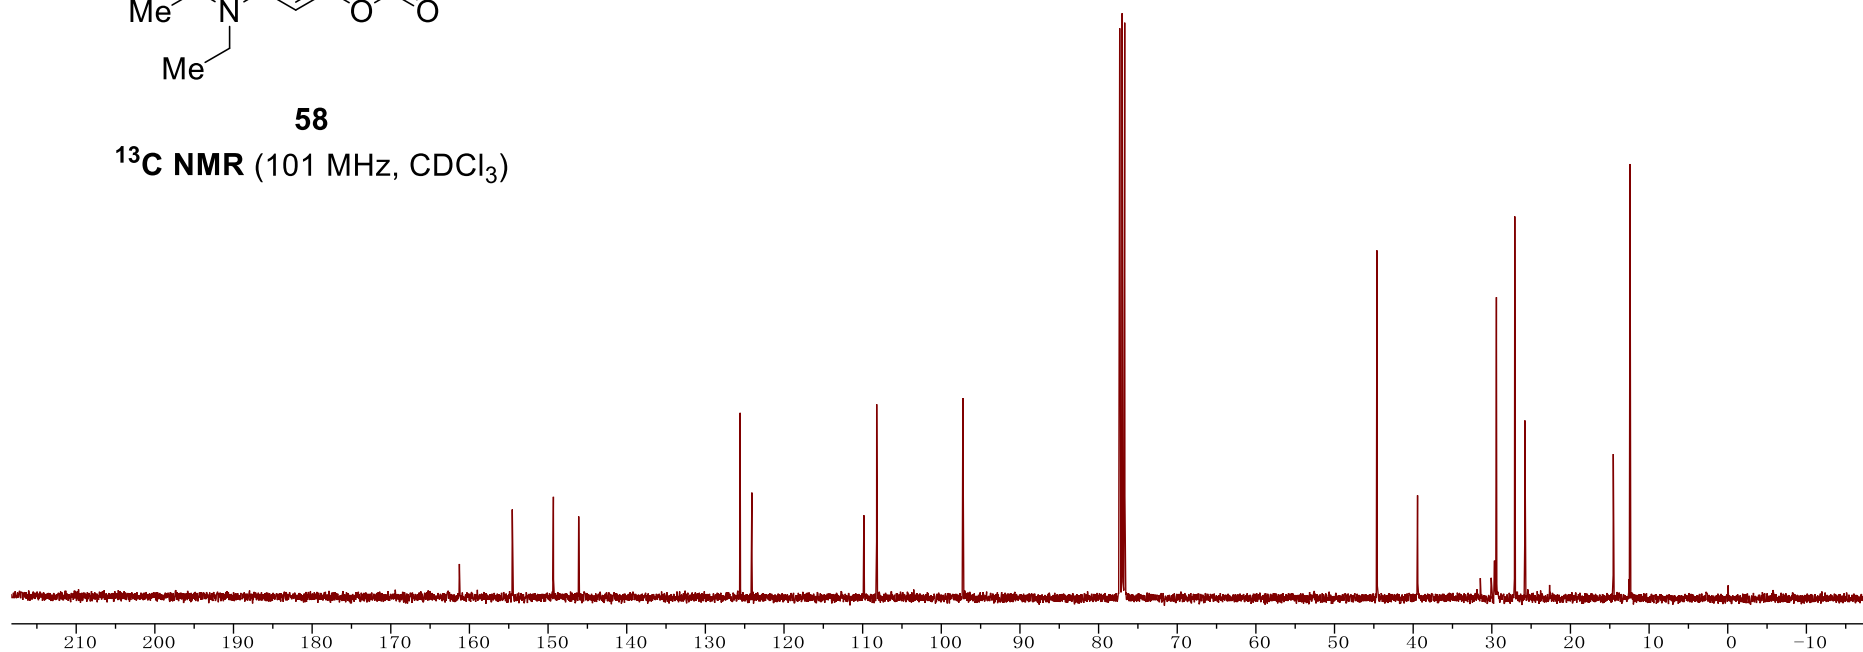

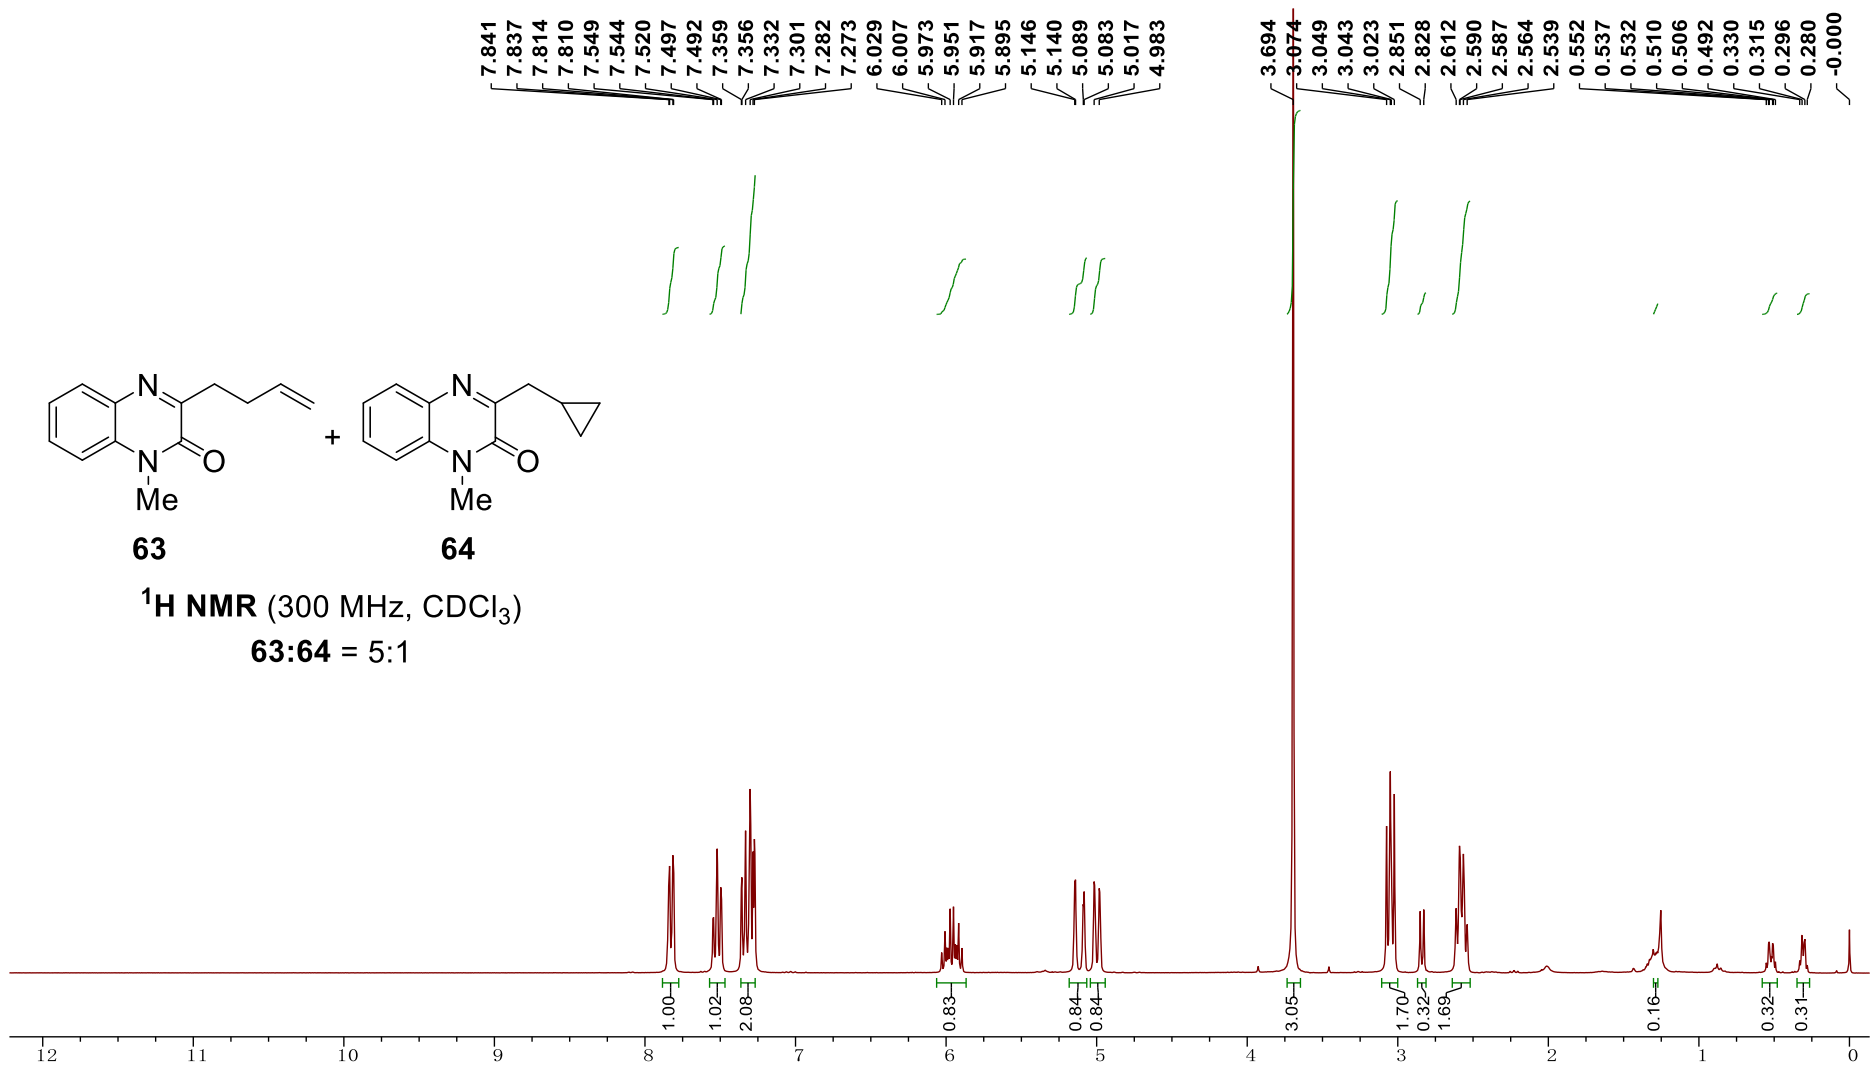

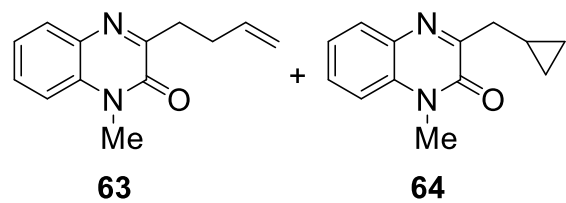

<sup>13</sup>C NMR (75 MHz, CDCl<sub>3</sub>)

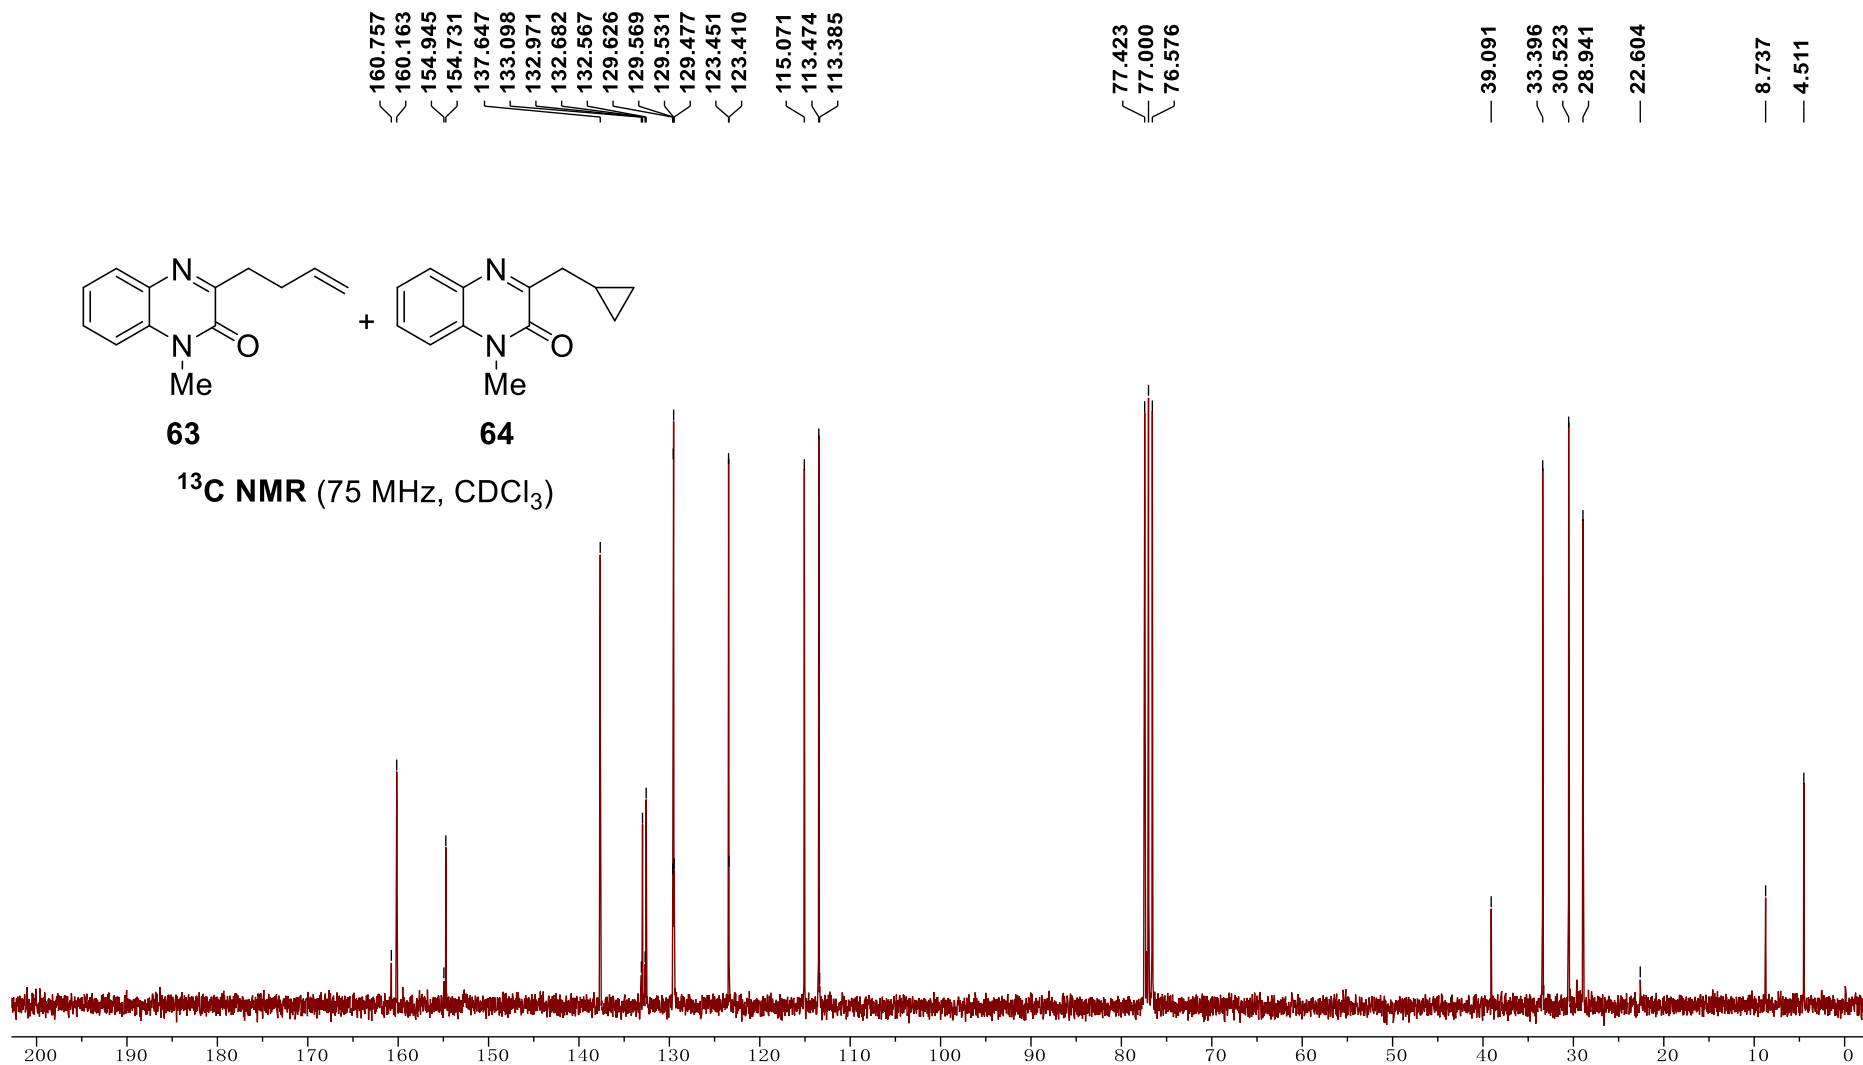



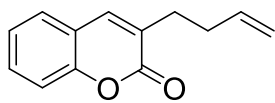

**65**

**<sup>1</sup>H NMR (400 MHz, CDCl<sub>3</sub>)**

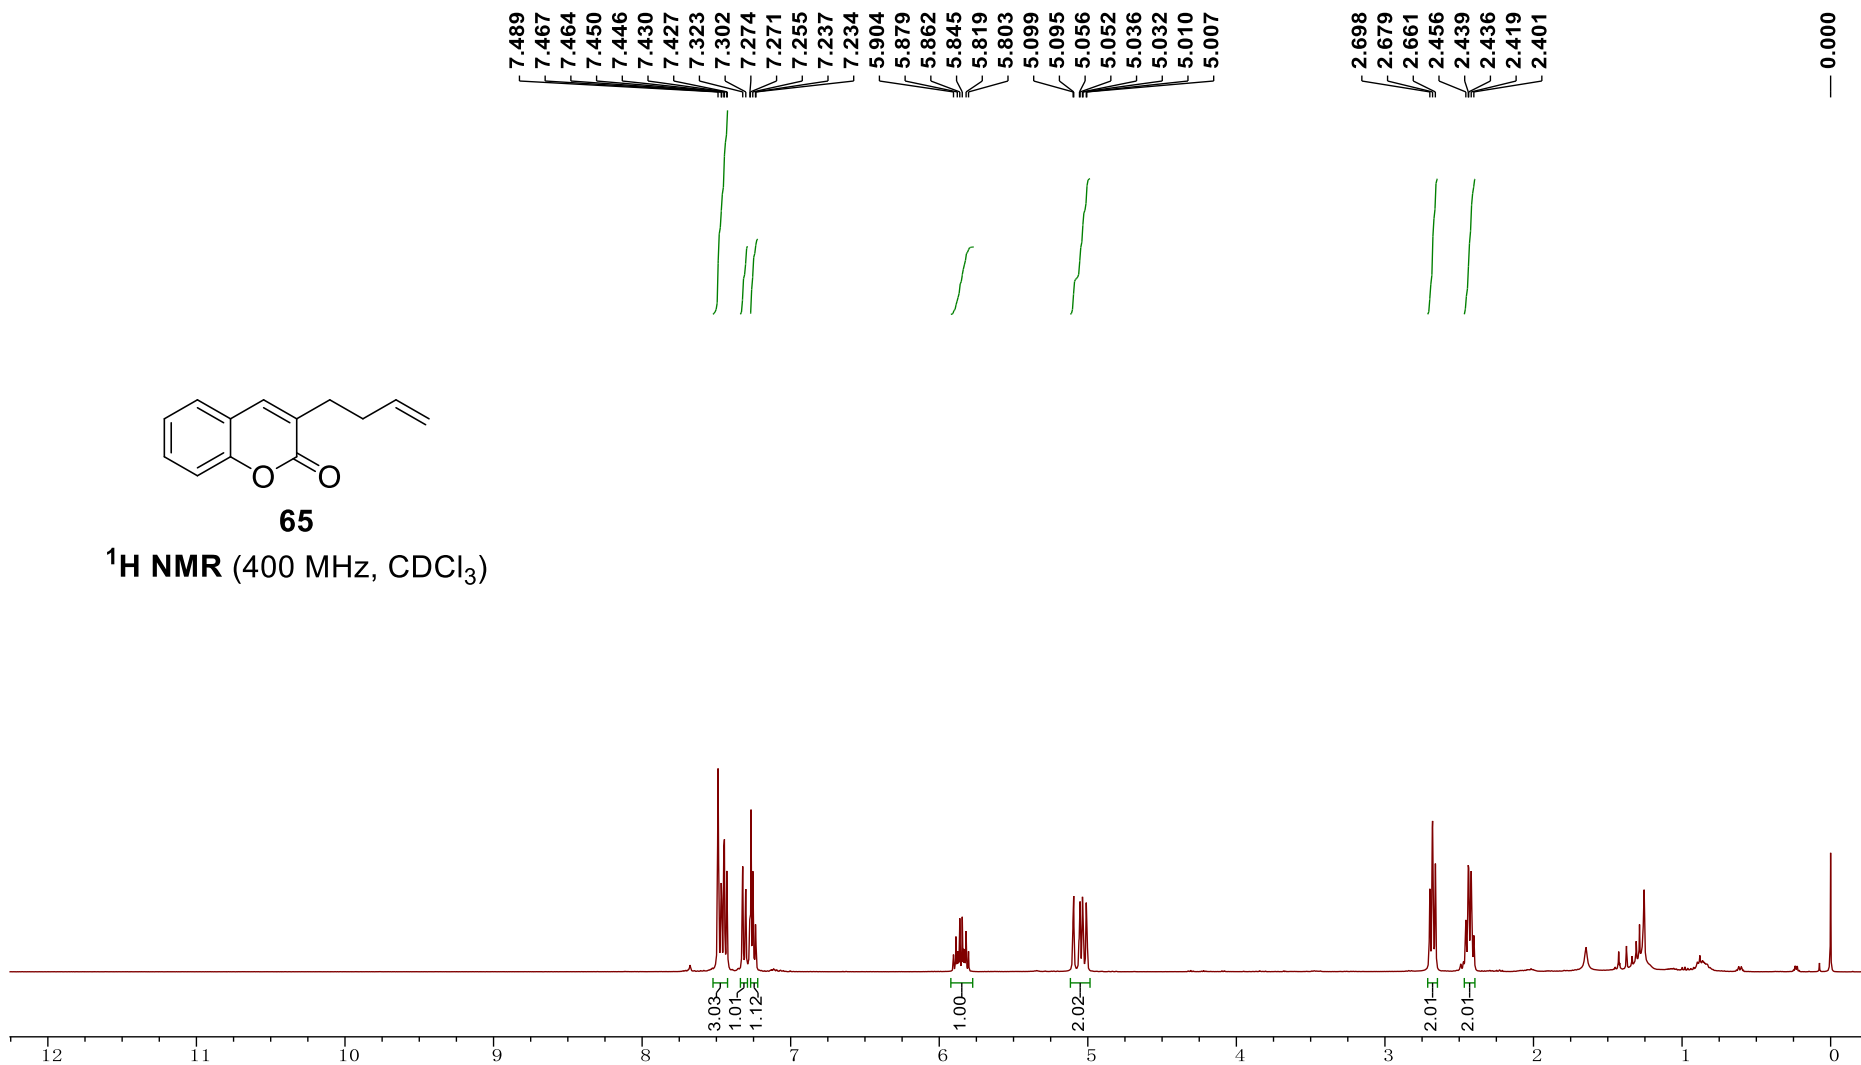

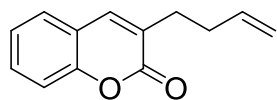

**65**

**$^{13}\text{C}$  NMR (101 MHz,  $\text{CDCl}_3$ )**

— 161.688

— 153.125

— 138.912

— 137.082

— 130.570

— 128.956

— 127.157

— 124.225

— 119.434

— 116.397

— 115.778

— 77.318

— 77.000

— 76.682

— 31.866

— 30.236

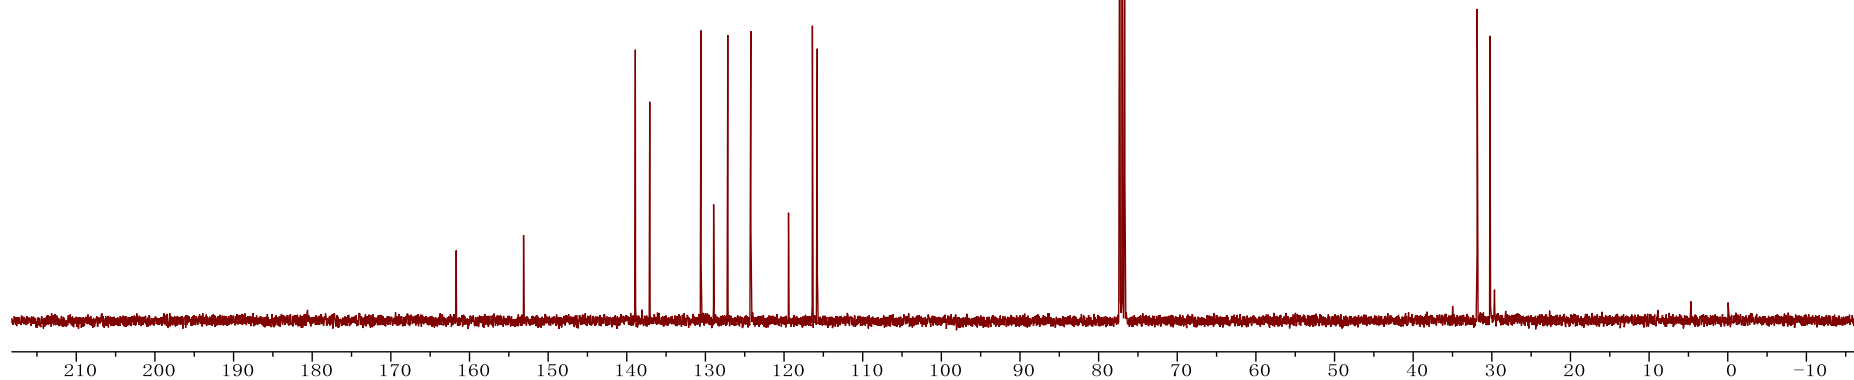

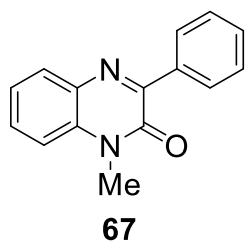

**<sup>1</sup>H NMR (400 MHz, CDCl<sub>3</sub>)**

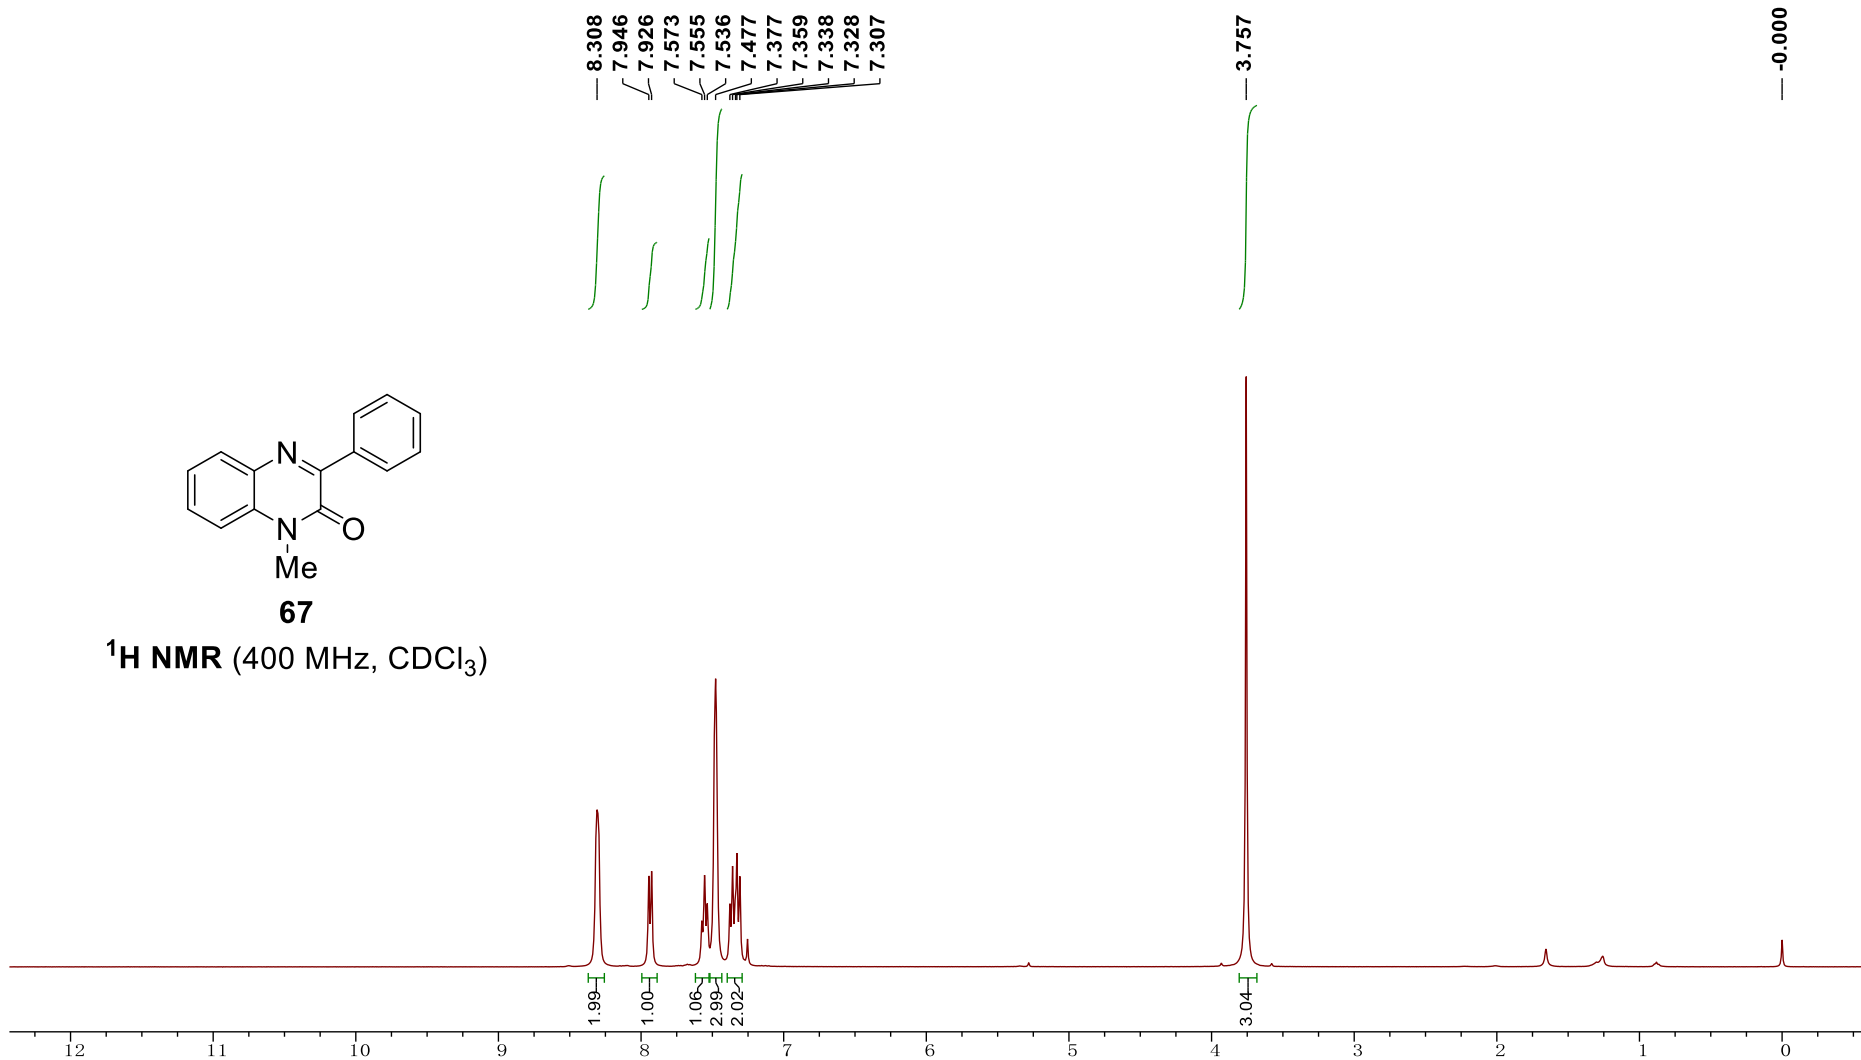

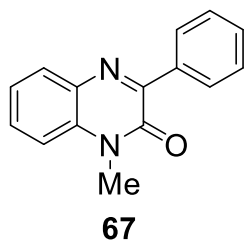

**$^{13}\text{C}$  NMR (101 MHz,  $\text{CDCl}_3$ )**

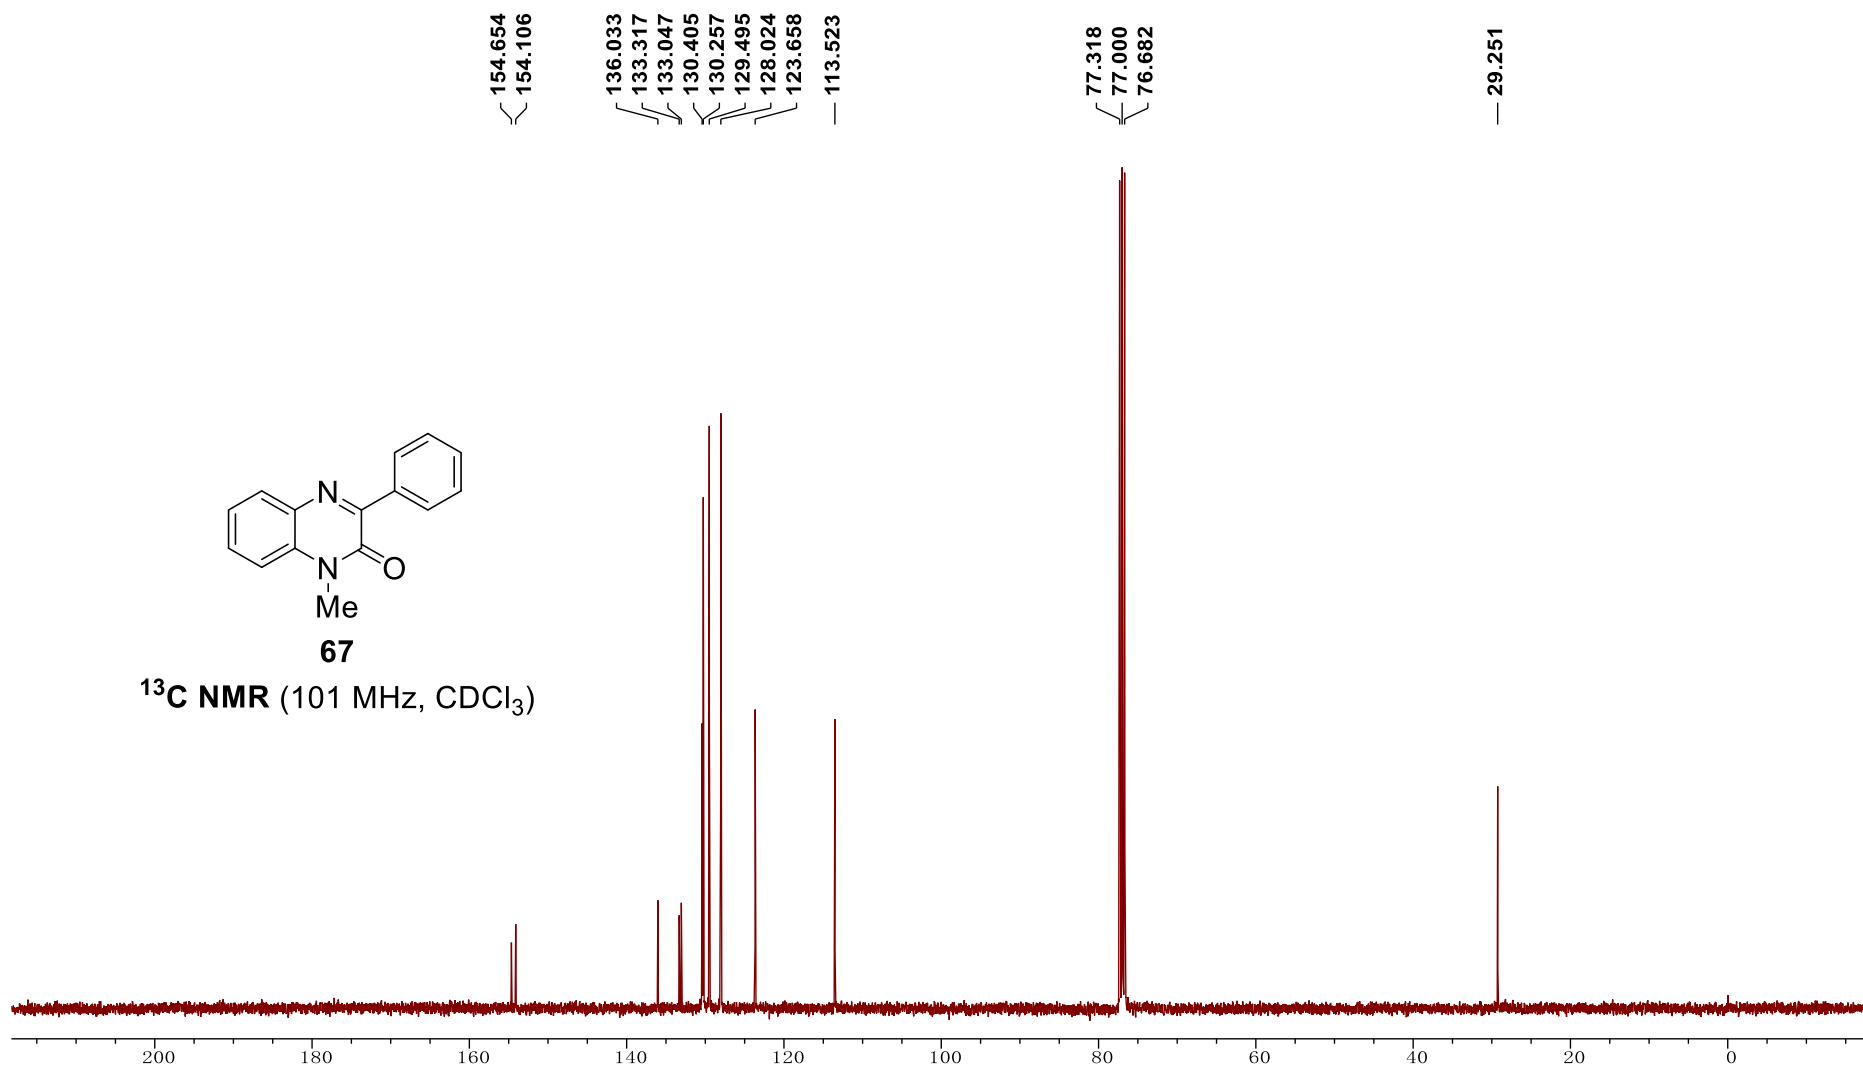

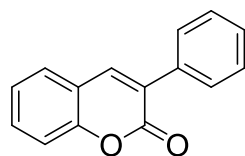

**68**

**<sup>1</sup>H NMR (400 MHz, CDCl<sub>3</sub>)**

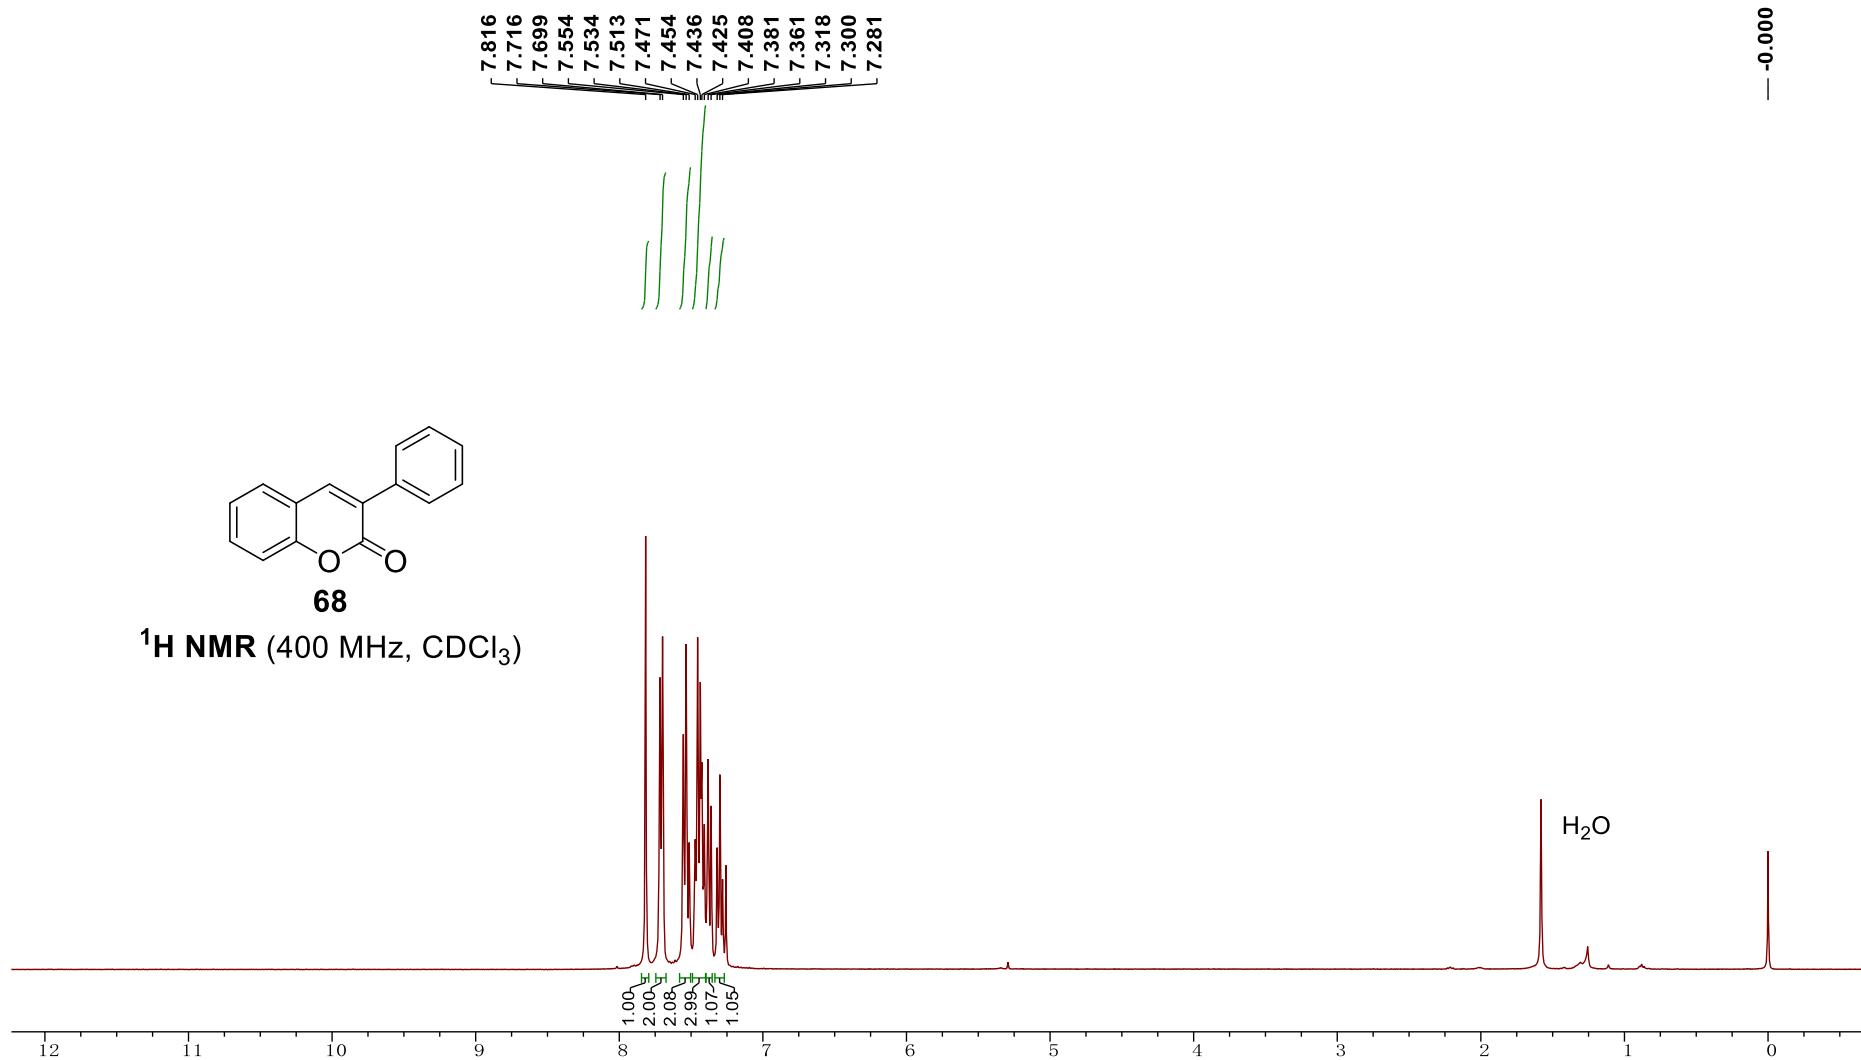

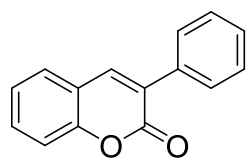

**68**

**<sup>13</sup>C NMR (101 MHz, CDCl<sub>3</sub>)**

— 160.563

— 153.506

139.834  
134.683  
131.374  
128.841  
128.510  
128.454  
128.358  
127.880  
124.469  
119.655  
116.446

77.318  
77.000  
76.682

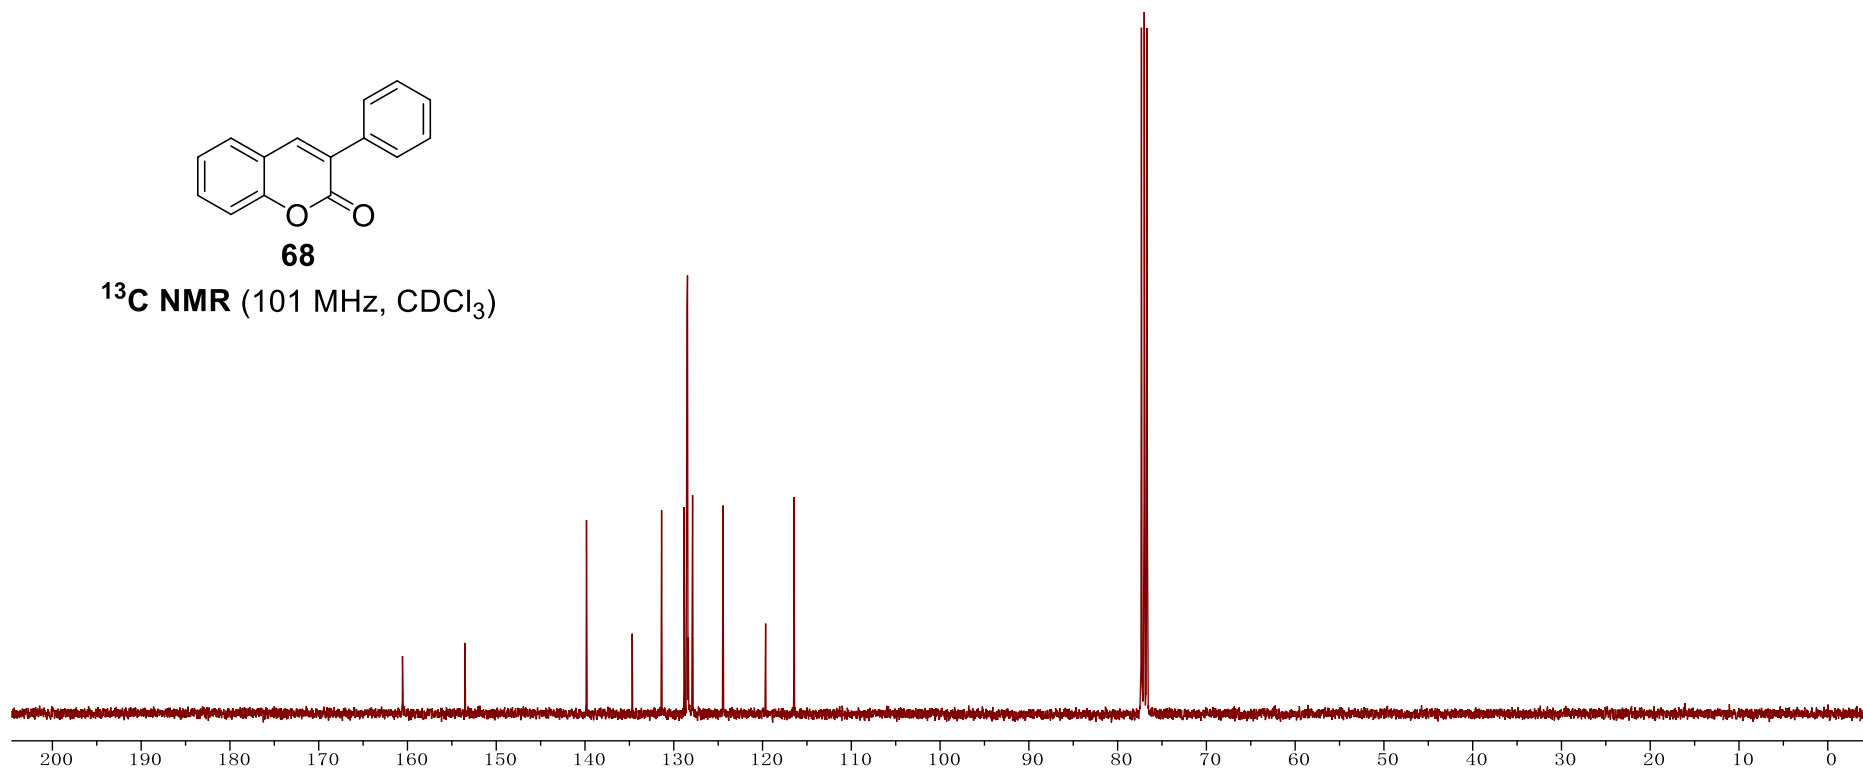

Supplement: d1gc03992j1.pdf [file d1gc03992j1.pdf]
